# Supplementary material for: Extracellular vesicle miR-32 derived from macrophage promotes arterial calcification in mice with type 2 diabetes via inhibiting VSMC autophagy
Source: J Transl Med. 2022 Jul 6;20:307. doi: 10.1186/s12967-022-03502-8 (PMC9258116; doi:10.1186/s12967-022-03502-8)
Supplement: Supplementary file 2 — Additional file 2. Transcriptome sequencing analyze the influence of macrophage for genes expression in VSMC. [file 12967_2022_3502_MOESM2_ESM.xlsx]

## Sheet: gene_exp（2倍）
ID	gene_type	Position	2-1_COUNT	2-2_COUNT	2-3_COUNT	3-1_COUNT	3-2_COUNT	3-3_COUNT	2-1_TPM	2-2_TPM	2-3_TPM	3-1_TPM	3-2_TPM	3-3_TPM	TTEST	倍数		删除条件
Crygs	protein_coding	chr16:22805203-22811410	4	5	1	0	0	0	0.722327	0.879854	0.179626	0	0	0	0.0487902	#DIV/0!		VSMC中无表达
Tmem178	protein_coding	chr17:80944632-81001816	4	5	1	0	0	0	0.406309	0.494918	0.101039	0	0	0	0.0487902	#DIV/0!		介于0.5-2倍的基因
Mlana	protein_coding	chr19:29697541-29708447	5	2	2	0	0	0	1.19802	0.466971	0.47667	0	0	0	0.0420135	#DIV/0!		无显著性差异的基因
Gm40386	lncRNA	chr12:35038321-35042667	4	1	4	0	0	0	0.203575	0.0495941	0.202497	0	0	0	0.0411614	#DIV/0!		重复基因
Gm41585	lncRNA	chr17:45935294-45946453	4	1	3	0	0	0	0.194661	0.0474226	0.145223	0	0	0	0.0405691	#DIV/0!
1700007F19Rik	lncRNA	chr3:58141707-58163807	3	1	4	0	0	0	0.314754	0.102239	0.417449	0	0	0	0.0400698	#DIV/0!
Slc7a13	protein_coding	chr4:19818727-19842213	3	1	4	0	0	0	0.242186	0.0786674	0.321205	0	0	0	0.0400698	#DIV/0!
Gm5791	pseudogene	chr13:64624067-64624802	6	2	3	0	0	0	1.40442	0.456185	0.69849	0	0	0	0.039977	#DIV/0!
LOC102631749	pseudogene	chr8:22407204-22409382	4	3	1	0	0	0	0.346804	0.253462	0.0862421	0	0	0	0.0398495	#DIV/0!
LOC105243573	lncRNA	chr9:120860889-120866756	1	4	4	0	0	0	0.0622156	0.242508	0.247545	0	0	0	0.0391585	#DIV/0!
Gm36551	lncRNA	chr5:137856886-137865527	3	4	1	0	0	0	0.118078	0.153417	0.0391508	0	0	0	0.037449	#DIV/0!
Borg	lncRNA	chr15:38713483-38728516	3	4	1	0	0	0	0.186849	0.242771	0.0619533	0	0	0	0.037449	#DIV/0!
ENSMUSG00000111894.1	lincRNA	chr10:23573020-23609431	7	8	2	0	0	0	1.35042	1.50393	0.383792	0	0	0	0.0369815	#DIV/0!
B3galt5	protein_coding	chr16:96235801-96319859	5	7	14	0	0	0	0.13256	0.180845	0.369203	0	0	0	0.0344535	#DIV/0!
Upk3b	protein_coding	chr5:136038496-136044993	36	15	16	0	0	0	3.04612	1.23681	1.34666	0	0	0	0.0327706	#DIV/0!
LOC108167897	lncRNA	chr11:49263918-49269186	3	1	2	0	0	0	1.5567	0.505651	1.03231	0	0	0	0.0272814	#DIV/0!
Gm41816	lncRNA	chr19:20437754-20441386	3	2	1	0	0	0	0.584644	0.37981	0.19385	0	0	0	0.0267514	#DIV/0!
Gm35330	lncRNA	chr13:5690821-5724611	6	4	2	0	0	0	2.19459	1.4257	0.727656	0	0	0	0.0267514	#DIV/0!
Smim9	protein_coding	chrX:75146057-75163756	2	1	3	0	0	0	0.212161	0.103372	0.316557	0	0	0	0.0266961	#DIV/0!
Doxl2	protein_coding	chr6:48974812-48978745	1	2	3	0	0	0	0.0656036	0.127857	0.195769	0	0	0	0.0260121	#DIV/0!
4833415N18Rik	lncRNA	chr16:11779702-11781501	2	3	1	0	0	0	0.34455	0.503629	0.171363	0	0	0	0.0239685	#DIV/0!
Gm31423	lncRNA	chr5:64531928-64537825	6	2	5	0	0	0	0.682278	0.221619	0.565554	0	0	0	0.0239589	#DIV/0!
ENSMUSG00000104591.1	TEC	chr5:97046181-97046808	1	3	2	0	0	0	0.274323	0.801956	0.545742	0	0	0	0.0238151	#DIV/0!
Gm42363	lncRNA	chr4:154964284-154965313	1	3	2	0	0	0	0.36345	1.06251	0.72305	0	0	0	0.0238151	#DIV/0!
Mybpc1	protein_coding	chr10:88518279-88605236	1	3	2	0	0	0	0.0373861	0.109294	0.0743763	0	0	0	0.0238151	#DIV/0!
Lrtm1	protein_coding	chr14:29018208-29033642	26	31	10	0	0	0	0.612073	0.711145	0.234166	0	0	0	0.023329	#DIV/0!
Aldh1a7	protein_coding	chr19:20692953-20727556	20	10	9	0	0	0	1.67257	0.814933	0.748673	0	0	0	0.0222485	#DIV/0!
Gm34489	lncRNA	chr12:12421041-12524489	5	2	3	0	0	0	0.178857	0.069716	0.106746	0	0	0	0.0209061	#DIV/0!
Myh2	protein_coding	chr11:67171027-67197517	7	11	18	0	0	0	0.198245	0.303574	0.507074	0	0	0	0.0206496	#DIV/0!
Gm13985	lncRNA	chr2:117804649-117812802	11	10	4	0	0	0	0.718085	0.636136	0.259739	0	0	0	0.0189036	#DIV/0!
ENSMUSG00000107730.1	lincRNA	chr6:134928992-134930112	2	1	1	0	0	0	0.976063	0.47557	0.485447	0	0	0	0.0174183	#DIV/0!
Gm13687	pseudogene	chr2:80499207-80499822	2	1	1	0	0	0	0.559335	0.272526	0.278187	0	0	0	0.0174183	#DIV/0!
ENSMUSG00000106840.1	TEC	chr5:129875979-129876947	2	1	1	0	0	0	0.355573	0.173247	0.176845	0	0	0	0.0174183	#DIV/0!
ENSMUSG00000108035.1	TEC	chr6:148361141-148364656	2	1	1	0	0	0	0.0979949	0.0477464	0.048738	0	0	0	0.0174183	#DIV/0!
Cldn19	protein_coding	chr4:119255441-119262438	2	1	1	0	0	0	0.0813386	0.0396308	0.040454	0	0	0	0.0174183	#DIV/0!
1700061I17Rik	lncRNA	chr3:117060522-117077765	2	1	1	0	0	0	0.175612	0.0855638	0.087341	0	0	0	0.0174183	#DIV/0!
1700095J12Rik	lncRNA	chr4:138137580-138138518	2	1	1	0	0	0	0.458178	0.22324	0.227876	0	0	0	0.0174183	#DIV/0!
Erp27	protein_coding	chr6:136907314-136922461	2	1	1	0	0	0	0.185043	0.0901591	0.0920317	0	0	0	0.0174183	#DIV/0!
Pvrig	protein_coding	chr5:138341770-138359800	4	2	2	0	0	0	0.100058	0.0487516	0.0497642	0	0	0	0.0174183	#DIV/0!
Gm39198	lncRNA	chr8:72766388-72784995	1	1	2	0	0	0	0.115776	0.11282	0.230327	0	0	0	0.0167575	#DIV/0!
ENSMUSG00000112347.1	bidirectional_promoter_lncRNA	chr10:62602350-62604128	1	1	2	0	0	0	0.0968382	0.0943655	0.192651	0	0	0	0.0167575	#DIV/0!
ENSMUSG00000113741.1	lincRNA	chr12:35534421-35590446	2	2	4	0	0	0	0.421726	0.410958	0.838986	0	0	0	0.0167575	#DIV/0!
Acmsd	protein_coding	chr1:127729413-127767564	1	1	2	0	0	0	0.0748046	0.0728946	0.148817	0	0	0	0.0167575	#DIV/0!
Gm34963	lncRNA	chr11:43675739-43681991	1	1	2	0	0	0	0.318438	0.310307	0.633504	0	0	0	0.0167575	#DIV/0!
Chrm5	protein_coding	chr2:112478733-112537470	1	1	2	0	0	0	0.0326402	0.0318068	0.0649348	0	0	0	0.0167575	#DIV/0!
ENSMUSG00000086344.1	lincRNA	chr13:24366776-24375950	1	1	2	0	0	0	0.277416	0.270332	0.551894	0	0	0	0.0167575	#DIV/0!
Gm33454	lncRNA	chr1:36464718-36471546	1	1	2	0	0	0	0.149544	0.145726	0.297505	0	0	0	0.0167575	#DIV/0!
ENSMUSG00000100348.1	antisense	chr8:57320987-57324233	1	1	2	0	0	0	0.388883	0.378953	0.773648	0	0	0	0.0167575	#DIV/0!
Gm35723	lncRNA	chr11:32782023-32845320	1	1	2	0	0	0	0.261816	0.255131	0.52086	0	0	0	0.0167575	#DIV/0!
Ntm	protein_coding	chr9:28994750-29963486	2	2	4	0	0	0	0.066851	0.065144	0.132994	0	0	0	0.0167575	#DIV/0!
Slc17a1	protein_coding	chr13:23867723-23895730	1	1	2	0	0	0	0.054277	0.052891	0.107979	0	0	0	0.0167575	#DIV/0!
Ephb1	protein_coding	chr9:101922128-102354693	10	4	8	0	0	0	0.369135	0.143884	0.293744	0	0	0	0.015319	#DIV/0!
4930573O16Rik	lncRNA	chr2:52291002-52315240	7	17	11	0	0	0	2.96296	7.01203	4.63143	0	0	0	0.0143286	#DIV/0!
Gm17740	pseudogene	chr14:69760314-69763709	1	2	1	0	0	0	0.0570447	0.111176	0.0567427	0	0	0	0.0143269	#DIV/0!
ENSMUSG00000113016.1	lincRNA	chr13:33569021-33572086	1	2	1	0	0	0	0.341816	0.666175	0.340006	0	0	0	0.0143269	#DIV/0!
ENSMUSG00000102434.1	TEC	chr1:36029647-36031018	1	2	1	0	0	0	0.125565	0.244717	0.1249	0	0	0	0.0143269	#DIV/0!
ENSMUSG00000106337.1	TEC	chr5:57929750-57931216	1	2	1	0	0	0	0.117434	0.22887	0.116812	0	0	0	0.0143269	#DIV/0!
Dnase1l3	protein_coding	chr14:7965187-7994765	1	2	1	0	0	0	0.0413427	0.0805741	0.0411238	0	0	0	0.0143269	#DIV/0!
ENSMUSG00000084783.1	antisense	chr8:11399186-11417892	1	2	1	0	0	0	0.231864	0.451887	0.230637	0	0	0	0.0143269	#DIV/0!
Acot12	protein_coding	chr13:91741505-91786148	2	4	2	0	0	0	0.112414	0.219088	0.111819	0	0	0	0.0143269	#DIV/0!
Gm38427	misc_RNA	chr8:70272349-70279916	1	2	1	0	0	0	0.0686082	0.133713	0.0682449	0	0	0	0.0143269	#DIV/0!
BC016579	protein_coding	chr16:45626848-45655852	7	3	7	0	0	0	0.230755	0.0963698	0.229533	0	0	0	0.0141332	#DIV/0!
Gfra3	protein_coding	chr18:34689898-34720387	4	9	10	0	0	0	0.345068	0.756578	0.858102	0	0	0	0.0140912	#DIV/0!
Drd5	protein_coding	chr5:38319509-38322523	4	5	2	0	0	0	0.228557	0.278402	0.113674	0	0	0	0.0132459	#DIV/0!
Il1f10	protein_coding	chr2:24291196-24293820	10	14	6	0	0	0	3.20214	4.36853	1.91111	0	0	0	0.011217	#DIV/0!
ENSMUSG00000107318.1	antisense	chr5:134747042-134822967	9	5	5	0	0	0	1.08198	0.585751	0.597917	0	0	0	0.00987121	#DIV/0!
Fhl5	protein_coding	chr4:25199907-25243046	10	6	13	0	0	0	1.20472	0.704376	1.55785	0	0	0	0.00953604	#DIV/0!
Gm28321	lncRNA	chr1:50812475-50817701	2	1	2	0	0	0	0.140175	0.0682979	0.139433	0	0	0	0.0082482	#DIV/0!
LOC108168763	lncRNA	chr2:65224930-65240196	2	1	2	0	0	0	0.024888	0.0121263	0.0247563	0	0	0	0.0082482	#DIV/0!
Sost	protein_coding	chr11:101962458-101967015	23	25	12	0	0	0	1.80846	1.91552	0.938547	0	0	0	0.00736553	#DIV/0!
Ccdc129	protein_coding	chr6:55804632-55978743	2	2	1	0	0	0	0.0513335	0.0500227	0.0255308	0	0	0	0.00727885	#DIV/0!
Gm17059	lncRNA	chr10:59799202-59805691	2	2	1	0	0	0	0.0578784	0.0564005	0.028786	0	0	0	0.00727885	#DIV/0!
Gm12816	pseudogene	chr4:112955008-112956289	2	2	1	0	0	0	0.26876	0.261897	0.133668	0	0	0	0.00727885	#DIV/0!
Ttc22	protein_coding	chr4:106622449-106640196	2	2	1	0	0	0	0.134328	0.130898	0.0668082	0	0	0	0.00727885	#DIV/0!
LOC108167829	lncRNA	chr10:95512227-95514786	2	2	1	0	0	0	0.43015	0.419166	0.213936	0	0	0	0.00727885	#DIV/0!
Gm34043	lncRNA	chr10:83936617-83963723	3	2	4	0	0	0	0.244016	0.158523	0.323632	0	0	0	0.00709326	#DIV/0!
Serpina9	protein_coding	chr12:103996613-104013776	1	2	2	0	0	0	0.0877164	0.170953	0.174504	0	0	0	0.00702117	#DIV/0!
Slc6a5	protein_coding	chr7:49906971-49963864	1	2	2	0	0	0	0.0202415	0.0394492	0.0402686	0	0	0	0.00702117	#DIV/0!
Lrtm2	protein_coding	chr6:119315133-119332273	1	2	2	0	0	0	0.0430472	0.0838961	0.0856387	0	0	0	0.00702117	#DIV/0!
ENSMUSG00000097014.1	lincRNA	chr1:133610411-133614422	1	2	2	0	0	0	0.230932	0.45007	0.459418	0	0	0	0.00702117	#DIV/0!
Abcg3	protein_coding	chr5:104935050-104982811	3	6	6	0	0	0	0.135472	0.264025	0.269509	0	0	0	0.00702117	#DIV/0!
Myl7	protein_coding	chr11:5896637-5898782	3	6	4	0	0	0	0.875975	1.70722	1.16178	0	0	0	0.00688767	#DIV/0!
Gm33937	lncRNA	chr11:87357523-87361744	4	7	4	0	0	0	0.231397	0.394605	0.230172	0	0	0	0.00640034	#DIV/0!
Atp1a4	protein_coding	chr1:172223508-172258424	5	3	3	0	0	0	0.233372	0.136448	0.139282	0	0	0	0.00597029	#DIV/0!
Gm33784	lncRNA	chrX:9480573-9484526	3	4	2	0	0	0	0.456963	0.593727	0.303029	0	0	0	0.00579149	#DIV/0!
Pkhd1l1	protein_coding	chr15:44457372-44601376	14	23	13	0	0	0	0.171017	0.273782	0.157961	0	0	0	0.00537815	#DIV/0!
Sema5b	protein_coding	chr16:35541154-35664261	37	23	23	0	0	0	1.24132	0.751928	0.767546	0	0	0	0.00459183	#DIV/0!
Gm41423	lncRNA	chr16:15101376-15114218	7	4	7	0	0	0	1.09232	0.608247	1.08654	0	0	0	0.00441719	#DIV/0!
ENSMUSG00000105258.1	lincRNA	chr3:41163048-41172663	5	4	7	0	0	0	0.628741	0.490149	0.875577	0	0	0	0.00413352	#DIV/0!
ENSMUSG00000103301.1	TEC	chr12:86069173-86069779	24	26	15	0	0	0	7.55869	7.97949	4.69917	0	0	0	0.00281505	#DIV/0!
Gm15422	pseudogene	chr14:123983974-123986711	5	3	4	0	0	0	0.3146	0.18394	0.250348	0	0	0	0.0027032	#DIV/0!
Krt79	protein_coding	chr15:101929332-101940324	3	2	2	0	0	0	0.246459	0.160111	0.163436	0	0	0	0.00254366	#DIV/0!
LOC102635386	pseudogene	chr9:96583218-96586289	2	2	3	0	0	0	0.112158	0.109294	0.167347	0	0	0	0.00236406	#DIV/0!
Uroc1	protein_coding	chr6:90333238-90364551	11	7	10	0	0	0	0.535621	0.332146	0.48435	0	0	0	0.00180015	#DIV/0!
Gm40513	lncRNA	chr9:41886627-41890549	2	3	2	0	0	0	1.42967	2.08974	1.4221	0	0	0	0.00174009	#DIV/0!
Cfap206	protein_coding	chr4:34688574-34730236	3	2	3	0	0	0	0.221718	0.144038	0.220544	0	0	0	0.00160476	#DIV/0!
9530036M11Rik	misc_RNA	chr6:54139523-54151442	3	2	3	0	0	0	0.0510193	0.0331444	0.0507492	0	0	0	0.00160476	#DIV/0!
LOC108167558	lncRNA	chr8:122343641-122346036	7	8	5	0	0	0	0.5386	0.599826	0.382677	0	0	0	0.00142692	#DIV/0!
Ano2	protein_coding	chr6:125690387-126040133	9	7	6	0	0	0	0.357747	0.271143	0.237235	0	0	0	0.00129506	#DIV/0!
Tigd4	protein_coding	chr3:84593574-84597032	3	3	2	0	0	0	0.149415	0.145599	0.0990824	0	0	0	0.00125128	#DIV/0!
P2rx1	protein_coding	chr11:72999056-73015200	5	4	6	0	0	0	0.339525	0.264685	0.405273	0	0	0	0.00115837	#DIV/0!
Abca12	protein_coding	chr1:71243090-71414910	5	5	7	0	0	0	0.103493	0.100851	0.144124	0	0	0	0.00115376	#DIV/0!
Sh2d1b1	protein_coding	chr1:170277324-170285662	4	5	6	0	0	0	0.48088	0.585751	0.7175	0	0	0	0.000966247	#DIV/0!
Heyl	protein_coding	chr4:123233556-123249870	96	96	66	0	0	0	3.64925	3.55607	2.49558	0	0	0	0.000944583	#DIV/0!
Gm34342	lncRNA	chr1:184732066-184739520	4	3	3	0	0	0	1.79453	1.31153	1.33877	0	0	0	0.000697139	#DIV/0!
Mchr1	protein_coding	chr15:81235499-81238964	4	3	3	0	0	0	0.314801	0.230072	0.234851	0	0	0	0.000697139	#DIV/0!
Cecr6	protein_coding	chr6:120488939-120493807	4	3	3	0	0	0	0.141528	0.103436	0.105584	0	0	0	0.000697139	#DIV/0!
Gm30788	lncRNA	chr1:72744536-72770485	8	11	8	0	0	0	0.261023	0.349742	0.259641	0	0	0	0.000623753	#DIV/0!
Gm36543	lncRNA	chr10:25698744-25714594	9	13	11	0	0	0	0.376512	0.529964	0.457745	0	0	0	0.000508868	#DIV/0!
Cyp11b1	protein_coding	chr15:74834892-74841643	18	23	24	0	0	0	1.29314	1.61016	1.71506	0	0	0	0.000264298	#DIV/0!
Tmem200c	protein_coding	chr17:68837136-68843138	5	6	5	0	0	0	0.268091	0.313494	0.266671	0	0	0	5.14576e-05	#DIV/0!
Pkhd1	protein_coding	chr1:20057779-20618082	6	7	6	0	0	0	0.0675898	0.0768412	0.0672319	0	0	0	2.33829e-05	#DIV/0!
Olfr78	protein_coding	chr7:102740721-102759471	51	48	50	0	0	0	2.51317	2.30494	2.45084	0	0	0	2.51263e-06	#DIV/0!
C230014O12Rik	lncRNA	chr2:34018289-34107735	2	2	2	0	0	0	0.128852	0.125562	0.12817	0	0	0	2.29067e-08	#DIV/0!
ENSMUSG00000103071.1	TEC	chr1:44756942-44758492	1	1	1	0	0	0	0.111074	0.108237	0.110485	0	0	0	2.29067e-08	#DIV/0!
Gm42294	lncRNA	chr4:63745032-63773177	1	1	1	0	0	0	0.281956	0.274756	0.280463	0	0	0	2.29067e-08	#DIV/0!
Gm37108	pseudogene	chr1:6916526-6923642	1	1	1	0	0	0	0.241282	0.235121	0.240004	0	0	0	2.29067e-08	#DIV/0!
Htr7	protein_coding	chr19:35958415-36058287	1	1	1	0	0	0	0.0421829	0.0411058	0.0419596	0	0	0	2.29067e-08	#DIV/0!
ENSMUSG00000110166.1	antisense	chr8:90848034-90849846	1	1	1	0	0	0	0.38114	0.371407	0.379122	0	0	0	2.29067e-08	#DIV/0!
LOC105244433	lncRNA	chr3:41560498-41563330	4	4	4	0	0	0	0.579563	0.564764	0.576494	0	0	0	2.29067e-08	#DIV/0!
Gm6822	pseudogene	chr1:55160643-55161096	1	1	1	0	0	0	0.379461	0.369771	0.377451	0	0	0	2.29067e-08	#DIV/0!
Gm41716	lncRNA	chr18:44269161-44275331	1	1	1	0	0	0	0.0461245	0.0449468	0.0458803	0	0	0	2.29067e-08	#DIV/0!
Lce3a	protein_coding	chr3:92925287-92926230	1	1	1	0	0	0	0.313798	0.305785	0.312137	0	0	0	2.29067e-08	#DIV/0!
Gm15704	lncRNA	chr6:145741127-145749588	1	1	1	0	0	0	0.0560791	0.0546472	0.0557822	0	0	0	2.29067e-08	#DIV/0!
Fam43b	protein_coding	chr4:138394092-138396458	1	1	1	0	0	0	0.072782	0.0709236	0.0723967	0	0	0	2.29067e-08	#DIV/0!
Gm14461	protein_coding	chr2:78237547-78302230	1	1	1	0	0	0	0.0967838	0.0943125	0.0962713	0	0	0	2.29067e-08	#DIV/0!
ENSMUSG00000113121.1	antisense	chr13:68998793-69031474	2	2	2	0	0	0	0.366153	0.356804	0.364215	0	0	0	2.29067e-08	#DIV/0!
Gm14843	pseudogene	chrX:101479270-101479661	1	1	1	0	0	0	0.439477	0.428256	0.43715	0	0	0	2.29067e-08	#DIV/0!
Jchain	protein_coding	chr5:88519809-88527897	1	1	1	0	0	0	0.0819577	0.079865	0.0815238	0	0	0	2.29067e-08	#DIV/0!
B430010I23Rik	lncRNA	chr8:41017468-41024216	1	1	1	0	0	0	0.0733398	0.0714671	0.0729515	0	0	0	2.29067e-08	#DIV/0!
A930016O22Rik	lncRNA	chr7:19417466-19421417	1	1	1	0	0	0	0.067295	0.0655766	0.0669387	0	0	0	2.29067e-08	#DIV/0!
Gm34315	lncRNA	chr15:10949648-10981650	1	1	1	0	0	0	0.260628	0.253973	0.259248	0	0	0	2.29067e-08	#DIV/0!
Gm8212	protein_coding	chr14:44197506-44201566	1	1	1	0	0	0	0.206813	0.201532	0.205718	0	0	0	2.29067e-08	#DIV/0!
ENSMUSG00000107841.1	TEC	chr6:54902422-54905728	1	1	1	0	0	0	0.0520941	0.0507639	0.0518183	0	0	0	2.29067e-08	#DIV/0!
Gm12807	pseudogene	chr4:110512763-110514256	1	1	1	0	0	0	0.115311	0.112367	0.114701	0	0	0	2.29067e-08	#DIV/0!
Gm15698	transcribed_pseudogene	chr11:88964665-88966917	884	818	882	0	6	2	187.551	169.117	186.136	0	0.909966	0.368083	6.93305e-06	424.712
Eln	protein_coding	chr5:134702595-134747368	12796	15935	11536	53	75	40	517.959	628.55	464.484	1.9954	2.17015	1.40453	0.000377723	289.223
Cntn2	protein_coding	chr1:132509425-132543251	56	56	66	0	1	0	0.992429	0.967088	1.16346	0	0.0126683	0	7.40457e-05	246.518
Dusp27	protein_coding	chr1:166098148-166127898	291	258	231	2	1	1	12.4552	10.7608	9.83474	0.0796195	0.030596	0.0371284	0.000139204	224.31
2210409E12Rik	transcribed_pseudogene	chr11:88972638-88973014	53	55	66	0	0	1	24.219	24.4912	29.9999	0	0	0.396397	0.000158549	198.564
Lgr5	protein_coding	chr10:115450314-115587780	176	120	169	1	0	2	6.43609	4.27619	6.14739	0.0340128	0	0.0634437	0.00117737	172.997
Wscd2	protein_coding	chr5:113489101-113589725	41	41	38	0	1	0	1.49932	1.46103	1.38225	0	0.0261407	0	2.22581e-06	166.124
Myom1	protein_coding	chr17:71019002-71126856	2835	2767	2499	22	22	32	66.4942	63.2421	58.3031	0.479939	0.368859	0.651073	1.28101e-05	125.37
Trpc4	protein_coding	chr3:54156051-54318471	20	28	28	0	0	1	0.635467	0.866937	0.884943	0	0	0.0275621	0.000624997	86.617
Ptprq	protein_coding	chr10:107514356-107720078	22	19	20	0	1	0	0.374659	0.315307	0.338796	0	0.0121737	0	4.41358e-05	84.5072
Plin4	protein_coding	chr17:56100587-56109953	332	346	306	8	0	5	8.12088	8.24722	7.44527	0.182007	0	0.106092	6.60773e-06	82.6568
Fcrls	protein_coding	chr3:87250758-87263765	213	233	226	5	0	4	15.6949	16.7302	16.5646	0.342674	0	0.255674	1.14184e-06	81.8748
Wdr72	protein_coding	chr9:74110331-74283203	47	31	42	0	1	1	1.50305	0.966059	1.33604	0	0.0228604	0.0277412	0.0014046	75.1983
Gm35546	lncRNA	chr1:186587070-186614781	48	37	39	0	0	2	2.4545	1.8437	1.98372	0	0	0.0887158	0.000383508	70.8095
Smpd3	protein_coding	chr8:106252548-106337988	910	1005	915	16	18	20	28.8022	30.9968	28.8071	0.471017	0.407253	0.549115	2.40374e-06	62.0758
Nxpe5	protein_coding	chr5:138207499-138251876	30	37	30	0	1	1	1.66182	1.99724	1.65302	0	0.0395977	0.048052	0.000108092	60.6058
Apba2	protein_coding	chr7:64501706-64753878	28	14	9	1	0	0	1.26806	0.617841	0.405433	0.0421226	0	0	0.0447849	54.3968
Rxfp3	protein_coding	chr15:11033717-11037968	115	85	100	2	4	1	4.65937	3.35594	4.03017	0.0753689	0.11585	0.0351462	0.000474109	53.2126
Fam81a	protein_coding	chr9:70088511-70142555	60	52	50	1	3	0	2.49132	2.10402	2.06511	0.03862	0.0890446	0	9.55158e-05	52.1715
Ntrk3	protein_coding	chr7:78179986-78579180	102	124	108	0	3	5	0.92582	1.09677	0.97509	0	0.019465	0.0393682	4.69629e-05	50.9521
Gpr165	protein_coding	chrX:96713468-96719388	22	32	29	1	1	0	1.18662	1.68192	1.55589	0.0501673	0.0385563	0	0.000638784	49.8676
Sh3bgr	protein_coding	chr16:96185798-96228937	93	99	97	3	1	3	10.7096	11.1095	11.1111	0.321325	0.0823187	0.299683	2.51914e-07	46.8206
Acan	protein_coding	chr7:79053202-79115099	58	71	38	2	0	2	1.28928	1.53796	0.840231	0.0413508	0	0.0385656	0.00427319	45.8914
Oxtr	protein_coding	chr6:112473684-112491308	80	80	122	1	5	2	2.49087	2.42727	3.77847	0.0289597	0.111286	0.0540183	0.0030107	44.7671
Bmp3	protein_coding	chr5:98854415-98884053	46	34	33	1	1	1	1.25748	0.905711	0.897331	0.0254259	0.0195412	0.0237134	0.00109805	44.5617
Myh11	protein_coding	chr16:14194527-14291408	4807	4778	4959	142	143	108	123.196	119.326	126.419	3.38489	2.6198	2.40103	5.28983e-07	43.8918
Nat8l	protein_coding	chr5:33995984-34005916	46	54	70	0	3	2	1.21376	1.38847	1.83725	0	0.0565854	0.0457778	0.00149223	43.3699
LOC105246151	lncRNA	chr16:87933354-88012206	13	8	10	0	1	0	0.695953	0.417343	0.532514	0	0.0382687	0	0.0028116	43.0067
ENSMUSG00000097495.1	lincRNA	chr13:51973214-51976583	30	34	34	0	2	1	2.2229	2.45496	2.50595	0	0.105934	0.064276	1.44851e-05	42.2055
Mylk2	protein_coding	chr2:152911276-152923065	103	131	123	4	5	2	4.38673	5.43678	5.21079	0.158452	0.152223	0.0738896	0.000107874	39.0943
Ppm1e	protein_coding	chr11:87226906-87358994	173	160	145	5	6	4	4.71949	4.25339	3.9347	0.126868	0.117006	0.0946583	5.16679e-05	38.1281
Itga8	protein_coding	chr2:12106632-12301920	732	808	873	30	28	17	19.374	20.8394	22.9835	0.73852	0.529753	0.390307	4.09391e-05	38.1031
Ndnf	protein_coding	chr6:65671611-65712323	643	600	681	15	23	23	7.21647	6.56194	7.60249	0.156581	0.184523	0.223919	2.19208e-05	37.8408
Aspn	protein_coding	chr13:49544443-49567565	1054	782	1324	22	34	47	77.1359	55.7686	96.3826	1.49752	1.7787	2.98376	0.00318202	36.6275
Cnn1	protein_coding	chr9:22099221-22109221	6229	6066	5892	199	210	193	510.757	484.692	480.567	15.1769	12.309	13.7279	9.26746e-07	35.8137
Olfml2a	protein_coding	chr2:38931980-38960585	186	178	167	6	7	5	13.3014	12.4043	11.8795	0.399089	0.357842	0.310174	8.11681e-06	35.2217
Acta1	protein_coding	chr8:123891758-123894775	679	761	571	24	21	23	74.4588	81.32	62.2841	2.44788	1.64616	2.18788	0.000223377	34.7127
Fbxl13	protein_coding	chr5:21483847-21645698	8	5	12	0	1	0	0.220936	0.134559	0.32965	0	0.0197417	0	0.0174916	34.7055
Akr1c14	protein_coding	chr13:4059591-4090422	182	172	172	4	5	9	12.8237	11.8097	12.055	0.262142	0.251838	0.550092	3.17702e-06	34.4793
Gm35701	lncRNA	chr4:100092757-100095643	9	22	25	1	1	0	0.881954	2.10084	2.4369	0.0911458	0.0700505	0	0.0207556	33.6217
Colec10	protein_coding	chr15:54410774-54466360	11	7	11	0	0	1	0.395126	0.245024	0.393034	0	0	0.0311597	0.00276207	33.1578
Art4	protein_coding	chr6:136848451-136857600	9	8	12	0	0	1	0.650367	0.563343	0.862565	0	0	0.0626853	0.00182227	33.1222
Sgca	protein_coding	chr11:94962777-94976327	5	9	17	1	0	0	0.495613	0.869324	1.67616	0.0921946	0	0	0.048277	32.9857
Ntf3	protein_coding	chr6:126101412-126166791	35	31	38	1	2	1	2.90725	2.50924	3.13973	0.0772586	0.118755	0.0720548	0.000116314	31.918
Olfml1	protein_coding	chr7:107567433-107591365	7	10	13	1	0	0	0.612456	0.852596	1.1314	0.0813785	0	0	0.00532171	31.9058
Endou	protein_coding	chr15:97711015-97731405	24	26	24	0	2	1	1.33117	1.40527	1.32412	0	0.0792973	0.0481139	2.93868e-06	31.8697
Gm39515	lncRNA	chrX:56682477-56684891	15	18	26	2	0	0	1.42848	1.67041	2.46293	0.177152	0	0	0.00484785	31.3957
Mrvi1	protein_coding	chr7:110868257-110982909	1186	1069	1160	29	53	51	28.6561	25.1697	27.8795	0.651724	0.915411	1.06894	1.57511e-05	30.9951
Gucy1a3	protein_coding	chr3:82092427-82145877	107	144	121	3	3	8	3.38104	4.434	3.80318	0.08817	0.0677634	0.219284	0.000267208	30.964
Agtr1b	protein_coding	chr3:20314473-20367177	25	36	22	1	0	2	2.006	2.81488	1.75593	0.0746317	0	0.13921	0.00275361	30.7555
Slc14a2	protein_coding	chr18:78146144-78596950	10	9	9	1	0	0	0.330662	0.289997	0.29602	0.0307551	0	0	5.45642e-05	29.8058
Gdf3	protein_coding	chr6:122605403-122610071	15	13	15	0	2	0	1.08577	0.916971	1.08002	0	0.103486	0	0.000108373	29.789
Gprin3	protein_coding	chr6:59344500-59426290	366	317	435	19	12	13	5.60468	4.73038	6.62603	0.270618	0.131359	0.172688	0.000574522	29.5148
H2-M1	protein_coding	chr17:36669030-36672197	7	3	11	0	1	0	0.94731	0.395623	1.48075	0	0.096739	0	0.0447244	29.1887
Hey2	protein_coding	chr10:30832359-30842783	194	166	172	6	5	11	13.1996	11.0061	11.6408	0.379702	0.243185	0.649233	6.40995e-05	28.1785
Lyve1	protein_coding	chr7:110850607-110862953	9	4	7	0	1	0	0.594736	0.257578	0.460123	0	0.0472377	0	0.0131632	27.7837
Trpc6	protein_coding	chr9:8543931-8680752	96	94	98	3	7	3	3.15197	3.0075	3.2006	0.0916148	0.164292	0.0854441	1.17396e-06	27.4207
ENSMUSG00000114051.1	processed_transcript	chr12:86078644-86079754	351	432	321	15	21	13	90.6575	108.729	82.47	3.60347	3.87725	2.91266	0.000309616	27.1189
Trac	C_region	chr14:54220521-54224198	78	47	60	4	2	2	14.7827	8.68007	11.3111	0.705101	0.270954	0.328805	0.0032555	26.6495
Actg2	protein_coding	chr6:83512909-83536251	5023	5176	4889	224	227	225	658.052	660.781	637.105	27.2947	21.2584	25.5699	1.35466e-07	26.3878
Drd3	protein_coding	chr16:43754015-43823846	10	8	5	0	0	1	0.6533	0.509294	0.32492	0	0	0.0566711	0.00791559	26.2482
Kcnk3	protein_coding	chr5:30588170-30625270	16	9	12	0	2	0	0.723465	0.396558	0.539726	0	0.064645	0	0.00540041	25.6748
Slco1a5	protein_coding	chr6:142234227-142322981	6	6	10	0	0	1	0.383117	0.373335	0.635148	0	0	0.0553898	0.00707385	25.1238
Piezo2	protein_coding	chr18:63010213-63387320	8798	8165	8028	363	486	346	138.292	125.065	125.52	5.30703	5.46079	4.71778	8.80662e-06	25.1121
Gm9991	misc_RNA	chr1:90674466-90679655	6	3	9	0	1	0	0.859942	0.418992	1.28308	0	0.102453	0	0.0311938	25.0067
Olfr558	protein_coding	chr7:102702323-102712058	5	9	4	0	1	0	0.291794	0.511818	0.232199	0	0.041717	0	0.0183676	24.8294
Gm41914	lncRNA	chr1:89577982-89580815	8	9	4	0	0	1	0.647651	0.710003	0.322111	0	0	0.0702264	0.0118834	23.9193
Gm30632	lncRNA	chr15:64534004-64572818	12	7	15	0	2	0	1.41306	0.803235	1.75697	0	0.168351	0	0.0111712	23.6011
Gm17115	lncRNA	chr17:32788394-32790439	4	5	8	0	1	0	0.397634	0.484351	0.791058	0	0.071061	0	0.0117934	23.5438
Nyap2	protein_coding	chr1:81076558-81367705	3	7	7	0	1	0	0.0327893	0.0745548	0.0761033	0	0.00781301	0	0.0153634	23.4797
Ifi27l2b	protein_coding	chr12:103450898-103457223	43	41	38	4	2	0	6.64379	6.17303	5.84017	0.574831	0.220895	0	3.1905e-05	23.4465
1700009N14Rik	protein_coding	chr4:39450293-39451780	47	46	53	1	5	2	6.4058	6.10942	7.18531	0.126768	0.487139	0.236458	4.93504e-05	23.1671
Krt7	protein_coding	chr15:101412403-101427806	11	5	4	0	0	1	1.19485	0.529244	0.432189	0	0	0.0942255	0.0467065	22.8842
Tbx20	protein_coding	chr9:24720812-24774303	7	6	7	0	0	1	0.174975	0.146149	0.174048	0	0	0.0216834	0.00018699	22.8365
Rgs4	protein_coding	chr1:169741477-169747642	710	692	750	37	26	48	41.5897	39.5003	43.7002	2.01587	1.0887	2.43904	6.33416e-06	22.5107
Gsta4	protein_coding	chr9:78191966-78209349	191	217	221	5	13	16	34.3471	38.0262	39.5315	0.836296	1.67112	2.4959	2.48286e-05	22.3662
Gm42002	lncRNA	chr5:113603228-113610998	49	48	38	1	1	5	5.49218	5.24272	4.23669	0.104251	0.0801228	0.486147	0.000299962	22.3283
C1qtnf3	protein_coding	chr15:10952114-10980162	534	522	541	24	37	26	33.0086	31.4429	33.2642	1.37984	1.63491	1.39415	7.00678e-07	22.1633
Cspg4	protein_coding	chr9:56865104-56899870	6467	7086	5627	352	390	292	138.398	147.773	119.784	7.00652	5.96621	5.42074	9.6592e-05	22.0706
ENSMUSG00000103303.1	TEC	chr1:156856217-156858859	33	35	35	1	4	1	2.15099	2.2231	2.26928	0.0606259	0.186377	0.0565425	2.69644e-06	21.8859
Gm28818	lncRNA	chr1:71894415-71899295	14	31	18	0	4	0	1.16402	2.51166	1.48867	0	0.237739	0	0.0165485	21.7228
Gm9939	lncRNA	chr8:34965883-34974147	5	5	9	0	0	1	0.242232	0.236046	0.433708	0	0	0.0420252	0.0119789	21.7009
Gpr183	protein_coding	chr14:121952331-121965193	4	10	5	0	0	1	0.234229	0.570619	0.291235	0	0	0.050796	0.0296934	21.5782
Lmod1	protein_coding	chr1:135324813-135368065	3488	3892	3620	194	217	200	152.434	165.747	157.365	7.8857	6.77912	7.58203	2.65063e-06	21.3759
Tgfb3	protein_coding	chr12:86056743-86079041	14932	14768	13856	760	959	745	759.944	732.406	701.449	35.9758	34.8891	32.8904	2.0792e-06	21.144
ENSMUSG00000112592.1	TEC	chr10:60808660-60814323	6	3	6	0	1	0	0.182495	0.0889175	0.181529	0	0.0217424	0	0.0107376	20.8322
Cdo1	protein_coding	chr18:46713205-46728582	746	740	826	46	47	41	70.6527	68.2949	77.8152	4.0521	3.18196	3.36839	1.81624e-05	20.4446
Mtss1	protein_coding	chr15:58941234-59082159	2050	1921	1964	109	124	113	54.7626	50.0062	52.1875	2.70825	2.36788	2.61853	3.51643e-06	20.3981
6820426E19Rik	misc_RNA	chr6:117495015-117500426	5	6	8	1	0	0	0.339258	0.396714	0.539938	0.0631092	0	0	0.00307928	20.2175
Prex2	protein_coding	chr1:10993272-11303683	1169	941	1217	82	40	68	17.6071	13.8111	18.233	1.14873	0.430665	0.888445	0.000354972	20.1192
Fgd2	protein_coding	chr17:29360904-29379535	13	20	21	1	0	2	0.6537	0.980013	1.05039	0.0467701	0	0.0872398	0.00242633	20.0291
Wnt4	protein_coding	chr4:137277635-137299501	20	38	39	2	3	1	0.901256	1.66866	1.74814	0.0838264	0.0966378	0.0390902	0.00723677	19.6674
Baalc	protein_coding	chr15:38933909-38952917	24	25	30	1	2	2	1.04199	1.05769	1.29559	0.0403816	0.0620709	0.0753234	0.000203698	19.0985
Upk1b	protein_coding	chr16:38773182-38800203	27	22	31	2	2	1	2.47548	1.96555	2.82717	0.170553	0.131079	0.0795326	0.000799321	19.0684
Vstm2b	protein_coding	chr7:40898342-40929972	30	33	24	3	0	2	2.38498	2.55649	1.89788	0.221829	0	0.137925	0.000481969	19.0112
Cx3cr1	protein_coding	chr9:120048683-120068296	101	87	96	4	7	7	4.63623	3.89161	4.38339	0.17078	0.229694	0.278735	5.06295e-05	19.0092
Gm30563	lncRNA	chr15:64383168-64436884	21	8	19	1	1	1	0.584172	0.216859	0.525738	0.0258734	0.0198851	0.0241307	0.0212763	18.9839
Ildr2	protein_coding	chr1:166254060-166316832	1718	1642	1779	95	103	123	33.8986	31.5717	34.9164	1.74347	1.45279	2.1053	6.08941e-06	18.9353
Aqp5	protein_coding	chr15:99591028-99594829	32	38	49	4	0	3	3.55435	4.11302	5.41379	0.413241	0	0.289056	0.00186032	18.6263
Npas4	protein_coding	chr19:4984353-5001929	479	457	359	29	26	27	11.0217	10.247	8.21682	0.620648	0.427657	0.538924	0.000375412	18.5768
Cmklr1	protein_coding	chr5:113612355-113650474	415	444	352	26	25	27	20.9599	21.852	17.6839	1.22137	0.902585	1.18292	0.00011517	18.294
Kif26b	protein_coding	chr1:178525749-178939200	1843	1877	1624	117	124	110	19.4132	19.2665	17.0158	1.14628	0.933686	1.00511	2.29809e-05	18.0532
AF357355	snoRNA	chr12:109654627-109654697	6	4	3	0	1	0	14.5585	9.45781	7.24069	0	1.73449	0	0.0117936	18.0208
Aldh1a3	protein_coding	chr7:66390892-66427477	2463	2580	2655	165	188	162	124.761	127.351	133.775	7.77379	6.8074	7.11836	1.45135e-06	17.7832
Sh3rf2	protein_coding	chr18:42051744-42158695	16	7	9	1	0	1	0.566112	0.24135	0.316752	0.0329091	0	0.0306925	0.0231309	17.6759
Col8a2	protein_coding	chr4:126286794-126314330	119	119	101	4	13	7	3.9281	3.8278	3.31628	0.122808	0.306751	0.200439	6.00392e-05	17.5749
Gm11627	lncRNA	chr11:102576399-102579119	35	21	33	2	2	2	8.90639	5.20739	8.353	0.473366	0.363807	0.441482	0.00359105	17.5706
Hist1h2ad	protein_coding	chr13:23574381-23574915	8	13	17	0	3	0	2.57608	4.07923	5.44518	0	0.690554	0	0.011486	17.5229
Fhl1	protein_coding	chrX:56731720-56793346	15468	14623	15603	922	1171	1046	762.665	702.591	765.248	42.2828	41.2728	44.7384	4.36528e-06	17.3859
Lrrc17	protein_coding	chr5:21543527-21575911	238	226	285	17	17	17	18.6625	17.269	22.2296	1.23986	0.952903	1.15635	0.00024713	17.3661
ENSMUSG00000106495.1	TEC	chr9:109572732-109574224	5	4	6	0	0	1	0.576943	0.449769	0.688666	0	0	0.100095	0.00216404	17.1375
Mgll	protein_coding	chr6:88724412-88828360	597	646	515	45	46	31	21.9714	23.1677	18.8532	1.54038	1.21018	0.98968	0.000101185	17.1091
Id4	protein_coding	chr13:48261427-48264036	481	533	577	29	50	34	49.9183	53.9024	59.5641	2.79927	3.7093	3.06085	5.31829e-05	17.0736
Tmtc1	protein_coding	chr6:148232430-148444847	524	476	532	38	24	42	8.58263	7.59736	8.66753	0.578903	0.281001	0.596744	2.64109e-05	17.058
Gm30525	lncRNA	chr11:53302627-53308551	9	10	13	2	0	0	0.779917	0.844448	1.12058	0.161201	0	0	0.00184286	17.0281
Nkain3	protein_coding	chr4:20111029-20780309	35	25	43	3	1	3	0.33753	0.234936	0.412484	0.026909	0.00689368	0.0250966	0.00399656	16.7226
Vipr1	protein_coding	chr9:121642716-121672954	18	12	16	2	0	1	0.632589	0.410958	0.559324	0.065375	0	0.0304859	0.00177775	16.7208
Tppp	protein_coding	chr13:74009419-74035753	102	92	74	6	12	2	3.4094	2.99663	2.46039	0.186536	0.286726	0.0579906	0.000600117	16.6897
Gm20675	lncRNA	chr14:67232416-67233195	3	3	6	0	1	0	1.21606	1.18501	2.41924	0	0.289762	0	0.0224398	16.6354
ENSMUSG00000085881.2	processed_transcript	chr13:74008009-74009354	12	9	10	2	0	0	1.59391	1.16491	1.32123	0.247084	0	0	0.00104194	16.5128
Gm13710	lncRNA	chr2:84500748-84506873	25	22	21	1	2	2	5.18901	4.44973	4.33569	0.193053	0.296744	0.360101	8.72162e-05	16.4425
F2rl2	protein_coding	chr13:95696920-95702768	19	17	20	1	1	2	1.32842	1.15824	1.39093	0.0650301	0.0499792	0.1213	7.59807e-05	16.409
Pgm5	protein_coding	chr19:24678261-24861842	75	73	57	5	6	4	1.61892	1.53552	1.22387	0.100385	0.0925814	0.0748987	0.000340678	16.3452
Tmem56	protein_coding	chr3:121202008-121283108	156	129	178	11	12	11	3.80287	3.06439	4.3162	0.249409	0.209111	0.232611	0.000652404	16.1814
Cilp	protein_coding	chr9:65265180-65280605	233	229	343	18	30	13	9.66533	9.25684	14.153	0.69449	0.889589	0.467793	0.0027718	16.1195
Fam189a2	protein_coding	chr19:23972750-24031272	22	39	23	2	1	3	0.919246	1.58796	0.955942	0.077727	0.0298687	0.108738	0.00771323	16.0084
Gpbar1	protein_coding	chr1:74278600-74279589	20	15	10	3	0	0	3.4803	2.54358	1.73094	0.485558	0	0	0.0102935	15.9709
Rgs6	protein_coding	chr12:82616665-83162061	18	19	26	1	3	1	0.383165	0.394124	0.55053	0.0197991	0.0456501	0.0184656	0.00163256	15.8234
C1qc	protein_coding	chr4:136889802-136892932	410	453	351	30	30	31	62.9526	67.7789	53.6082	4.28434	3.29275	4.12896	0.000159944	15.7474
Palmd	protein_coding	chr3:116918262-116968952	70	59	60	1	1	12	5.03728	4.1373	4.29481	0.0669316	0.0514406	0.749081	0.000309833	15.5275
Cd244	protein_coding	chr1:171558713-171585316	13	6	9	1	0	1	0.528451	0.237673	0.363914	0.0378089	0	0.0352623	0.014354	15.4649
Ryr2	protein_coding	chr13:11553099-12106945	20	14	13	0	3	1	0.20282	0.138349	0.131135	0	0.0217475	0.0087969	0.00338689	15.4629
Tmem184a	protein_coding	chr5:139804952-139819971	64	72	32	2	4	7	4.53169	4.96798	2.25385	0.131717	0.202464	0.42996	0.0123638	15.3813
Angptl1	protein_coding	chr1:156839023-156861078	304	228	273	23	16	22	23.914	17.4775	21.3617	1.68283	0.899717	1.50124	0.000488478	15.3664
Tns4	protein_coding	chr11:99065678-99089306	83	73	85	5	8	6	3.00712	2.57728	3.06327	0.16849	0.20719	0.18857	6.24962e-05	15.3259
Igfbp5	protein_coding	chr1:72858065-72874865	6366	6711	6437	607	413	462	187.343	192.453	188.429	16.6147	8.68815	11.794	3.64614e-07	15.3173
Gm39071	lncRNA	chr7:112186831-112187850	5	3	3	0	1	0	2.09072	1.2224	1.24779	0	0.298905	0	0.00930084	15.2587
Pcp4l1	protein_coding	chr1:171173264-171196268	18	19	18	0	5	0	1.96886	2.02517	1.95843	0	0.390948	0	0.000148947	15.2257
ENSMUSG00000086507.1	antisense	chr11:80158861-80177629	4	4	3	0	1	0	0.700305	0.682423	0.522448	0	0.125151	0	0.00107734	15.223
Gm8894	pseudogene	chr14:55420125-55420788	3	4	4	0	1	0	0.778351	1.0113	1.03231	0	0.185465	0	0.00100486	15.2156
Tgfb2	protein_coding	chr1:186622787-186706220	3892	3303	3505	306	259	263	123.343	102.004	110.491	9.01981	5.86746	7.23016	7.57039e-05	15.1843
Gm13986	lncRNA	chr2:117857291-118111202	49	51	81	2	3	9	2.4334	2.46806	4.00127	0.0923807	0.106499	0.387713	0.00620407	15.177
Gm30986	lncRNA	chr2:131740342-131749227	13	12	10	0	2	1	1.32913	1.19556	1.01699	0	0.146171	0.0886894	0.000383777	15.0799
4930426L09Rik	lncRNA	chr2:18998319-18999804	62	74	65	0	10	7	7.18779	8.35992	7.49569	0	0.828726	0.703965	7.96649e-05	15.0346
Gja3	protein_coding	chr14:57034460-57058030	147	117	93	4	12	13	8.61083	6.67852	5.41882	0.217932	0.502477	0.660572	0.0023466	14.9953
Slc17a8	protein_coding	chr10:89574020-89621249	4	5	5	1	0	0	0.14612	0.177986	0.181683	0.0339767	0	0	0.000599353	14.8863
Itgb6	protein_coding	chr2:60598292-60722603	17	20	10	0	2	2	0.547007	0.627106	0.320065	0	0.0460025	0.0558243	0.00769905	14.6737
ENSMUSG00000091393.1	antisense	chr1:166306741-166309585	189	197	199	10	10	27	11.4446	11.6245	11.9864	0.563214	0.43286	1.41825	6.21363e-06	14.5198
LOC102638002	lncRNA	chr14:46387954-46389450	11	14	15	2	0	1	1.38222	1.71427	1.87487	0.233748	0	0.109002	0.000646928	14.5043
ENSMUSG00000112682.1	TEC	chr10:95160361-95165660	27	18	27	3	3	0	0.877628	0.570146	0.872981	0.0906986	0.0697068	0	0.00239679	14.4681
ENSMUSG00000089713.1	antisense	chr1:178898582-178917614	113	133	94	6	9	13	6.46747	7.41778	5.35153	0.319404	0.368219	0.645429	0.000595103	14.4306
2010300C02Rik	protein_coding	chr1:37611676-37720090	12	7	4	0	1	1	0.302237	0.171803	0.100212	0	0.0180042	0.0218482	0.0402266	14.4095
Gas6	protein_coding	chr8:13465374-13494535	18150	17998	19284	1517	1653	1414	1205.86	1165.23	1274.42	93.7429	78.5055	81.4927	3.92718e-06	14.367
Ccdc80	protein_coding	chr16:45093407-45127924	30146	29915	29618	2311	2902	2310	1260.23	1218.64	1231.6	89.8572	86.7211	83.7686	8.13325e-08	14.252
Popdc2	protein_coding	chr16:38362160-38378216	88	70	82	10	8	2	6.71697	5.20662	6.22586	0.709943	0.436504	0.132425	0.000291518	14.1918
Adgrl4	protein_coding	chr3:151437882-151545081	60	57	56	3	7	5	2.51741	2.33048	2.33715	0.117073	0.209947	0.18198	4.93742e-06	14.116
Acta2	protein_coding	chr19:34240336-34255585	101794	110001	102844	7932	9494	9117	6187.92	6516.07	6218.65	448.475	412.553	480.755	6.52434e-07	14.1026
Pawr	protein_coding	chr10:108332189-108414391	2502	2455	2522	198	215	218	235.794	225.457	236.421	17.3558	14.4841	17.8218	5.18188e-07	14.0485
Map3k7cl	protein_coding	chr16:87553330-87595336	806	823	736	63	71	66	70.8799	70.5268	64.3814	5.15302	4.46328	5.03479	7.30834e-06	14.0459
1810011H11Rik	protein_coding	chr14:32785901-32817969	20	30	18	1	3	2	2.24317	3.27883	2.00816	0.104319	0.240525	0.194586	0.00403105	13.9595
Timp3	protein_coding	chr10:86300412-86349505	85174	84908	85903	6695	8531	6779	3134.66	3045.08	3144.75	229.175	224.435	216.421	8.95711e-08	13.9165
Apoc2	protein_coding	chr7:19671579-19677941	4	4	5	1	0	0	0.847602	0.825959	1.05389	0.19709	0	0	0.000999341	13.8386
Wisp2	protein_coding	chr2:163820752-163833146	17144	17699	16808	1538	1474	1396	1433.73	1442.35	1398.19	119.631	88.1171	101.272	1.39126e-07	13.8317
Fhod3	protein_coding	chr18:24708449-25133507	28	29	17	0	5	2	0.749604	0.756552	0.452707	0	0.0956867	0.0464465	0.00431458	13.7819
Ano5	protein_coding	chr7:51510017-51598707	6	9	9	0	0	2	0.117061	0.171108	0.174662	0	0	0.0338486	0.00278722	13.6736
Grik1	protein_coding	chr16:87895897-88290601	22	27	17	1	3	2	0.617876	0.73894	0.474922	0.0261223	0.0602292	0.0487257	0.00182586	13.5607
Mylk	protein_coding	chr16:34745199-35002436	4406	4066	4264	335	452	341	92.4311	83.1204	88.9785	6.53659	6.77828	6.20551	7.35549e-06	13.5515
Tnni3k	protein_coding	chr3:154786291-155055407	78	63	86	2	11	8	4.33886	3.41498	4.75855	0.103477	0.437403	0.38603	0.000709586	13.499
Pgr	protein_coding	chr9:8893175-8968611	532	489	447	40	38	50	6.04076	5.41072	5.04872	0.422447	0.30844	0.492492	6.58769e-05	13.4874
Nppb	protein_coding	chr4:147985773-147987205	22	14	14	4	0	0	4.28254	2.65567	2.71083	0.724223	0	0	0.00707257	13.3233
Gm35636	lncRNA	chr10:86156131-86189543	5	14	12	0	2	1	0.103444	0.282246	0.24695	0	0.0295782	0.0179466	0.0243661	13.3118
ENSMUSG00000085838.1	antisense	chr2:73658270-73660263	21	42	41	1	1	7	5.68833	11.0862	11.047	0.251941	0.19363	1.6448	0.00984352	13.3094
Hmgcs2	protein_coding	chr3:98280431-98310738	9	11	11	1	2	0	0.470697	0.560607	0.57225	0.0486443	0.0747715	0	0.000221505	12.9931
Serpinb9b	protein_coding	chr13:33027414-33040559	1721	1590	2022	127	200	168	153.619	138.302	179.532	10.5439	12.7615	13.0084	0.000273798	12.9827
A930028N01Rik	lncRNA	chr19:40297820-40299552	10	13	10	1	1	1	3.02237	3.82875	3.00637	0.281113	0.21605	0.262178	0.000369258	12.9816
Dcaf12l1	protein_coding	chrX:44786567-44790197	314	266	262	22	29	27	15.3068	12.6358	12.7043	0.997497	1.01056	1.14174	0.000142898	12.9046
Pappa	protein_coding	chr4:65124174-65357512	4195	3791	3544	392	362	321	65.5208	57.6989	55.0599	5.69463	4.04169	4.34912	6.70042e-05	12.657
Hrct1	protein_coding	chr4:43727198-43728110	112	122	104	14	13	5	21.1334	22.4325	19.52	2.45704	1.75349	0.81841	3.67751e-05	12.5446
Smoc1	protein_coding	chr12:81026808-81186414	7958	8210	7975	766	735	771	365.104	367.048	363.947	32.6869	24.105	30.6843	2.66693e-08	12.5302
Ntn4	protein_coding	chr10:93641049-93745972	3825	3814	3734	292	456	349	273.311	265.566	265.396	19.4062	23.2915	21.6322	1.05778e-07	12.5023
Kcnmb4	protein_coding	chr10:116417861-116473542	7	8	5	0	1	1	0.496879	0.553362	0.353035	0	0.0507411	0.0615747	0.00234362	12.494
Col15a1	protein_coding	chr4:47207627-47313167	4909	5604	4556	453	598	398	146.823	163.33	135.543	12.6018	12.7852	10.326	7.25943e-05	12.4799
Mag	protein_coding	chr7:30899175-30914921	3	4	2	0	1	0	0.195767	0.254358	0.12982	0	0.0466472	0	0.0105277	12.4326
ENSMUSG00000103703.2	TEC	chr3:67476978-67478818	3	4	2	0	1	0	0.280731	0.36475	0.186163	0	0.0668923	0	0.0105277	12.4326
Mgp	protein_coding	chr6:136872435-136875805	13966	16969	13608	1194	1804	1347	4016.68	4755.74	3893	319.398	370.885	336.057	0.000135854	12.3404
Gdf6	protein_coding	chr4:9844372-9862345	540	640	602	38	74	63	26.3388	30.4192	29.2074	1.72392	2.58013	2.66558	2.96995e-05	12.3343
Scel	protein_coding	chr14:103513061-103613346	1288	1085	1431	130	105	127	63.4335	52.0714	70.103	5.95496	3.69657	5.4257	0.000430748	12.3105
Npr3	protein_coding	chr15:11839896-11907371	7160	6052	6854	539	838	594	145.527	119.866	138.57	10.1895	12.1754	10.4729	8.7198e-05	12.3018
5430427O19Rik	protein_coding	chrX:85776968-85891499	11	7	13	1	1	1	0.44526	0.276112	0.52343	0.037649	0.0289353	0.0351132	0.00643931	12.2402
Gm19522	lncRNA	chr16:42884370-42912070	20	22	30	1	2	4	1.36186	1.45979	2.03197	0.0633337	0.0973508	0.236271	0.00232405	12.2271
Megf6	protein_coding	chr4:154170713-154275721	43	41	54	3	7	4	1.02417	0.9516	1.27936	0.0664597	0.119182	0.0826444	0.000585177	12.1331
Hey1	protein_coding	chr3:8663359-8667038	48	58	70	5	9	4	3.41985	4.02681	4.96088	0.331336	0.45837	0.247215	0.00110996	11.9657
Hist1h4m	protein_coding	chr13:21811746-21812150	29	45	36	3	4	4	12.3357	18.6529	15.2323	1.18692	1.21628	1.47597	0.00151496	11.9152
Fgf14	protein_coding	chr14:123973845-124677667	161	139	125	19	15	8	1.74552	1.46852	1.34804	0.191595	0.116251	0.0752381	0.0003411	11.9088
C1qb	protein_coding	chr4:136880145-136886177	551	571	501	38	67	60	89.3819	90.2611	80.8407	5.73343	7.76927	8.44303	1.395e-05	11.8694
Igfbp2	protein_coding	chr1:72824480-72852474	4921	5974	4506	490	562	491	597.86	707.258	544.543	55.3701	48.8079	51.746	0.000297245	11.8626
4930429B21Rik	lncRNA	chr3:32365489-32367438	185	209	179	18	24	16	16.344	17.9929	15.7302	1.47909	1.51568	1.22619	2.34408e-05	11.8616
Col6a3	protein_coding	chr1:90766860-90843971	21912	21919	21305	2173	2352	2033	348.205	339.422	336.767	32.1178	26.7176	28.0246	1.33803e-07	11.7936
Hoxc13	protein_coding	chr15:102921131-102928814	102	90	92	7	11	11	7.22238	6.20997	6.47982	0.461011	0.556776	0.675651	3.95274e-05	11.7584
Dscam	protein_coding	chr16:96587452-97170735	5	2	4	1	0	0	0.0707495	0.0275772	0.0562999	0.0131609	0	0	0.0246152	11.7489
Adamtsl2	protein_coding	chr2:27079340-27108613	10	6	6	2	0	0	0.515794	0.301574	0.307838	0.0959486	0	0	0.0113541	11.7272
ENSMUSG00000091993.2	antisense	chr1:171500568-171504111	24	12	19	1	4	1	1.16665	0.568429	0.918707	0.0452128	0.138994	0.0421675	0.0101336	11.723
ENSMUSG00000111283.1	processed_transcript	chr9:43993984-44000673	4	4	3	1	0	0	0.197563	0.192519	0.147388	0.0459387	0	0	0.00176983	11.6997
Omd	protein_coding	chr13:49579754-49592612	41	37	69	4	5	6	1.39315	1.22513	2.33216	0.126418	0.121448	0.176854	0.0119303	11.6558
Gm30476	lncRNA	chr17:73035998-73037811	13	23	13	2	2	1	3.38816	5.84138	3.37022	0.484824	0.372613	0.226084	0.00960538	11.6285
Pkia	protein_coding	chr3:7366604-7445366	2139	1681	1971	173	198	221	97.3313	74.5377	89.2119	7.32185	6.44042	8.72335	0.000288927	11.611
Cys1	protein_coding	chr12:24665833-24681819	216	231	238	18	34	20	14.0792	14.6725	15.4311	1.09127	1.58421	1.13085	5.75977e-06	11.6077
Gm34630	lncRNA	chr18:5389802-5402870	4	6	9	1	1	0	0.469095	0.685675	1.04988	0.109077	0.0838317	0	0.0177733	11.4284
Lfng	protein_coding	chr5:140607341-140615545	299	349	251	23	39	33	22.5526	25.6518	18.8319	1.61357	2.1028	2.15918	0.000500928	11.4094
Gm42005	lncRNA	chr5:113875130-113877529	10	13	6	1	1	1	0.746426	0.945576	0.445484	0.0694256	0.0533573	0.0647494	0.0110813	11.398
Tcf23	protein_coding	chr5:30968601-30988062	14	9	14	1	2	1	0.542721	0.339983	0.539847	0.0360563	0.0554225	0.0336277	0.00304146	11.3707
Klhdc8a	protein_coding	chr1:132298484-132307357	115	143	150	6	23	16	4.49142	5.44237	5.82735	0.217956	0.642127	0.542069	0.000329325	11.2407
Neb	protein_coding	chr2:52136640-52338798	468	442	471	53	51	42	3.40332	3.13218	3.40701	0.358481	0.265115	0.264945	6.14881e-06	11.1897
Ramp1	protein_coding	chr1:91179822-91225196	170	173	149	23	19	10	4.22791	4.19266	3.68602	0.532032	0.337783	0.215738	4.9465e-05	11.1525
Akap5	protein_coding	chr12:76324401-76334517	133	110	120	11	9	18	2.98419	2.4051	2.67824	0.229562	0.144353	0.350345	0.000160647	11.139
Gm11841	pseudogene	chr4:12125090-12127449	3	3	2	0	1	0	0.218994	0.213402	0.145223	0	0.0521817	0	0.00398967	11.0694
Gm20755	lncRNA	chr3:37898813-37992728	3	3	2	0	1	0	0.282882	0.275659	0.187589	0	0.0674049	0	0.00398967	11.0694
Gm40011	protein_coding	chr2:173082780-173138200	2	4	2	0	1	0	0.0811279	0.158113	0.0806984	0	0.0289966	0	0.0242741	11.0337
Scube2	protein_coding	chr7:109798690-109865679	5	6	9	1	0	1	0.241756	0.282699	0.432856	0.0449717	0	0.0419427	0.00836664	11.0144
Cemip	protein_coding	chr7:83932857-84086693	63273	60884	65990	6991	6834	6582	923.055	865.524	957.595	94.8596	71.2675	83.2946	7.31285e-06	11.0102
Hes1	protein_coding	chr16:30065357-30067796	777	731	665	56	107	79	77.3744	70.935	65.8707	5.18677	7.61671	6.82422	4.47601e-05	10.9121
Gm32210	lncRNA	chr2:117704951-117758393	9	6	4	0	0	2	3.1772	2.06405	1.40461	0	0	0.612466	0.0224256	10.851
E130310I04Rik	lncRNA	chr16:34943175-34958994	27	31	30	2	5	3	1.23873	1.38593	1.36908	0.0853445	0.16398	0.119394	1.9997e-05	10.8314
C1qa	protein_coding	chr4:136895916-136898844	353	329	355	19	65	36	56.2043	51.0455	56.2235	2.81373	7.39803	4.97218	2.21187e-05	10.7662
Mcam	protein_coding	chr9:44134581-44142727	1472	1523	1378	141	188	159	80.6324	81.2958	75.0837	7.18379	7.36151	7.55524	3.43074e-06	10.7243
Angpt2	protein_coding	chr8:18690263-18741562	1642	1677	1598	171	185	189	79.4595	79.081	76.9208	7.69664	6.39958	7.93384	1.7007e-07	10.6882
Nalcn	protein_coding	chr14:123276634-123627370	3	4	3	1	0	0	0.0658964	0.0856183	0.0655475	0.0204302	0	0	0.00232014	10.6246
Asb2	protein_coding	chr12:103321142-103356001	110	90	103	12	7	14	7.04471	5.61668	6.56148	0.7148	0.320461	0.777764	0.000196227	10.6026
Nov	protein_coding	chr15:54745928-54753762	3693	3877	3540	385	498	372	268.898	275.087	256.393	26.0736	25.9206	23.4963	1.67778e-06	10.6024
ENSMUSG00000110884.1	lincRNA	chr9:102771495-102790260	26	22	26	5	2	1	2.58911	2.13484	2.5754	0.463105	0.142368	0.0863825	0.000315239	10.5504
Tnnt2	protein_coding	chr1:135836315-135852268	30	32	30	2	1	7	3.96338	4.11966	3.9424	0.245758	0.0944392	0.802218	8.2577e-05	10.5263
Myl9	protein_coding	chr2:156775413-156781657	11591	12927	11687	1280	1421	1385	1712.56	1861.18	1717.6	175.9	150.081	177.51	5.52895e-06	10.5093
Casp14	protein_coding	chr10:78711995-78718347	18	24	16	0	4	3	1.30019	1.68932	1.1496	0	0.206539	0.187977	0.00199107	10.4916
Gm15867	lncRNA	chr1:192854928-192856856	66	51	49	4	12	4	11.4503	8.62204	8.45598	0.645455	1.4882	0.601981	0.00105873	10.4284
A330033J07Rik	lncRNA	chr13:48044231-48262623	9	10	8	2	1	0	0.550595	0.596151	0.486827	0.113803	0.0437318	0	0.000428029	10.3696
Gm536	misc_RNA	chr16:31617868-31638979	21	11	15	1	5	0	0.750109	0.382882	0.532956	0.0332229	0.127668	0	0.0114227	10.3545
Tmem190	protein_coding	chr7:4781766-4784341	9	7	8	0	2	1	0.97637	0.740008	0.86329	0	0.155099	0.0941069	0.000686645	10.3515
Kirrel3	protein_coding	chr9:34485848-35036315	47	31	60	5	6	5	1.37656	0.884761	1.74801	0.136207	0.125619	0.127033	0.00848103	10.3105
ENSMUSG00000103881.1	TEC	chr3:5212838-5215216	2	3	4	0	0	1	0.14483	0.211698	0.288126	0	0	0.062817	0.0139109	10.2624
Nptx2	protein_coding	chr5:144545887-144557478	425	424	414	36	75	41	28.7013	27.9026	27.8104	2.26124	3.6206	2.40185	1.02301e-06	10.1904
Slc6a7	protein_coding	chr18:60995376-61014199	15	21	9	3	1	1	0.301286	0.411029	0.179814	0.0560456	0.014358	0.0174235	0.0170117	10.1578
Gm35254	lncRNA	chr8:61627808-61631325	27	27	27	0	5	5	1.37902	1.34381	1.37172	0	0.182551	0.221526	5.8557e-05	10.1331
Myh14	protein_coding	chr7:44605803-44670843	35	32	13	1	6	3	0.858799	0.765139	0.317294	0.0228221	0.10524	0.0638549	0.0259396	10.1149
Hsp25-ps1	pseudogene	chr13:45078370-45079184	16	26	13	1	5	1	3.38209	5.35556	2.7334	0.196606	0.755514	0.183364	0.0131633	10.1023
Gm32647	lncRNA	chr7:94042496-95326426	5	3	8	0	1	1	0.598177	0.349742	0.952016	0	0.0855199	0.103779	0.0325968	10.0367
Gm36099	lncRNA	chr13:33030407-33034704	63	68	53	3	13	7	3.96541	4.17084	3.31832	0.175631	0.584923	0.382204	0.000262745	10.0236
Fam222a	protein_coding	chr5:114568251-114613220	5	5	6	0	1	1	0.26134	0.254667	0.311947	0	0.0373631	0.0453403	0.000406645	10.0111
Gm30440	lncRNA	chr7:83970181-84024735	20	33	24	4	3	2	0.707641	1.13779	0.844673	0.131636	0.0758772	0.061385	0.00329703	10.0042
Ackr4	protein_coding	chr9:104097682-104126643	93	71	43	11	6	7	2.79511	2.07942	1.28552	0.307498	0.128907	0.1825	0.013633	9.95315
Angpt4	protein_coding	chr2:151911332-151944654	613	532	598	78	77	53	69.0226	58.3726	66.9772	8.1688	6.19768	5.17674	6.6327e-05	9.94577
Gm12426	lncRNA	chr4:47199114-47209308	21	26	25	6	1	1	0.452222	0.545598	0.535509	0.120176	0.0153936	0.0186802	0.00053407	9.94058
ENSMUSG00000030623.4	antisense	chr7:89510007-89511873	4855	5477	5089	559	732	573	761.051	836.631	793.509	81.5022	82.0244	77.9164	5.22883e-06	9.90375
Npy6r	protein_coding	chr18:44270127-44277700	17	12	11	2	3	0	1.14089	0.784774	0.734317	0.124842	0.143921	0	0.00419367	9.89714
Dlx5	protein_coding	chr6:6877801-6882068	45	53	64	8	5	6	3.61416	4.14799	5.11293	0.59761	0.28706	0.418019	0.000997593	9.88346
Adamtsl3	protein_coding	chr7:82335393-82614450	1781	1873	1749	195	249	210	40.1599	41.156	39.2296	4.08975	4.01362	4.10769	3.3903e-07	9.87183
Igfbp4	protein_coding	chr11:99041260-99052646	22123	22779	23441	2683	3300	2303	1842.07	1848.26	1941.48	207.786	196.419	166.343	1.04017e-06	9.87088
Rerg	protein_coding	chr6:137054825-137170496	108	128	149	10	24	14	8.04397	9.29016	11.0389	0.692755	1.27781	0.904533	0.000657952	9.86857
Ankrd35	protein_coding	chr3:96670131-96691034	15	14	10	1	3	1	0.531604	0.483494	0.352526	0.0329632	0.0760021	0.030743	0.00180156	9.78914
Gm26705	lncRNA	chr7:99260481-99267218	28	16	33	1	6	3	3.31071	1.84353	3.88125	0.109975	0.507133	0.307704	0.0119018	9.77007
S100a3	protein_coding	chr3:90560356-90602706	21	26	38	4	2	4	0.896599	1.08173	1.61383	0.158844	0.0610403	0.148145	0.0077709	9.7605
Tcf21	protein_coding	chr10:22817263-22820128	10	22	14	1	4	1	1.39044	2.98085	1.9363	0.129325	0.397575	0.120615	0.0165515	9.74123
Kprp	protein_coding	chr3:92823074-92827247	75	97	92	7	9	16	4.73457	5.96702	5.77699	0.411008	0.406134	0.87617	0.000284106	9.73157
Gdap1	protein_coding	chr1:17145373-17164271	47	31	49	5	8	3	2.0561	1.32152	2.13225	0.203446	0.250175	0.113846	0.00324724	9.70959
Slc22a2	protein_coding	chr17:12583958-12628488	3	2	2	0	1	0	0.195323	0.126891	0.129526	0	0.0465415	0	0.00771009	9.70618
Gm8615	transcribed_pseudogene	chr5:149154128-149156192	2	2	3	0	1	0	0.166852	0.162592	0.248953	0	0.0596362	0	0.0073683	9.69877
Gm33053	lncRNA	chr9:59191151-59235060	2	2	3	0	1	0	0.271513	0.26458	0.405113	0	0.0970439	0	0.0073683	9.69877
Pmp2	protein_coding	chr3:10179851-10183885	13	19	20	0	5	2	1.64192	2.33845	2.51265	0	0.451425	0.219123	0.00280586	9.68316
Mir3109	miRNA	chr9:69456944-69457031	3	3	1	0	1	0	5.87301	5.72305	1.94731	0	1.39942	0	0.0414503	9.67787
Tnfsf14	protein_coding	chr17:57189474-57194181	3	3	1	0	1	0	0.276525	0.269464	0.091687	0	0.0658902	0	0.0414503	9.67787
Gm39664	lncRNA	chr1:74030951-74032927	9	8	9	1	0	2	0.828246	0.71742	0.82386	0.0855952	0	0.15966	0.00027009	9.66147
Kcna5	protein_coding	chr6:126532551-126535555	37	46	34	5	3	6	2.12119	2.56982	1.93888	0.266613	0.122944	0.298386	0.000529904	9.63727
A730089K16Rik	misc_RNA	chr5:76655374-76658423	9	6	3	2	0	0	0.508353	0.330248	0.168554	0.105072	0	0	0.0447447	9.58541
Gm39549	lncRNA	chrX:167160158-167170088	63	91	89	9	15	7	43.4133	61.1069	61.0052	5.76843	7.38892	4.18437	0.00115222	9.54493
Rdm1	protein_coding	chr11:101627242-101636089	29	16	11	1	2	4	1.95998	1.05375	0.739503	0.0628616	0.0966251	0.23451	0.038802	9.52604
Stk32b	protein_coding	chr5:37446825-37717153	29	32	26	5	5	1	1.45232	1.56164	1.29519	0.232899	0.178995	0.0434424	0.000178082	9.46365
Gipc2	protein_coding	chr3:152093839-152165900	76	91	59	17	5	5	9.80742	11.4432	7.57334	2.04044	0.461231	0.559707	0.00223002	9.41538
Jph3	protein_coding	chr8:121730559-121791083	7	13	14	0	5	0	0.308974	0.559157	0.614676	0	0.157762	0	0.0148545	9.39904
Cd180	protein_coding	chr13:102693558-102706631	161	143	169	20	28	13	11.9245	10.3208	12.4507	1.37777	1.48244	0.835229	0.000103855	9.38887
ENSMUSG00000087340.1	lincRNA	chrX:167164097-167171278	132	105	134	6	27	17	6.61056	5.12413	6.67519	0.279478	0.966574	0.73852	0.000553655	9.27649
Gm11744	protein_coding	chr11:116653889-116668389	25	22	10	5	2	0	2.51864	2.15981	1.00212	0.468521	0.144034	0	0.024155	9.27358
Sorbs1	protein_coding	chr19:40292040-40513874	6676	6165	6536	758	935	806	70.7585	63.674	68.9079	7.47247	7.08404	7.41048	9.08014e-06	9.25663
Gm31735	lncRNA	chr7:29970602-29983761	11	29	13	3	4	0	1.14711	2.94698	1.3485	0.290982	0.298181	0	0.0488086	9.23783
Slc16a4	protein_coding	chr3:107291230-107312115	117	104	110	6	19	19	7.9168	6.85747	7.40374	0.377614	0.91902	1.11524	6.29945e-05	9.19536
Podn	protein_coding	chr4:108014793-108032090	657	771	597	109	81	68	24.1951	27.6683	21.8691	3.73355	2.13233	2.1723	0.000242904	9.17279
Aoc3	protein_coding	chr11:101330606-101339430	2481	2350	2573	324	375	272	92.3141	85.2071	95.2304	11.2129	9.97425	8.7793	1.21223e-05	9.10189
Prss23	protein_coding	chr7:89507785-89527238	31253	29858	32198	3640	4854	3828	1377.01	1281.96	1411.14	149.169	152.881	146.308	6.2902e-06	9.0778
Gm38623	lncRNA	chr9:113719250-113741054	18	8	8	0	4	1	1.0068	0.436042	0.445099	0	0.159933	0.04852	0.0451631	9.05691
Dcc	protein_coding	chr18:71253613-72351240	12	23	15	0	4	3	0.196605	0.367204	0.244455	0	0.0468469	0.0426367	0.0106275	9.03254
B4galnt3	protein_coding	chr6:120200753-120295023	15	21	8	1	3	2	0.382777	0.522204	0.203067	0.0237349	0.0547247	0.0442725	0.024046	9.02819
ENSMUSG00000111521.1	antisense	chr9:45930227-45933738	3184	4316	2944	447	543	391	789.243	1042.52	725.889	103.057	96.2155	84.0744	0.00144037	9.02658
Hspb7	protein_coding	chr4:141420779-141425310	3043	3385	3010	379	460	410	189.391	205.297	186.345	21.9396	20.4655	22.1355	8.20753e-06	9.00259
Ldb3	protein_coding	chr14:34526699-34590323	475	467	471	55	71	62	13.3318	12.7726	13.1496	1.43579	1.4245	1.50951	2.53729e-07	8.98301
Gm40240	lncRNA	chr4:123897862-123901214	9	13	10	1	0	3	1.49949	2.11063	1.65728	0.154965	0	0.433583	0.00219216	8.94982
Mamdc2	protein_coding	chr19:23302609-23448498	400	428	446	53	42	71	18.8382	19.6422	20.8934	2.3216	1.41395	2.90059	1.84248e-05	8.94701
Gm11549	lncRNA	chr3:36515057-36521445	5	8	11	1	0	2	0.35001	0.545717	0.765946	0.0651094	0	0.121448	0.0171226	8.90704
Myo10	protein_coding	chr15:25622550-25813671	11645	11681	10644	1428	1656	1464	208.626	203.927	189.683	23.7952	21.2078	22.7519	6.44038e-06	8.88843
Bok	protein_coding	chr1:93685575-93695770	937	993	845	131	121	117	103.542	106.928	92.8811	13.4642	9.55805	11.2153	3.36022e-05	8.86019
ENSMUSG00000109904.1	TEC	chr7:110119990-110121740	59	82	54	9	9	8	5.80481	7.86171	5.28475	0.823591	0.632975	0.682772	0.00207399	8.85848
Fbxl22	protein_coding	chr9:66508459-66514593	142	128	101	11	17	22	6.21679	5.46078	4.39839	0.447923	0.532028	0.835506	0.000921245	8.85505
Matn3	protein_coding	chr12:8947929-8972028	29	35	27	6	4	2	1.65759	1.94946	1.5351	0.31898	0.163436	0.099165	0.000398659	8.84168
Chrna2	protein_coding	chr14:66133238-66152948	5	5	11	1	2	0	0.206565	0.20129	0.452037	0.0384255	0.0590641	0	0.0396588	8.82034
Arxes1	protein_coding	chrX:136033367-136034946	30	30	32	2	7	4	3.27105	3.18752	3.47064	0.202828	0.545596	0.378333	2.2678e-05	8.8122
Arc	protein_coding	chr15:74669081-74672570	70	85	82	10	6	15	3.94222	4.66475	4.59358	0.523813	0.241547	0.732797	0.000134201	8.8112
Itgbl1	protein_coding	chr14:123659936-123974080	940	1032	966	122	142	133	63.2079	67.6223	64.6123	7.6302	6.82557	7.7579	1.70521e-06	8.79829
Wnt2	protein_coding	chr6:17985474-18032751	35	52	61	9	8	3	1.05542	1.52802	1.82971	0.252426	0.172447	0.0784746	0.00484896	8.76761
Rcan2	protein_coding	chr17:43801281-44039516	3358	3190	3237	426	466	440	136.342	126.214	130.733	16.0876	13.5252	15.4971	2.7753e-06	8.71846
Gm36129	lncRNA	chr12:24679276-24700973	12	15	11	2	1	2	0.34455	0.41969	0.314165	0.0534114	0.0205248	0.0498139	0.000650352	8.71438
ENSMUSG00000101859.1	lincRNA	chr2:118123451-118124047	426	767	418	71	71	76	261.171	458.224	254.91	40.4862	31.1159	40.4184	0.0126334	8.69757
Dkk2	protein_coding	chr3:132085243-132180304	124	118	129	20	10	19	5.63198	5.22262	5.82806	0.844895	0.324674	0.748588	3.31064e-05	8.69724
Gm31672	lncRNA	chr4:154026221-154056559	11	6	13	2	1	1	0.573902	0.305045	0.674657	0.0970528	0.0372952	0.0452579	0.0149367	8.65007
Hist1h3b	protein_coding	chr13:23752380-23752840	13	12	25	2	3	2	4.85808	4.36988	9.293	0.695159	0.801402	0.648337	0.0252547	8.63489
Nebl	protein_coding	chr2:17343030-17731068	30	35	36	4	11	0	0.478852	0.544396	0.57158	0.0593845	0.125511	0	0.000496252	8.62559
Atp1b1	protein_coding	chr1:164437099-164458355	488	402	429	66	68	48	32.4596	26.0565	28.3841	4.08319	3.23325	2.76958	0.000179217	8.6159
Arl4d	protein_coding	chr11:101665541-101667832	84	58	82	8	10	13	10.4711	7.04545	10.1677	0.92755	0.891091	1.40575	0.00181259	8.58591
Crip1	protein_coding	chr12:113152012-113153879	1308	1804	1399	166	262	205	504.107	677.514	536.324	59.5053	72.1811	68.5359	0.000691753	8.58018
Nudt10	protein_coding	chrX:6168696-6173044	10	7	9	0	3	1	0.795728	0.542787	0.712363	0	0.170645	0.0690262	0.00250807	8.55705
Mustn1	protein_coding	chr14:30879257-30881610	2020	2422	2307	286	322	329	295.162	344.865	335.313	38.8694	33.6335	41.7017	4.88932e-05	8.54029
Apoc4-apoc2	protein_coding	chr7:19671579-19681460	3	2	3	1	0	0	0.802524	0.521355	0.798275	0.248811	0	0	0.00743482	8.52918
Fbxw24	protein_coding	chr9:109601116-109626059	12	10	10	0	4	1	1.38745	1.12669	1.15009	0	0.330601	0.100296	0.00110599	8.50371
Rasl11b	protein_coding	chr5:74195326-74199477	608	767	608	69	118	95	59.2439	72.8286	58.9303	6.25349	8.2192	8.02996	0.000263591	8.48802
Bmp4	protein_coding	chr14:46383525-46390669	1156	1168	1271	141	213	157	87.0411	85.699	95.1933	9.87458	11.4645	10.2545	1.25792e-05	8.48064
Egr4	protein_coding	chr6:85511122-85513542	18	22	16	1	3	4	1.47664	1.7587	1.30562	0.076302	0.175927	0.284651	0.000776999	8.45808
Fam46b	protein_coding	chr4:133480133-133487940	492	554	496	50	83	87	37.0452	40.6483	37.1486	3.50162	4.46737	5.68244	1.48672e-05	8.41246
Limch1	protein_coding	chr5:66745840-67057159	314	323	292	45	41	44	4.25471	4.26491	3.93566	0.567134	0.397129	0.517181	6.73646e-06	8.40753
Gm24576	lncRNA	chr7:15946197-15947790	554	538	605	80	65	92	66.5554	62.9828	72.2975	8.93915	5.58206	9.58761	3.79554e-05	8.37186
Gdf10	protein_coding	chr14:33923587-33935285	81	108	112	8	20	16	5.55505	7.21761	7.64039	0.5103	0.980483	0.951858	0.000790668	8.35695
Ppfia2	protein_coding	chr10:106470270-106933468	11	10	7	0	1	3	0.276687	0.24511	0.175141	0	0.0179805	0.0654585	0.00464418	8.35266
Gm36500	lncRNA	chr13:34130570-34138468	2	1	3	0	1	0	0.0761942	0.0371243	0.113686	0	0.0272332	0	0.0494712	8.33557
Gm33771	lncRNA	chr7:130374768-130382948	4	3	5	0	2	0	0.12714	0.0929204	0.158084	0	0.0454423	0	0.0101017	8.32142
Olfm2	protein_coding	chr9:20667691-20746307	175	184	181	25	27	25	12.8072	13.122	13.1762	1.70172	1.4125	1.5871	1.42851e-07	8.31795
Wsb2-ps	pseudogene	chr11:62749031-62751346	3	2	1	0	1	0	0.223154	0.144971	0.0739909	0	0.053173	0	0.0496503	8.31467
Lrrc2	protein_coding	chr9:110951545-110984066	2	2	2	0	1	0	0.0839752	0.0818309	0.0835306	0	0.0300143	0	0.00188039	8.30726
ENSMUSG00000108276.1	antisense	chr6:135289359-135341684	2	2	2	0	1	0	0.0580637	0.0565811	0.0577563	0	0.0207531	0	0.00188039	8.30726
Gm31095	lncRNA	chr3:54359662-54361006	2	2	2	0	1	0	0.508937	0.495941	0.506242	0	0.181904	0	0.00188039	8.30726
Gldn	protein_coding	chr9:54286486-54341777	213	234	222	27	46	25	7.89301	8.44978	8.18296	0.930593	1.21851	0.803623	3.73589e-06	8.30615
Adra1d	protein_coding	chr2:131545357-131562285	2671	2597	2563	330	430	368	192.208	182.111	183.46	22.0874	22.1194	22.9718	8.5375e-07	8.30292
ENSMUSG00000073594.3	antisense	chr18:37008868-37020679	8	5	8	1	1	1	0.27736	0.168924	0.275891	0.0322468	0.0247834	0.0300748	0.00416764	8.29085
Lhx4	protein_coding	chr1:155698031-155751726	2	3	1	0	1	0	0.0603838	0.088263	0.0300321	0	0.0215823	0	0.0457817	8.27895
Gm5512	transcribed_pseudogene	chr19:12905231-12906993	2	3	1	0	1	0	0.195434	0.285666	0.0971996	0	0.0698518	0	0.0457817	8.27895
Aadat	protein_coding	chr8:60505868-60545677	16	18	7	0	2	4	1.31008	1.4362	0.570124	0	0.117062	0.28411	0.0262796	8.2668
Car8	protein_coding	chr4:8141493-8239041	67	95	80	13	9	12	2.0172	2.78718	2.39585	0.364041	0.193698	0.313405	0.000757794	8.26526
Cdk5r2	protein_coding	chr1:74855029-74857732	2	7	6	1	0	1	0.127422	0.434591	0.380243	0.0592582	0	0.0552669	0.0460413	8.22751
Hist1h2ab	protein_coding	chr13:23751088-23751592	16	16	18	2	1	4	5.45822	5.31885	6.10799	0.634591	0.243859	1.1837	0.000172896	8.1881
Fbxw18	protein_coding	chr9:109676732-109702700	19	12	11	3	2	1	1.70303	1.04813	0.980745	0.250105	0.128146	0.0777532	0.00982464	8.18392
Gm13749	lncRNA	chr1:63964727-63968999	15	13	18	6	0	0	1.80456	1.52402	2.154	0.671373	0	0	0.0051333	8.16622
Rims2	protein_coding	chr15:39198286-39684375	3	7	3	0	1	1	0.0366231	0.0832719	0.0364292	0	0.00872653	0.0105897	0.045531	8.0929
Vcl	protein_coding	chr14:20929378-21033676	26120	25729	24855	3318	4411	3628	819.491	786.612	775.674	96.8234	98.9272	98.7388	7.71715e-07	8.08782
Coro6	protein_coding	chr11:77462320-77470484	129	113	124	18	26	11	6.36411	5.43242	6.08505	0.82595	0.916915	0.47075	7.07432e-05	8.078
Dmpk	protein_coding	chr7:19083833-19093821	10790	11354	9969	1607	1579	1529	599.822	615.058	551.248	83.0902	62.7466	73.7323	1.37767e-05	8.04361
Tmem252	protein_coding	chr19:24674008-24679661	4	10	7	2	1	0	0.279895	0.681869	0.487222	0.130166	0.0500198	0	0.0257237	8.04162
Sprr1a	protein_coding	chr3:92483954-92485881	90	114	122	3	22	25	19.6263	24.2252	26.4636	0.608484	3.42946	4.72917	0.000950817	8.02033
Rnf183	protein_coding	chr4:62427536-62434726	3	2	2	0	0	1	0.365765	0.237617	0.242552	0	0	0.105762	0.0107846	7.99846
Mir337	miRNA	chr12:109585789-109585885	2	2	3	0	0	1	3.55206	3.46136	5.29989	0	0	1.54064	0.0103841	7.99236
Dhx58os	lncRNA	chr11:100673326-100688073	2	2	3	0	0	1	0.236967	0.230916	0.353569	0	0	0.10278	0.0103841	7.99236
Htr1d	protein_coding	chr4:136423522-136444405	6	6	3	2	0	0	0.291251	0.283814	0.144855	0.0902982	0	0	0.0203652	7.97269
Mcf2l	protein_coding	chr8:12873544-13020509	176	125	150	28	18	20	2.99077	2.06989	2.53546	0.442549	0.21865	0.294815	0.00127318	7.94561
Prnd	protein_coding	chr2:131950861-131956131	57	47	45	5	11	7	3.05719	2.45647	2.40079	0.249431	0.421742	0.325682	0.000435898	7.93941
F2r	protein_coding	chr13:95601789-95618433	13667	13965	13825	1923	2382	1939	714.346	711.284	718.778	93.4862	88.9989	87.9149	2.30051e-09	7.9305
Tagln	protein_coding	chr9:45929628-45936058	40444	45485	40608	5752	7469	5885	4393.12	4814.53	4387.58	581.127	579.948	554.517	9.74572e-06	7.92452
Fmod	protein_coding	chr1:134037515-134048277	4086	4181	4516	619	776	541	246.211	245.502	270.68	34.6922	33.4255	28.2784	1.28082e-05	7.90896
Slc16a12	protein_coding	chr19:34668401-34747823	12	6	7	0	2	2	0.418991	0.204146	0.243117	0	0.0499184	0.0605763	0.0214196	7.83978
Reln	protein_coding	chr5:21884454-22344705	41	54	72	10	8	7	0.603596	0.774681	1.05436	0.136929	0.0841899	0.0893943	0.00592167	7.83425
ENSMUSG00000113650.1	TEC	chr13:9753741-9756879	5	4	4	1	1	0	0.274411	0.213923	0.218366	0.0510463	0.0392318	0	0.00116511	7.82804
ENSMUSG00000097289.1	lincRNA	chr11:96712982-96747436	17	22	21	0	7	3	1.03414	1.30412	1.2707	0	0.304393	0.158307	0.00101428	7.79978
Abcc9	protein_coding	chr6:142587862-142702767	219	184	248	31	37	32	4.63777	3.79708	5.2241	0.610604	0.560111	0.587847	0.000665316	7.76711
Ptprb	protein_coding	chr10:116275513-116389538	558	444	469	70	66	87	7.4571	5.7821	6.23452	0.870095	0.630503	1.00857	0.000383037	7.76104
ENSMUSG00000097250.1	antisense	chr3:83773853-83789956	8	8	12	0	5	0	1.27375	1.24123	1.90051	0	0.569079	0	0.0110148	7.75902
Cryab	protein_coding	chr9:50751325-50756636	7809	8922	8931	1165	1513	1325	1005.45	1119.43	1143.83	139.516	139.256	147.99	2.45275e-05	7.65933
Nxph3	protein_coding	chr11:95509846-95514565	337	390	314	53	60	49	19.5411	22.0369	18.1111	2.85844	2.48702	2.46471	0.00011562	7.6425
Tpm2	protein_coding	chr4:43513726-43523583	16635	18631	16392	2468	3140	2492	854.187	932.251	837.252	117.871	115.257	111.001	1.31763e-05	7.62414
Chit1	protein_coding	chr1:134111242-134151541	11	10	6	3	1	0	0.99581	0.882166	0.540293	0.252603	0.0647129	0	0.0110214	7.62102
Rhoh	protein_coding	chr5:65861403-65896700	14	12	11	1	3	2	0.428089	0.357564	0.334574	0.0284406	0.0655744	0.05305	0.000424411	7.61723
Ror1	protein_coding	chr4:100095791-100444806	1741	1819	1761	276	273	276	27.6179	28.1185	27.7873	4.07225	3.09573	3.79797	1.97375e-07	7.61665
Atoh8	protein_coding	chr6:72206174-72235817	3074	3108	3030	437	589	426	192.572	189.731	188.811	25.4627	26.3762	23.1499	3.89257e-08	7.61599
Tgfbi	protein_coding	chr13:56609603-56639339	510	513	563	70	104	77	32.8082	32.1585	36.0259	4.18835	4.78247	4.29687	1.73646e-05	7.61192
Fzd6	protein_coding	chr15:39005669-39038194	176	146	136	23	16	31	5.99336	4.84482	4.60671	0.728481	0.38948	0.915733	0.000601451	7.5945
Gxylt2	protein_coding	chr6:100704290-100805686	224	264	240	52	29	30	13.4225	15.4154	14.3051	2.89815	1.2422	1.55939	8.39178e-05	7.56929
Cnr2	protein_coding	chr4:135895189-135920219	11	12	17	3	1	2	0.436944	0.464495	0.671702	0.110838	0.0283949	0.0689148	0.00426732	7.55782
Pparg	protein_coding	chr6:115360877-115490404	348	323	363	60	57	45	15.5719	14.0842	16.1571	2.49716	1.82324	1.74672	3.66725e-05	7.55105
Col10a1	protein_coding	chr10:34389981-34397085	306	309	255	27	80	37	16.8422	16.5731	13.9609	1.38221	3.14757	1.76656	0.000210023	7.52439
Ccdc148	protein_coding	chr2:58821697-59160660	4	5	3	0	1	1	0.0839343	0.102239	0.0626174	0	0.0149998	0.0182024	0.00487598	7.49318
Thbs1	protein_coding	chr2:118111876-118127133	395401	386005	389399	60524	68157	58754	11648	11080.9	11410.5	1658.35	1435.27	1501.42	6.28218e-07	7.42963
Nkain4	protein_coding	chr2:180934766-180954891	143	178	166	25	39	16	17.8259	21.6223	20.5834	2.89859	3.47525	1.73015	0.000154529	7.40764
Scx	protein_coding	chr15:76457092-76459468	50	70	52	8	12	8	4.50039	6.13967	4.65563	0.669736	0.772092	0.624626	0.00109382	7.40191
Nlrp1b	protein_coding	chr11:71153011-71242514	19	18	10	4	0	3	0.297918	0.275032	0.155969	0.0583359	0	0.0408051	0.0113275	7.35234
Gm36283	lncRNA	chr10:108436388-108453296	44	54	35	7	10	5	1.21867	1.45745	0.964261	0.180328	0.197988	0.12013	0.00191519	7.30344
Pcsk7	protein_coding	chr9:45906569-45932103	35253	38738	34912	5380	6982	5487	772.28	826.957	760.761	109.621	109.337	104.271	4.94942e-06	7.30132
Pamr1	protein_coding	chr2:102549931-102643041	1912	1800	1940	310	319	289	85.6448	78.5692	86.4389	12.9154	10.2144	11.2295	1.04114e-05	7.29506
Gm36847	lncRNA	chr7:105482644-105522672	5	7	6	0	1	2	0.504909	0.688824	0.602683	0	0.0721857	0.175195	0.00216621	7.26174
Scg2	protein_coding	chr1:79434669-79440090	79	125	87	16	20	12	5.47675	8.44448	5.99943	1.03169	0.991137	0.72165	0.00339216	7.25846
Myocd	protein_coding	chr11:65173608-65269989	153	130	121	17	20	29	3.1612	2.6174	2.4868	0.326695	0.295392	0.519766	0.000404027	7.23859
Svop	protein_coding	chr5:114026913-114091423	32	16	33	3	8	3	1.62332	0.790936	1.66519	0.14155	0.290103	0.132016	0.0154571	7.23732
Gm41616	lncRNA	chr17:73071627-73084583	57	48	48	13	10	2	5.43124	4.45689	4.54946	1.15213	0.681132	0.165312	0.000598609	7.22396
Tns1	protein_coding	chr1:73910231-74124529	35218	35169	32994	5745	5782	5501	499.645	486.209	465.614	75.8088	58.6384	67.6998	2.98089e-06	7.18026
Atp1a2	protein_coding	chr1:172271709-172298064	45	32	31	10	3	4	1.24496	0.862701	0.8531	0.257322	0.0593297	0.095996	0.00399418	7.17504
Gm35598	lncRNA	chr11:118422161-118428213	26	39	15	2	8	4	10.3684	15.1555	5.9501	0.741825	2.28053	1.38372	0.0286331	7.14332
Ckb	protein_coding	chr12:111669355-111672338	3188	3579	3173	518	589	552	371.592	406.515	367.885	56.1579	49.0762	55.8131	1.25637e-05	7.11588
Galnt15	protein_coding	chr14:32028657-32062204	19	26	37	3	6	5	0.488031	0.65078	0.945345	0.0716718	0.110167	0.111407	0.0113374	7.10718
Csrp1	protein_coding	chr1:135729197-135752229	12372	13362	12669	1955	2528	2017	1204.17	1267.32	1226.55	176.982	175.887	170.296	5.71462e-07	7.06861
ENSMUSG00000103217.1	antisense	chr2:25180781-25183339	8	7	4	1	0	2	0.671965	0.572956	0.334204	0.0781249	0	0.145726	0.0142039	7.05437
Rab3b	protein_coding	chr4:108879070-108943324	103	111	108	9	26	21	5.34468	5.61273	5.57446	0.43437	0.964418	0.945264	1.63594e-05	7.05269
Ptprz1	protein_coding	chr6:22875457-23052916	184	171	156	33	32	21	3.89849	3.53054	3.28774	0.650317	0.484659	0.385964	9.29236e-05	7.04615
Sox2	protein_coding	chr3:34649995-34652461	31	27	27	4	8	3	2.16479	1.83732	1.87548	0.259804	0.399347	0.181729	0.00015851	6.98979
Tspan2	protein_coding	chr3:102734770-102772310	955	748	867	121	178	145	37.7173	28.7876	34.0605	4.44483	5.02533	4.96769	0.000381531	6.9654
P2ry12	protein_coding	chr3:59216271-59263014	5	2	3	0	2	0	0.333092	0.129835	0.198797	0	0.0952426	0	0.0491387	6.94776
ENSMUSG00000103170.1	lincRNA	chr3:52198248-52200489	2	1	2	0	1	0	0.178154	0.0868026	0.177211	0	0.0636757	0	0.0270088	6.94406
B230317F23Rik	misc_RNA	chr8:60983304-60990502	2	1	2	0	1	0	0.0478608	0.0233194	0.0476074	0	0.0171064	0	0.0270088	6.94406
ENSMUSG00000113424.1	sense_intronic	chr13:30370359-30377183	2	1	2	0	1	0	0.187766	0.0914857	0.186772	0	0.067111	0	0.0270088	6.94406
Cd207	protein_coding	chr6:83671207-83677857	1	2	2	0	1	0	0.112598	0.219446	0.224004	0	0.0804894	0	0.0247703	6.90834
Hist1h1a	protein_coding	chr13:23763668-23764412	4	4	8	0	2	1	0.924967	0.901349	1.84014	0	0.330601	0.200593	0.0320136	6.9023
Myo18b	protein_coding	chr5:112688876-112896461	7	13	9	2	2	1	0.142511	0.257905	0.182258	0.0378715	0.0291063	0.0176603	0.00844026	6.88429
Slc18a1	protein_coding	chr8:69037708-69090633	9	5	4	0	0	3	0.342344	0.185335	0.151347	0	0	0.0989899	0.0456243	6.85955
Fbxw25	misc_RNA	chr9:109644869-109665347	7	6	5	0	0	3	0.530777	0.443335	0.377119	0	0	0.197326	0.00837906	6.8477
LOC108167857	protein_coding	chr11:57800735-57801973	44	53	31	3	5	14	14.6901	17.2431	10.2951	0.931594	1.1933	4.05462	0.00603933	6.83359
S100a4	protein_coding	chr3:90603770-90606045	9997	11532	11512	1526	2126	2153	2746.78	3087.64	3146.3	389.98	417.566	513.155	3.96568e-05	6.79996
Rspo2	protein_coding	chr15:43020788-43171595	1090	932	1123	169	181	198	45.3027	37.7468	46.4272	6.53307	5.37754	7.13859	0.000186407	6.79696
Insc	protein_coding	chr7:114743681-114850380	87	77	88	13	14	17	5.19873	4.48369	5.23064	0.722527	0.598017	0.881203	7.95512e-05	6.77328
LOC108167694	protein_coding	chr9:124422472-124423394	9	11	7	1	3	1	2.9932	3.56494	2.31572	0.309333	0.713217	0.288498	0.00285616	6.76852
Slc6a6	protein_coding	chr6:91684046-91759063	14088	14323	13885	2335	2655	2466	358.813	355.484	351.77	55.3145	48.3382	54.483	5.76e-08	6.74147
Synpo2	protein_coding	chr3:123076519-123236169	418	413	386	55	83	79	9.21918	8.87631	8.46833	1.12827	1.30858	1.51144	6.4985e-06	6.72792
Cygb	protein_coding	chr11:116645595-116654313	3732	4133	3648	670	759	608	274.522	296.256	266.922	45.8399	39.9103	38.7961	1.2523e-05	6.72602
BC039771	lncRNA	chr2:145701195-145753672	8	14	18	2	2	3	0.661325	1.12777	1.4801	0.153776	0.118185	0.215127	0.0177912	6.71171
Nuak1	protein_coding	chr10:84370900-84440471	3520	3670	3596	595	683	635	111.534	113.317	113.338	17.5353	15.47	17.4536	4.69152e-08	6.70226
ENSMUSG00000106025.1	TEC	chr3:116572063-116574424	20	8	12	3	2	2	1.45872	0.56859	0.870599	0.203515	0.104275	0.126538	0.0354723	6.67217
Dgkg	protein_coding	chr16:22466568-22657300	14	15	14	5	0	2	0.392938	0.410255	0.390857	0.130526	0	0.0486939	0.000932328	6.66246
Prrx2	protein_coding	chr2:30845064-30881251	1051	1245	1088	184	195	222	123.003	141.988	126.66	20.0293	16.3139	22.5381	5.34338e-05	6.65154
LOC108168426	lncRNA	chr19:36235979-36243323	77	86	91	10	23	14	25.8581	28.143	30.3977	3.12347	5.52129	4.07833	8.71253e-05	6.63351
Gm32950	lncRNA	chr3:28790639-28805420	3	3	6	1	0	1	0.218531	0.212951	0.434747	0.0677523	0	0.0631889	0.0324183	6.6154
Ap3b2	protein_coding	chr7:81460399-81494037	3	3	6	1	0	1	0.130019	0.126699	0.258661	0.0403105	0	0.0375954	0.0324183	6.6154
Foxs1	protein_coding	chr2:152931898-152933208	871	971	806	159	203	121	114.456	124.338	105.354	19.4334	19.0688	13.7929	7.28873e-05	6.58088
Tnfrsf11b	protein_coding	chr15:54250619-54278484	3370	3336	3290	500	764	569	206.021	198.735	200.065	28.4305	33.3874	30.1747	3.56189e-07	6.57467
Smad6	protein_coding	chr9:63953076-64022087	3149	3183	3087	520	720	493	180.892	178.176	176.391	27.7832	29.5655	24.5664	1.70201e-07	6.53675
Klhl30	protein_coding	chr1:91351073-91362404	90	56	73	12	20	9	5.13403	3.11294	4.14222	0.636692	0.815554	0.445356	0.00414001	6.52886
Gm10687	misc_RNA	chr9:44125258-44134485	12	10	7	1	0	4	12.8404	10.4271	7.45056	0.995244	0	3.71284	0.0105663	6.52453
4921513I03Rik	lncRNA	chr10:120765732-120778886	7	9	11	1	2	2	0.689494	0.863857	1.07775	0.0916148	0.140822	0.170888	0.00292604	6.52354
Gjb4	protein_coding	chr4:127340954-127354139	30	41	33	2	11	7	1.76391	2.34912	1.93003	0.109375	0.462333	0.357028	0.00110293	6.50675
Nedd9	protein_coding	chr13:41309916-41487360	2331	2227	2313	374	415	464	83.976	78.1807	82.8864	12.5319	10.6873	14.5004	5.00219e-06	6.49643
Adra1b	protein_coding	chr11:43774605-43901245	452	541	508	88	101	86	20.0795	23.4195	22.4478	3.63605	3.20733	3.31408	4.92575e-05	6.49245
Gm5144	lncRNA	chr15:11906525-11907390	15	20	21	5	3	2	3.46863	4.50674	4.83037	1.0754	0.495901	0.401186	0.00144191	6.49219
Hecw1	protein_coding	chr13:14226438-14523279	43	35	40	4	3	14	0.578465	0.458821	0.535258	0.0500497	0.0288495	0.163375	0.00123924	6.49076
Fzd5	protein_coding	chr1:64730558-64737750	2946	2709	2969	499	557	531	73.405	65.7762	73.5864	11.5645	9.92101	11.4772	2.19138e-05	6.4548
Serpinb6b	protein_coding	chr13:32956811-32979067	2218	2217	2500	371	525	400	185.219	180.408	207.662	28.8158	31.3394	28.9756	4.40358e-05	6.432
Tmprss7	protein_coding	chr16:45656309-45698553	12	11	4	2	2	1	0.26668	0.238214	0.0884226	0.0413401	0.0317721	0.0192778	0.0399379	6.42187
Ica1l	protein_coding	chr1:59989068-60043512	129	98	152	15	20	35	4.15159	3.07339	4.8659	0.449003	0.460111	0.977108	0.00345828	6.41011
Zfp697	protein_coding	chr3:98381339-98431951	649	610	684	130	127	102	15.1582	13.8835	15.891	2.82409	2.12038	2.06657	3.76391e-05	6.40885
Tmem151a	protein_coding	chr19:5079337-5085477	350	460	356	61	118	45	15.2842	19.5749	15.4639	2.47764	3.68354	1.70466	0.000731019	6.39768
LOC108168208	protein_coding	chr14:7956859-7961215	2	2	2	1	0	0	0.204602	0.199378	0.203519	0.095151	0	0	0.00577707	6.38458
Sphkap	protein_coding	chr1:83255442-83408393	12	16	21	4	3	2	0.274651	0.356851	0.478095	0.0851517	0.0490828	0.0397082	0.00679629	6.3791
Kcnmb1	protein_coding	chr11:33962946-33973641	43	38	34	3	9	10	1.74179	1.49995	1.36994	0.113027	0.260602	0.35138	0.00055615	6.36087
Alyref2	protein_coding	chr1:171503478-171504750	22	16	12	1	6	3	2.97726	2.10999	1.61536	0.125871	0.580434	0.35218	0.010913	6.33227
Mrc1	protein_coding	chr2:14229414-14332023	246	245	246	42	58	40	7.9691	7.73405	7.92691	1.26548	1.3431	1.12404	2.70492e-07	6.33067
Plxna4	protein_coding	chr6:32144543-32588192	651	719	577	145	111	105	8.89947	9.57808	7.84609	1.84367	1.08471	1.24515	0.000183603	6.30728
ENSMUSG00000087431.1	antisense	chr5:81791909-81798426	4	9	4	1	0	2	0.378835	0.830613	0.376829	0.0880892	0	0.164312	0.0483073	6.28475
Col14a1	protein_coding	chr15:55307694-55520803	8954	8906	8829	1542	1974	1570	218.306	211.591	214.119	34.9676	34.4036	33.2046	9.51663e-08	6.27845
Gm39777	lncRNA	chr2:27832686-27838405	5	4	2	0	0	2	0.303729	0.236779	0.120848	0	0	0.105389	0.0441822	6.27538
Gm36440	lncRNA	chr10:108444318-108444806	5	7	3	1	2	0	2.26678	3.09246	1.35287	0.421669	0.648151	0	0.0248563	6.27404
Dusp4	protein_coding	chr8:34807610-34819894	1046	1183	1114	214	246	178	74.2479	81.8284	78.6561	14.1286	12.4823	10.9603	1.02428e-05	6.24767
ENSMUSG00000097770.1	lincRNA	chr2:5137749-5230864	22	28	37	6	8	3	2.0246	2.51097	3.38698	0.513571	0.526277	0.23949	0.00566066	6.1927
Fstl4	protein_coding	chr11:52764042-53192450	15	7	15	1	7	0	0.290874	0.132275	0.289334	0.0180363	0.097033	0	0.0301154	6.19178
Pls3	protein_coding	chrX:75785654-75875178	14458	13612	14247	2390	3116	2723	677.203	621.297	663.787	104.122	104.332	110.639	5.51343e-06	6.14959
ENSMUSG00000102140.1	TEC	chr1:64736240-64740607	540	534	527	100	118	95	21.2977	20.5233	20.675	3.66837	3.32682	3.25022	3.43719e-07	6.09991
Foxn1	protein_coding	chr11:78357577-78387654	7	4	5	0	0	3	0.248235	0.138227	0.176372	0	0	0.0922859	0.0244662	6.0988
Best3	protein_coding	chr10:116986314-117025687	37	25	30	5	12	2	1.77257	1.1671	1.42961	0.222795	0.410952	0.0831155	0.00363993	6.09502
Cdkn2b	protein_coding	chr4:89306289-89311032	1472	1545	1447	289	325	259	182.045	186.194	178.006	33.2431	28.7318	27.7856	7.92154e-07	6.08558
Igf1	protein_coding	chr10:87858265-87937047	583	529	667	107	119	121	11.7511	10.3904	13.373	2.00597	1.7146	2.11565	0.00034169	6.08517
Gm33655	lncRNA	chr4:114576917-114592223	19	25	16	6	1	4	0.606602	0.777781	0.508119	0.17817	0.0228222	0.11078	0.00437172	6.07015
C5ar1	protein_coding	chr7:16246743-16259540	197	242	261	37	51	50	13.2055	15.8078	17.403	2.30687	2.44381	2.90743	0.000474424	6.06107
Gm32261	lncRNA	chrX:73669001-73673049	5	6	4	0	1	2	0.266268	0.311362	0.211886	0	0.0380676	0.0923905	0.00503173	6.05187
ENSMUSG00000105022.1	TEC	chr3:36529222-36532331	3	4	4	1	0	1	0.166182	0.215918	0.220403	0.0515223	0	0.048052	0.00222619	6.05078
Zfp853	protein_coding	chr5:143285999-143294805	20	22	17	5	1	5	0.441165	0.472891	0.373005	0.102583	0.0157681	0.0956733	0.000911702	6.01363
Pkp1	protein_coding	chr1:135871394-135919207	16	17	14	2	7	1	0.590236	0.611112	0.513722	0.0686228	0.184591	0.0320004	0.000955165	6.01327
Casq2	protein_coding	chr3:102086420-102146514	44	30	34	4	10	8	2.96098	1.9673	2.27591	0.250366	0.48105	0.467005	0.0027191	6.0114
Xkr4	protein_coding	chr1:3199733-3672278	79	61	75	14	12	16	0.973027	0.73214	0.918869	0.160383	0.105654	0.170949	0.000650715	6.00484
Gm33280	lncRNA	chr1:36129866-36134928	2	4	4	1	1	0	0.117074	0.22817	0.232909	0.0544459	0.0418446	0	0.01766	6.00427
Prr5l	protein_coding	chr2:101714266-101883074	120	115	125	22	29	21	3.14514	2.93713	3.25884	0.536308	0.543331	0.47745	1.13648e-05	5.99909
Pmaip1	protein_coding	chr18:66458604-66465558	949	942	858	143	214	196	61.601	59.5853	55.3992	8.63357	9.92985	11.0364	1.50197e-05	5.96576
Ccl17	protein_coding	chr8:94805250-94812038	13	7	8	1	4	1	0.86738	0.455125	0.530946	0.0620582	0.19078	0.0578783	0.0184904	5.96508
Dmrt2	protein_coding	chr19:25672389-25679013	8	8	3	0	2	2	0.559789	0.545495	0.208809	0	0.10004	0.121399	0.0391948	5.93436
Ncald	protein_coding	chr15:37366175-37792572	62	62	52	17	7	10	1.98643	1.93571	1.65722	0.506599	0.16032	0.277928	0.000430769	5.90505
Gm30363	lncRNA	chr14:21449256-21485648	3	6	6	1	1	1	0.142651	0.278017	0.283792	0.044227	0.0339908	0.0412481	0.0134841	5.89675
Myl4	protein_coding	chr11:104550529-104587219	44	48	35	11	7	7	3.67788	3.90978	2.91009	0.855205	0.418263	0.507565	0.000919931	5.89419
Cd300a	protein_coding	chr11:114888654-114904651	29	31	32	6	8	5	0.816069	0.850075	0.895723	0.157041	0.160926	0.122053	1.11574e-05	5.82216
Fam101b	protein_coding	chr11:76019194-76027782	1033	928	869	202	208	168	50.672	44.3591	42.4016	9.21621	7.29355	7.14869	0.000125177	5.80903
Sfrp4	protein_coding	chr13:19623175-19632825	536	629	529	113	123	110	52.4656	59.9967	51.5063	10.2878	8.60642	9.34011	7.74474e-05	5.80742
Tubb3	protein_coding	chr8:123411564-123422010	1462	1621	1376	273	351	295	146.179	157.938	136.852	25.3882	25.0872	25.5864	3.73798e-05	5.79751
Lims2	protein_coding	chr18:31922278-31958619	1416	1498	1361	268	360	260	93.0364	95.911	88.9493	16.3779	16.9083	14.8188	3.46943e-06	5.77688
Sema7a	protein_coding	chr9:57940135-57962865	691	909	653	133	211	129	35.4081	45.3895	33.2838	6.33883	7.72885	5.73408	0.0011414	5.76117
Tspan33	protein_coding	chr6:29694214-29718558	18	11	14	1	3	5	1.5497	0.922858	1.19894	0.0800771	0.184631	0.373418	0.00728807	5.75357
Tmem255b	protein_coding	chr8:13435164-13483437	20	14	18	3	5	3	0.576364	0.393153	0.515981	0.080412	0.103002	0.0749958	0.00169597	5.74862
Abat	protein_coding	chr16:8513429-8621568	521	512	646	118	119	110	19.3605	18.5403	23.8784	4.07844	3.16107	3.54586	0.000538121	5.72806
Hist2h3c2	protein_coding	chr3:96238479-96239127	35	33	43	5	7	11	9.29064	8.53608	11.3538	1.23447	1.32826	2.53291	0.00103235	5.72656
Gm32673	lncRNA	chr6:125430930-125460475	15	26	20	5	7	1	0.845591	1.42827	1.12149	0.262163	0.282082	0.0489011	0.00711044	5.72429
ENSMUSG00000085448.1	antisense	chr2:113387107-113441094	2	1	2	0	0	1	0.386267	0.188202	0.384222	0	0	0.167536	0.0377008	5.72231
Gm15816	protein_coding	chr8:23138785-23149585	2	2	1	0	0	1	0.203035	0.197851	0.10098	0	0	0.0880623	0.0357626	5.69898
ENSMUSG00000111447.1	antisense	chr10:20267049-20286647	2	2	1	0	0	1	0.295751	0.288199	0.147093	0	0	0.128276	0.0357626	5.69898
Wif1	protein_coding	chr10:121034004-121100642	3	4	3	0	0	2	0.23052	0.299511	0.229299	0	0	0.133311	0.0141152	5.69593
Tnmd	protein_coding	chrX:133851008-133865577	97	109	126	24	18	26	11.7104	12.8231	15.1309	2.6949	1.55338	2.72283	0.000539742	5.6898
Trnp1	protein_coding	chr4:133491097-133499225	955	1118	883	194	256	174	70.55	80.4827	64.8857	13.33	13.5189	11.1505	0.000212517	5.68217
Trabd2b	protein_coding	chr4:114406197-114615098	1758	1794	1853	395	397	336	41.8546	41.621	43.8827	8.74689	6.7565	6.93925	3.37244e-06	5.67484
Mmp15	protein_coding	chr8:95352296-95374293	72	52	63	16	14	9	2.87125	2.02073	2.49904	0.59346	0.399093	0.311337	0.00145238	5.66844
Comp	protein_coding	chr8:70373548-70382066	3005	3137	3219	598	785	596	170.628	173.575	181.812	31.5821	31.8628	29.3564	1.92325e-06	5.66819
Eppk1	protein_coding	chr15:76101488-76120195	54	29	42	6	12	9	0.754979	0.395099	0.584097	0.0780235	0.119931	0.109152	0.0104665	5.64682
Gm5093	protein_coding	chr17:46439488-46442350	4	2	3	0	1	1	0.240692	0.117273	0.179563	0	0.0430139	0.0521976	0.0195786	5.64562
Ivl	protein_coding	chr3:92570899-92573790	29	36	29	7	3	9	2.39271	2.89442	2.38004	0.537184	0.176938	0.644145	0.000676134	5.64482
Rasgrp3	protein_coding	chr17:75435870-75529054	242	229	270	37	49	70	8.05926	7.4316	8.94413	1.14608	1.1665	2.02222	0.000217544	5.63695
Gm40179	lncRNA	chr3:152104061-152106918	2	3	4	0	1	1	0.193242	0.282461	0.384437	0	0.0690683	0.0838148	0.018051	5.62613
ENSMUSG00000106062.1	TEC	chr3:37644607-37647952	11	8	5	1	1	3	0.566356	0.401378	0.256071	0.0478883	0.0368048	0.133988	0.0240971	5.59629
Kcnj12	protein_coding	chr11:61022564-61073269	12	8	9	4	2	0	0.42121	0.273637	0.314235	0.13059	0.0501829	0	0.00899411	5.58204
Cdh13	protein_coding	chr8:118140017-119324929	452	516	535	93	122	107	18.7274	20.8331	22.0489	3.58388	3.61331	3.84566	6.53746e-05	5.57911
Scrn1	protein_coding	chr6:54474794-54566517	599	572	593	138	125	110	27.4961	25.5862	27.0765	5.89191	4.10168	4.38012	1.07041e-05	5.57677
Slc1a6	protein_coding	chr10:78780496-78814825	996	963	874	183	251	177	79.8817	75.2629	69.7259	13.6512	14.3903	12.3143	3.33388e-05	5.57219
Plau	protein_coding	chr14:20836662-20843388	1355	1301	1100	267	296	239	92.632	86.6694	74.8013	16.9772	14.4651	14.1732	0.000197593	5.57053
Krt20	protein_coding	chr11:99428385-99438153	36	17	17	4	5	6	3.18373	1.46504	1.49547	0.329023	0.31609	0.460293	0.0420557	5.55835
Fbxo40	protein_coding	chr16:36963461-36990536	11	25	15	2	4	5	0.335581	0.74321	0.455188	0.0567502	0.0872313	0.13232	0.0270335	5.55184
Rtn4rl1	protein_coding	chr11:75193993-75267769	95	137	137	30	25	23	4.67337	6.5674	6.70381	1.37265	0.879131	0.981485	0.00187813	5.54998
Frem2	protein_coding	chr3:53513938-53657355	18	12	11	2	4	3	0.21206	0.137763	0.128906	0.0219154	0.0336863	0.0306589	0.00794107	5.5498
AU021092	protein_coding	chr16:5211814-5222308	3	2	3	0	2	0	0.37289	0.242246	0.370916	0	0.177704	0	0.021305	5.54885
Wnt16	protein_coding	chr6:22288168-22298522	77	82	77	17	15	18	2.54317	2.63916	2.52971	0.522236	0.354147	0.515711	5.36458e-06	5.53988
LOC101055797	pseudogene	chr15:25677274-25682644	26	21	17	4	6	4	0.833951	0.656377	0.542389	0.119333	0.137571	0.111295	0.00286832	5.5207
Samd15	protein_coding	chr12:87200458-87213538	4	7	3	1	1	1	0.203695	0.347364	0.151962	0.0473645	0.0364022	0.0441743	0.0306606	5.49489
Epha3	protein_coding	chr16:63545218-63864157	1339	1227	1283	242	302	292	57.988	51.7808	55.2686	9.74778	9.34915	10.9696	1.73819e-05	5.48908
Xcr1	protein_coding	chr9:123852315-123862029	9	12	10	2	4	1	0.348187	0.452395	0.384826	0.0719669	0.110621	0.0335598	0.00102515	5.48425
2310022B05Rik	protein_coding	chr8:124635756-124663369	11526	11781	11111	2335	2881	2287	600.436	598.049	575.753	113.138	107.285	103.348	5.35002e-07	5.47991
Dmd	protein_coding	chrX:82814664-85205050	871	759	863	147	211	188	8.05603	6.84087	7.93977	1.2646	1.39506	1.50838	9.34179e-05	5.479
Hist2h2aa2	protein_coding	chr3:96239779-96240374	15	17	20	5	3	3	4.33578	4.78841	5.75044	1.34425	0.619876	0.752223	0.00101758	5.47597
Gm10638	lncRNA	chr8:86745699-86747060	39	57	37	10	6	12	4.93299	7.02565	4.65523	1.17646	0.542505	1.31667	0.00449366	5.47295
Ccdc3	protein_coding	chr2:5137601-5235967	58	63	73	14	20	9	1.31959	1.39675	1.65207	0.29626	0.325274	0.177625	0.000416749	5.46627
Gm42368	protein_coding	chr4:147221860-147226323	49	67	46	11	11	13	2.51759	3.35452	2.35094	0.525672	0.404007	0.579404	0.00206857	5.44904
Kdr	protein_coding	chr5:75933265-75979074	32	54	43	8	9	11	1.0069	1.65577	1.34586	0.234132	0.202436	0.300248	0.0045276	5.44034
Nkd1	protein_coding	chr8:88521344-88594887	612	651	610	118	181	118	23.6448	24.5094	23.4428	4.24033	4.99886	3.95473	1.7332e-06	5.42652
Greb1	protein_coding	chr12:16670615-16801396	397	379	367	87	94	70	7.53146	7.00639	6.92547	1.53511	1.27475	1.15196	1.22397e-05	5.41754
Gpc6	protein_coding	chr14:116924657-117979529	4658	4263	4585	910	1134	936	46.0441	41.0636	45.0826	8.3666	8.01301	8.02602	1.94847e-05	5.41639
Ahsg	protein_coding	chr16:22892015-22899451	3	4	2	1	1	0	0.341364	0.44353	0.226371	0.105835	0.08134	0	0.017521	5.40278
Gm12153	lncRNA	chr11:43959089-44134987	23	30	26	4	9	5	1.4514	1.84479	1.63203	0.234775	0.405985	0.273703	0.000430918	5.3892
1700034H15Rik	lncRNA	chr1:191894072-191907527	52	56	40	12	3	16	2.05371	2.15522	1.57142	0.440809	0.0846965	0.548159	0.00234275	5.38376
Prn	protein_coding	chr2:131909928-131956131	52	41	40	7	13	10	2.6348	2.02439	2.01603	0.329894	0.470863	0.439534	0.000979785	5.38198
Tmem204	protein_coding	chr17:25057702-25083553	61	40	56	9	13	13	4.48327	2.86478	4.094	0.615234	0.682992	0.828815	0.00321867	5.37933
Palld	protein_coding	chr8:61511429-61902700	17638	17168	15847	3530	4225	3480	424.384	402.528	379.272	78.9982	72.6681	72.6337	1.56818e-05	5.37755
Cnn2	protein_coding	chr10:79988600-79995400	15783	16009	16116	3167	4316	3220	1525.82	1508.15	1549.77	284.771	298.266	270.035	1.12511e-07	5.37322
4833412C05Rik	lncRNA	chr7:67784538-67803496	83	65	63	16	13	17	13.203	10.0757	9.96848	2.36726	1.47824	2.34581	0.0012076	5.36997
Shroom3	protein_coding	chr5:92683435-92965759	728	806	662	153	201	137	15.3264	16.5353	13.8632	2.99595	3.02492	2.50196	9.66697e-05	5.36499
Aldh1a1	protein_coding	chr19:20601982-20643462	822	787	809	131	226	188	69.69	65.019	68.2247	10.3301	13.6967	13.8263	6.7043e-06	5.3611
Kazald1	protein_coding	chr19:45075091-45079289	416	447	430	91	104	92	34.0782	35.6827	35.0386	6.93358	6.09009	6.53763	7.03126e-07	5.35749
Pcsk6	protein_coding	chr7:65862136-66050386	2987	2899	3014	602	806	588	119.727	113.232	120.169	22.4432	23.094	20.4448	2.28287e-06	5.35189
Tnfrsf11a	protein_coding	chr1:105780723-105847981	95	58	48	11	16	18	3.25889	1.93883	1.63788	0.350971	0.39235	0.535633	0.020883	5.34468
Gsn	protein_coding	chr2:35256359-35307902	18952	20074	19674	4080	4945	4091	1061.77	1095.92	1096.39	212.603	198.039	198.818	2.34439e-07	5.33928
Cdh6	protein_coding	chr15:13028699-13176476	41	27	30	2	18	4	0.620729	0.398335	0.451787	0.0281632	0.194804	0.0525325	0.00932022	5.33885
Clec14a	protein_coding	chr12:58264720-58269258	56	57	55	14	12	11	2.12545	2.10816	2.07644	0.494223	0.325575	0.362163	5.58954e-06	5.33862
Gm34945	lncRNA	chr9:120991972-121000221	2	1	2	1	0	0	0.0629775	0.0306847	0.0626441	0.0292879	0	0	0.0431684	5.33689
Gm35162	lncRNA	chr8:88519575-88521220	2	1	2	1	0	0	0.725369	0.353424	0.721528	0.337335	0	0	0.0431684	5.33689
Gm34303	pseudogene	chr3:52425346-52425728	2	1	2	1	0	0	0.899609	0.438319	0.894846	0.418366	0	0	0.0431684	5.33689
Rprm	protein_coding	chr2:54084093-54085552	23	20	11	1	3	8	2.71392	2.29967	1.29109	0.109749	0.253045	0.818859	0.0228174	5.33548
Msrb3	protein_coding	chr10:120781096-120899215	6606	6253	6581	1325	1571	1445	287.604	265.284	284.999	53.6544	48.8923	54.5725	6.25229e-06	5.33281
Cpb1	protein_coding	chr3:20249479-20275733	22	18	31	4	6	6	2.52166	2.01049	3.53443	0.426438	0.491612	0.596574	0.00835402	5.3258
Psmb11	protein_coding	chr14:54625310-54629556	2	2	1	1	0	0	0.0811279	0.0790564	0.0403492	0.0377288	0	0	0.0411715	5.31513
Gm30270	lncRNA	chr6:21852418-21853783	1	2	2	1	0	0	0.208062	0.405498	0.41392	0.19352	0	0	0.0406218	5.30944
Gm33554	lncRNA	chr6:100196003-100201228	1	2	2	1	0	0	0.163449	0.318551	0.325167	0.152025	0	0	0.0406218	5.30944
Acvr1c	protein_coding	chr2:58267453-58357898	1	2	2	1	0	0	0.0171674	0.0334581	0.0341531	0.0159675	0	0	0.0406218	5.30944
Gm36418	lncRNA	chr18:78313144-78353491	11	15	8	0	4	4	1.03951	1.38132	0.752004	0	0.270211	0.327903	0.0145594	5.30473
Sqle	protein_coding	chr15:59315092-59331193	2013	1755	1952	425	403	444	126.197	107.213	121.725	24.7815	18.06	24.1456	9.61061e-05	5.30155
Hspb1	protein_coding	chr5:135887919-135889563	4365	4749	4638	907	1288	949	832.758	882.884	880.157	160.944	175.654	157.054	2.1849e-06	5.25835
Rpl26-ps6	pseudogene	chr9:43217081-43217593	14	19	27	1	6	7	4.70146	6.21764	9.0191	0.312347	1.44034	2.03917	0.0168043	5.25817
Frmd3	protein_coding	chr4:74013603-74202214	129	128	156	22	33	39	5.22046	5.04772	6.27969	0.828084	0.954641	1.36909	0.000436332	5.25026
Cbr2	protein_coding	chr11:120729485-120732025	51	63	53	1	16	22	8.57174	10.3182	8.86072	0.156326	1.92232	3.20753	0.00194722	5.24967
Spta1	protein_coding	chr1:174172776-174248449	32	46	41	11	11	5	0.640577	0.897316	0.816393	0.204808	0.157406	0.0868241	0.00158014	5.24296
Cables1	protein_coding	chr18:11839274-11945627	36	52	21	5	4	15	1.85519	2.6113	1.07646	0.239656	0.147351	0.670543	0.0338263	5.24131
ENSMUSG00000084835.1	antisense	chr11:98438037-98439046	45	46	24	9	15	3	10.2005	10.1609	5.41146	1.89751	2.43057	0.589902	0.014436	5.24054
Prelp	protein_coding	chr1:133910304-133929977	16173	16358	16635	3797	4168	3204	696.725	686.701	712.834	152.14	128.353	119.733	1.35004e-06	5.23769
ENSMUSG00000102881.1	TEC	chr11:120581670-120582837	5	7	5	1	2	1	0.737479	1.00611	0.733574	0.137187	0.210871	0.127947	0.00207755	5.20407
Mtus2	protein_coding	chr5:147957320-148316065	334	309	346	67	89	72	6.95094	6.26646	7.16255	1.29689	1.32402	1.29981	3.49153e-05	5.19801
Cadm1	protein_coding	chr9:47530170-47862280	99	123	91	23	23	25	1.22295	1.48062	1.11817	0.264261	0.203099	0.267894	0.000720621	5.19786
Vegfd	protein_coding	chrX:164373000-164402650	3128	3061	3554	693	760	770	210.993	201.202	238.459	43.4778	36.6457	45.0549	0.000106362	5.19781
Adamts12	protein_coding	chr15:11064790-11346867	3093	3081	2968	661	801	638	85.4743	82.9686	81.5857	16.9899	15.8232	15.2942	6.97193e-07	5.19731
Trim16	protein_coding	chr11:62820191-62842948	1120	1120	1108	232	296	243	48.7489	47.5041	47.9712	9.3922	9.20971	9.17492	4.91014e-08	5.19225
Arfgef3	protein_coding	chr10:18588011-18743758	12	13	10	3	3	2	0.251619	0.265627	0.208572	0.0585081	0.0449667	0.0363782	0.000439758	5.18986
Tspyl5	protein_coding	chr15:33683875-33687883	47	42	41	9	6	14	2.01969	1.75874	1.75253	0.359718	0.184308	0.521872	0.000345729	5.18901
ENSMUSG00000104432.1	TEC	chr9:72011376-72013019	4	6	5	0	4	0	0.419161	0.612687	0.521177	0	0.299632	0	0.0217643	5.18311
Lrp2bp	protein_coding	chr8:46010598-46029478	17	19	14	5	2	4	0.803037	0.874595	0.657823	0.21968	0.0675343	0.163906	0.00127404	5.17701
Frmpd3	protein_coding	chrX:140277679-140435467	3	6	3	0	2	1	0.0601449	0.117218	0.0598265	0	0.0286626	0.0173911	0.0376523	5.15029
Gm34513	lncRNA	chr2:145713298-145725398	10	4	9	0	5	1	0.344895	0.134435	0.308762	0	0.123272	0.0299183	0.0474338	5.14453
ENSMUSG00000039798.2	antisense	chr2:29868723-29870317	38	46	47	12	16	3	4.65608	5.49239	5.72835	1.36758	1.40141	0.318866	0.00090057	5.14171
Sertad4	protein_coding	chr1:192844488-192855752	411	409	398	80	93	108	18.9928	18.4177	18.2947	3.4385	3.07211	4.32932	4.11102e-06	5.13888
Myo1e	protein_coding	chr9:70207350-70400067	2037	2027	1873	467	525	385	70.213	68.0842	64.2183	14.9719	12.9358	11.5116	1.13663e-05	5.13747
Gm715	protein_coding	chrX:60548008-60549217	20	14	24	2	7	5	2.84752	1.94237	3.39893	0.26485	0.712431	0.617528	0.00787553	5.13468
Nfatc2	protein_coding	chr2:168476410-168601657	46	44	32	12	10	6	0.946453	0.882187	0.654916	0.229644	0.147078	0.107088	0.00221706	5.13332
Gja5	protein_coding	chr3:97032402-97053634	10	16	10	5	2	1	0.541746	0.84466	0.538877	0.251941	0.077452	0.0469943	0.0125748	5.11517
Gm14321	misc_RNA	chr2:167777583-167783499	19	11	11	5	1	3	0.696579	0.392985	0.401148	0.170498	0.0262074	0.0954086	0.0209773	5.10318
Gm38882	lncRNA	chr6:117878547-117884595	19	12	13	3	2	5	1.46979	0.904586	1.00032	0.215852	0.110596	0.335522	0.00832362	5.09796
Gm6410	misc_RNA	chr8:4677526-4688740	5	9	9	2	0	3	0.37664	0.660641	0.674362	0.140126	0	0.196032	0.0154736	5.09178
Gadd45g	protein_coding	chr13:51846675-51848475	3845	4401	3856	803	1187	878	612.764	683.463	611.263	119.027	135.224	121.378	3.0565e-05	5.07812
Ptrf	protein_coding	chr11:100956736-100971212	20817	21267	20396	4538	5694	4481	646.521	643.631	630.092	131.088	126.412	120.723	1.02959e-07	5.07702
ENSMUSG00000106498.1	TEC	chr5:19198483-19201605	9	8	4	1	2	2	0.49647	0.430038	0.219485	0.0513078	0.0788657	0.0957039	0.0221546	5.07352
AA414768	protein_coding	chrX:12936873-12938541	504	497	557	114	145	109	52.0232	49.9907	57.1894	10.9447	10.699	9.75982	3.99216e-05	5.06961
S100b	protein_coding	chr10:76253836-76261319	87	116	105	17	34	23	9.02344	11.724	10.8327	1.63997	2.5208	2.06933	0.000534619	5.06897
Sytl5	protein_coding	chrX:9747559-9998864	186	175	184	33	46	50	3.48523	3.19538	3.4295	0.575128	0.616145	0.812713	1.95561e-05	5.04499
Exoc3l2	protein_coding	chr7:19463148-19496762	9	11	7	4	1	1	0.37752	0.449632	0.292072	0.15606	0.0299851	0.0363871	0.00816947	5.03176
Gml	protein_coding	chr15:74813435-74818967	2	5	5	1	2	0	0.251496	0.612687	0.625412	0.116959	0.179779	0	0.0407238	5.01989
Smad9	protein_coding	chr3:54755455-54801662	278	259	257	45	72	73	7.86025	7.13605	7.22801	1.18341	1.45523	1.79046	3.2581e-05	5.01779
Ccdc88c	protein_coding	chr12:100911519-101028983	40	41	45	11	12	7	0.804178	0.803235	0.899911	0.205692	0.172457	0.122079	7.66582e-05	5.01236
LOC108168375	lncRNA	chr18:31937560-31939110	75	41	47	14	16	9	15.2726	8.13584	9.52016	2.65163	2.32905	1.58981	0.016401	5.01159
Mxra7	protein_coding	chr11:116803400-116828068	3729	3826	3471	800	970	853	112.271	112.25	103.95	22.4026	20.8763	22.2778	6.32605e-06	5.01048
Gm30003	lncRNA	chr5:134747044-134822968	2	2	4	0	1	1	0.152321	0.148432	0.303029	0	0.0544424	0.0660662	0.0424484	5.01028
Gm38722	lncRNA	chr5:136632332-136675425	8	13	7	5	0	1	1.38513	2.19336	1.20557	0.805197	0	0.150193	0.0311247	5.00743
Gucy1b3	protein_coding	chr3:82032004-82074711	359	301	326	65	112	63	19.0239	15.5431	17.1837	3.2037	4.24259	2.89598	0.000219762	5.00381
Plcl1	protein_coding	chr1:55405946-55754285	458	440	525	90	124	126	12.0369	11.2686	13.7247	2.20001	2.32959	2.87256	0.000196252	5.00262
Lair1	protein_coding	chr7:4007073-4073507	58	52	48	9	9	19	2.28023	1.99214	1.87709	0.329098	0.25293	0.647967	0.000651049	4.99958
ENSMUSG00000102457.1	TEC	chr1:16618560-16621539	12	7	8	1	5	1	0.693725	0.39434	0.460035	0.0537699	0.206625	0.0501482	0.0168323	4.98513
Akap12	protein_coding	chr10:4266329-4359471	14695	15772	15137	3279	4336	3377	405.248	423.842	415.227	84.1057	85.4767	80.7851	4.71633e-07	4.96996
Adap2	protein_coding	chr11:80153894-80178827	54	41	41	8	13	12	1.90945	1.41275	1.44209	0.26311	0.328599	0.368083	0.00149877	4.96388
Bpgm	protein_coding	chr6:34476253-34505610	678	666	725	152	194	153	53.8012	51.4996	57.2262	11.2186	11.0045	10.5318	1.3388e-05	4.9619
Gm14285	lncRNA	chr2:131561614-131564453	18	25	29	6	5	6	1.68073	2.27474	2.69351	0.521087	0.333736	0.485989	0.00410355	4.95892
Gm35150	lncRNA	chr16:34683046-34690706	5	6	7	2	0	2	0.144405	0.168861	0.201097	0.0537248	0	0.0501062	0.00458915	4.95384
Spns2	protein_coding	chr11:72451638-72489920	23	21	25	3	13	2	0.984185	0.875658	1.0641	0.1194	0.397649	0.0742383	0.00248955	4.94506
Scara5	protein_coding	chr14:65666403-65764826	81	127	107	28	30	18	2.49362	3.80991	3.2766	0.801744	0.660197	0.480692	0.00293717	4.93152
Gucy1a2	protein_coding	chr9:3532349-3905791	1973	1492	1802	368	417	482	24.6036	18.1304	22.3522	4.26827	3.71719	5.21396	0.000887223	4.93099
Bves	protein_coding	chr10:45335762-45369708	12	14	9	2	6	1	1.06233	1.20774	0.792532	0.164681	0.379698	0.0767943	0.00577311	4.93036
Slc5a7	protein_coding	chr17:54273590-54299039	29	17	31	4	8	7	0.926038	0.528989	0.984662	0.118802	0.182612	0.1939	0.0110818	4.92554
Gfra1	protein_coding	chr19:58235581-58455946	134	131	122	32	37	25	4.08004	3.88685	3.695	0.906238	0.80532	0.660312	1.96273e-05	4.91675
Hpgds	protein_coding	chr6:65117293-65145015	53	43	77	12	15	15	2.54617	2.01302	3.67957	0.536199	0.515123	0.625105	0.0113238	4.91448
Nrep	protein_coding	chr18:33437019-33464029	147	161	137	19	44	47	10.2736	10.9647	9.52403	1.23507	2.19819	2.8494	0.000200984	4.89639
Tal1	protein_coding	chr4:115056426-115071755	12	13	15	3	5	2	0.38135	0.402581	0.474164	0.0886742	0.113585	0.0551344	0.0005258	4.88783
Fgf18	protein_coding	chr11:33116970-33147400	622	569	525	137	177	108	67.2662	59.9633	56.4756	13.7803	13.6832	10.1316	0.00013772	4.8864
ENSMUSG00000085213.1	antisense	chr4:150566869-150568544	12	27	16	7	4	2	4.40789	9.66451	5.84607	2.39156	1.05031	0.637278	0.0332361	4.88301
Jag1	protein_coding	chr2:137081451-137116520	3375	3144	3152	752	790	803	49.6099	45.0344	46.0867	10.2812	8.30098	10.2391	1.67907e-05	4.88289
Gm38481	protein_coding	chr2:53694370-53696853	15	13	18	4	3	4	1.04031	0.878579	1.24176	0.258026	0.14873	0.240647	0.00161698	4.88204
2900026A02Rik	protein_coding	chr5:113086323-113221288	4133	4136	3729	977	1092	861	59.5329	58.0548	53.4291	13.0894	11.244	10.7583	2.12099e-05	4.87343
ENSMUSG00000107194.1	TEC	chr5:93092759-93093351	22	27	20	8	8	1	6.39132	7.6436	5.77953	2.16168	1.66137	0.25201	0.00269798	4.86238
Gm11946	lncRNA	chr11:3530364-3536858	71	106	74	23	22	16	2.79834	4.07112	2.90113	0.843145	0.619829	0.54703	0.00345946	4.86098
Nexn	protein_coding	chr3:152236982-152266351	2304	1989	2338	473	608	551	79.1469	66.5814	79.8897	15.1128	14.9301	16.4192	0.000162075	4.85595
Gm42145	lncRNA	chr5:106592982-106608169	5	5	2	0	1	2	0.0901492	0.0878473	0.0358688	0	0.0128884	0.0312803	0.046826	4.84201
ENSMUSG00000090208.1	antisense	chr1:133906531-133914822	553	597	554	147	154	118	143.91	151.393	143.406	35.5807	28.6479	26.6376	6.46788e-06	4.82807
Hist1h4i	protein_coding	chr13:22040960-22041362	57	87	96	15	25	20	24.3665	36.2413	40.821	5.96405	7.6395	7.41646	0.00556007	4.82534
Sfrp2	protein_coding	chr3:83766158-83774314	594	582	657	141	150	159	45.0006	42.9657	49.5099	9.93537	8.12327	10.4491	6.0565e-05	4.82242
Sox18	protein_coding	chr2:181669837-181671640	12	23	15	3	8	2	1.2769	2.3849	1.58767	0.296913	0.608517	0.18461	0.0172153	4.81585
Notch3	protein_coding	chr17:32120820-32166896	3389	3567	3231	801	981	749	72.1147	73.9642	68.3886	15.8532	14.922	13.8256	5.33198e-06	4.8086
Cdkl1	protein_coding	chr12:69746846-69791267	76	83	98	19	19	25	5.61927	5.98014	7.20754	1.30663	1.00422	1.60345	0.000628009	4.80468
Hist1h3d	protein_coding	chr13:23575763-23576266	11	19	19	0	2	10	3.75997	6.32867	6.46011	0	0.488685	2.96511	0.0264196	4.79146
Dnajb4	protein_coding	chr3:152183871-152210328	4279	3947	4412	902	1223	1036	242.329	217.82	248.538	47.5119	49.5105	50.8947	3.81945e-05	4.79111
Fgfr2	protein_coding	chr7:130162451-130266944	1049	978	1022	226	278	255	22.7717	20.6884	22.0682	4.56312	4.31393	4.80187	1.03608e-05	4.79046
Mxd4	protein_coding	chr5:34176580-34187710	1125	1266	1115	315	323	231	164.385	180.264	162.061	42.8107	33.7379	29.2799	4.3591e-05	4.78802
Gm30286	lncRNA	chr2:131014185-131025161	7	5	7	1	3	1	0.974879	0.678562	0.969718	0.129535	0.298663	0.12081	0.00370295	4.778
Pdlim3	protein_coding	chr8:45885452-45919548	21	24	22	8	9	0	1.86004	2.07148	1.9383	0.659061	0.56984	0	0.001993	4.77648
4732416N19Rik	lncRNA	chr6:148212288-148235663	18	15	11	3	4	4	5.62786	4.57013	3.42104	0.872419	0.894002	1.08488	0.00498837	4.77643
Rgs22	protein_coding	chr15:35960508-36140635	2	4	3	2	0	0	0.0418346	0.0815329	0.0624197	0.0389107	0	0	0.0474195	4.77471
Fst	protein_coding	chr13:114452262-114458951	3779	3602	4049	886	1025	939	227.552	211.356	242.52	49.6217	44.12	49.0478	4.00601e-05	4.77226
Gm35470	lncRNA	chr15:55498421-55516153	16	6	14	5	4	0	0.398785	0.145726	0.347089	0.11591	0.0712666	0	0.0494619	4.76341
LOC105243553	lncRNA	chr11:109691580-109707091	82	45	67	10	23	17	1.41379	0.756048	1.14905	0.160363	0.283469	0.254254	0.0109217	4.75427
ENSMUSG00000111058.1	lincRNA	chr9:63926655-63937121	8	8	6	4	0	1	1.4693	1.43178	1.09614	0.683302	0	0.15932	0.0115378	4.74379
Tdrp	protein_coding	chr8:13952008-13975453	171	179	202	37	50	52	9.30188	9.48842	10.93	1.87201	1.94425	2.45373	0.000138342	4.74008
Wwc1	protein_coding	chr11:35839178-35980089	166	180	171	37	51	43	8.62675	9.11545	8.83954	1.78844	1.8946	1.93846	1.21466e-06	4.72859
Gm31005	lncRNA	chr11:97301331-97311190	3	4	5	1	1	1	0.266268	0.345958	0.44143	0.0825524	0.063446	0.0769921	0.0055633	4.72511
Gzmc	protein_coding	chr14:56231397-56241642	9	8	4	1	0	4	1.38932	1.20341	0.614204	0.143579	0	0.535633	0.0409379	4.72155
Fhl2	protein_coding	chr1:43123071-43198299	4493	4542	4553	1013	1205	1207	454.778	447.999	458.411	95.3686	87.1881	105.979	5.5435e-07	4.71757
Cdk15	protein_coding	chr1:59256861-59352612	11	6	11	2	2	3	0.900678	0.478734	0.895909	0.152314	0.117062	0.213082	0.0138108	4.7161
Ltbp1	protein_coding	chr17:75005529-75392967	4196	4041	4530	1058	1176	995	87.6414	82.2487	94.1167	20.5538	17.5585	18.0279	4.0838e-05	4.70263
Ctnnal1	protein_coding	chr4:56810935-56865379	394	336	396	81	109	97	17.4131	14.4706	17.4089	3.32965	3.44361	3.71879	0.000195763	4.69809
Dysf	protein_coding	chr6:84008314-84211060	2777	2845	2480	697	768	594	57.6048	57.5085	51.1716	13.4477	11.3881	10.6885	4.44187e-05	4.68087
Gm3571	pseudogene	chr10:93778611-93779773	4	7	4	0	2	2	0.59252	1.01043	0.589383	0	0.211778	0.256993	0.0232725	4.67677
2900089D17Rik	lncRNA	chr5:144241781-144256205	34	25	24	7	7	7	5.57843	3.99705	3.91687	1.06823	0.820991	0.996278	0.0029297	4.67592
Cldn15	protein_coding	chr5:136967869-136975845	60	49	71	11	16	19	5.58428	4.44405	6.57308	0.952229	1.06449	1.53398	0.00245265	4.67553
Ism2	protein_coding	chr12:87278638-87299724	23	29	11	8	7	1	1.27982	1.57248	0.608848	0.414042	0.278437	0.0482693	0.0408427	4.67251
Pde2a	protein_coding	chr7:101421691-101512829	428	450	352	105	112	96	13.6342	13.969	11.1538	3.11106	2.55042	2.65281	0.000359403	4.66149
Adgrl3	protein_coding	chr5:81019560-81827825	46	40	45	8	14	12	0.4567	0.38699	0.444406	0.0738747	0.0993593	0.103348	0.000134435	4.65719
Sfrp1	protein_coding	chr8:23411382-23449632	18185	16595	19613	4311	5364	4319	697.423	620.193	748.206	153.778	147.055	143.686	0.000132409	4.64732
Acaa1b	protein_coding	chr9:119148043-119157093	17	23	17	7	3	4	1.08269	1.42741	1.07696	0.414654	0.136579	0.220986	0.00272863	4.64513
Cdkl2	protein_coding	chr5:92006074-92043042	183	154	176	34	57	43	4.85618	3.98228	4.6457	0.839181	1.08125	0.989833	0.000206447	4.63331
Cadm4	protein_coding	chr7:24482023-24504533	377	362	426	86	128	90	30.1381	28.2001	33.875	6.3945	7.31463	6.24119	0.000143645	4.62214
Proz	protein_coding	chr8:13060581-13075006	8	11	13	1	1	6	0.472634	0.633278	0.763964	0.05495	0.0422321	0.307493	0.0155049	4.62068
Itga11	protein_coding	chr9:62677855-62783979	12091	12084	11216	2952	3666	2574	421.912	410.9	389.307	95.8095	91.4448	77.9143	8.37958e-06	4.60884
ENSMUSG00000104125.1	TEC	chr3:60604384-60607757	4	5	5	0	3	1	0.204238	0.248779	0.253946	0	0.109498	0.0442922	0.00654269	4.59694
Palm2	protein_coding	chr4:57568248-57717146	1046	976	955	276	249	239	21.9408	19.9497	19.9259	5.38471	3.7336	4.34878	4.01696e-05	4.59018
LOC108167895	lncRNA	chr11:35287973-35328034	43	19	34	8	9	8	0.486653	0.209542	0.382758	0.0842119	0.0728116	0.0785399	0.0254589	4.58031
Map2	protein_coding	chr1:66175246-66442583	116	82	101	17	32	30	1.22744	0.845516	1.06306	0.16731	0.242047	0.275367	0.00208155	4.57996
Serpinb1a	protein_coding	chr13:32842092-32851185	543	539	644	123	196	137	45.1692	43.6916	53.2872	9.51657	11.6548	9.88581	0.00026579	4.57697
Snta1	protein_coding	chr2:154376314-154408084	1794	1931	1541	441	506	424	146.128	153.271	124.856	33.4105	29.4625	29.959	0.00021404	4.57014
Gm26868	lncRNA	chr9:56606207-56618236	13	16	15	7	3	1	0.614593	0.737107	0.705391	0.307805	0.101385	0.0410104	0.00379581	4.56929
Gm35369	lncRNA	chr16:18588970-18596251	3	3	2	0	0	2	0.198779	0.193703	0.131818	0	0	0.114955	0.036059	4.56091
Gjb5	protein_coding	chr4:127354809-127358164	94	116	100	18	32	32	9.50344	11.4282	10.0565	1.69262	2.31265	2.80642	0.00025314	4.54926
Fras1	protein_coding	chr5:96373819-96784733	112	75	89	17	22	33	1.1569	0.754929	0.914456	0.163328	0.162446	0.295694	0.00417723	4.54777
Klhdc7a	protein_coding	chr4:139962173-139968026	10	10	12	3	1	4	0.294286	0.286772	0.351274	0.0821153	0.0210367	0.102113	0.00158576	4.5421
Gm41693	lncRNA	chr18:35871836-35877311	10	16	18	3	1	7	0.40148	0.625966	0.718838	0.112026	0.0286993	0.243787	0.0159567	4.54155
Msrb1	protein_coding	chr17:24736642-24742778	1735	1866	1711	419	535	445	337.356	353.563	330.928	75.7767	74.3618	75.0582	2.48944e-06	4.53757
Eapp	protein_coding	chr12:54670340-54695898	215	254	240	48	75	65	20.4976	23.5974	22.7599	4.25636	5.11132	5.3756	6.08514e-05	4.5346
Fmnl1	protein_coding	chr11:103170575-103198901	149	132	123	31	30	44	5.71184	4.93094	4.69017	1.10531	0.822088	1.46316	0.000379698	4.52225
Crocc2	protein_coding	chr1:93168423-93231067	110	97	109	25	39	21	2.12304	1.82433	2.0926	0.448785	0.538069	0.351588	0.000136563	4.51269
Myh10	protein_coding	chr11:68691915-68816625	17247	17807	16234	4143	5129	4295	377.203	379.506	353.168	84.2771	80.1866	81.4843	4.54429e-06	4.51265
Tmsb4x	protein_coding	chrX:167207093-167213479	20569	20965	21798	4329	7019	5598	3741.84	3716.5	3944.42	732.475	912.757	883.395	5.39136e-06	4.50947
Smarcd3	protein_coding	chr5:24592622-24624456	846	811	759	187	248	208	37.6991	35.2167	33.6432	7.7506	7.89987	8.04032	1.99783e-05	4.49791
Col2a1	protein_coding	chr15:97975602-98004724	265	281	320	68	75	85	7.776	8.03495	9.34017	1.85589	1.57318	2.16361	0.000221143	4.49715
Lxn	protein_coding	chr3:67457999-67463907	3693	3673	4056	944	1186	911	582.612	564.66	636.491	138.518	133.749	124.672	3.01099e-05	4.4938
ENSMUSG00000113472.1	TEC	chr13:63276905-63279224	18	11	22	5	2	6	1.33662	0.795965	1.62499	0.345332	0.106163	0.386487	0.0196246	4.48407
Col4a1	protein_coding	chr8:11198423-11312826	52238	59067	48944	13898	15647	12956	1206.34	1329.21	1124.29	298.517	258.299	259.54	0.000100108	4.48315
Cend1	protein_coding	chr7:141426446-141429540	114	77	106	21	27	31	10.7672	7.08688	9.95859	1.8448	1.82293	2.53985	0.00322455	4.48044
Plxnb3	protein_coding	chrX:73756559-73772510	14	25	33	8	7	4	0.338221	0.588544	0.793013	0.179761	0.120886	0.0838265	0.0296349	4.47307
Esyt2	protein_coding	chr12:116280590-116390935	9434	8502	9045	2223	2875	2143	95.7377	84.0765	91.3041	20.9826	20.8561	18.8651	3.52391e-05	4.46625
Col28a1	protein_coding	chr6:7997100-8193709	3299	3379	3731	809	1121	870	96.2791	96.0958	108.31	21.9599	23.3864	22.0251	4.41052e-05	4.4631
Itga1	protein_coding	chr13:114958079-115101964	1893	1851	2058	447	576	530	54.4981	51.9283	58.9347	11.9694	11.8539	13.236	3.39197e-05	4.46207
Vamp5	protein_coding	chr6:72368049-72380468	527	514	536	131	143	146	55.0904	52.3594	55.7346	12.7371	10.6858	13.2394	5.32106e-06	4.45102
ENSMUSG00000072852.3	antisense	chr5:76928368-76947758	3	3	5	0	1	2	0.653382	0.636699	1.0832	0	0.155687	0.377855	0.0283902	4.44816
Rgs5	protein_coding	chr1:169655501-169695813	1296	1539	1493	364	350	431	49.1132	56.8327	56.2791	12.83	9.48131	14.1684	0.000124416	4.44699
Rarres1	protein_coding	chr3:67478886-67515523	1282	1200	1384	273	409	364	156.525	142.772	168.084	31.0021	35.6965	38.5519	9.37605e-05	4.44065
Gm31305	lncRNA	chr3:97730481-97737139	12	17	8	1	3	6	0.628932	0.868237	0.417068	0.0487479	0.112396	0.272787	0.0280184	4.41139
Hc	protein_coding	chr2:34983329-35067034	14	23	21	7	3	5	0.427254	0.683995	0.637488	0.198696	0.0654466	0.132366	0.00683399	4.41033
1700120C14Rik	lncRNA	chr15:99251788-99262041	3	3	2	1	0	1	1.33202	1.29801	0.883314	0.412975	0	0.385159	0.00996402	4.40196
Il21r	protein_coding	chr7:125603251-125633570	19	28	21	5	10	4	1.14489	1.64412	1.2587	0.280228	0.430741	0.209082	0.00317976	4.39943
Cd248	protein_coding	chr19:5068078-5070640	13161	14240	11652	3572	3964	3026	884.632	932.718	779.056	223.315	190.465	176.438	0.000147235	4.39906
Gpr17	protein_coding	chr18:31942999-31949902	109	122	86	24	31	31	3.43982	3.75177	2.69962	0.704455	0.699324	0.848634	0.0012853	4.39138
Adcy1	protein_coding	chr11:7063489-7178506	425	506	421	118	156	96	5.9725	6.92922	5.88497	1.54235	1.56711	1.17028	0.000174291	4.38969
Pclo	protein_coding	chr5:14514916-14863465	7	5	9	0	3	3	0.0543185	0.0378082	0.0694683	0	0.016641	0.0201939	0.0197729	4.38701
ENSMUSG00000113528.1	TEC	chr13:17944291-17946278	2	3	2	0	1	1	0.173315	0.253334	0.172397	0	0.061946	0.0751719	0.0122169	4.36884
Gcat	protein_coding	chr15:79030874-79042531	83	111	88	21	22	33	4.8031	6.25941	5.06548	1.13031	0.910068	1.65656	0.00115627	4.36253
Idi1	protein_coding	chr13:8885606-8892396	236	203	257	52	75	65	14.181	11.8866	15.3611	2.90624	3.22154	3.38811	0.000495585	4.35363
4833422C13Rik	lncRNA	chr13:91701665-91741872	28	43	31	3	20	7	0.858768	1.28515	0.945745	0.08558	0.438486	0.186237	0.00900294	4.34978
Mef2c	protein_coding	chr13:83504034-83667079	520	458	515	130	156	124	12.4197	10.6595	12.2351	2.8879	2.66341	2.56908	8.91571e-05	4.34884
Syndig1	protein_coding	chr2:149830783-150004392	10	14	12	2	4	4	0.760261	1.03719	0.907483	0.141425	0.217385	0.263798	0.00137228	4.34451
C4bp	protein_coding	chr1:130635921-130661645	37	44	46	7	12	16	3.29926	3.82327	4.08007	0.580559	0.764899	1.23761	0.000679535	4.33693
Gm32255	lncRNA	chr10:67496359-67535340	14	14	18	5	7	1	1.41375	1.37765	1.80805	0.46962	0.5053	0.0875977	0.00356777	4.32882
Lrrn2	protein_coding	chr1:132880355-132940005	34	36	43	11	11	9	1.75055	1.8062	2.20221	0.526771	0.404852	0.401965	0.0005695	4.3184
Fam167a	protein_coding	chr14:63436394-63465502	16	15	7	3	1	6	0.566927	0.517923	0.246718	0.0988693	0.0253288	0.18442	0.0359081	4.31461
Jade1	protein_coding	chr3:41555734-41616864	2019	1884	1987	443	636	561	54.9224	49.9414	53.7657	11.2086	12.3674	13.2381	1.48865e-05	4.30894
ENSMUSG00000107317.1	antisense	chr5:149282752-149287868	26	31	30	7	14	4	1.0589	1.2303	1.21534	0.265163	0.407584	0.141316	0.000686726	4.305
LOC105244487	lncRNA	chr3:88030783-88036210	8	13	6	2	0	5	0.430553	0.681784	0.321205	0.100115	0	0.23343	0.0440343	4.2979
Diras2	protein_coding	chr13:52504375-52531241	32	26	29	14	5	4	1.20868	0.956979	1.08957	0.491839	0.135002	0.13106	0.00400972	4.29506
Fam150a	protein_coding	chr1:6359331-6394731	17	16	31	2	12	5	3.41338	3.13056	6.19144	0.373506	1.72236	0.870872	0.0364916	4.29272
Anxa5	protein_coding	chr3:36448923-36475887	11194	11937	11053	2756	3731	3086	1118.59	1162.38	1098.65	256.152	266.513	267.504	1.45426e-06	4.27708
Gm39090	lncRNA	chr7:127690928-127701645	23	17	19	5	9	3	0.779219	0.561238	0.640294	0.157556	0.217962	0.0881662	0.00238988	4.27177
Ptpro	protein_coding	chr6:137252299-137464634	12	16	19	6	5	2	0.306312	0.397988	0.482426	0.142452	0.0912348	0.0442856	0.00650322	4.26923
Col5a1	protein_coding	chr2:27886395-28039510	69714	77360	64200	18671	22851	17613	1412.77	1527.69	1294.14	351.927	331.028	309.624	9.44233e-05	4.26626
Maneal	protein_coding	chr4:124855239-124880938	26	26	15	2	7	10	1.30094	1.26773	0.746571	0.0930783	0.250375	0.434045	0.0144821	4.26399
Megf10	protein_coding	chr18:57133090-57297467	679	608	614	166	187	177	15.5676	13.5838	14.0028	3.53991	3.06479	3.52025	6.03408e-05	4.26216
Lyl1	protein_coding	chr8:84701422-84704716	26	20	14	6	2	8	2.43963	1.82872	1.30669	0.523641	0.134149	0.651162	0.0171972	4.25915
Dlk2	protein_coding	chr17:46297248-46303271	15	11	23	3	6	5	0.962789	0.688017	1.46846	0.179099	0.275295	0.278394	0.0261587	4.25671
Cd109	protein_coding	chr9:78615546-78716260	7200	7139	7620	1896	2264	1993	211.417	204.273	222.564	51.7819	47.5215	50.7648	7.63187e-06	4.25309
Tbxa2r	protein_coding	chr10:81328257-81335184	847	953	867	252	274	220	66.4467	72.8534	67.6556	18.3875	15.3656	14.9714	1.93564e-05	4.24747
Crybb3	protein_coding	chr5:113075839-113082233	22	28	30	10	7	5	2.36288	2.93051	3.20504	0.998967	0.537432	0.465841	0.00192926	4.24446
LOC108168959	protein_coding	chr4:137345484-137357741	12	22	10	5	3	4	1.0352	1.84941	0.858102	0.401187	0.185001	0.299332	0.0377713	4.22657
5033430I15Rik	misc_RNA	chr13:45965062-45966508	26	40	24	9	8	8	4.86864	7.29896	4.47034	1.56751	1.07086	1.29949	0.00912445	4.22512
B230206H07Rik	lncRNA	chr7:141359178-141365110	26	11	22	6	8	3	1.52612	0.629178	1.28449	0.327566	0.335669	0.152751	0.033342	4.2155
Ppl	protein_coding	chr16:5086291-5132481	12	18	13	2	3	7	0.329345	0.481404	0.354902	0.0510544	0.0588571	0.166655	0.0078251	4.21473
Sptb	protein_coding	chr12:76580488-76710547	58	67	72	14	21	21	0.96132	1.08213	1.18704	0.215824	0.248809	0.301931	0.000299687	4.21425
Tubb2a	protein_coding	chr13:34074278-34078008	1935	2069	1821	488	615	548	207.438	216.139	194.183	48.6586	47.1291	50.9608	1.72137e-05	4.20965
Actg-ps1	pseudogene	chr8:46229011-46230128	10	6	7	2	5	0	1.54092	0.900945	1.07293	0.286644	0.550755	0	0.0229946	4.19728
Cd72	protein_coding	chr4:43447724-43454741	181	193	229	59	64	48	17.7877	18.4827	22.3857	5.39294	4.49602	4.09196	0.00055119	4.19544
Gm39323	lncRNA	chr9:44012180-44042184	37	51	41	9	9	18	1.30165	1.74835	1.43473	0.294488	0.22633	0.549306	0.0023109	4.19085
ENSMUSG00000106000.1	lincRNA	chr3:41286061-41290590	4	4	5	1	3	0	0.251313	0.244896	0.312478	0.058437	0.134736	0	0.00999744	4.18634
Pccb	protein_coding	chr9:100982032-101034940	488	481	589	160	135	142	35.5928	34.1865	42.7319	10.8541	7.03856	8.98422	0.00057053	4.18616
Mlph	protein_coding	chr1:90915023-90951142	29	39	30	7	16	6	1.09537	1.43547	1.12714	0.24592	0.432006	0.196591	0.00203859	4.18286
LOC108167445	lncRNA	chr7:89510877-89511868	25	22	34	5	7	11	10.1577	8.71056	13.7414	1.88955	2.03312	3.87703	0.0070577	4.18089
Slc7a8	protein_coding	chr14:54722215-54781886	208	200	201	57	56	59	8.84552	8.28814	8.50258	2.25459	1.70238	2.17651	1.04863e-05	4.17972
Smagp	protein_coding	chr15:100621339-100636940	18	12	13	4	3	5	2.11814	1.37603	1.52167	0.437798	0.252354	0.510388	0.00606116	4.17798
Cdsn	protein_coding	chr17:35543082-35557180	282	313	266	76	98	73	17.5006	18.9284	16.4202	4.38682	4.34747	3.92984	5.50399e-05	4.17314
Gng4	protein_coding	chr13:13784059-13827895	12	10	7	4	2	2	0.636288	0.516701	0.369203	0.197272	0.0758072	0.0919924	0.0109994	4.16957
Dnajb3	protein_coding	chr1:88204732-88205748	35	50	61	11	22	10	5.92884	8.2535	10.2784	1.73311	2.66398	1.46944	0.00904175	4.16954
Mrgprf	protein_coding	chr7:145300909-145309557	849	935	941	269	220	276	68.9913	74.0397	76.0625	20.3316	12.7796	19.4556	6.31863e-05	4.16791
ENSMUSG00000104235.1	TEC	chr3:60535751-60539744	20	18	18	3	5	8	0.862669	0.756578	0.772292	0.120356	0.154167	0.299332	0.000697942	4.16749
1700112J16Rik	lncRNA	chr7:67204082-67222536	3	7	7	0	2	3	0.20756	0.471941	0.481743	0	0.0989146	0.18005	0.0471936	4.16269
Tpm1	protein_coding	chr9:67022590-67049401	30211	30393	29968	7733	9673	8574	1054.84	1034.1	1040.82	251.133	241.43	259.691	6.45345e-08	4.16052
Lrrn3	protein_coding	chr12:41451668-41486057	11	17	14	3	4	5	0.53836	0.810766	0.681557	0.136563	0.139942	0.212275	0.00337459	4.15459
Gm18541	pseudogene	chr9:63898128-63898957	1	1	1	0	1	0	0.20756	0.20226	0.206461	0	0.148372	0	0.0344494	4.15363
Gm19582	lncRNA	chr1:87853347-87854299	1	1	1	0	1	0	0.204846	0.199615	0.203761	0	0.146431	0	0.0344494	4.15363
Rpl19-ps3	pseudogene	chr14:49112131-49112830	1	1	1	0	1	0	0.246107	0.239823	0.244804	0	0.175927	0	0.0344494	4.15363
3110045C21Rik	lncRNA	chr1:169969409-169972396	14	17	18	3	10	2	2.12498	2.51444	2.71765	0.423527	1.08501	0.263333	0.00367782	4.15215
Ano4	protein_coding	chr10:88948932-89345082	8	8	5	2	2	2	0.238939	0.232838	0.148546	0.0555597	0.0427007	0.0518175	0.00597072	4.13334
Lrrc15	protein_coding	chr16:30269302-30283254	45	42	50	14	18	8	1.46051	1.32833	1.6142	0.422622	0.417611	0.225232	0.00045062	4.1325
Llgl2	protein_coding	chr11:115824029-115855780	189	194	178	58	63	41	7.22432	7.22609	6.76783	2.06203	1.7214	1.35947	2.97279e-05	4.12573
Sned1	protein_coding	chr1:93235816-93301065	10233	9449	9813	2799	3269	2470	169.216	152.262	161.411	43.0501	38.6421	35.4311	2.2359e-05	4.12291
Cd9	protein_coding	chr6:125460266-125494755	3315	3309	3553	835	1120	1001	479.104	466.025	510.782	112.245	115.71	125.496	1.20493e-05	4.11914
Micalcl	protein_coding	chr7:112368308-112413104	29	42	21	9	7	10	2.08426	2.94151	1.5013	0.60163	0.359633	0.623453	0.0181353	4.11876
ENSMUSG00000104850.1	antisense	chr3:53038585-53041755	48	87	50	18	18	17	2.60776	4.60587	2.70203	0.909561	0.699047	0.80117	0.0186623	4.11477
Ldlr	protein_coding	chr9:21723576-21749919	3404	3242	3126	972	894	933	129.339	120.039	118.147	34.3511	24.2821	30.7519	3.40498e-05	4.11171
Radil	protein_coding	chr5:142484839-142551098	214	225	253	61	85	57	8.54785	8.75774	10.0521	2.26624	2.427	1.975	0.000146249	4.10269
Kazn	protein_coding	chr4:142102390-142239401	906	831	785	236	244	248	21.1521	18.9057	18.2301	5.12472	4.07214	5.02257	9.98433e-05	4.09917
Cgref1	protein_coding	chr5:30933143-30945480	250	319	277	81	83	80	32.3582	40.2348	35.6631	9.7513	7.67945	8.98222	0.00032108	4.0986
Nxnl2	protein_coding	chr13:51170111-51175191	11	13	11	2	8	1	1.08784	1.25281	1.08209	0.183966	0.565551	0.0857874	0.00531031	4.09759
Efnb1	protein_coding	chrX:99136061-99149022	1701	1881	1628	488	614	423	87.2662	94.0367	83.0789	23.286	22.5174	18.8248	4.37994e-05	4.09081
Serpinb8	protein_coding	chr1:107589926-107611795	163	166	135	34	66	39	4.53942	4.50492	3.73973	0.880693	1.3139	0.942164	0.000396801	4.07556
Wdr6	protein_coding	chr9:108572313-108578670	1794	1791	1714	509	540	495	75.5282	73.4766	71.7781	19.9314	16.2513	18.0776	3.33847e-06	4.06896
Myl6	protein_coding	chr10:128490859-128493886	10028	11518	10291	2685	3767	2951	1938.92	2170.14	1979.23	482.861	520.652	494.952	2.92851e-05	4.06302
Nfam1	protein_coding	chr15:82996736-83033397	60	72	89	20	19	25	2.27526	2.6606	3.3571	0.705412	0.51504	0.822374	0.00318354	4.05955
Ppp1r1a	protein_coding	chr15:103530279-103538003	41	47	37	18	12	6	3.25347	3.63435	2.92051	1.32852	0.680693	0.413013	0.00195501	4.04931
Trpc5os	protein_coding	chrX:144455781-144477063	3	4	3	0	1	2	0.109265	0.141967	0.108687	0	0.0260357	0.0631889	0.0134749	4.03386
Lmna	protein_coding	chr3:88481148-88509932	14794	16226	14150	4089	5288	4039	723.428	773.193	688.273	185.977	184.845	171.33	2.60396e-05	4.03004
Ccdc68	protein_coding	chr18:69924858-69969488	313	234	309	70	102	84	26.8403	19.5535	26.357	5.58307	6.25245	6.24843	0.001522	4.02294
Plxna2	protein_coding	chr1:194619829-194816869	736	802	798	205	248	241	11.4466	12.1546	12.3452	2.96543	2.75714	3.25137	8.26409e-06	4.00565
Gm6093	lncRNA	chr13:33562486-33569317	41	26	32	10	14	6	2.07256	1.28075	1.60904	0.470171	0.505893	0.263102	0.00682952	4.00459
Xkrx	protein_coding	chrX:134149045-134185505	14	10	7	1	7	2	0.47033	0.327372	0.23392	0.0312469	0.168105	0.0582846	0.0327204	4.00418
Synpo	protein_coding	chr18:60593981-60660174	10377	10754	9750	3064	3269	2824	216.455	218.591	202.299	59.4452	48.7436	51.0986	1.23938e-05	4.00122
Id1	protein_coding	chr2:152736234-152737410	945	1063	1009	230	401	283	170.293	186.666	180.863	38.5501	51.6555	44.2385	2.52806e-05	4.00034
Lamb3	protein_coding	chr1:193294353-193343878	34	18	42	12	11	5	1.3644	0.703883	1.67651	0.447894	0.315545	0.174053	0.0346365	3.99447
ENSMUSG00000085023.1	antisense	chr4:106587097-106589108	59	50	66	15	23	15	19.5843	16.173	21.7918	4.63105	5.45746	4.31912	0.000997989	3.99435
Tmem37	protein_coding	chr1:120067377-120074069	206	215	165	46	79	53	27.1736	27.6366	21.65	5.64378	7.44927	6.06463	0.000669899	3.99109
Adgrf5	protein_coding	chr17:43360327-43459557	212	201	201	50	77	59	3.91576	3.61779	3.69293	0.858981	1.01667	0.945327	9.81468e-06	3.97965
ENSMUSG00000103502.1	antisense	chr3:62337524-62340532	25	10	20	5	3	8	1.43133	0.557914	1.139	0.266258	0.12278	0.397319	0.0438646	3.97815
Fabp3	protein_coding	chr4:130308778-130315463	173	233	222	58	68	62	46.5681	61.1174	59.4415	14.5212	13.0846	14.4772	0.000836065	3.97137
Adrb3	protein_coding	chr8:27225776-27230807	45	37	45	12	13	13	2.2137	1.77368	2.20198	0.549061	0.457148	0.554752	0.000480588	3.96509
Ctnnd1	protein_coding	chr2:84600781-84658972	12657	12269	12473	3421	4226	3615	295.739	279.353	289.897	74.3471	70.5854	73.2716	1.6261e-06	3.96413
Ecel1	protein_coding	chr1:87142874-87157085	26	24	23	4	7	11	0.729029	0.655766	0.641495	0.104319	0.140306	0.267555	0.000865753	3.9562
Hs3st3b1	protein_coding	chr11:63884693-63922284	85	71	87	17	27	30	2.43894	1.98521	2.48311	0.453695	0.5538	0.746711	0.000686043	3.93754
Sp7	protein_coding	chr15:102356606-102367040	122	93	110	29	44	27	6.40194	4.75555	5.74168	1.41541	1.65049	1.22904	0.0010455	3.93468
Fjx1	protein_coding	chr2:102449366-102451792	670	663	681	189	209	210	47.5584	45.8599	48.0833	12.4781	10.6049	12.9307	3.57659e-06	3.92911
ENSMUSG00000101925.1	antisense	chr11:101339660-101347939	6	9	8	3	3	1	0.909904	1.33	1.20678	0.423154	0.325217	0.131551	0.00481622	3.91704
Papss2	protein_coding	chr19:32595645-32667187	1316	1207	1304	350	442	376	58.3713	52.1696	57.5328	14.4392	14.0144	14.4671	2.81235e-05	3.91591
Bcar3	protein_coding	chr3:122419780-122530191	136	117	121	20	42	53	5.50632	4.6161	4.87307	0.753157	1.21557	1.86144	0.000865369	3.91511
C330020E22Rik	lncRNA	chr4:129382546-129407475	13	26	31	2	10	10	0.852522	1.66151	2.02217	0.12199	0.468781	0.568868	0.0387557	3.91174
Rgs18	protein_coding	chr1:144752692-144775421	8	8	14	4	3	2	0.432852	0.421799	0.75348	0.201299	0.116032	0.0938704	0.0246163	3.91081
Slc46a3	protein_coding	chr5:147877846-147894863	41	35	39	12	13	10	2.29551	1.90954	2.17197	0.624898	0.52029	0.485673	0.00019914	3.91022
Asgr1	protein_coding	chr11:70048909-70057895	5	5	7	2	1	2	0.171691	0.167307	0.239095	0.0638765	0.0245463	0.0595741	0.00554842	3.90612
Ahnak	protein_coding	chr19:8989121-9076935	57364	57300	57426	16491	20247	16043	499.337	486.044	497.231	133.516	125.986	121.141	2.95763e-07	3.89502
C130074G19Rik	protein_coding	chr1:184871926-184883036	198	169	204	52	63	60	11.956	9.9443	12.2531	2.9205	2.71937	3.14283	0.000326471	3.88871
Prkab2	protein_coding	chr3:97658212-97673812	2096	2101	2319	615	790	605	69.4001	67.7893	76.3772	18.9399	18.6983	17.3769	3.89967e-05	3.88196
ENSMUSG00000104724.1	TEC	chr3:138976312-138978081	8	7	7	0	3	4	0.778644	0.663917	0.677707	0	0.208727	0.337721	0.00746707	3.88009
Sash3	protein_coding	chrX:48146436-48161565	27	31	20	8	15	2	1.73561	1.94185	1.27883	0.478311	0.689265	0.111524	0.00903643	3.87482
Prkcdbp	protein_coding	chr7:105480616-105482197	1853	2101	1901	534	669	600	311.136	343.77	317.506	83.3968	80.2987	87.3928	1.91704e-05	3.87279
Rapsn	protein_coding	chr2:91035459-91045729	48	32	21	8	10	13	4.62483	3.0045	2.01265	0.716932	0.688751	1.08654	0.0366805	3.86882
Lama3	protein_coding	chr18:12333718-12583013	56	58	69	24	15	16	0.807923	0.815411	0.990206	0.322052	0.154696	0.20024	0.00114823	3.86054
Gm34139	pseudogene	chr3:122788002-122788739	4	4	6	2	0	2	1.12782	1.09903	1.68278	0.524498	0	0.489171	0.0192013	3.85691
ENSMUSG00000106702.1	antisense	chr5:34173887-34174887	545	501	477	164	199	111	182.665	163.63	159.028	51.1253	47.6782	32.2724	0.000176427	3.85519
ENSMUSG00000103851.1	TEC	chr16:77561650-77564765	4	6	4	2	0	2	0.221149	0.323253	0.219978	0.102846	0	0.0959189	0.0167564	3.84565
Tmem119	protein_coding	chr5:113793729-113800358	4177	4429	4001	1245	1344	1301	326.494	337.352	311.081	90.5134	75.0961	88.214	1.17256e-05	3.84096
LOC102640779	lncRNA	chr11:120229807-120232744	104	95	95	31	33	27	6.53414	5.81628	5.93708	1.81155	1.4821	1.47153	5.42377e-05	3.83774
Tom1	protein_coding	chr8:75033658-75070121	486	496	480	146	157	149	34.9294	34.7378	34.3155	9.75978	8.06606	9.28945	1.14885e-06	3.83483
Pdk4	protein_coding	chr6:5483351-5496278	365	410	486	119	174	105	18.2104	19.9332	24.1189	5.52212	6.20558	4.54427	0.00108624	3.82636
Perp	protein_coding	chr10:18845071-18857073	203	226	167	60	78	49	18.3966	19.9579	15.054	5.05737	5.05292	3.852	0.000936119	3.8252
Irs3	protein_coding	chr5:137643032-137645714	18	28	22	5	12	5	1.32689	2.01135	1.61317	0.34282	0.632343	0.31973	0.00540547	3.82381
E030003E18Rik	lncRNA	chr19:20492715-20556410	152	126	128	35	47	45	24.1344	19.4953	20.2161	5.16885	5.33455	6.19804	0.000440957	3.82277
Eml1	protein_coding	chr12:108371002-108539576	2416	2451	2430	752	853	671	78.2509	77.3575	78.2876	22.6539	19.7492	18.8523	1.0828e-06	3.81838
Gm22	protein_coding	chr8:122043131-122272650	1834	1951	1546	502	654	515	17.252	17.8839	14.4658	4.39214	4.39769	4.20239	0.000315546	3.81781
Zdhhc14	protein_coding	chr17:5492402-5753891	389	440	365	122	137	113	10.5006	11.574	9.80061	3.06308	2.64359	2.64602	0.000125396	3.81617
Pappa2	protein_coding	chr1:158711727-158980527	42	25	23	13	5	9	0.593565	0.344291	0.323326	0.170881	0.0505122	0.110334	0.0295496	3.80186
Gal3st2	protein_coding	chr1:93861344-93876494	222	197	213	69	74	55	13.4382	11.6204	12.8251	3.88481	3.20204	2.88802	0.000107559	3.79792
Anxa8	protein_coding	chr14:34085979-34100571	169	162	192	62	46	53	15.47	14.4506	17.4823	5.27871	3.01001	4.20851	0.000461316	3.79307
Unc5b	protein_coding	chr10:60762593-60831598	8036	8563	8000	2428	3196	2160	235.203	244.228	232.909	66.0973	66.8677	54.841	4.66728e-06	3.79295
Peg10	protein_coding	chr6:4747306-4760517	391	268	333	86	106	120	10.1034	6.74828	8.55915	2.06692	1.95797	2.68982	0.00332749	3.78436
Fam13c	protein_coding	chr10:70440084-70558736	835	767	904	251	256	276	34.7211	31.0792	37.3913	9.70765	7.60948	9.95557	0.000213791	3.7837
Csf1r	protein_coding	chr18:61096809-61131139	1016	935	1048	307	320	312	39.8796	35.7631	40.9178	11.208	8.97872	10.6233	7.49916e-05	3.7832
ENSMUSG00000104621.1	TEC	chr3:152250029-152252803	82	69	101	26	21	31	5.09065	4.17422	6.23699	1.50129	0.931936	1.66944	0.00396804	3.77848
Mir145a	miRNA	chr18:61647825-61647894	66	86	91	24	25	27	162.431	206.248	222.772	54.9375	43.9817	57.6418	0.00142687	3.77777
Camsap3	protein_coding	chr8:3587299-3609075	56	47	40	16	11	17	2.05177	1.67805	1.45779	0.545246	0.288098	0.540304	0.00275257	3.77651
Ucp2	protein_coding	chr7:100493358-100499629	420	344	360	108	143	107	42.6122	34.0103	36.3314	10.1916	10.3712	9.41712	0.000432995	3.76766
Casq1	protein_coding	chr1:172209894-172219895	25	38	27	15	5	7	2.29823	3.40411	2.46894	1.28256	0.328572	0.558213	0.011119	3.76671
Col19a1	protein_coding	chr1:24257683-24587535	33	33	41	8	12	14	0.474389	0.462276	0.586272	0.106965	0.123313	0.174581	0.00110356	3.76164
ENSMUSG00000110433.1	antisense	chr8:75037434-75045246	5	8	8	1	4	2	2.37949	3.70997	3.78703	0.442636	1.36076	0.825645	0.0102723	3.75669
2700069I18Rik	lncRNA	chr3:5177824-5220823	5	7	3	1	3	1	1.1015	1.50273	0.657403	0.204903	0.472438	0.191102	0.0376756	3.75573
Lmo7	protein_coding	chr14:101729928-101934708	130	144	145	42	44	46	2.92947	3.16209	3.25018	0.880293	0.70877	0.899191	3.56227e-05	3.75433
Cdh3	protein_coding	chr8:106510852-106556911	88	101	81	25	33	28	3.75532	4.20002	3.4383	0.992285	1.00667	1.0365	0.000229132	3.75352
Tmigd3	protein_coding	chr3:105870858-105924044	6	8	11	2	3	3	0.398017	0.517139	0.725835	0.123399	0.142259	0.172632	0.0143939	3.74407
Gm33869	protein_coding	chr12:46701066-46708839	59	46	63	17	16	20	1.32072	1.00342	1.40279	0.353948	0.256026	0.388362	0.00207606	3.73313
Wbscr17	protein_coding	chr5:130874951-131307522	462	448	453	165	165	104	14.7774	13.9637	14.4128	4.90877	3.77266	2.88562	7.55907e-05	3.73076
Hip1r	protein_coding	chr5:123973609-124003215	191	183	162	40	78	57	7.27977	6.79676	6.14177	1.418	2.12513	1.88455	0.000224662	3.72503
Sh3rf3	protein_coding	chr10:58812387-59138916	372	414	373	134	135	100	4.34926	4.71671	4.33786	1.45717	1.12827	1.0142	5.65124e-05	3.72366
Inpp5d	protein_coding	chr1:87620312-87720510	185	162	179	48	75	48	6.15863	5.25525	5.92734	1.48623	1.78476	1.38613	0.000139932	3.72359
Prkag2	protein_coding	chr5:24862735-25101041	663	644	646	185	230	211	23.0978	21.8629	22.3863	5.99461	5.72785	6.37658	2.19928e-06	3.72103
Setbp1	protein_coding	chr18:78750378-79109391	1992	1779	1869	572	608	622	34.4723	30.0002	32.1725	9.20683	7.52129	9.33729	7.71785e-05	3.70779
Zfp185	protein_coding	chrX:72987247-73031543	12	10	7	4	2	3	0.553346	0.449347	0.321076	0.171557	0.0659254	0.120001	0.0120041	3.70302
5430416O09Rik	lncRNA	chr4:43730034-43734534	17	15	21	8	7	2	0.716759	0.616286	0.88072	0.313723	0.210974	0.0731482	0.00658841	3.7029
Slc40a1	protein_coding	chr1:45908070-45926536	47	70	49	10	26	19	2.31804	3.36425	2.40389	0.45873	0.916652	0.812881	0.00562487	3.69525
Tgfb1i1	protein_coding	chr7:128246799-128255699	4133	4305	4183	1266	1575	1244	179.983	182.686	181.196	51.2782	49.0291	46.9933	9.01202e-08	3.69221
C230062I16Rik	misc_RNA	chr7:29960893-29969664	11	7	10	3	3	3	1.14296	0.708766	1.03355	0.289929	0.222826	0.270401	0.00603537	3.68416
Gale	protein_coding	chr4:135963681-135968178	232	266	181	63	82	75	19.7177	22.0301	15.3018	4.98015	4.98184	5.52942	0.00220536	3.68266
Pde5a	protein_coding	chr3:122729158-122859374	2260	1851	2197	601	792	660	49.017	39.1211	47.3983	12.124	12.2792	12.4174	0.000427137	3.68099
ENSMUSG00000105910.1	antisense	chr3:39008602-39009681	15	10	7	4	2	4	7.11881	4.62469	3.30452	1.76567	0.678505	1.64674	0.0354811	3.6784
Eya1	protein_coding	chr1:14168953-14310267	24	26	24	5	8	11	0.73491	0.775823	0.731019	0.142405	0.175114	0.29219	0.000336418	3.67676
Hhipl1	protein_coding	chr12:108305918-108328300	1055	1081	893	339	339	297	57.6985	57.6108	48.58	17.2443	13.2531	14.0902	0.000259217	3.67567
Arl5a	protein_coding	chr2:52397949-52424874	7158	6238	7138	1968	2506	2211	223.842	190.091	222.035	57.2411	56.0194	59.9774	0.000151357	3.67107
Adam12	protein_coding	chr7:133883199-134225097	2286	2399	2296	684	846	740	51.3122	52.4736	51.2638	14.2802	13.5744	14.4087	1.50063e-07	3.66866
Ank	protein_coding	chr15:27466677-27594909	1930	1913	1968	589	698	602	95.0517	91.8088	96.41	26.9806	24.5734	25.7187	1.48072e-06	3.66586
Trpv2	protein_coding	chr11:62574486-62600305	718	634	618	214	231	194	36.1783	31.13	30.9746	10.0293	8.32037	8.47958	0.000186042	3.66328
Adcy8	protein_coding	chr15:64699035-64922296	22	20	35	9	9	7	0.752144	0.666308	1.19026	0.286189	0.219952	0.207599	0.0183044	3.65498
Larp1b	protein_coding	chr3:40949720-41040207	262	281	247	81	90	86	3.66186	3.82713	3.43393	1.05298	0.899188	1.04267	2.89598e-05	3.64725
Peak1os	lncRNA	chr9:56241353-56330413	115	68	63	25	32	24	1.22023	0.703103	0.664934	0.246727	0.242717	0.220904	0.0250759	3.64366
Maf	protein_coding	chr8:115703253-115706894	860	841	889	264	306	277	40.68	38.7655	41.8291	11.615	10.3469	11.3661	7.26154e-06	3.63882
Ly86	protein_coding	chr13:37345345-37419036	9	15	12	2	5	5	1.55514	2.52572	2.06254	0.321433	0.617596	0.749457	0.00846898	3.63841
Rab3ip	protein_coding	chr10:116905780-116950460	773	760	770	242	273	238	35.1276	33.6549	34.806	10.2286	8.86827	9.38199	1.94017e-06	3.63738
Inhbb	protein_coding	chr1:119415465-119422248	1322	1493	1481	451	456	491	53.5247	58.9046	59.6448	16.9837	13.1976	17.2446	5.81204e-05	3.62827
Adgra1	protein_coding	chr7:139834090-139878088	4	3	5	2	2	0	0.142317	0.104013	0.176955	0.0661851	0.0508669	0	0.0245858	3.61621
Olfml2b	protein_coding	chr1:170644423-170682789	2922	2918	2965	935	1102	870	156.819	152.605	158.284	46.6726	42.2772	40.5029	1.45005e-06	3.61296
Slc4a2	protein_coding	chr5:24423761-24440947	4740	4481	4480	1531	1544	1417	149.914	138.104	140.941	45.0374	34.9076	38.8762	2.36383e-05	3.61013
Myo1d	protein_coding	chr11:80482126-80780055	3428	3479	3240	994	1264	1099	77.1872	76.3353	72.5678	20.8173	20.3451	21.466	3.04478e-06	3.61003
Rab3il1	protein_coding	chr19:10001674-10038380	114	135	126	25	53	48	4.58756	5.29392	5.04362	0.935729	1.52462	1.67559	0.000300229	3.60864
ENSMUSG00000086814.1	antisense	chr7:132154171-132155301	49	75	52	17	21	20	11.0202	16.437	11.633	3.55611	3.37614	3.90187	0.00540779	3.60806
Slc16a7	protein_coding	chr10:125219291-125389561	190	131	172	58	66	40	2.74392	1.84356	2.47082	0.779075	0.681349	0.501104	0.00366254	3.59837
Bricd5	protein_coding	chr17:24473884-24475471	14	9	13	2	4	6	2.41427	1.5124	2.22995	0.320789	0.493088	0.897548	0.0102223	3.59736
Cpxm2	protein_coding	chr7:132032687-132154763	1161	1373	1293	403	463	400	53.781	61.9774	59.5785	17.3634	15.3315	16.0733	7.27733e-05	3.59531
Gamt	protein_coding	chr10:80258151-80261026	152	150	121	46	45	48	23.8922	22.9758	18.9187	6.72516	5.05629	6.54489	0.000611732	3.58973
Pianp	protein_coding	chr6:124996720-125003096	13	35	24	8	10	6	0.807345	2.11812	1.48259	0.462103	0.443939	0.323234	0.0497435	3.5859
Gm36651	lncRNA	chr18:63050708-63068897	8	10	10	6	3	0	0.34097	0.415329	0.423956	0.237854	0.0914018	0	0.0186576	3.58462
Ddr1	protein_coding	chr17:35681567-35704630	4306	4446	4326	1390	1639	1326	123.164	123.921	123.081	36.9792	33.5117	32.9005	2.71853e-07	3.58024
2010111I01Rik	protein_coding	chr13:62964893-63326096	1083	1051	1046	307	383	369	20.4107	19.3018	19.609	5.38146	5.15983	6.0326	4.57731e-06	3.57921
Samd5	protein_coding	chr10:9262461-9676513	181	184	157	51	52	69	4.05011	4.01211	3.49448	1.06143	0.831762	1.33933	0.000278296	3.57514
Nrtn	protein_coding	chr17:56751323-56757530	114	108	89	21	47	38	17.7893	16.4227	13.8146	3.04793	5.24274	5.14383	0.00108501	3.57486
ENSMUSG00000048484.4	TEC	chr8:4677539-4678365	3	5	5	2	0	2	0.62494	1.01497	1.03605	0.387507	0	0.361407	0.024685	3.57312
Dstn	protein_coding	chr2:143915331-143943324	10784	10234	11594	3155	4181	3590	977.797	904.234	1045.67	266.073	270.992	282.366	6.8789e-05	3.57285
Bean1	protein_coding	chr8:104170372-104219098	54	50	37	14	17	16	2.24003	2.02114	1.52671	0.540159	0.5041	0.575745	0.00280316	3.57276
Pdlim5	protein_coding	chr3:142239585-142395696	13124	12580	13158	3957	4901	4134	315.026	294.257	314.169	88.3443	84.0953	86.0794	5.58236e-06	3.57209
D630041G03Rik	lncRNA	chr7:4467245-4470884	12	14	13	3	10	1	0.56794	0.645678	0.612011	0.132061	0.338321	0.0410554	0.0084859	3.5696
Omp	protein_coding	chr7:98143359-98145447	5	10	5	1	4	2	0.412339	0.80362	0.410155	0.0767038	0.235804	0.143075	0.0481565	3.5693
Zfyve28	protein_coding	chr5:34194893-34288475	46	69	56	13	18	26	0.526905	0.770177	0.638054	0.1385	0.147385	0.258343	0.00444528	3.55574
Spry1	protein_coding	chr3:37639947-37644599	1746	1757	1620	567	603	539	120.655	118.315	111.355	36.4432	29.7869	32.3101	1.59958e-05	3.55514
Kcns1	protein_coding	chr2:164163619-164171113	6	5	4	0	1	4	0.38114	0.309506	0.252748	0	0.0454088	0.220416	0.0423195	3.54894
Gm31365	lncRNA	chr5:142811779-142815997	190	162	173	61	74	43	9.78836	8.13276	8.86537	2.92293	2.72518	1.92165	0.00035343	3.53862
Gpr65	protein_coding	chr12:98268635-98276722	11	17	10	4	6	3	0.882639	1.32925	0.798151	0.298527	0.344151	0.208815	0.0132099	3.53501
Phyhipl	protein_coding	chr10:70557686-70599291	197	178	194	55	69	68	10.0349	8.83559	9.82981	2.60582	2.5125	3.00474	6.78101e-05	3.53319
Paqr8	protein_coding	chr1:20890622-20939650	424	406	433	125	169	135	13.462	12.5613	13.6749	3.69135	3.83563	3.71814	1.03118e-05	3.53026
Plpp1	protein_coding	chr13:112800777-112867894	4964	4542	4935	1571	1782	1520	484.518	432.008	479.137	142.622	124.335	128.698	4.54366e-05	3.52748
Cldn22	protein_coding	chr8:47824482-47825475	8	8	5	2	2	3	1.38652	1.35112	0.861987	0.322403	0.247784	0.451031	0.00869968	3.52483
Arhgef26	protein_coding	chr3:62338777-62462221	61	49	61	19	11	26	2.01898	1.58039	2.00829	0.584909	0.260257	0.746491	0.00275122	3.52316
Sybu	protein_coding	chr15:44671856-44788074	24	17	22	5	5	11	0.726133	0.501211	0.662098	0.140704	0.108139	0.2887	0.00659899	3.51496
Crct1	protein_coding	chr3:93014205-93015686	23	38	44	12	16	8	5.52626	8.8972	10.516	2.68174	2.74809	1.66741	0.0170064	3.51396
Hsd17b7	protein_coding	chr1:169949535-169969240	1202	1145	1196	363	411	426	37.0902	34.4292	36.7097	10.4182	9.06576	11.4029	1.77351e-05	3.50405
Trem2	protein_coding	chr17:48346401-48352276	145	144	141	54	39	50	21.7975	21.0944	21.0839	7.5503	4.19093	6.52014	0.000117535	3.50334
Lipg	protein_coding	chr18:74939322-74961263	21	24	21	6	11	6	0.879382	0.979346	0.874726	0.233691	0.329275	0.217951	0.000181652	3.50031
Asap1	protein_coding	chr15:64086840-64382919	6200	6106	6285	1987	2282	2051	142.528	136.783	143.717	42.4854	37.5001	40.9	2.64217e-06	3.49941
Gm29376	protein_coding	chr1:134513428-134527571	12	10	10	2	4	5	0.580703	0.471562	0.481357	0.0900192	0.138369	0.20989	0.00176956	3.49919
Fbln5	protein_coding	chr12:101746565-101819130	12186	13360	11850	3961	4702	4100	341.301	364.628	330.133	103.184	94.1384	99.6116	1.95314e-05	3.4892
Pde3a	protein_coding	chr6:141249269-141506862	3485	3286	3523	1085	1415	1038	43.7307	40.1807	43.9735	12.6633	12.6925	11.2987	2.03582e-05	3.48892
Gm8399	pseudogene	chr13:81064604-81066200	86	94	149	25	46	43	9.27718	9.88125	15.9882	2.50836	3.54718	4.02379	0.0188414	3.487
Rab27a	protein_coding	chr9:73044810-73097623	71	62	83	24	21	28	3.06555	2.6086	3.56469	0.963815	0.648151	1.04871	0.00190579	3.47236
Rab31	protein_coding	chr17:65651726-65772752	2375	2371	2358	727	973	755	117.708	114.509	116.247	33.5127	34.4717	32.4593	1.82441e-07	3.46925
Fgf5	protein_coding	chr5:98254184-98277033	41	47	23	11	19	9	2.8208	3.15103	1.57402	0.703904	0.934435	0.537131	0.0222557	3.46861
Rab27b	protein_coding	chr18:69979131-70141633	179	198	147	50	59	70	4.08278	4.40083	3.33515	1.06073	0.961972	1.385	0.00118918	3.46824
Plxnc1	protein_coding	chr10:94790866-94945275	261	249	263	78	81	104	5.43303	5.05089	5.44568	1.51018	1.2053	1.87795	8.55269e-05	3.46791
ENSMUSG00000086717.1	antisense	chr8:115705078-115707233	149	131	140	40	66	41	58.3386	49.9813	54.5246	14.5667	18.4723	13.9253	0.000160583	3.46741
St6galnac2	protein_coding	chr11:116676703-116695234	72	70	54	17	32	20	4.58043	4.33949	3.41713	1.0059	1.45523	1.10371	0.00153207	3.46076
Rab40b	protein_coding	chr11:121356121-121388251	69	68	67	25	20	24	6.37372	6.12095	6.1562	2.14791	1.32063	1.92311	6.94937e-05	3.45921
Edar	protein_coding	chr10:58600780-58675696	3	3	3	2	1	0	0.129725	0.126413	0.129038	0.0804389	0.0309108	0	0.0176526	3.45916
Jph2	protein_coding	chr2:163336242-163398049	3903	4072	3665	1239	1535	1246	141.08	143.431	131.776	41.6555	39.6629	39.0693	1.107e-05	3.45789
Ell3	protein_coding	chr2:121439027-121442601	13	11	11	4	4	4	1.33786	1.10313	1.12604	0.382878	0.294262	0.357089	0.000438964	3.44898
ENSMUSG00000097901.7	processed_transcript	chr14:6684255-6783942	7	8	12	4	2	3	0.419598	0.467296	0.715503	0.223012	0.0856985	0.155993	0.0191833	3.44821
Gm39938	lncRNA	chr2:131537662-131561060	13	7	8	4	0	5	0.296005	0.155318	0.181193	0.0847128	0	0.0987587	0.0479084	3.44749
Tnrc18	protein_coding	chr5:142724604-142822705	7250	7495	6449	2389	2759	2179	98.6256	99.355	87.2647	30.2274	26.8294	25.7133	8.30888e-05	3.44624
Dhcr24	protein_coding	chr4:106561038-106589113	1503	1386	1441	539	527	422	64.2824	57.7647	61.3044	21.4415	16.1121	15.6565	8.0939e-05	3.44581
9330188P03Rik	lncRNA	chr14:105589549-105593929	3	3	2	0	2	1	0.477657	0.465461	0.316752	0	0.227632	0.138116	0.0238543	3.44464
Col8a1	protein_coding	chr16:57624256-57754737	21907	20917	21648	6521	8695	7232	738.558	687.175	725.962	204.479	209.546	211.5	5.27597e-06	3.43983
9530020I12Rik	lncRNA	chr12:11185993-11204502	4	4	3	0	2	2	0.301708	0.294004	0.225083	0	0.107836	0.13086	0.0146372	3.43866
Col12a1	protein_coding	chr9:79598987-79719599	49194	46955	45944	15206	18477	15685	672.825	625.804	625.048	193.436	180.646	186.09	9.67365e-06	3.43408
Dynll1	protein_coding	chr5:115297110-115300990	2444	2569	2603	806	1098	761	208.333	213.396	220.711	63.9034	66.9061	56.2717	5.90395e-06	3.43402
Mafb	protein_coding	chr2:160363677-160367065	286	324	287	114	103	91	14.5384	16.0495	14.512	5.39	3.74279	4.01275	0.000121543	3.43082
Nap1l3	protein_coding	chrX:122394560-122397385	44	51	32	25	9	8	2.68227	3.02961	1.94042	1.4175	0.392193	0.423048	0.0178144	3.42731
Hist2h2be	protein_coding	chr3:96221072-96223738	24	21	29	6	10	10	1.55028	1.32186	1.86334	0.360482	0.46175	0.560336	0.00260538	3.42513
ENSMUSG00000085705.1	processed_transcript	chr17:13675662-13683516	15	12	13	3	5	6	2.23734	1.74417	1.92876	0.416193	0.533111	0.776321	0.00145455	3.425
Igsf9b	protein_coding	chr9:27299090-27357549	881	885	786	270	334	286	8.38671	8.20967	7.44274	2.39063	2.27284	2.36174	4.13479e-05	3.42184
ENSMUSG00000107868.1	TEC	chr6:122811170-122813537	8	9	11	3	5	2	0.58201	0.638043	0.796027	0.202999	0.260027	0.126218	0.00314966	3.42147
Gm40449	lncRNA	chr7:99300274-99304493	10	5	9	3	1	4	1.31107	0.638798	1.17372	0.365832	0.0937205	0.454922	0.0337582	3.41573
Pdzrn3	protein_coding	chr6:101149607-101377897	3723	3773	3524	1220	1362	1271	142.181	140.412	133.869	43.3354	37.1821	42.1061	6.37795e-06	3.39626
Itga3	protein_coding	chr11:95044475-95076811	204	201	225	81	69	68	6.62347	6.35943	7.26662	2.44609	1.60144	1.9152	0.000199514	3.39601
Pxylp1	protein_coding	chr9:96823336-96892688	1129	1057	1128	346	461	364	50.3882	45.9702	50.0771	14.363	14.7077	14.0924	1.78963e-05	3.39261
Uap1l1	protein_coding	chr2:25361489-25366097	1205	1250	1152	384	529	368	95.3567	96.3919	90.6799	28.2636	29.9245	25.2616	7.53735e-06	3.38441
Eps8l2	protein_coding	chr7:141338911-141363020	164	144	144	42	71	49	8.79338	7.52386	7.68013	2.09457	2.72131	2.27907	0.000215958	3.38232
Arsi	protein_coding	chr18:60912240-60919506	259	304	217	75	111	91	11.3304	12.9595	9.4428	3.05169	3.47118	3.45333	0.00151295	3.38132
Grk4	protein_coding	chr5:34660379-34755305	81	89	81	26	35	28	2.74097	2.93478	2.72646	0.818325	0.846632	0.821915	8.29281e-06	3.37863
Gm8789	pseudogene	chr19:24289000-24290908	4	3	4	1	2	1	0.392426	0.286804	0.390348	0.0912496	0.140261	0.0851035	0.00299581	3.37818
Gm33938	lncRNA	chr5:76158260-76169219	79	67	56	30	22	18	5.1011	4.21578	3.59682	1.80173	1.01547	1.00823	0.00402146	3.37575
Wtip	protein_coding	chr7:34109541-34133317	961	1030	883	325	361	326	71.2683	74.435	65.1371	22.4176	19.1376	20.972	6.84491e-05	3.37198
Tnni2	protein_coding	chr7:142440490-142444410	4	4	3	1	2	1	0.335983	0.327404	0.250653	0.0781249	0.120087	0.0728629	0.00228805	3.37191
Was	protein_coding	chrX:8081466-8090491	25	35	27	7	12	12	2.05677	2.80595	2.20955	0.535645	0.705723	0.8564	0.0025486	3.37133
Ap3d1	protein_coding	chr10:80706956-80742284	4125	4124	3944	1367	1615	1330	135.669	132.173	129.029	41.8175	37.9697	37.9453	2.2673e-06	3.37096
Pmvk	protein_coding	chr3:89454541-89469009	134	170	145	51	50	56	13.5395	16.7384	14.5734	4.79293	3.6114	4.90835	0.00051835	3.36907
Rem1	protein_coding	chr2:152627008-152635191	206	264	238	82	103	67	22.1389	27.6477	25.4425	8.19664	7.91286	6.24616	0.000502732	3.36511
Dag1	protein_coding	chr9:108204861-108263958	9210	9184	8768	3020	3615	3000	266.172	258.644	252.057	81.1789	74.6825	75.2097	2.39769e-06	3.36205
Ppp1r14a	protein_coding	chr7:29289320-29293390	308	309	292	100	118	104	99.926	97.6907	94.2335	30.1759	27.3664	29.2692	3.21412e-06	3.36188
Nacc2	protein_coding	chr2:26055535-26122811	2355	2240	2314	712	946	805	57.8178	53.5902	56.5105	16.2586	16.6024	17.1442	6.61753e-06	3.35803
Prkg1	protein_coding	chr19:30564487-31765309	1715	1464	1612	563	621	514	39.3359	32.7214	36.7777	12.0106	10.1818	10.2267	0.000226644	3.35712
LOC102638515	protein_coding	chr2:164485529-164486870	12	20	11	4	4	7	1.67122	2.71425	1.52384	0.518138	0.398217	0.845669	0.0254653	3.35371
Epb41l4b	protein_coding	chr4:56992043-57143168	75	45	50	34	14	10	1.52798	0.893381	1.01326	0.644272	0.203889	0.176729	0.031191	3.35122
Carmn	lncRNA	chr18:61645878-61665538	384	378	353	123	170	108	48.7499	46.7629	44.5771	14.5238	15.4276	11.8937	3.40604e-05	3.34782
Kcnab1	protein_coding	chr3:64949049-65378225	277	240	308	90	101	102	10.8111	9.12784	11.9574	3.26712	2.81786	3.45334	0.000904048	3.34402
Smtn	protein_coding	chr11:3517522-3539654	5071	5183	4563	1791	2023	1470	194.049	193.27	173.685	63.7449	55.3376	48.7959	7.90719e-05	3.34173
Nrp1	protein_coding	chr8:128358283-128505476	3386	3421	3559	1141	1226	1306	87.9161	86.5568	91.9187	27.555	22.7551	29.4154	1.68604e-05	3.34136
Emp1	protein_coding	chr6:135362550-135383173	8832	9050	8959	2739	4008	2926	470.917	470.22	475.16	135.835	152.764	135.335	6.1943e-07	3.34085
ENSMUSG00000112336.1	antisense	chr12:80259443-80260557	393	646	453	169	209	155	92.1144	147.548	105.616	36.843	35.0178	31.5149	0.00858249	3.34003
ENSMUSG00000097183.2	lincRNA	chr3:145650312-145677580	539	512	570	156	206	217	43.5945	40.3533	45.8577	11.7355	11.9102	15.2248	0.00010194	3.33944
Col4a2	protein_coding	chr8:11312805-11449287	44021	49322	41421	15609	17972	14473	1175.77	1283.72	1100.47	387.767	343.136	335.329	0.000116855	3.33882
Tox	protein_coding	chr4:6686353-6991552	15	11	13	6	6	2	0.56844	0.406212	0.490039	0.211484	0.162537	0.0657465	0.00575578	3.3306
Gabra4	protein_coding	chr5:71569729-71658308	21	20	19	11	7	3	0.876399	0.813354	0.788735	0.426981	0.208828	0.108606	0.00406343	3.32945
Gal3st1	protein_coding	chr11:3983636-3999328	54	64	69	18	29	21	4.45539	5.14563	5.66286	1.38133	1.7104	1.50301	0.000606482	3.32204
Fgd3	protein_coding	chr13:49263110-49320469	638	668	783	226	237	280	20.5059	20.9219	25.0331	6.75615	5.4452	7.80666	0.000634957	3.32171
H19	lncRNA	chr7:142575530-142578146	219	279	279	94	102	82	16.4896	20.4709	20.8961	6.58305	5.49002	5.35587	0.000758029	3.31957
Clec11a	protein_coding	chr7:44303766-44306959	264	331	274	85	151	83	23.2519	28.4085	24.0048	6.96314	9.50688	6.34134	0.000718082	3.31699
Rassf2	protein_coding	chr2:131992850-132030319	92	96	106	34	41	31	2.92153	2.97071	3.34829	1.00423	0.930709	0.853953	0.000109634	3.31333
Itih3	protein_coding	chr14:30908572-30923755	6	7	12	2	3	4	0.324639	0.369075	0.64584	0.10065	0.116032	0.187741	0.0400578	3.31226
Cd300e	protein_coding	chr11:115051917-115066676	6	12	14	5	2	4	0.471987	0.919869	1.09547	0.365832	0.112465	0.272953	0.0442959	3.31092
Actn1	protein_coding	chr12:80167542-80260485	31854	31700	30420	10681	12514	10632	1302.55	1263.16	1237.33	406.234	365.792	377.134	2.48474e-06	3.30941
Zc2hc1a	protein_coding	chr3:7503415-7553848	2493	2149	2583	798	1006	814	123.096	103.401	126.865	36.6486	35.5081	34.8654	0.000354616	3.30176
Prune2	protein_coding	chr19:16955670-17223932	439	435	504	147	166	182	4.8113	4.64572	5.49443	1.49847	1.30051	1.73029	0.000270508	3.30108
Rragb	protein_coding	chrX:153139792-153190192	18	13	25	4	5	11	0.948593	0.667602	1.31052	0.196065	0.188358	0.502863	0.0331496	3.2985
Hnmt	protein_coding	chr2:24002911-24049758	66	42	87	19	27	25	6.00325	3.7227	7.87148	1.60742	1.75555	1.97257	0.0274303	3.29815
Sfn	protein_coding	chr4:133600556-133602168	98	75	71	31	21	34	10.4668	7.80577	7.54295	3.07952	1.6033	3.15004	0.00484067	3.2958
Ppef1	protein_coding	chrX:160622419-160751290	47	43	23	5	24	14	2.22321	1.98206	1.08219	0.219981	0.811524	0.57446	0.0339362	3.29239
Mical2	protein_coding	chr7:112225836-112355194	12441	12504	12056	4161	5078	4192	290.811	284.82	280.319	90.466	84.8506	85.0013	6.16215e-07	3.28809
Hip1	protein_coding	chr5:135406518-135545320	5113	4968	5050	1697	2071	1731	101.69	96.2836	99.9057	31.392	29.4437	29.8642	2.17956e-06	3.28424
Tmem150a	protein_coding	chr6:72355483-72359762	726	841	743	227	358	264	82.8289	93.4992	84.3197	24.0882	29.1968	26.1276	7.81828e-05	3.2822
LOC108168067	protein_coding	chr13:21813170-21819385	339	323	294	113	135	100	25.6935	23.8557	22.1649	7.96589	7.31416	6.57465	0.000109983	3.2814
Bin2	protein_coding	chr15:100641082-100669570	32	35	33	4	14	19	2.30661	2.45844	2.3661	0.268174	0.721373	1.18803	0.00358061	3.27481
Actg1	protein_coding	chr11:120345687-120348495	59161	59143	56833	19422	25274	19367	5218.62	5083.82	4986.72	1593.48	1593.68	1481.94	1.3283e-06	3.27454
Colq	protein_coding	chr14:31523082-31577863	14	10	10	4	8	1	0.616842	0.429351	0.438268	0.163923	0.251967	0.0382204	0.0168748	3.26895
Gm3902	misc_RNA	chr10:53597378-53598402	3	3	3	2	0	1	0.50422	0.491345	0.50155	0.312652	0	0.145797	0.0186255	3.26561
Gm11816	lncRNA	chr4:9282226-9287510	19	21	21	5	6	11	1.03159	1.11106	1.13414	0.252496	0.232869	0.518077	0.00145326	3.26555
Sprn	protein_coding	chr7:140150628-140154659	4	4	5	1	3	1	0.218346	0.212771	0.271488	0.0507713	0.117062	0.0473516	0.00524311	3.26513
Ehd2	protein_coding	chr7:15946963-15967535	10730	10572	10285	3603	4338	3601	361.532	347.113	344.703	112.913	104.483	105.249	2.06244e-06	3.26473
Csdc2	protein_coding	chr15:81936759-81950941	109	111	117	32	48	44	7.54136	7.48364	8.05199	2.05924	2.37395	2.64074	2.70594e-05	3.26226
Sox8	protein_coding	chr17:25565893-25570686	31	26	28	12	12	7	1.78077	1.45541	1.59992	0.641151	0.492759	0.348814	0.00090309	3.26163
Gstm6	protein_coding	chr3:107938847-107953483	27	32	31	13	14	6	3.13861	3.62486	3.58452	1.40556	1.16335	0.605027	0.00108387	3.2603
C530008M17Rik	protein_coding	chr5:76657779-76873554	316	356	294	101	125	127	6.37234	6.99566	5.89731	1.89438	1.8019	2.2216	0.000202791	3.25545
Ptms	protein_coding	chr6:124913675-124917946	5675	6652	5587	2058	2561	1962	846.46	966.851	828.922	285.508	273.06	253.857	0.000161491	3.25228
Spats2l	protein_coding	chr1:57774162-57948398	123	111	157	39	65	42	4.53647	3.98935	5.75979	1.33786	1.71369	1.34373	0.00359144	3.25022
Myh9	protein_coding	chr15:77760585-77842175	89142	91627	81628	30548	37747	28269	2065.49	2068.86	1881.37	658.35	625.218	568.2	3.26602e-05	3.24864
Actn4	protein_coding	chr7:28893248-28962354	28217	28198	26476	9663	11510	9267	1202.35	1170.86	1122.19	382.969	350.592	342.537	6.82951e-06	3.24821
Rassf3	protein_coding	chr10:121410350-121476250	1260	1259	1168	405	474	472	57.0028	55.5032	52.5609	17.0417	15.3289	18.5232	1.8436e-05	3.24335
Rgs14	protein_coding	chr13:55369712-55384691	14	15	12	7	6	2	1.01041	1.05494	0.861481	0.469895	0.309549	0.125213	0.00429535	3.2353
Icam2	protein_coding	chr11:106377656-106388123	18	16	9	4	12	1	1.97136	1.70758	0.980462	0.407462	0.939469	0.0950043	0.0496856	3.23135
ENSMUSG00000112161.1	lincRNA	chr10:119135164-119166385	2	3	3	0	1	2	0.348735	0.509745	0.520333	0	0.124644	0.302514	0.037871	3.22788
Lbh	protein_coding	chr17:72918305-72941946	12078	11863	11938	3944	5547	3889	678.207	649.125	666.796	205.986	222.655	189.432	3.60692e-06	3.22636
Sync	protein_coding	chr4:129287536-129309386	440	451	355	137	157	165	22.5598	22.5334	18.1053	6.53336	5.75427	7.33866	0.000721615	3.2201
Gm14005	lncRNA	chr2:128298663-128429351	311	329	305	112	110	124	11.9273	12.2955	11.6353	3.99515	3.01566	4.12528	3.24361e-05	3.21999
Cd93	protein_coding	chr2:148436651-148443535	533	476	390	159	217	147	13.8329	12.0381	10.068	3.83809	4.0258	3.30942	0.00173459	3.21651
Kctd10	protein_coding	chr5:114363572-114380505	8419	8699	8634	2976	3629	2956	468.168	471.386	477.582	153.924	144.257	142.592	2.16047e-07	3.21512
Tnk2os	lncRNA	chr16:32665223-32668197	36	37	25	14	7	14	4.45539	4.46223	3.07764	1.61155	0.619282	1.50301	0.00781469	3.21258
Myh1	protein_coding	chr11:67200109-67224575	42	40	34	20	1	19	1.20112	1.11472	0.967188	0.531986	0.020443	0.471347	0.0126658	3.20678
Gjb3	protein_coding	chr4:127325235-127330836	87	109	116	35	43	38	7.79809	9.52055	10.3424	2.9179	2.75515	2.95462	0.00108189	3.20609
Spsb2	protein_coding	chr6:124808574-124810619	212	250	212	70	81	98	24.0437	27.6294	23.9164	7.38407	6.56685	9.6414	0.000341996	3.20398
Adrb1	protein_coding	chr19:56722372-56724862	5	7	7	4	3	0	0.345795	0.471752	0.48155	0.257301	0.148312	0	0.0261547	3.20279
Lrp2	protein_coding	chr2:69424335-69586067	187	171	207	63	80	68	2.08285	1.856	2.29341	0.652664	0.636962	0.657014	0.000349795	3.20155
Itgb5	protein_coding	chr16:33829665-33949338	11151	11534	11122	4006	4606	3960	585.326	589.971	580.713	195.581	172.828	180.314	6.1648e-07	3.20017
Map7d2	protein_coding	chrX:159414524-159498958	26	27	27	13	8	8	1.02498	1.03722	1.05876	0.476669	0.225444	0.273578	0.000771122	3.19872
ENSMUSG00000102234.1	antisense	chr1:182484179-182492473	26	20	17	4	10	10	3.2201	2.41375	2.0943	0.460774	0.885325	1.07435	0.0097023	3.19286
Hcn4	protein_coding	chr9:58823512-58860955	32	24	33	11	11	11	1.4515	1.06083	1.48894	0.46408	0.356671	0.432822	0.00286346	3.19189
Agt	protein_coding	chr8:124556587-124569707	130	80	177	50	56	39	12.1782	7.30293	16.4933	4.35656	3.75004	3.16924	0.0370852	3.19041
Klhl33	protein_coding	chr14:50888581-50897652	36	49	49	14	23	14	1.09594	1.4536	1.48379	0.396409	0.500516	0.369709	0.00213328	3.18429
Mpp4	protein_coding	chr1:59120935-59163389	34	28	44	18	12	9	1.89743	1.52269	2.44249	0.93431	0.478712	0.43569	0.0126321	3.17118
F8	protein_coding	chrX:75170344-75383525	79	90	88	36	35	25	1.16432	1.29257	1.2901	0.493492	0.36874	0.31962	0.000215547	3.17043
Myo1c	protein_coding	chr11:75650529-75674643	23788	24183	22505	8541	10314	7704	694.825	688.326	653.87	232.038	215.354	195.202	9.63249e-06	3.17
2810001G20Rik	lncRNA	chr11:64079484-64083259	33	33	34	9	15	14	6.30974	6.14863	6.46653	1.60056	2.0502	2.32207	4.70376e-05	3.1685
ENSMUSG00000104605.1	TEC	chr3:37638579-37640656	148	181	114	54	60	52	12.2698	14.6225	9.40105	4.16393	3.55579	3.73964	0.00552688	3.16714
Timp2	protein_coding	chr11:118301061-118355411	35978	38938	35936	13681	15139	12783	1711.24	1804.74	1700.19	605.236	514.729	527.419	1.07207e-05	3.16634
Izumo4	protein_coding	chr10:80702009-80705382	213	235	222	84	72	92	21.0043	22.5821	21.7759	7.70445	5.07539	7.86986	0.000124348	3.16529
Pmepa1	protein_coding	chr2:173224458-173276533	6134	6281	6003	2225	2580	2128	227.157	226.662	221.129	76.6383	68.2983	68.3603	1.3872e-06	3.16436
Cxxc5	protein_coding	chr18:35829356-35861691	1333	1297	1307	520	553	407	58.4928	55.4599	57.0482	21.2231	17.3462	15.4923	3.34795e-05	3.16308
Plekhg2	protein_coding	chr7:28359603-28372688	3252	3481	3040	1123	1428	1148	93.3887	97.4124	86.8384	29.9955	29.3143	28.5979	3.44237e-05	3.1583
Fgf2	protein_coding	chr3:37348477-37404893	625	722	758	251	334	216	111.346	125.343	134.326	41.5913	42.5353	33.381	0.000316579	3.15737
Camk4	protein_coding	chr18:32934961-33195767	24	22	31	7	15	8	0.321159	0.286879	0.412634	0.0871244	0.143485	0.0928642	0.0050298	3.15534
Zfp457	protein_coding	chr13:67288137-67306412	5	4	5	1	0	4	0.327146	0.255034	0.325414	0.0608562	0	0.227029	0.0453043	3.15263
Jup	protein_coding	chr11:100368856-100397805	1268	1147	1025	406	440	449	41.0688	36.2012	33.0226	12.2307	10.1871	12.615	0.000519349	3.14826
Gm35365	lncRNA	chr11:103843848-103846116	11	7	8	2	4	4	0.848646	0.526258	0.613929	0.143515	0.220598	0.267697	0.0116969	3.14784
Arxes2	protein_coding	chrX:135993820-135995359	163	148	198	70	52	67	18.2343	16.1336	22.0324	7.28337	4.15827	6.50168	0.00285143	3.14324
Myo1h	protein_coding	chr5:114288899-114364576	2116	2237	2158	751	956	771	70.7421	72.8777	71.7643	23.3526	22.8469	22.3597	2.23382e-07	3.14158
Cd200	protein_coding	chr16:45382111-45409061	814	813	897	262	381	322	58.9457	57.37	64.6123	17.6466	19.7224	20.2271	6.12755e-05	3.14132
Tlr13	protein_coding	chrX:106143275-106160493	157	139	141	44	63	60	6.73821	5.81335	6.01948	1.75643	1.93283	2.23381	0.000175884	3.13538
Snapc5	protein_coding	chr9:64179297-64182688	197	204	199	69	83	76	44.5968	45.0023	44.8111	14.5285	13.4315	14.9245	3.14124e-07	3.13424
Prdm6	protein_coding	chr18:53463583-53575904	906	975	788	349	359	301	19.7471	20.7084	17.0843	7.07512	5.59342	5.69104	0.000385098	3.13405
Moxd1	protein_coding	chr10:24223517-24302783	56	59	51	15	26	23	3.12923	3.21268	2.83474	0.779602	1.03856	1.11487	0.000169465	3.12872
Vit	protein_coding	chr17:78508051-78627409	105	119	112	37	63	31	3.51172	3.87833	3.72601	1.15097	1.50619	0.899377	0.000254734	3.12553
Hist1h2be	protein_coding	chr13:23583670-23621124	34	25	28	9	16	9	2.33361	1.67207	1.91162	0.574545	0.785012	0.535847	0.00299761	3.12192
Pik3r1	protein_coding	chr13:101680761-101768217	3274	3004	3260	1157	1261	1210	56.3296	50.3645	55.7918	18.515	15.5089	18.059	6.49187e-05	3.11976
Gm11747	lncRNA	chr11:118444200-118454995	167	167	147	66	50	64	17.4575	17.0117	15.2854	6.41715	3.73631	5.80356	0.00042302	3.11804
ENSMUSG00000102900.1	TEC	chr2:13009886-13012486	69	72	56	25	27	23	4.57016	4.64709	3.68948	1.54012	1.27836	1.32148	0.000775974	3.1176
Cyp51	protein_coding	chr5:4080674-4104697	1612	1378	1610	565	645	549	63.7968	53.1434	63.3803	20.7977	18.2474	18.8476	0.00033336	3.11474
Emp3	protein_coding	chr7:45918023-45921426	1860	1986	2047	663	866	735	329.662	343.006	360.885	109.296	109.719	113.004	1.37437e-05	3.11294
ENSMUSG00000092258.2	sense_intronic	chr9:44107301-44108879	835	891	869	335	361	295	221.99	230.83	229.806	82.8371	68.606	68.0329	1.02175e-05	3.11025
4930562F07Rik	lncRNA	chr1:160074735-160077985	22	18	10	8	7	4	4.27289	3.40673	1.93194	1.44518	0.971861	0.67392	0.0390957	3.10957
Arsg	protein_coding	chr11:109473334-109573330	165	147	176	58	71	59	4.14909	3.60207	4.40226	1.35653	1.27625	1.28697	0.000320108	3.10056
Akap6	protein_coding	chr12:52699013-53155568	246	252	234	105	91	82	2.6441	2.63943	2.50181	1.0497	0.699185	0.764551	0.000115645	3.09749
Ahnak2	protein_coding	chr12:112772190-112802681	4426	4758	3920	1617	1816	1595	67.0379	70.2264	59.0595	22.7799	19.6622	20.9565	0.000209957	3.09666
Gm4473	misc_RNA	chr10:120899132-120904676	93	92	73	35	31	32	4.61717	4.4509	3.60504	1.6162	1.10018	1.37814	0.00118292	3.09515
Foxp2	protein_coding	chr6:14901349-15441977	940	754	914	322	338	339	22.6488	17.7033	21.9057	7.21614	5.82158	7.08542	0.000934491	3.09384
Sspn	protein_coding	chr6:145931873-145965225	1115	1029	1129	407	495	366	41.3623	37.1974	41.6599	14.0429	13.1263	11.7777	6.84876e-05	3.08675
Amigo2	protein_coding	chr15:97244074-97247287	17	41	32	9	14	12	0.911225	2.14154	1.70617	0.448696	0.536429	0.557965	0.0414147	3.08403
Plxdc1	protein_coding	chr11:97923237-97986668	31	25	44	18	7	12	1.5099	1.18657	2.13174	0.815441	0.243721	0.507012	0.0280898	3.08281
Nudt6	protein_coding	chr3:37404982-37420186	955	986	1042	399	412	337	90.5463	91.0985	98.272	35.1863	27.9237	27.717	5.56567e-05	3.08187
Slc30a1	protein_coding	chr1:191906689-191913247	374	353	372	123	147	154	12.0005	11.0375	11.8732	3.67085	3.37174	4.28646	4.13947e-05	3.08156
Prnp	protein_coding	chr2:131909928-131938436	5115	5082	4870	1694	2331	1844	236.117	228.603	223.617	72.7323	76.9185	73.8399	2.26025e-06	3.07993
Ifitm10	protein_coding	chr7:142325835-142373779	54	64	65	21	27	23	1.65531	1.91176	1.98196	0.59874	0.59164	0.611594	0.000231232	3.07941
Fam20a	protein_coding	chr11:109672926-109722512	1169	1283	1086	449	474	439	70.564	75.4678	65.2068	25.2085	20.4529	22.987	0.000129666	3.07711
Capn12	protein_coding	chr7:28881450-28893585	445	394	399	135	187	161	25.1517	21.7005	22.4324	7.09699	7.55538	7.89374	0.00013179	3.07302
ENSMUSG00000087443.1	antisense	chr17:35860918-35866886	19	22	17	6	5	11	4.17503	4.71081	3.71578	1.22628	0.785387	2.09676	0.00415697	3.06726
Gm40755	protein_coding	chr10:108322372-108332733	32	39	42	12	10	21	0.752396	0.893568	0.982291	0.262428	0.168075	0.428317	0.00433712	3.06031
Sac3d1	protein_coding	chr19:6116004-6118586	398	404	390	140	194	135	49.9021	49.361	48.6401	16.3266	17.3878	14.6831	2.79533e-06	3.056
Ptpn7	protein_coding	chr1:135131837-135145328	76	74	79	22	34	34	3.5348	3.3539	3.65488	0.951715	1.13041	1.37177	9.45288e-05	3.05266
Gm30881	lncRNA	chr16:93808397-93833516	6	8	8	3	0	5	0.643618	0.836245	0.853614	0.299317	0	0.465261	0.0262034	3.05198
Aldh4a1	protein_coding	chr4:139622871-139649691	663	716	649	223	315	260	30.7783	32.39	29.9689	9.62874	10.4532	10.4702	1.06888e-05	3.04847
Tldc2	protein_coding	chr2:157075254-157096948	20	25	15	9	7	7	0.393547	0.479372	0.293597	0.164718	0.0984627	0.119485	0.0102328	3.04839
Rian	lncRNA	chr12:109603945-109661716	5206	4850	5164	1780	2298	1897	250.241	227.176	246.908	79.5806	78.9609	79.099	2.2975e-05	3.04799
Cnnm2	protein_coding	chr19:46761564-46878580	567	549	563	214	230	211	16.8675	15.915	16.6599	5.92128	4.89107	5.44504	1.17768e-05	3.04123
Zfp651	protein_coding	chr9:121759309-121771742	1205	1185	1166	470	484	432	31.5584	30.2422	30.3754	11.4488	9.06111	9.81435	1.48233e-05	3.03968
St8sia2	protein_coding	chr7:73939119-74013727	11	17	10	4	6	5	0.349571	0.526452	0.31611	0.118232	0.136302	0.137836	0.0152683	3.03829
C1qtnf5	protein_coding	chr9:44101770-44109187	2989	3358	3092	1156	1423	1142	120.452	131.866	123.943	43.3288	40.992	39.921	1.83569e-05	3.02845
Mfrp	protein_coding	chr9:44101770-44109187	2989	3358	3092	1156	1423	1142	120.452	131.866	123.943	43.3288	40.992	39.921	1.83569e-05	3.02845
C1qtnf1	protein_coding	chr11:118428457-118451782	1319	1390	1273	507	546	507	41.732	42.8554	40.0634	14.9199	12.3488	13.915	1.46887e-05	3.02671
Gm36819	lncRNA	chr15:59823417-59831605	3	5	5	1	1	3	0.144526	0.234726	0.239601	0.0448082	0.0344376	0.125371	0.0307465	3.02446
ENSMUSG00000087515.1	antisense	chr2:26059010-26060275	77	75	45	14	44	23	27.8096	26.3956	16.1663	4.70289	11.3596	7.20578	0.0193821	3.02435
Pea15a	protein_coding	chr1:172196728-172206781	7885	8048	8351	2941	3690	2982	497.578	494.897	524.195	172.619	166.454	163.236	4.12212e-06	3.0194
Catsper2	protein_coding	chr2:121393024-121415600	30	30	26	7	17	11	1.26363	1.23137	1.08935	0.27424	0.511865	0.401921	0.00078372	3.01706
4933427G17Rik	protein_coding	chr7:120982441-121014787	9	10	10	2	1	8	0.537986	0.582499	0.594597	0.111197	0.0427303	0.414828	0.0298058	3.0155
Gcnt4	protein_coding	chr13:96924352-96950914	540	504	606	191	259	207	12.6621	11.5162	14.1345	4.16561	4.3413	4.21049	0.00035789	3.01263
ENSMUSG00000100975.2	lincRNA	chr12:104925501-104926689	126	114	111	47	53	39	18.2562	16.0958	15.9977	6.3339	5.48939	4.90179	0.000187703	3.01043
Gm34773	lncRNA	chr17:43787541-43800383	3	3	4	2	2	0	0.511202	0.498149	0.677994	0.316982	0.243618	0	0.0284297	3.00989
Gm31629	lncRNA	chr1:133977282-134006449	14	21	17	4	9	8	0.711041	1.03933	0.858836	0.188955	0.326751	0.352457	0.00572527	3.00543
Large	protein_coding	chr8:72814598-73353577	3478	3449	3466	1370	1463	1274	123.745	119.58	122.665	45.3368	37.2091	39.3203	7.611e-06	3.00321
Ttll11	protein_coding	chr2:35751226-35979624	44	33	34	11	26	9	2.37546	1.73611	1.82587	0.552359	1.00341	0.42149	0.00773949	3.00287
Esrp2	protein_coding	chr8:106130634-106137006	155	140	130	59	72	39	8.13609	7.16108	6.78769	2.88051	2.70162	1.77582	0.000744529	3.0015
Plcg2	protein_coding	chr8:117498275-117635142	188	214	192	65	106	69	7.50758	8.32765	7.62672	2.41429	3.02591	2.39024	9.3681e-05	2.99626
Atp2b4	protein_coding	chr1:133702674-133801038	931	907	835	374	372	312	18.1291	17.2108	16.1736	6.77378	5.17818	5.27024	0.000117388	2.99111
Hmgcs1	protein_coding	chr13:119690351-119708260	1668	1290	1604	546	681	596	78.1705	58.9119	74.7732	23.7998	22.814	24.2294	0.00138853	2.99049
Arhgap1	protein_coding	chr2:91649875-91672325	3531	3543	3499	1266	1597	1363	163.303	159.674	160.966	54.4581	52.7969	54.6816	9.90912e-08	2.98847
Arhgef37	protein_coding	chr18:61491657-61537044	21	14	16	3	4	13	0.538039	0.349534	0.407764	0.0714906	0.0732592	0.288927	0.0345275	2.98688
Plcb2	protein_coding	chr2:118705003-118728662	41	21	24	8	15	12	0.853672	0.426082	0.497064	0.154928	0.223257	0.216739	0.0424577	2.98663
Syne3	protein_coding	chr12:104929933-105010098	626	719	632	273	280	232	18.0101	20.1575	18.0864	7.30527	5.75846	5.78999	0.000137244	2.98371
Gm37416	protein_coding	chr2:16021779-16024507	42	28	47	18	14	14	2.98373	1.93836	3.32126	1.18937	0.710962	0.862756	0.0141917	2.98339
Pth1r	protein_coding	chr9:110722085-110747145	359	350	346	119	197	115	19.4181	18.4479	18.6159	5.98677	7.61705	5.39585	6.782e-05	2.97278
Arhgef7	protein_coding	chr8:11728105-11835219	2502	2392	2597	907	1129	976	50.6144	47.1536	52.2581	17.0658	16.3263	17.1272	2.65191e-05	2.96968
Fat3	protein_coding	chr9:15910189-16502879	61	36	63	20	16	27	0.400823	0.230511	0.411773	0.122232	0.0751537	0.153899	0.0215525	2.9694
Susd5	protein_coding	chr9:114057354-114098733	27	33	17	17	9	4	1.20068	1.43002	0.75198	0.703145	0.286097	0.154302	0.044865	2.95807
4930412F12Rik	misc_RNA	chr8:57650894-57652593	17	8	12	3	5	7	1.72275	0.790006	1.20962	0.282766	0.362202	0.615348	0.046298	2.95353
Actb	protein_coding	chr5:142903115-142906754	108224	104371	101293	38319	49700	39258	9710.57	9125.73	9040.56	3197.93	3187.76	3055.62	9.00238e-06	2.95265
Chn1	protein_coding	chr2:73610660-73775367	420	428	441	162	186	172	13.3967	13.3033	13.9921	4.80614	4.241	4.75911	5.81257e-06	2.94736
Samd10	protein_coding	chr2:181595215-181599491	44	35	25	12	9	20	3.05773	2.37018	1.72815	0.77564	0.447091	1.20566	0.0235207	2.94683
Trim47	protein_coding	chr11:116105750-116110235	2303	2452	2250	948	988	882	180.751	187.532	175.657	69.2037	55.431	60.049	2.29155e-05	2.94525
Hacd4	protein_coding	chr4:88407687-88438936	1139	1053	1212	403	487	486	39.0723	35.1998	41.3564	12.8583	11.9421	14.4621	0.000195563	2.94501
Ssfa2	protein_coding	chr2:79635260-79672966	1986	1916	1952	683	948	755	61.8583	58.1542	60.4774	19.7867	21.1074	20.3993	4.13186e-06	2.94469
ENSMUSG00000108732.1	TEC	chr7:34389732-34393612	55	65	65	16	37	24	2.44141	2.81163	2.87003	0.66059	1.17405	0.924144	0.000865032	2.94444
ENSMUSG00000097728.1	lincRNA	chr4:155769969-155776161	33	35	24	11	18	9	1.90774	1.9717	1.3801	0.591469	0.743851	0.451334	0.00489509	2.9438
Gm35235	lncRNA	chr10:120979366-120980149	12	9	7	3	2	6	4.80768	3.51369	2.78963	1.11791	0.572785	2.08523	0.0295141	2.94258
Hist2h3c1	protein_coding	chr3:96246685-96247348	41	34	36	15	17	13	10.6375	8.59607	9.29076	3.61975	3.1529	2.92582	0.00058155	2.94111
ENSMUSG00000114068.1	TEC	chr13:13514738-13515817	4	7	5	1	5	1	0.638056	1.08809	0.793347	0.148365	0.570133	0.138372	0.0461275	2.94034
ENSMUSG00000111412.1	antisense	chr9:67424503-67427491	3	2	2	1	2	0	0.215254	0.139839	0.142743	0.0667365	0.102581	0	0.0480119	2.94025
4930523C07Rik	protein_coding	chr1:160044368-160078587	406	379	404	152	144	180	9.93942	9.04151	9.83809	3.46108	2.52003	3.82258	0.000191515	2.93961
Gm12715	pseudogene	chr4:103563325-103565229	571	520	494	256	191	184	51.6373	45.8245	44.4374	21.5328	12.3472	14.4343	0.000923618	2.93701
Fbln7	protein_coding	chr2:128863855-128897034	361	431	394	133	199	154	20.8276	24.2313	22.6112	7.13702	8.20717	7.70731	0.000133913	2.93561
N6amt1	protein_coding	chr16:87354185-87368649	287	307	327	107	146	123	27.6063	28.7761	31.2874	9.5729	10.0389	10.2632	6.34875e-05	2.93456
Insig1	protein_coding	chr5:28071412-28078662	901	750	808	292	385	327	58.6178	47.548	52.289	17.6693	17.9049	18.4545	0.000412841	2.93279
Ptchd1	protein_coding	chrX:155569736-155624178	18	14	14	11	5	2	0.46269	0.350681	0.357965	0.262993	0.0918746	0.0445962	0.0271541	2.93228
Fscn1	protein_coding	chr5:142960355-142973189	10245	10892	9761	3989	4816	3776	661.777	685.605	627.174	239.66	222.379	211.583	2.1069e-05	2.93125
Magi1	protein_coding	chr6:93675453-94283920	747	692	780	299	312	287	9.64472	8.70646	10.0175	3.59065	2.87959	3.2144	0.000145649	2.92924
ENSMUSG00000093577.1	antisense	chr3:96239393-96241819	109	109	125	41	53	46	7.73712	7.53956	8.82586	2.70688	2.68928	2.83243	0.000193298	2.92912
Gcnt1	protein_coding	chr19:17326141-17372844	169	167	203	51	94	78	5.78127	5.56698	6.9076	1.62271	2.29865	2.31463	0.00107498	2.92751
D130037M23Rik	protein_coding	chr13:103920266-103923396	235	265	119	102	54	87	12.9303	14.2086	6.513	5.22002	2.12393	4.15248	0.0441978	2.92716
Fry	protein_coding	chr5:150118636-150497753	99	94	95	31	39	47	1.45349	1.34484	1.38738	0.423322	0.409306	0.598582	0.000180269	2.92459
Col6a1	protein_coding	chr10:76708792-76726044	8838	8746	10257	3743	4157	3428	382.939	369.277	442.07	150.844	128.755	128.845	0.000369614	2.92399
Tinagl1	protein_coding	chr4:130165600-130175122	2374	2374	2046	840	1080	860	188.037	183.236	161.199	61.8836	61.1497	59.0896	0.00014842	2.9237
Bvht	lncRNA	chr18:61639653-61647485	200	242	250	60	127	101	57.3295	67.5974	71.2824	15.9968	26.0231	25.1142	0.00121728	2.92265
Gucy2e	protein_coding	chr11:69218117-69237358	14	24	13	6	9	6	0.27828	0.46487	0.257035	0.110927	0.12788	0.103456	0.0298786	2.92227
Vav1	protein_coding	chr17:57279079-57329236	118	75	90	34	37	44	4.81375	2.98146	3.65206	1.29007	1.07897	1.55705	0.0105366	2.91569
Maml2	protein_coding	chr9:13297958-13709533	1166	1001	1122	416	503	428	29.7942	24.925	28.5181	9.88689	9.18775	9.48696	0.000244409	2.91431
Scube3	protein_coding	chr17:28142100-28174848	69	76	85	25	38	32	1.37533	1.47618	1.68528	0.46348	0.541438	0.553296	0.000483849	2.91153
ENSMUSG00000097889.1	lincRNA	chr10:80681838-80687176	1060	1013	1102	380	506	421	45.9631	42.8036	47.5313	15.3257	15.6842	15.8356	2.86152e-05	2.90952
S100a11	protein_coding	chr3:93520496-93526288	7560	8078	8270	2684	4000	3200	2584.13	2690.68	2811.85	853.311	977.371	948.836	1.99029e-05	2.90937
Enho	protein_coding	chr4:41638144-41640302	32	41	46	21	16	11	4.42085	5.51959	6.32133	2.69841	1.5801	1.31825	0.00689742	2.90557
3110070M22Rik	lncRNA	chr13:119487257-119488384	24	26	27	8	19	6	3.66543	3.86949	4.10177	1.13641	2.07431	0.794903	0.00321348	2.90508
Pusl1	protein_coding	chr4:155888857-155891851	370	372	296	153	149	121	36.4239	35.6857	28.9848	14.0091	10.4852	10.3328	0.00113779	2.90275
Gm36569	lncRNA	chr3:79859293-79886806	1177	1213	1043	479	478	442	210.122	211.019	185.214	79.536	61.0001	68.449	0.000189599	2.90143
Csrp2	protein_coding	chr10:110920176-110939514	1357	1481	1255	512	655	520	262.967	279.668	241.913	92.2834	90.7339	87.4125	9.97205e-05	2.90111
Ttc9	protein_coding	chr12:81631249-81667557	1055	985	846	365	485	345	38.039	34.6082	30.3418	12.2406	12.5004	10.7906	0.000602132	2.89852
Gm35906	lncRNA	chr6:65122407-65127323	6	6	4	0	4	3	0.381985	0.372231	0.253308	0	0.182038	0.165678	0.0368514	2.89755
LOC108167576	protein_coding	chr8:128684732-128686598	279	464	295	139	171	118	28.9198	46.868	30.4164	13.4011	12.6705	10.6102	0.0162824	2.89528
Gm35760	lncRNA	chr4:100376583-100393210	18	13	12	3	7	8	0.356063	0.25059	0.236118	0.0551961	0.0989828	0.137276	0.0146319	2.89161
LOC108168826	lncRNA	chr2:181185047-181187191	9	9	9	5	4	2	0.783069	0.763074	0.778923	0.404632	0.248785	0.150951	0.00239142	2.89055
Pou3f4	protein_coding	chrX:110814379-110819108	36	34	36	11	11	21	1.31118	1.20672	1.30424	0.372638	0.286392	0.663483	0.00218683	2.89006
Kcnk13	protein_coding	chr12:99964499-100062682	28	25	24	14	9	8	1.55003	1.34862	1.32157	0.720848	0.35615	0.384169	0.00260308	2.88825
Pcyt1a	protein_coding	chr16:32430921-32475065	2060	1945	2037	739	934	826	68.3263	62.8647	67.2057	22.7981	22.145	23.7657	1.52525e-05	2.88751
Mid2	protein_coding	chrX:140664304-140767715	718	734	755	265	360	292	17.7161	17.6484	18.5304	6.08165	6.34969	6.24993	2.35112e-06	2.88497
Syt14	protein_coding	chr1:192885674-193035862	18	18	16	7	11	4	0.188496	0.183683	0.166665	0.0681806	0.0823437	0.0363362	0.00149029	2.88367
Chst12	protein_coding	chr5:140505580-140525238	2367	2470	2070	943	1019	884	220.897	224.623	192.157	81.8531	67.9786	71.5636	0.000232929	2.88026
Sema3d	protein_coding	chr5:12383166-12588943	434	375	381	166	176	149	11.4656	9.65397	10.0122	4.07896	3.32375	3.41463	0.000357935	2.87795
ENSMUSG00000084948.1	antisense	chr18:69943320-69969609	6	7	8	3	5	1	0.956198	1.08708	1.26818	0.444683	0.569606	0.138244	0.0101218	2.8732
Mob3a	protein_coding	chr10:80685253-80701820	1638	1563	1656	637	770	617	106.606	99.1275	107.207	38.5603	35.8234	34.834	1.78325e-05	2.86529
Mical1	protein_coding	chr10:41475860-41487030	1863	1869	1635	750	857	628	75.7669	74.07	66.1422	28.3701	24.9146	22.1552	0.000173893	2.86293
Gm15738	lncRNA	chr16:13392408-13406588	4	7	5	1	4	2	0.284048	0.484391	0.35318	0.0660487	0.203048	0.1232	0.0265913	2.85911
Cacna1c	protein_coding	chr6:118587240-119197496	1110	1079	952	402	424	474	11.904	11.276	10.1555	4.00985	3.25044	4.40957	0.000299053	2.85655
Chst3	protein_coding	chr10:60181527-60221094	39	43	23	14	12	17	0.607645	0.65286	0.356457	0.202883	0.133652	0.229765	0.022202	2.85531
Gm20717	lncRNA	chr15:64097452-64101622	24	13	18	8	3	11	1.28086	0.676081	0.955556	0.397111	0.11445	0.50925	0.0401504	2.85312
Sox6	protein_coding	chr7:115470872-116041138	54	35	31	19	13	17	0.398495	0.251688	0.227554	0.130411	0.0685771	0.108825	0.0280922	2.85153
Msmo1	protein_coding	chr8:64718145-64733578	978	804	1024	348	433	394	92.3712	73.9981	96.2038	30.571	29.2343	32.2807	0.00119132	2.85139
Nr1i3	protein_coding	chr1:171213932-171218845	30	38	35	11	9	22	2.19926	2.71459	2.55221	0.750033	0.471633	1.39903	0.00677766	2.84889
Rasa4	protein_coding	chr5:136083916-136111860	1607	1676	1677	658	828	599	85.7109	87.1085	88.9708	32.6421	31.5688	27.7138	5.68385e-06	2.84788
ENSMUSG00000097491.1	antisense	chr8:45017216-45022385	557	571	526	250	219	214	24.0977	24.0727	22.6361	10.0599	6.77287	8.03127	0.00013973	2.84775
2010320M18Rik	lncRNA	chr8:70776862-70777606	94	65	86	29	44	31	21.7367	14.6469	19.7815	6.23731	7.27321	6.21838	0.00477732	2.84685
Ssc4d	protein_coding	chr5:135960220-135974535	25	31	22	8	19	7	1.51491	1.83052	1.32606	0.450888	0.823013	0.367954	0.00763338	2.84525
Folr2	protein_coding	chr7:101839988-101857190	107	80	122	31	46	53	11.7485	8.55965	13.3246	3.16588	3.61048	5.04806	0.00860394	2.84435
Cyth4	protein_coding	chr15:78597047-78622019	250	205	226	91	101	93	14.8257	11.8467	13.3315	5.01939	4.28159	4.78419	0.00062246	2.84015
C1ql3	protein_coding	chr2:13001887-13010864	256	233	212	78	117	102	13.9432	12.3665	11.4856	3.9514	4.5553	4.81918	0.000434662	2.83623
B3gnt9	protein_coding	chr8:105252638-105255319	716	799	710	271	380	291	45.9914	50.0123	45.3645	16.1907	17.4484	16.2146	3.58293e-05	2.83566
Afap1l2	protein_coding	chr19:56912354-57008591	541	528	530	185	244	244	21.8987	20.8267	21.3398	6.96507	7.06022	8.56762	2.1638e-05	2.83564
Erg	protein_coding	chr16:95359169-95586593	41	48	52	12	29	20	1.92986	2.20165	2.43467	0.525358	0.975769	0.816621	0.00197048	2.833
Ngef	protein_coding	chr1:87476829-87573870	33	17	24	9	10	12	1.67999	0.84335	1.21534	0.426155	0.363915	0.529935	0.0308873	2.83232
Kif1c	protein_coding	chr11:70700323-70731970	9144	9258	8574	3635	4197	3511	224.655	221.648	209.536	83.065	73.7101	74.8274	1.34171e-05	2.83175
Hspb6	protein_coding	chr7:30552556-30555439	627	664	669	271	290	262	68.932	71.1358	73.1601	27.7112	22.7908	24.9864	1.65072e-05	2.82464
Cd59a	protein_coding	chr2:104095801-104115410	372	298	307	131	155	127	29.891	23.3335	24.5375	9.79043	8.90301	8.85219	0.0011982	2.82303
Mrps6	protein_coding	chr16:92058336-92112227	628	657	688	264	317	254	138.704	141.403	151.151	54.2331	50.0489	48.6644	2.33576e-05	2.81967
Aven	protein_coding	chr2:112492885-112631253	148	174	151	61	69	69	13.62	15.6039	13.8225	5.22131	4.53914	5.50827	0.000181119	2.81926
Chsy3	protein_coding	chr18:59175340-59411336	392	444	341	151	192	156	17.3961	19.2007	15.0527	6.23271	6.09082	6.00539	0.000763936	2.81793
Pkd1	protein_coding	chr17:24549950-24596514	11658	11622	10789	4784	5369	4250	140.24	136.237	129.1	53.527	46.1689	44.3494	3.49363e-05	2.81562
Kbtbd8	protein_coding	chr6:95117880-95129793	11	15	10	2	9	5	0.40047	0.532152	0.362136	0.0677237	0.234222	0.157905	0.0168304	2.8156
Fhod1	protein_coding	chr8:105329160-105347970	826	800	766	314	381	319	36.0434	34.0175	33.2482	12.7441	11.8844	12.075	1.42244e-05	2.8147
Acot6	protein_coding	chr12:84100654-84109783	65	71	85	27	36	31	6.14593	6.54183	7.99443	2.37449	2.43323	2.54264	0.00140343	2.81376
Gm14010	lncRNA	chr2:128421927-128425100	12	11	11	2	2	10	0.784257	0.700546	0.715096	0.121574	0.0934361	0.566926	0.0384289	2.8134
Ocel1	protein_coding	chr8:71371298-71373689	64	69	59	25	34	23	6.56677	6.89902	6.02169	2.38586	2.49378	2.04715	0.000131925	2.81335
Wdr81	protein_coding	chr11:75440943-75454717	1845	2029	1800	775	893	733	36.4964	39.1114	35.4178	14.259	12.6274	12.5779	4.13802e-05	2.81332
Ms4a7	protein_coding	chr19:11321039-11336146	47	55	48	22	27	15	4.71849	5.38065	4.79337	2.05429	1.93765	1.30631	0.000515447	2.81084
Pdlim2	protein_coding	chr14:70164218-70177736	1282	1414	1455	527	703	541	113.844	122.359	128.522	43.5275	44.6255	41.6742	5.55799e-05	2.80931
Paqr6	protein_coding	chr3:88364071-88368541	7	11	13	4	4	5	0.451151	0.690848	0.833415	0.239782	0.184285	0.279539	0.0210266	2.80755
Gm32643	lncRNA	chr8:128453055-128491976	14	15	17	4	9	7	0.328545	0.343024	0.396836	0.0873092	0.150979	0.1425	0.00135216	2.80577
Gm15706	lncRNA	chr6:145250552-145251856	14	15	16	9	2	7	2.72218	2.84215	3.09459	1.62766	0.277988	1.18069	0.0107379	2.80556
Gm16907	lncRNA	chr13:63289154-63297147	147	130	116	50	60	57	9.16224	7.89577	7.19179	2.89859	2.67327	3.08183	0.000906302	2.80225
Tnks1bp1	protein_coding	chr2:85048013-85073048	8237	8815	7813	3473	3867	3210	177.179	184.771	167.169	69.4835	59.4601	59.8961	4.78532e-05	2.80195
Aif1	protein_coding	chr17:35170991-35176080	8	16	9	4	5	5	1.33936	2.61032	1.4988	0.622874	0.59839	0.72615	0.0438727	2.7978
Slc9a3r2	protein_coding	chr17:24639281-24650339	447	502	445	193	215	186	32.6577	35.7395	32.3395	13.115	11.2286	11.788	6.05043e-05	2.78805
Tmem64	protein_coding	chr4:15265820-15286753	1444	1342	1294	504	666	581	53.1436	48.1286	47.371	17.2523	17.5213	18.5485	6.79667e-05	2.78765
Gm2065	lncRNA	chr9:83098137-83125313	29	26	30	12	6	17	0.789628	0.689866	0.812532	0.303906	0.116784	0.401535	0.00589968	2.78759
Abracl	protein_coding	chr10:18011260-18023252	1020	1022	1211	400	546	454	199.23	194.523	235.284	72.6686	76.2349	76.9235	0.00048541	2.78548
Fbxo9	protein_coding	chr9:78081499-78109065	510	485	450	182	222	215	39.5945	36.6922	34.7514	13.1422	12.3204	14.4795	0.000104441	2.77997
Lhfp	protein_coding	chr3:53041547-53261679	6276	6725	6342	2489	3156	2667	517.567	540.434	520.241	190.916	186.049	190.79	1.38849e-06	2.77979
Ephb3	protein_coding	chr16:21204795-21223309	1120	1139	926	451	465	441	46.4935	46.0749	38.2367	17.4134	13.7986	15.8804	0.000637042	2.77762
Tlr6	protein_coding	chr5:64952030-64971140	39	48	42	18	19	18	1.55203	1.86141	1.66257	0.666255	0.5405	0.621379	0.000377363	2.7766
ENSMUSG00000085766.1	processed_transcript	chr2:27882925-27887052	96	103	82	43	38	38	4.84145	5.06184	4.11351	2.017	1.36992	1.66241	0.000946324	2.77597
Lrrc27	protein_coding	chr7:139212864-139242979	389	396	363	156	190	148	20.3941	20.231	18.9302	7.60698	7.12059	6.73079	1.77232e-05	2.77539
Gm9949	misc_RNA	chr18:62180032-62184406	20	24	35	14	14	6	3.2597	3.81176	5.67427	2.12231	1.63111	0.848297	0.0295545	2.76978
Postn	protein_coding	chr3:54359272-54391041	9141	8935	8755	3530	4422	3625	463.03	441.039	441.13	166.312	160.119	159.284	3.026e-06	2.76952
Endod1	protein_coding	chr9:14353990-14381242	687	679	573	272	317	246	25.9148	24.959	21.5001	9.54318	8.54788	8.04963	0.000399068	2.76863
Sncg	protein_coding	chr14:34370274-34374669	93	114	147	53	68	33	21.8874	26.1447	34.4131	11.6017	11.44	6.73713	0.0118766	2.76858
Gm31769	lncRNA	chr4:124465276-124468075	4	2	3	1	2	1	0.256553	0.125001	0.191396	0.0596553	0.0916967	0.0556373	0.0370632	2.76801
Ecm2	protein_coding	chr13:49504810-49532789	64	46	68	21	34	23	3.06607	2.14747	3.24046	0.935739	1.16437	0.955829	0.00656887	2.76642
Traf5	protein_coding	chr1:191997203-192092599	252	264	267	106	117	113	20.2205	20.6424	21.3106	7.91096	6.71095	7.86535	1.26046e-05	2.76483
Armc6	protein_coding	chr8:70220172-70234422	252	247	234	94	142	85	15.3242	14.6366	14.1542	5.31663	6.17265	4.48378	9.39915e-05	2.76183
Fam124a	protein_coding	chr14:62555737-62608486	487	549	463	181	274	199	21.0799	23.1568	19.9349	7.28703	8.47808	7.47209	0.000175736	2.76159
Thbs2	protein_coding	chr17:14665500-14694262	24351	24919	24232	9541	11901	10332	708.387	706.401	701.193	258.155	247.483	260.728	6.48215e-08	2.76106
Dusp5	protein_coding	chr19:53529318-53541322	251	255	225	113	131	73	37.4381	37.0636	33.3824	15.6766	13.9675	9.44523	0.000535723	2.75994
Rps2-ps6	pseudogene	chr14:76236647-76237574	13	9	9	5	3	5	2.41334	1.62811	1.66193	0.863331	0.39811	0.805182	0.0147626	2.75975
Rin2	protein_coding	chr2:145771727-145887616	937	953	970	369	473	397	30.2231	29.9543	31.1219	11.0703	10.9061	11.1081	6.96848e-07	2.75958
Oxct1	protein_coding	chr15:4026428-4155344	3358	3263	3397	1293	1623	1425	166.14	157.318	167.18	59.5011	57.401	61.1587	6.08537e-06	2.75545
Cthrc1	protein_coding	chr15:39076851-39087121	585	651	556	232	313	235	80.8187	87.6402	76.4056	29.811	30.9106	28.1626	0.000102279	2.75487
Ufm1	protein_coding	chr3:53853376-53863807	1473	1344	1540	548	767	586	52.1391	46.3582	54.2221	18.0416	19.4072	17.9932	0.000172966	2.75458
Tchh	protein_coding	chr3:93442330-93449077	86	123	87	36	41	50	2.54433	3.54607	2.56029	0.990629	0.867096	1.2832	0.00653746	2.75419
Neurl1b	protein_coding	chr17:26414965-26446349	157	145	127	50	55	79	4.36597	3.92931	3.51301	1.29325	1.09333	1.90571	0.00195035	2.75104
Pik3c2b	protein_coding	chr1:133045672-133108691	80	54	58	24	34	26	1.58596	1.04319	1.14373	0.442534	0.481825	0.447121	0.00872272	2.75096
Ptgdr2	protein_coding	chr19:10927861-10942511	27	28	28	10	13	13	1.26466	1.27801	1.30456	0.435656	0.435273	0.528206	1.59936e-05	2.74972
ENSMUSG00000097142.1	lincRNA	chr14:102978220-102982528	697	692	740	297	339	286	31.5574	30.531	33.3268	12.5071	10.9717	11.2327	2.8052e-05	2.7488
Map3k9	protein_coding	chr12:81714950-81781425	34	24	23	11	12	12	0.466573	0.320936	0.313952	0.1404	0.117714	0.142847	0.00977879	2.74705
Mpzl3	protein_coding	chr9:45055181-45075042	49	27	39	17	19	14	8.15602	4.37938	6.45716	2.63187	2.2607	2.02143	0.0219838	2.74697
Myl12a	protein_coding	chr17:70993793-71002533	15609	16812	16178	5993	8423	6836	1413.8	1483.88	1457.58	504.881	545.364	537.11	2.68099e-06	2.74372
Borcs7	protein_coding	chr19:46689906-46703382	150	148	151	51	72	73	11.8756	11.418	11.8915	3.75549	4.07477	5.01344	5.30892e-05	2.73948
Nacad	protein_coding	chr11:6597814-6606054	1023	968	835	460	427	332	35.9521	33.1506	29.1897	15.0363	10.7272	10.1213	0.00113686	2.73912
F930015N05Rik	lncRNA	chr11:64433135-64436674	31	30	32	17	14	9	1.50862	1.42268	1.54904	0.769486	0.487029	0.379937	0.00147966	2.73784
D830050J10Rik	misc_RNA	chr6:115676000-115678367	212	201	164	81	93	77	15.4233	14.2496	11.868	5.48099	4.8365	4.85938	0.00118485	2.73712
Arpc5	protein_coding	chr1:152766542-152775580	4183	4025	4221	1626	2030	1766	379.877	356.195	381.298	137.344	131.783	139.122	9.65223e-06	2.73699
Arpc4	protein_coding	chr6:113378113-113390447	3543	3626	3503	1393	1825	1452	268.767	268.04	264.326	98.2855	98.9636	95.5479	6.46592e-08	2.73614
Hist1h2bc	protein_coding	chr13:23684199-23692480	1114	1258	1122	443	605	484	247.951	272.853	248.41	91.7103	96.2597	93.4493	4.06414e-05	2.73334
Neo1	protein_coding	chr9:58874679-59037162	6430	6303	5879	2490	2968	2655	136.622	130.504	124.253	49.2086	45.0796	48.9353	2.66655e-05	2.73264
Mkln1os	lncRNA	chr6:31366885-31398773	6	5	5	3	3	1	1.07225	0.870727	0.888812	0.498654	0.383243	0.155023	0.00750851	2.73096
Arfgef2	protein_coding	chr2:166805463-166898052	2922	2769	2822	1197	1365	1152	56.5922	52.2596	54.3661	21.5627	18.898	19.3543	2.10965e-05	2.72871
Kctd12	protein_coding	chr14:102976581-102982637	1196	1189	1244	518	577	488	34.017	32.9544	35.1949	13.7034	11.7314	12.0402	1.72843e-05	2.72626
Slc24a3	protein_coding	chr2:145167712-145642166	366	333	361	166	141	150	15.2485	13.5194	14.9606	6.43262	4.19927	5.4211	0.000387788	2.72401
Gm13257	lncRNA	chr4:133480575-133485183	9	8	8	1	9	2	0.458043	0.396753	0.404994	0.0473366	0.327426	0.0882964	0.0411542	2.72058
Synm	protein_coding	chr7:67730161-67759742	208	241	180	80	132	69	4.55546	5.14342	3.92135	1.62964	2.06657	1.31089	0.0022974	2.72018
Ppp1r12b	protein_coding	chr1:134754658-134955965	3473	3574	3387	1451	1684	1435	41.4716	41.588	40.2306	16.1156	14.3746	14.8644	2.74337e-06	2.71836
Asic3	protein_coding	chr5:24410289-24417834	204	221	216	80	112	91	6.27349	6.62275	6.60735	2.28824	2.4621	2.42756	5.22775e-06	2.71717
Clasp2	protein_coding	chr9:113741059-113919697	2370	2140	2301	970	1069	941	38.7117	34.0623	37.3856	14.7366	12.4818	13.3331	0.000110545	2.71653
ENSMUSG00000097141.2	TEC	chr18:82692284-82694176	145	116	132	54	55	62	13.1959	10.2872	11.9492	4.57087	3.57801	4.89455	0.00131375	2.71649
Mest	protein_coding	chr6:30733506-30748466	59	73	69	38	36	14	3.50975	4.23169	4.08289	2.10252	1.53085	0.722439	0.00550905	2.71461
Btk	protein_coding	chrX:134542334-134583624	27	20	34	12	10	13	1.59241	1.14944	1.99464	0.658271	0.421598	0.665095	0.0178115	2.71438
LOC108167670	pseudogene	chr1:93421685-93422537	14	14	14	5	4	9	2.82749	2.75529	2.81252	0.939239	0.577485	1.57676	0.00380506	2.71387
Col6a2	protein_coding	chr10:76595756-76623625	6645	6727	7129	2946	3388	2681	198.848	196.162	212.202	81.9958	72.4731	69.5941	3.31529e-05	2.71
Cav1	protein_coding	chr6:17306335-17341328	3835	3882	3925	1396	2079	1692	226.647	223.566	230.737	76.7365	87.8306	86.7428	3.99423e-06	2.7096
Pdlim1	protein_coding	chr19:40222239-40271616	3728	4066	3745	1512	2020	1572	426.739	453.545	426.415	160.98	165.289	156.095	8.06391e-06	2.70895
Cfap99	protein_coding	chr5:34286953-34328861	17	13	12	4	9	6	0.346712	0.258363	0.243442	0.0758775	0.131211	0.10615	0.00770968	2.70885
ENSMUSG00000110409.1	bidirectional_promoter_lncRNA	chr8:44934712-44935159	20	17	10	8	10	3	7.69085	6.3703	3.82507	2.86133	2.74886	1.00073	0.0429809	2.70556
Tnik	protein_coding	chr3:28263214-28672457	174	157	190	80	73	74	1.49797	1.3171	1.62705	0.640585	0.449246	0.55263	0.000902932	2.70456
Cxcr4	protein_coding	chr1:128588199-128592311	22	31	23	11	10	12	2.04536	2.80851	2.12701	0.951202	0.664591	0.967782	0.00495308	2.70202
Dkk3	protein_coding	chr7:112116019-112159121	3426	3570	3857	1517	1791	1481	167.675	170.261	187.769	69.0555	62.6589	62.8759	7.72231e-05	2.7016
Osbpl5	protein_coding	chr7:143688762-143756980	2205	2299	2002	884	1137	863	79.3372	80.6072	71.6518	29.5838	29.244	26.9357	7.61352e-05	2.70041
Paqr4	protein_coding	chr17:23736186-23740899	294	360	318	107	177	150	19.4206	23.1731	20.8947	6.57403	8.35787	8.59519	0.000458923	2.69852
Arf2	protein_coding	chr11:103966725-103985350	1436	1342	1497	524	764	617	89.1164	81.1563	92.4101	30.2459	33.8925	33.2153	9.7554e-05	2.69823
Sparcl1	protein_coding	chr5:104079108-104114088	39	35	33	16	22	10	1.96742	1.72055	1.65592	0.750731	0.793345	0.437604	0.0015861	2.69664
Arhgap25	protein_coding	chr6:87458544-87533261	34	26	36	8	16	19	0.97949	0.729896	1.03162	0.21436	0.329495	0.474815	0.00869273	2.69077
Fzd1	protein_coding	chr5:4753839-4758216	3717	3817	3523	1601	1881	1421	146.265	146.364	137.897	58.5964	52.9106	48.5054	2.41009e-05	2.69058
Gm30873	lncRNA	chr7:84334497-84347871	118	101	123	36	53	63	2.86155	2.38675	2.96701	0.811998	0.918762	1.32529	0.00192346	2.68822
Gm7665	pseudogene	chr18:16274508-16275009	22	38	25	11	16	11	7.5499	12.7078	8.53401	3.51111	3.92506	3.27462	0.0193544	2.6881
Zfp503	protein_coding	chr14:21983962-21989601	2547	2631	2449	1060	1300	1030	104.15	104.838	99.6126	40.3153	37.9998	36.5357	5.2067e-06	2.68697
Dnm3	protein_coding	chr1:161982450-162478328	26	31	33	13	21	7	0.534888	0.621467	0.675302	0.248752	0.308828	0.124921	0.00484867	2.68374
Clcn4	protein_coding	chr7:7282309-7300870	1553	1536	1577	640	825	620	43.5313	41.9554	43.97	16.6856	16.5307	15.0755	4.51994e-06	2.68072
Cd48	protein_coding	chr1:171681420-171705257	19	29	35	13	15	9	2.14076	3.18405	3.92263	1.36236	1.20813	0.879644	0.0226679	2.68032
Alcam	protein_coding	chr16:52248996-52453064	451	450	442	162	261	183	15.4588	15.0307	15.0701	5.16473	6.39511	5.44127	1.7929e-05	2.6798
Irs1	protein_coding	chr1:82233105-82291439	1024	1058	973	409	453	489	19.2524	19.3837	18.1967	7.15222	6.08822	7.97523	5.71414e-05	2.67881
Crim1	protein_coding	chr17:78200232-78376592	10018	9482	9489	3924	4852	4147	287.116	264.815	270.515	104.601	99.404	103.1	1.5144e-05	2.67805
6430548M08Rik	protein_coding	chr8:120114152-120165307	259	212	222	123	87	92	7.01009	5.59148	5.97684	3.09644	1.68326	2.16004	0.00282143	2.67711
ENSMUSG00000097994.1	antisense	chr6:113714971-113716121	42	45	42	23	15	18	6.28632	6.56336	6.25304	3.2019	1.60489	2.33706	0.00107596	2.67401
Rassf6	protein_coding	chr5:90603076-90640739	60	53	75	21	35	29	3.21209	2.7649	3.99385	1.04566	1.33941	1.34674	0.00505041	2.67186
A430105I19Rik	protein_coding	chr2:118754145-118762953	1606	1472	1497	646	726	664	49.3796	44.1038	45.7845	18.4743	15.9568	17.71	7.29989e-05	2.67098
ENSMUSG00000108737.1	TEC	chr7:34250252-34251355	22	16	22	5	15	8	3.43302	2.43299	3.41484	0.725699	1.67322	1.08291	0.0109177	2.66551
Eva1b	protein_coding	chr4:126145704-126149875	892	982	899	381	505	362	57.2966	61.467	57.4405	22.7626	23.188	20.1707	2.48179e-05	2.66486
Rock1	protein_coding	chr18:10064401-10181792	4271	3826	4115	1686	2060	1726	118.085	103.08	113.169	43.3566	40.7136	41.3957	0.000100691	2.66475
Rnase10	protein_coding	chr14:51007751-51010761	18	22	13	10	6	7	1.85908	2.21419	1.33556	0.960637	0.442981	0.627153	0.0191976	2.66344
Cd300lb	protein_coding	chr11:114922779-114934386	67	52	77	30	23	33	4.00501	3.02899	4.5784	1.66795	0.982797	1.71116	0.00905158	2.66223
ENSMUSG00000086536.1	antisense	chr11:59775286-59780321	13	20	13	6	10	5	4.47915	6.71505	4.45544	1.92281	2.46297	1.49442	0.0152133	2.66141
Acyp2	protein_coding	chr11:30505992-30649782	146	117	161	54	79	59	22.7416	17.7591	24.9452	7.82337	8.79634	7.97203	0.00316416	2.66129
Sorbs3	protein_coding	chr14:70180468-70213931	1146	1191	1185	508	620	456	32.9265	33.3457	33.8668	13.5755	12.7339	11.3651	7.57141e-06	2.658
Tph2	protein_coding	chr10:115078641-115185022	4	4	3	1	2	2	0.262414	0.255714	0.195769	0.0610184	0.0937919	0.113817	0.00477833	2.65758
Tax1bp3	protein_coding	chr11:73177083-73182046	922	928	903	400	440	391	112.094	109.943	109.203	45.232	38.2395	41.2362	6.25105e-06	2.65613
Ephx1	protein_coding	chr1:180989556-181017569	4953	5219	5008	1982	2609	2249	490.672	503.822	493.494	182.625	184.758	193.269	4.62233e-07	2.65403
ENSMUSG00000105135.1	TEC	chr3:34054335-34055429	10	15	15	10	3	4	1.57329	2.29967	2.34744	1.46333	0.337394	0.545906	0.0390116	2.65078
ENSMUSG00000107379.1	antisense	chr6:127122966-127126155	536	596	479	218	283	226	215.243	233.227	191.335	81.4244	81.238	78.7269	0.000399701	2.65051
Ly6c1	protein_coding	chr15:75044018-75048853	635	673	886	291	340	353	64.5777	66.6946	89.6267	27.5255	24.717	31.141	0.00509758	2.64919
Mycl	protein_coding	chr4:122995609-123002490	85	100	76	35	41	41	3.77699	4.33005	3.35919	1.44653	1.30232	1.58037	0.00124165	2.64856
Pde7b	protein_coding	chr10:20397052-20725068	99	113	88	47	41	45	1.41678	1.57584	1.25269	0.625603	0.41943	0.558637	0.00138158	2.64725
Arhgap30	protein_coding	chr1:171388960-171410240	121	91	116	38	52	58	4.64467	3.40391	4.42917	1.35671	1.42686	1.93129	0.00362826	2.64648
Mcur1	protein_coding	chr13:43538406-43560260	511	483	463	191	238	228	17.3943	16.0214	15.677	6.04717	5.79123	6.73241	6.86429e-05	2.64354
Thy1	protein_coding	chr9:44043384-44048579	7463	8538	7848	3406	3976	3374	741.031	826.125	775.133	314.558	282.213	290.615	5.28844e-05	2.63954
Klrg2	protein_coding	chr6:38621414-38637712	33	41	36	11	13	25	1.62663	1.96936	1.76511	0.504314	0.458064	1.06897	0.00727579	2.63919
Ngfr	protein_coding	chr11:95568818-95587698	353	429	412	181	199	158	17.839	21.1261	20.7103	8.5076	7.18879	6.92631	0.000416569	2.63786
Nudt4	protein_coding	chr10:95547007-95564180	4946	4966	4986	2035	2578	2140	262.418	256.752	263.14	100.424	97.7756	98.4925	1.93265e-07	2.63677
Sec16b	protein_coding	chr1:157506733-157568425	288	289	267	130	132	117	7.99343	7.81637	7.37134	3.35596	2.61892	2.81693	7.57887e-05	2.63667
Pde8b	protein_coding	chr13:95024105-95250400	203	212	208	82	93	105	4.72018	4.80358	4.81084	1.77341	1.5458	2.11788	6.1642e-05	2.63645
Flna	protein_coding	chrX:74223461-74249852	87471	84469	83413	38161	42792	34341	1656.85	1559.13	1571.62	672.314	579.415	564.264	2.66776e-05	2.63636
Rasal2	protein_coding	chr1:157135183-157412595	909	855	869	345	458	393	13.0924	12.0002	12.45	4.62176	4.7155	4.91017	1.89014e-05	2.63504
Ptk2b	protein_coding	chr14:66153257-66281068	837	817	778	340	396	363	33.2168	31.5952	30.7119	12.55	11.234	12.4965	2.03677e-05	2.63292
Gm30827	lncRNA	chr3:148996762-149011815	6	7	5	2	2	4	0.0932561	0.106021	0.077302	0.0289127	0.022221	0.0539306	0.0109061	2.63247
Dtwd2	protein_coding	chr18:49696145-49755667	47	44	56	15	30	23	1.45106	1.32375	1.71977	0.430737	0.66209	0.615978	0.00243695	2.63025
Gm40800	lncRNA	chr10:127264304-127265744	6	4	6	2	1	4	1.33202	0.865341	1.32497	0.412975	0.158697	0.770318	0.0365607	2.62471
Gdpd5	protein_coding	chr7:99381415-99460984	226	255	218	103	112	101	9.611	10.5674	9.2217	4.07409	3.40475	3.7259	0.000166416	2.6239
2010110K18Rik	misc_RNA	chr18:34753443-34758694	4	3	4	2	2	1	0.763123	0.557728	0.759083	0.354893	0.272755	0.165495	0.00793561	2.6224
Mn1	protein_coding	chr5:111418166-111457025	789	790	776	327	403	342	22.181	21.642	21.7	8.55036	8.09872	8.34025	3.83695e-07	2.62204
Fam198b	protein_coding	chr3:79884473-79946278	8019	7532	7607	3107	4116	3379	195.234	178.695	184.222	70.3572	71.6337	71.3629	1.92155e-05	2.61608
Fam84b	protein_coding	chr15:60818996-60825599	387	306	323	142	171	151	10.9619	8.44625	9.10066	3.74108	3.46242	3.71024	0.00150794	2.6122
Sema4d	protein_coding	chr13:51685529-51793747	134	92	118	44	72	44	3.16361	2.11657	2.77112	0.966193	1.21512	0.901115	0.00662734	2.612
Tagln3	protein_coding	chr16:45711230-45724531	15	13	9	8	8	1	2.22195	1.87652	1.32611	1.10221	0.847111	0.128497	0.0463095	2.61071
Ost4	protein_coding	chr5:30906516-30907810	1124	1301	1168	486	650	514	286.022	322.61	295.645	115.028	118.237	113.461	7.29853e-05	2.60805
Clec12a	protein_coding	chr6:129349785-129365303	62	49	62	23	33	24	4.65203	3.58272	4.6274	1.60513	1.76999	1.56211	0.00179901	2.60513
ENSMUSG00000111343.1	TEC	chr9:56504825-56506661	64	73	82	28	40	33	6.00196	6.67118	7.6493	2.44233	2.68152	2.68458	0.00100435	2.60263
Lama1	protein_coding	chr17:67697127-67822645	300	276	221	96	162	113	5.35016	4.79646	3.92042	1.59239	2.06523	1.74813	0.00276352	2.60224
Exoc8	protein_coding	chr8:124890299-124897705	750	763	769	324	353	364	17.4438	17.293	17.791	7.00903	5.86898	7.34397	2.15263e-05	2.59756
Hspa1b	protein_coding	chr17:34956429-34959238	1832	1935	1788	793	895	852	112.316	115.602	109.038	45.2191	39.2235	45.3112	1.52526e-05	2.59688
Anxa1	protein_coding	chr19:20373434-20390671	13412	13272	14589	5368	7593	6131	1656.31	1597.17	1792.12	616.586	670.3	656.794	6.61963e-05	2.5959
1500015O10Rik	protein_coding	chr1:43730602-43742564	170	195	165	57	115	77	32.9806	36.8647	31.8411	10.2853	15.9483	12.9583	0.000735332	2.59457
Nova1	protein_coding	chr12:46694517-46819194	224	150	196	98	68	90	3.79185	2.47435	3.3003	1.54298	0.822847	1.32158	0.0111646	2.59436
4921531C22Rik	lncRNA	chr2:179976853-179979013	57	45	37	18	29	18	5.15469	3.96558	3.32831	1.51402	1.8747	1.41205	0.00997448	2.59303
Tssc4	protein_coding	chr7:143068092-143071093	810	851	820	334	430	379	47.8378	48.9759	48.172	18.347	18.1536	19.4167	5.54937e-07	2.59286
Parva	protein_coding	chr7:112427706-112591688	6855	6685	6650	2823	3625	2874	252.285	239.746	243.445	96.6335	95.3673	91.7529	2.96448e-06	2.59195
Gm26679	lncRNA	chr14:120384261-120388161	22	16	24	11	8	9	2.15466	1.52701	2.3381	1.00203	0.560085	0.764625	0.0112679	2.58721
Mien1	protein_coding	chr11:98437708-98438988	363	368	344	143	212	146	84.0536	83.0355	79.2323	30.7977	35.0908	29.3259	2.43271e-05	2.58702
Fam214b	protein_coding	chr4:43032414-43046220	1309	1430	1358	585	709	595	56.1524	59.7766	57.9459	23.3409	21.7411	22.1409	6.55542e-06	2.58654
Folr1	protein_coding	chr7:101858331-101870788	40	33	37	11	24	17	4.24062	3.40918	3.9018	1.08466	1.81881	1.56339	0.00186934	2.58606
Cyb5r3	protein_coding	chr15:83153495-83172208	9609	10845	10188	4432	5347	4354	752.451	827.553	793.566	322.799	299.307	295.759	3.14754e-05	2.58597
Mettl7a1	protein_coding	chr15:100304145-100328665	574	518	565	246	289	230	37.8438	33.2797	37.0532	15.0852	13.6204	13.1541	0.000131239	2.58427
Sh3bp4	protein_coding	chr1:89070462-89155068	717	781	714	300	415	313	23.7632	25.2234	23.5385	9.24784	9.832	8.9987	1.4245e-05	2.58294
Rasgrp1	protein_coding	chr2:117279993-117342877	16	17	23	7	10	9	0.539941	0.559039	0.772056	0.219714	0.241232	0.263462	0.00715433	2.58285
Rsu1	protein_coding	chr2:13076967-13271416	2660	2717	2841	1077	1504	1242	287.847	286.507	305.805	108.4	116.342	116.587	1.20524e-05	2.57863
Wdr62	protein_coding	chr7:30240138-30280421	280	296	245	99	148	135	9.50109	9.78754	8.26944	3.12452	3.58992	3.97373	0.000435173	2.57837
Lamb2	protein_coding	chr9:108479857-108490530	16609	17531	16583	7529	8584	7303	508.317	522.835	504.834	214.319	187.797	193.884	5.54975e-06	2.57716
Mirg	lncRNA	chr12:109734981-109749458	107	114	92	34	45	65	14.1796	14.7214	12.1272	4.19074	4.26284	7.47209	0.00334981	2.57623
Plekhg3	protein_coding	chr12:76533246-76580489	2274	2190	2059	948	1099	969	53.2274	49.9523	47.9397	20.6389	18.3886	19.6751	5.11884e-05	2.57432
Fzd3	protein_coding	chr14:65192441-65262463	243	199	184	76	146	76	3.28542	2.62183	2.47456	0.955721	1.41106	0.891349	0.00460366	2.57258
Map6	protein_coding	chr7:99267180-99337137	3250	3244	3299	1357	1835	1377	46.2646	45	46.7135	17.9671	18.6728	17.0039	2.36398e-06	2.57212
Ndrg4	protein_coding	chr8:95676985-95715119	2784	2714	2798	1217	1427	1208	122.663	116.526	122.628	49.8734	44.9446	46.1702	8.19256e-06	2.56629
Dock3	protein_coding	chr9:106892825-107231909	38	42	30	12	17	22	0.711648	0.766475	0.558853	0.209024	0.227582	0.357399	0.00595585	2.56544
ENSMUSG00000086083.1	antisense	chr16:33966239-33967312	7	8	6	3	5	2	1.38772	1.54547	1.18317	0.553168	0.708566	0.34394	0.0049214	2.56363
Hs3st3a1	protein_coding	chr11:64435332-64522835	48	56	63	31	28	18	2.10252	2.3903	2.74494	1.26297	0.876726	0.683944	0.00428811	2.56328
Fzd2	protein_coding	chr11:102604431-102608058	2135	2124	2062	907	1165	881	101.38	98.2825	97.3954	40.0586	39.5447	36.2895	3.64956e-06	2.56322
Cltb	protein_coding	chr13:54592939-54611405	2338	2402	2256	1004	1314	955	228.462	228.723	219.282	91.2508	91.7853	80.9511	8.11241e-06	2.5625
Ccr5	protein_coding	chr9:124121543-124127183	40	40	69	13	37	22	2.35509	2.29496	4.04103	0.711909	1.55725	1.12362	0.0469253	2.56164
Fdps	protein_coding	chr3:89093588-89101967	848	786	890	368	407	395	99.9927	90.3153	104.389	40.3602	34.3063	40.4035	0.000205212	2.56103
Kdelc2	protein_coding	chr9:53383824-53401867	961	895	996	388	554	399	42.4612	38.5353	43.7747	15.9453	17.4979	15.293	0.000119082	2.56013
ENSMUSG00000112766.1	antisense	chr10:51489530-51522447	11	8	9	3	4	6	2.16822	1.53662	1.76461	0.550003	0.56361	1.02592	0.0101331	2.55638
4930486L24Rik	protein_coding	chr13:60842612-60864416	27	47	36	12	22	18	3.38778	5.74667	4.49313	1.40044	1.97325	1.95918	0.017385	2.55539
Lonrf2	protein_coding	chr1:38793652-38836715	61	77	49	21	29	37	1.51664	1.86556	1.21183	0.485628	0.515415	0.798	0.012023	2.55359
Fam212b	protein_coding	chr3:105704599-105720842	361	326	381	129	198	176	11.6945	10.291	12.277	3.88684	4.58508	4.9458	0.000477841	2.55353
1700052K11Rik	lncRNA	chr11:105179020-105181433	127	108	138	54	57	62	9.06335	7.51062	9.79623	3.58436	2.90782	3.83819	0.00183751	2.55269
1700007K13Rik	protein_coding	chr2:28462001-28466324	13	29	24	10	13	8	2.78554	6.05524	5.11531	1.99296	1.99121	1.48698	0.0455874	2.55085
Ilk	protein_coding	chr7:105736590-105742925	4054	3845	3981	1731	2024	1797	353.264	326.497	345.066	140.296	126.076	135.835	2.06101e-05	2.548
Gm39795	lncRNA	chr2:35267662-35280451	161	115	138	56	70	68	4.52911	3.15248	3.86154	1.46524	1.40764	1.65938	0.00446526	2.54688
ENSMUSG00000111312.1	TEC	chr9:44481514-44483803	149	214	136	95	67	66	11.2092	15.688	10.177	6.64727	3.60304	4.30705	0.0175711	2.54676
Arhgap23	protein_coding	chr11:97404393-97502402	4358	4425	4105	2043	2164	1806	108.761	107.613	101.904	47.4227	38.6055	39.0977	5.49975e-05	2.54366
Fnta	protein_coding	chr8:25998722-26015601	1134	1104	1313	520	613	531	103.86	98.5302	119.617	44.2965	40.133	42.1869	0.000539153	2.54317
Slc26a8	protein_coding	chr17:28637779-28690418	14	13	14	4	5	10	0.479207	0.433616	0.47667	0.127347	0.122341	0.296924	0.00902643	2.54201
Myo1f	protein_coding	chr17:33555707-33607764	213	207	190	83	108	96	9.57334	9.0661	8.49438	3.46972	3.46988	3.74287	7.20328e-05	2.54003
Sh3bgrl3	protein_coding	chr4:134127406-134128753	1620	1977	1622	737	974	751	394.746	469.436	393.141	167.033	169.656	158.742	0.000560803	2.53783
Pip4k2a	protein_coding	chr2:18842255-18998400	1273	1214	1313	539	662	586	31.7559	29.5108	32.5803	12.506	11.8049	12.6807	3.81069e-05	2.53699
Wls	protein_coding	chr3:159839695-159938670	8667	7989	8870	3485	4464	4072	500.204	449.301	509.209	187.074	184.166	203.862	0.000115062	2.53644
LOC108169037	lncRNA	chr5:31201776-31202798	8	9	7	2	2	7	1.50459	1.64944	1.30954	0.349856	0.268884	1.14202	0.0380437	2.53502
Mecom	protein_coding	chr3:29951296-30509783	379	400	409	162	232	170	7.22899	7.43473	7.7599	2.874	3.16325	2.81279	1.79019e-05	2.53373
Syn2	protein_coding	chr6:115134902-115282626	10	9	9	7	5	1	0.298985	0.262215	0.267662	0.194662	0.106863	0.0259357	0.0288524	2.53118
Pacs2	protein_coding	chr12:113014507-113074401	1619	1811	1566	765	870	714	49.1477	53.5725	47.2871	21.5999	18.8792	18.802	0.000129825	2.53044
ENSMUSG00000102912.1	TEC	chr4:108622929-108625216	20	27	33	8	20	11	1.5059	1.98106	2.47158	0.56026	1.07647	0.71847	0.0194564	2.52995
Fam83d	protein_coding	chr2:158768099-158786637	305	323	252	111	175	134	21.2901	21.9708	17.4974	7.20665	8.73218	8.11393	0.00111045	2.52604
Cox6b2	protein_coding	chr7:4751792-4753094	97	92	100	30	65	45	27.0838	25.0318	27.7736	7.79097	12.9735	10.8993	0.000723901	2.52304
Cdkn3	protein_coding	chr14:46760465-46771530	52	67	74	25	43	25	10.0655	12.6379	14.2482	4.50096	5.94988	4.1978	0.00506142	2.52252
Gm32336	lncRNA	chr17:78396321-78400623	9	6	10	3	5	4	0.825599	0.536346	0.912476	0.255965	0.327872	0.3183	0.0168693	2.52115
Klhl23	protein_coding	chr2:69821918-69836651	160	151	177	71	79	80	5.45282	5.0147	6.00025	2.25057	1.92458	2.36505	0.000459316	2.51793
Fkbp14	protein_coding	chr6:54577602-54593698	1939	1670	2077	839	977	874	99.6544	83.6376	106.182	40.1064	35.8939	38.9654	0.00103364	2.51791
Tpk1	protein_coding	chr6:43344999-43666486	73	73	71	30	33	39	4.36518	4.25372	4.22311	1.66853	1.41059	2.02299	0.000145935	2.517
Msx2	protein_coding	chr13:53466881-53472780	42	30	32	17	17	15	3.34669	2.32946	2.53636	1.25994	0.968329	1.03683	0.00692737	2.51524
Cryl1	protein_coding	chr14:57275034-57398483	124	131	133	50	77	59	15.1504	15.597	16.164	5.68207	6.72514	6.25323	2.35768e-05	2.51395
ENSMUSG00000086331.1	sense_intronic	chr16:92094568-92096490	7	4	7	1	5	3	1.25617	0.699484	1.24952	0.166911	0.6414	0.467005	0.0493987	2.51324
Serpinb9	protein_coding	chr13:32997061-33017955	764	771	884	330	418	401	24.3918	23.9868	28.0735	9.79935	9.53969	11.1057	0.000380879	2.51118
Steap3	protein_coding	chr1:120226414-120271082	478	545	459	227	236	235	24.8934	27.658	23.7774	10.9955	8.7857	10.6163	0.000334872	2.51102
Zdhhc2	protein_coding	chr8:40423002-40489592	174	163	159	83	71	78	6.69702	6.11345	6.08729	2.97128	1.95343	2.60421	0.000450831	2.51002
ENSMUSG00000100039.1	antisense	chr9:106452181-106452918	53	39	68	26	34	17	16.5709	11.8823	21.1482	7.56096	7.59901	4.61072	0.0252064	2.50884
Ada	protein_coding	chr2:163726571-163750239	306	357	313	139	206	125	30.9367	35.1712	31.4769	13.0708	14.8877	10.9626	0.000363839	2.50725
B3gnt8	protein_coding	chr7:25627588-25629492	17	14	24	9	9	8	1.53736	1.23374	2.1589	0.757012	0.581805	0.627577	0.0235306	2.50713
5930403L14Rik	lncRNA	chr4:154630691-154636367	68	45	71	31	36	21	2.06354	1.33071	2.14317	0.87498	0.780933	0.552805	0.0158043	2.50707
Siglecg	protein_coding	chr7:43408193-43418349	290	288	354	136	159	148	17.9841	17.404	21.8367	7.84444	7.04847	7.96162	0.00128284	2.50387
Fat1	protein_coding	chr8:44935046-45052257	48252	46129	44466	20890	23440	21593	515.991	480.693	472.987	207.777	179.181	200.304	4.85981e-05	2.50258
Cobl	protein_coding	chr11:12236676-12464960	236	214	251	82	125	129	6.44836	5.69794	6.8219	2.08393	2.44149	3.05757	0.000959053	2.50141
Nrros	protein_coding	chr16:32142785-32165589	120	95	98	51	55	43	4.9198	3.79539	3.99657	1.94478	1.61189	1.52927	0.00232148	2.49939
Pkn1	protein_coding	chr8:83666533-83699179	2215	2075	2014	1015	1086	895	52.3873	47.823	47.3812	22.3281	18.3607	18.3622	0.000142093	2.49939
AF357359	snoRNA	chr12:109650709-109650738	150	132	182	54	101	71	861.375	738.655	1039.6	288.422	414.601	353.679	0.00507639	2.49799
Ankrd44	protein_coding	chr1:54645340-54926732	610	563	528	238	307	270	12.891	11.594	11.0991	4.67809	4.63772	4.94962	0.000197099	2.49443
Ptger1	protein_coding	chr8:83666640-83672756	972	931	907	470	477	389	33.4635	31.2336	31.0604	15.05	11.739	11.6173	0.000150796	2.49328
Glipr1	protein_coding	chr10:111985448-112002621	846	868	912	347	505	414	112.198	112.176	120.31	42.8031	47.8754	47.6281	2.6725e-05	2.49217
Kcnma1	protein_coding	chr14:23292291-24004952	125	152	147	44	92	71	1.3412	1.58926	1.56891	0.439107	0.705635	0.660835	0.0014282	2.49193
Ttc28	protein_coding	chr5:110879784-111289780	3114	3224	2799	1363	1671	1344	45.4515	45.8555	40.6375	18.5037	17.4347	17.0168	0.000109561	2.49163
Col27a1	protein_coding	chr4:63214009-63334991	109	132	96	45	63	54	1.94611	2.29658	1.70493	0.747284	0.804059	0.836341	0.00240254	2.49095
Ccdc65	protein_coding	chr15:98708227-98723336	40	42	40	19	14	24	3.66543	3.75043	3.64602	1.61939	0.917065	1.90777	0.0017307	2.48905
Wdr1	protein_coding	chr5:38526813-38561800	8426	8513	8480	3635	4529	4024	457.338	450.261	457.832	183.507	175.722	189.462	5.1833e-07	2.48852
Il6ra	protein_coding	chr3:89869324-89913196	183	197	186	87	112	74	9.33561	9.79319	9.43841	4.12804	4.08429	3.27471	5.18015e-05	2.48691
Gadd45b	protein_coding	chr10:80930091-80932204	687	731	735	322	402	312	93.4858	96.9332	99.488	40.7547	39.1041	36.8292	9.98464e-06	2.48446
Edil3	protein_coding	chr13:88821472-89323225	212	196	188	82	85	116	6.81641	6.14105	6.01274	2.45226	1.95365	3.23539	0.00109078	2.48259
Ppp1r13l	protein_coding	chr7:19359719-19378540	754	715	635	363	357	284	34.4094	31.7964	28.8253	15.408	11.6461	11.2428	0.000824033	2.48143
Galnt16	protein_coding	chr12:80518277-80603896	198	171	180	87	89	86	7.94745	6.68845	7.1867	3.24799	2.55364	2.99441	0.000487225	2.48096
Sh3pxd2a	protein_coding	chr19:47260174-47464613	10103	10852	9683	4712	5259	4701	159.43	166.877	151.993	69.1604	59.3239	64.3515	5.05004e-05	2.48035
Xk	protein_coding	chrX:9272784-9313245	77	86	79	36	30	48	2.63041	2.86285	2.68445	1.14385	0.732592	1.42241	0.00156109	2.47896
Gm13688	pseudogene	chr2:80581361-80603571	20	21	22	13	11	6	2.77863	2.84306	3.04031	1.67988	1.09245	0.723105	0.00400545	2.4781
Gm29686	lncRNA	chr16:51981033-51987287	43	44	45	14	35	17	6.62596	6.60693	6.89744	2.00651	3.85528	2.27237	0.0023909	2.47479
Wrb	protein_coding	chr16:96145355-96157852	406	386	392	159	195	215	26.3839	24.4437	25.3392	9.61043	9.05847	12.1199	0.000159909	2.47384
Nhs	protein_coding	chrX:161833290-162159441	386	349	343	187	170	157	3.79513	3.34373	3.3545	1.71007	1.1948	1.33902	0.000620297	2.47258
S100a6	protein_coding	chr3:90612894-90614414	11810	14434	12987	4999	7765	6333	2829.72	3370.13	3095.26	1114.06	1329.97	1316.29	0.000417735	2.47189
Bag2	protein_coding	chr1:33745484-33757750	747	749	743	316	414	354	65.0933	63.601	64.402	25.6115	25.7884	26.7589	2.7263e-07	2.47056
Bag3	protein_coding	chr7:128523583-128546981	2638	2882	2457	1237	1485	1133	175.13	186.443	162.25	76.3814	70.4724	65.2476	0.000173899	2.46968
Wisp1	protein_coding	chr15:66891325-66923205	6380	5887	6270	2994	3091	2818	215.682	193.934	210.841	94.1408	74.6964	82.6387	0.000143926	2.46726
Gm13375	lncRNA	chr2:20968874-20970348	183	123	140	73	89	55	22.7627	14.9089	17.3219	8.44556	7.91353	5.93451	0.0111785	2.46678
Itgal	protein_coding	chr7:127296230-127335137	95	123	105	41	61	55	3.01847	3.80833	3.31854	1.21166	1.38548	1.51592	0.00122913	2.46662
Atp6v0d1	protein_coding	chr8:105524470-105566040	1870	2004	1912	886	1064	849	199.23	208.054	202.626	87.7969	81.0329	78.4638	5.75208e-06	2.46634
Phldb1	protein_coding	chr9:44686308-44735212	4022	4481	3879	1921	2351	1732	89.1636	96.8026	85.5381	39.6101	37.2568	33.3076	0.000144	2.46431
Pdcl3	protein_coding	chr1:38987814-38997236	1428	1427	1537	665	804	660	144.202	140.422	154.387	62.4594	58.0373	57.8145	4.00543e-05	2.46205
Kank2	protein_coding	chr9:21766773-21798546	5962	6270	5624	2750	3310	2599	211.643	216.893	198.588	90.7983	83.9939	80.0328	3.88042e-05	2.461
Vim	protein_coding	chr2:13574311-13582826	63872	65321	66046	27029	39804	28864	5999.76	5979.19	6171.12	2361.49	2672.74	2351.96	7.87574e-06	2.4573
2210408F21Rik	lncRNA	chr6:31220351-31337395	43	56	47	21	33	18	7.10924	9.02214	7.72942	3.22929	3.9001	2.58153	0.00226856	2.45711
Dbi	protein_coding	chr1:120113280-120121096	800	825	867	362	485	370	184.993	185.903	199.425	77.8588	80.1706	74.2194	2.25424e-05	2.45565
Dnajb14	protein_coding	chr3:137867675-137916563	1142	994	1123	474	624	495	20.0181	16.9789	19.5809	7.72803	7.81897	7.52683	0.000302695	2.45204
Habp4	protein_coding	chr13:64161866-64186537	608	617	592	277	321	284	40.8038	40.3504	39.5196	17.2906	15.3996	16.5335	3.64557e-06	2.45154
Platr27	lncRNA	chr2:157595577-157597367	2	3	3	1	2	1	0.505206	0.738458	0.753796	0.234948	0.36114	0.219123	0.0128735	2.45024
Zc3h12d	protein_coding	chr10:7832323-7870397	18	22	25	6	18	9	0.727923	0.866966	1.00565	0.225682	0.520347	0.315722	0.0123428	2.44929
Nrbp2	protein_coding	chr15:76085518-76091594	232	230	220	100	128	105	12.3092	11.8914	11.6107	4.93484	4.85465	4.83258	4.2577e-06	2.44913
Arhgap24	protein_coding	chr5:102207198-102905035	1176	1174	1177	550	637	529	16.2636	15.8214	16.1912	7.07464	6.29732	6.3462	4.87602e-06	2.44831
Galnt4	protein_coding	chr10:99108135-99113247	573	605	615	273	325	275	19.3064	19.8641	20.6118	8.55544	7.82776	8.03764	1.10927e-05	2.448
Ndn	protein_coding	chr7:62348277-62349928	1588	1491	1539	708	864	683	165.601	151.515	159.641	68.6718	64.4071	61.7849	3.24431e-05	2.44662
Dad1	protein_coding	chr14:54235485-54253929	1415	1641	1514	634	881	726	65.2662	73.7576	69.4628	27.1991	29.0479	29.0481	8.39975e-05	2.4443
Gm32282	lncRNA	chr17:78199250-78200084	12	13	15	6	10	4	3.48617	3.68025	4.33465	1.62126	2.07671	1.00804	0.0048901	2.44392
BC031181	protein_coding	chr18:75005274-75009934	1150	1197	1254	506	660	595	118.349	120.04	128.369	48.434	48.5533	53.117	3.11055e-05	2.44336
Galnt18	protein_coding	chr7:111471656-111780067	1113	1096	1099	561	561	481	71.8135	68.911	70.5348	33.6672	25.8751	26.9219	8.6827e-05	2.44332
Grin3a	protein_coding	chr4:49661611-49845769	66	64	94	37	45	28	1.46015	1.37975	2.06859	0.761354	0.71166	0.537353	0.0132591	2.44159
Slc22a18	protein_coding	chr7:143473726-143499334	121	135	100	43	84	51	11.5679	12.5767	9.5096	3.82357	5.74056	4.22948	0.00352315	2.43984
Scarf2	protein_coding	chr16:17797282-17808294	3291	3637	3072	1569	1937	1398	169.393	182.422	157.283	75.1143	71.2695	62.4199	0.000255313	2.43816
Zfp69	protein_coding	chr4:120930133-120953427	29	30	23	14	15	11	0.950709	0.95838	0.750019	0.426885	0.351519	0.312818	0.0023417	2.43682
Tm7sf2	protein_coding	chr19:6062821-6067850	119	94	121	43	54	66	13.8612	10.6696	14.0196	4.6586	4.4963	6.6688	0.00426837	2.43624
Fhdc1	protein_coding	chr3:84442191-84480439	998	983	997	423	588	457	26.743	25.6684	26.5747	10.5427	11.2633	10.6229	2.74703e-06	2.43567
Rom1	protein_coding	chr19:8927382-8929356	180	199	168	82	84	99	20.3208	21.8921	18.8656	8.61023	6.77883	9.6951	0.000599071	2.43494
Abcb9	protein_coding	chr5:124061857-124095967	143	151	139	76	89	48	4.7403	4.87768	4.58331	2.34324	2.10895	1.38026	0.00076504	2.43488
Kif1a	protein_coding	chr1:93015455-93101893	7394	7463	6863	3557	3847	3197	147.79	145.36	136.45	66.1275	54.9661	55.4316	7.33284e-05	2.43365
Hoxa4	protein_coding	chr6:52189687-52191703	156	120	124	59	77	61	17.5883	13.184	13.9064	6.18706	6.20579	5.96593	0.00302046	2.43364
Tatdn2	protein_coding	chr6:113697055-113711082	1004	1041	905	462	532	449	51.0972	51.6275	45.8149	21.8695	19.3545	19.8225	0.000131127	2.43322
2310030G06Rik	protein_coding	chr9:50739691-50746521	37	30	22	12	12	19	5.13219	4.05498	3.03541	1.54816	1.18984	2.28615	0.0249486	2.43277
Nox4	protein_coding	chr7:87246405-87398710	554	486	617	239	268	301	20.6358	17.6406	22.8607	8.28021	7.13597	9.72583	0.00206894	2.43167
Creb3	protein_coding	chr4:43562634-43567060	1845	1802	1822	813	972	895	200.915	191.222	197.36	82.3454	75.6641	84.5451	7.63699e-06	2.43037
Mmp17	protein_coding	chr5:129584169-129611099	669	644	579	270	359	303	17.9464	16.8347	15.4499	6.73672	6.88421	7.05089	0.000172306	2.42993
Farp2	protein_coding	chr1:93512104-93621976	334	367	340	147	192	173	14.7086	15.7491	14.8935	6.02107	6.04411	6.60875	1.84959e-05	2.42858
Nr2f6	protein_coding	chr8:71374118-71381952	1997	2128	1952	936	1110	938	77.7828	80.7688	75.6275	33.9089	30.9055	31.6926	1.23053e-05	2.42655
Nsmf	protein_coding	chr2:25054370-25062881	636	676	635	267	415	287	35.1627	36.4199	34.9215	13.73	16.4014	13.7644	3.10671e-05	2.4263
Parp3	protein_coding	chr9:106470322-106476949	2926	3058	3019	1466	1513	1415	152.658	155.471	156.676	71.1397	56.4276	64.04	3.25331e-05	2.42582
Lgalsl	protein_coding	chr11:20823355-20831916	1712	1421	1676	673	907	795	74.2535	60.0584	72.3072	27.1495	28.1208	29.9109	0.000857094	2.42564
Camk2n2	protein_coding	chr16:20619215-20621278	208	244	176	93	138	82	27.951	31.9515	23.5256	11.6239	13.2563	9.55867	0.00356022	2.42251
ENSMUSG00000087600.1	antisense	chr2:173276698-173278428	6	8	5	4	2	3	1.52007	1.97501	1.26002	0.942554	0.362202	0.659302	0.0254963	2.42106
Nfix	protein_coding	chr8:84704712-84800338	6788	6584	6305	3099	3528	3046	141.797	134.024	131.01	60.2117	52.682	55.1958	3.41246e-05	2.42033
Tmem158	protein_coding	chr9:123259057-123260789	83	72	64	33	46	30	8.25091	6.97466	6.32847	3.0512	3.26881	2.58699	0.00215542	2.4199
Dnajc25	protein_coding	chr4:58994800-59023398	636	612	624	306	315	296	46.2113	43.332	45.0993	20.6797	16.361	18.6566	6.24939e-05	2.4174
ENSMUSG00000052143.8	antisense	chr9:60821552-60838200	25	32	37	12	20	15	6.33364	7.90006	9.32416	2.82766	3.62202	3.29651	0.00674177	2.41713
Ctif	protein_coding	chr18:75431205-75697696	1460	1594	1444	684	819	714	39.3433	41.8574	38.7061	17.1438	15.7764	16.6903	2.32146e-05	2.41696
Dok2	protein_coding	chr14:70766037-70778494	29	27	40	15	21	12	1.02251	0.927683	1.40289	0.491918	0.529293	0.367028	0.0129165	2.41535
Tnfsf15	protein_coding	chr4:63724603-63745113	1843	1852	1799	840	1072	811	54.4789	53.3471	52.8967	23.0948	22.6519	20.7957	3.16482e-06	2.41534
Cdkn2a	protein_coding	chr4:89274473-89294619	494	527	524	211	325	236	74.9154	77.8792	79.0442	29.7618	35.2318	31.046	2.53134e-05	2.41399
Med14	protein_coding	chrX:12675371-12762106	1670	1564	1711	728	951	774	30.9321	28.229	31.5237	12.5417	12.5916	12.4361	6.34449e-05	2.4138
Bmp5	protein_coding	chr9:75775365-75900316	84	68	81	32	40	43	3.78132	2.98291	3.62697	1.33982	1.28716	1.67912	0.00176699	2.41313
ENSMUSG00000086444.2	antisense	chr10:120800677-120801794	14	11	12	8	6	4	9.06711	6.94225	7.73066	4.81908	2.77779	2.24724	0.00977893	2.4116
Gm14025	protein_coding	chr2:129024141-129065905	24	16	12	8	11	7	0.3989	0.259143	0.198394	0.123673	0.130693	0.100925	0.0496931	2.41052
Lmo2	protein_coding	chr2:103957995-103981878	72	56	67	31	50	18	6.11628	4.63563	5.6614	2.44934	3.03621	1.32641	0.00860651	2.40949
Arl11	protein_coding	chr14:61306288-61311937	27	31	24	15	13	12	1.55931	1.74461	1.37872	0.805737	0.536686	0.601174	0.0023695	2.40926
Fn1	protein_coding	chr1:71585473-71653234	355382	381748	322510	160114	201962	163560	7266.88	7606.69	6559.79	3045.19	2952.09	2901.21	0.000178043	2.40865
Hist1h1e	protein_coding	chr13:23621777-23622558	30	31	33	15	20	12	6.60902	6.65494	7.23143	3.07355	3.14958	2.29322	0.000297645	2.40659
Scn2a1	protein_coding	chr2:65620740-65767448	238	177	201	83	111	112	4.46202	3.23366	3.74839	1.44732	1.48759	1.82147	0.00403095	2.40604
Utrn	protein_coding	chr10:12382187-12869689	5386	5259	5337	2584	2962	2374	53.7742	51.1655	53.0028	23.9957	21.1398	20.5607	1.97522e-05	2.40414
Slc35b4	protein_coding	chr6:34155875-34177077	1597	1495	1642	719	806	813	71.4235	65.1544	73.0472	29.9087	25.7679	31.541	0.000159836	2.40347
Rexo2	protein_coding	chr9:48468512-48480713	2395	2257	2399	1059	1343	1106	263.641	242.106	262.684	108.427	105.68	105.612	2.97626e-05	2.40346
ENSMUSG00000056753.3	antisense	chr8:84065236-84067287	28	16	27	15	13	7	2.60882	1.45269	2.50233	1.2999	0.865837	0.565761	0.0400036	2.40302
Adgrg1	protein_coding	chr8:94974756-95014208	125	122	133	61	79	50	4.08933	3.88927	4.32801	1.85611	1.84746	1.41893	0.000238208	2.40246
Dpt	protein_coding	chr1:164796732-164824266	943	992	1037	486	512	469	99.3004	101.793	108.621	47.6001	38.5404	42.8412	9.4632e-05	2.40122
Gm40415	protein_coding	chr6:89361355-89362396	6	8	9	4	2	5	1.20754	1.56894	1.80171	0.748758	0.287731	0.872907	0.0230603	2.39771
Impact	protein_coding	chr18:12962942-12992950	2598	2476	2546	1250	1314	1204	54.7956	50.889	53.4146	24.5216	19.8111	22.0284	6.41646e-05	2.39747
Des	protein_coding	chr1:75360292-75368579	110	98	77	55	53	33	6.18279	5.36766	4.30504	2.87533	2.12949	1.609	0.00934527	2.39733
ENSMUSG00000110630.1	antisense	chr8:104442271-104443786	178	218	173	84	105	94	20.2275	24.1405	19.5553	8.87841	8.52943	9.26617	0.0010088	2.39646
Chst2	protein_coding	chr9:95400926-95407270	383	398	422	187	215	196	10.5705	10.7041	11.5853	4.80035	4.24175	4.6925	6.06535e-05	2.39249
Lamtor1	protein_coding	chr7:101905837-101911903	1410	1654	1405	675	870	689	204.813	234.121	203.006	91.1957	90.3368	86.8173	0.000255682	2.39217
Syn3	protein_coding	chr10:86048746-86499025	49	49	28	18	24	21	0.452869	0.441305	0.257412	0.154733	0.158561	0.168362	0.0244532	2.39089
Ddx39	protein_coding	chr8:83715177-83723351	682	712	735	273	413	383	53.9447	54.8796	57.8291	20.0845	23.3519	26.2792	0.000111728	2.39048
Ehd3	protein_coding	chr17:73804841-73832093	677	645	636	323	328	320	31.8836	29.6009	29.7941	14.1486	11.0423	13.0731	0.000111138	2.38549
Lynx1	protein_coding	chr15:74747856-74752979	1769	1816	1768	868	1055	761	77.114	77.1415	76.6624	35.1931	32.875	28.7766	1.86609e-05	2.38441
Zfp568	protein_coding	chr7:29983955-30028282	670	741	732	332	396	343	15.7619	16.9871	17.1293	7.26448	6.65941	6.99966	3.2666e-05	2.38383
Gm10532	lncRNA	chr18:75514645-75522806	90	93	80	41	40	49	6.73827	6.78509	5.95786	2.85511	2.14079	3.18237	0.000765071	2.38207
Cobll1	protein_coding	chr2:65088339-65239481	886	907	977	399	526	466	24.3671	24.3077	26.7276	10.2065	10.341	11.1175	6.65185e-05	2.38126
Cd28	protein_coding	chr1:60746388-60773359	12	10	7	6	3	5	0.478874	0.388872	0.277864	0.222702	0.0855794	0.173085	0.0349945	2.37991
Coro1a	protein_coding	chr7:126699774-126704816	176	179	173	79	88	96	14.2083	14.0815	13.8921	5.93182	5.0783	6.72278	7.27018e-05	2.37873
Plekhg5	protein_coding	chr4:152072433-152115404	426	455	397	200	237	203	15.4666	16.0977	14.3374	6.75381	6.15095	6.3934	8.27962e-05	2.37856
Wsb2	protein_coding	chr5:117357305-117378589	4706	4652	4316	2086	2643	2144	336.68	324.319	307.144	138.808	135.167	133.058	2.80329e-05	2.37854
Laptm5	protein_coding	chr4:130912890-130936148	606	594	640	269	366	294	40.9889	39.1513	43.0594	16.9231	17.6963	17.25	3.24248e-05	2.37519
Nr1h3	protein_coding	chr2:91184061-91202829	91	63	89	29	69	29	7.27135	4.90547	7.07389	2.15528	3.94122	2.01012	0.019244	2.37469
Srf	protein_coding	chr17:46546838-46557214	2239	2338	2124	979	1264	1130	74.6081	75.9177	70.4013	30.3422	30.1083	32.6633	2.12067e-05	2.37266
Pld4	protein_coding	chr12:112760655-112768986	67	82	110	43	43	43	5.54391	6.61184	9.05376	3.30935	2.54342	3.08645	0.0183598	2.37263
Gpx1	protein_coding	chr9:108339080-108340342	3201	3327	3368	1374	1915	1710	527.706	534.473	552.297	210.681	225.674	244.541	1.42e-05	2.3711
Wwc2	protein_coding	chr8:47827595-47990551	3707	3915	3665	1800	2021	1837	126.661	130.352	124.563	57.2038	49.3621	54.4475	1.3467e-05	2.36984
Upf3a	protein_coding	chr8:13785233-13798538	771	742	788	337	459	370	69.9442	65.5946	71.108	28.4355	29.7658	29.1171	2.07776e-05	2.36659
Copz2	protein_coding	chr11:96849876-96861203	1529	1670	1712	770	986	729	283.235	301.455	315.455	132.667	130.564	117.143	7.95565e-05	2.36647
Spata2l	protein_coding	chr8:123232255-123236247	40	50	48	18	33	20	2.68865	3.27499	3.20929	1.12533	1.58561	1.16615	0.00172777	2.36594
Zfp365	protein_coding	chr10:67886105-67912662	630	628	654	309	341	310	25.4953	24.7654	26.3264	11.6308	9.86463	10.8825	2.71585e-05	2.3654
Tmem100	protein_coding	chr11:90030348-90036508	2	2	2	1	1	1	0.167095	0.162828	0.16621	0.0777082	0.059723	0.0724742	6.46689e-05	2.36361
Pdgfrb	protein_coding	chr18:61045150-61085067	18415	19115	18187	9151	9197	9502	521.526	527.528	512.342	241.049	186.191	233.437	7.11048e-05	2.36333
Fasn	protein_coding	chr11:120805958-120824547	4860	4996	4449	2341	2539	2306	84.248	84.3942	76.715	37.7449	31.4625	34.6763	0.000111343	2.36185
Khdrbs3	protein_coding	chr15:68928406-69101215	749	704	685	342	389	346	50.8008	46.5295	46.214	21.5748	18.8602	20.357	7.9531e-05	2.36123
Fbxl2	protein_coding	chr9:113958557-114026787	102	137	135	57	71	61	4.1571	5.44098	5.47291	2.16072	2.0685	2.1566	0.00263414	2.36007
Nkain2	protein_coding	chr10:31689310-32894089	15	21	16	6	13	8	0.322331	0.439741	0.341999	0.119921	0.199692	0.149125	0.00799158	2.35541
Mbnl1	protein_coding	chr3:60472788-60629750	5150	4591	5333	2273	2730	2620	116.219	100.959	119.712	47.7093	44.0393	51.2886	0.000457055	2.35526
D8Ertd82e	protein_coding	chr8:36094625-36147787	779	863	659	373	415	372	26.8297	28.9638	22.5766	11.9487	10.2173	11.114	0.00150352	2.35488
Plekhg6	protein_coding	chr6:125362651-125380954	51	53	51	29	34	16	2.53273	2.56484	2.51932	1.33952	1.20699	0.689267	0.00183024	2.35396
Zfp78	protein_coding	chr7:6362647-6382605	34	46	36	16	17	25	0.764767	1.00827	0.805466	0.334737	0.273342	0.487798	0.00744601	2.35291
Gm30698	protein_coding	chr10:29361396-29362623	21	20	16	12	7	9	3.13227	2.90695	2.37386	1.66477	0.746356	1.16448	0.00977212	2.35291
ENSMUSG00000097692.2	antisense	chr10:86020441-86022329	7	4	6	2	5	2	0.638394	0.355482	0.544297	0.16965	0.325963	0.158223	0.0411196	2.35254
Ang2	protein_coding	chr14:51195486-51195923	13	21	15	9	11	5	5.11319	8.04886	5.86859	3.29248	3.09278	1.70596	0.022669	2.35201
Acap3	protein_coding	chr4:155891875-155907251	956	977	859	465	484	457	35.6174	35.4704	31.8341	16.1135	12.8901	14.7697	0.000220456	2.35125
Lingo1	protein_coding	chr9:56618460-56796956	1201	1274	1102	601	736	485	38.8549	40.1642	35.4633	18.0847	17.0211	13.6111	0.000353004	2.34995
Wwp2	protein_coding	chr8:107436334-107558597	1051	1062	948	499	563	487	38.0301	37.4469	34.1214	16.7941	14.5626	15.2863	0.000110137	2.34972
Dusp1	protein_coding	chr17:26505591-26508472	3860	3829	3496	1722	2176	1791	342.421	330.998	308.489	142.082	137.987	137.822	4.83604e-05	2.34967
Uaca	protein_coding	chr9:60793206-60880370	2024	2117	2155	1069	1142	972	62.3877	63.5881	66.0739	30.6478	25.163	25.9899	5.40093e-05	2.34778
Rwdd2b	protein_coding	chr16:87433331-87440592	103	106	107	44	66	52	8.43362	8.45764	8.71475	3.35091	3.86303	3.69343	9.78175e-06	2.34759
Pdgfc	protein_coding	chr3:81035887-81214040	746	710	772	322	421	391	31.277	29.0076	32.1957	12.5567	12.6176	14.2204	8.51292e-05	2.34753
Gm12059	misc_RNA	chr11:23064686-23076310	7	9	8	5	4	3	0.168331	0.2109	0.19136	0.111833	0.0687598	0.0625803	0.0052682	2.34644
Epha7	protein_coding	chr4:28813047-28967511	141	155	133	62	85	72	2.95652	3.16709	2.77401	1.20917	1.27406	1.30962	0.000131366	2.3459
Wdr5b	protein_coding	chr16:36041190-36042974	45	29	41	18	24	17	4.34307	2.7274	3.93607	1.61581	1.65578	1.42325	0.0127485	2.34439
Cap1	protein_coding	chr4:122859048-122886071	10740	10289	10568	4914	5938	5224	665.073	620.876	650.958	283.031	262.853	280.62	1.39998e-05	2.3435
ENSMUSG00000060380.3	lincRNA	chr9:44468344-44482180	36	24	34	19	20	9	2.90215	1.88537	2.72641	1.42464	1.15254	0.629375	0.0213568	2.34331
Hoxaas2	lncRNA	chr6:52165674-52169451	117	170	134	60	77	77	12.8629	18.2125	14.6539	6.13533	6.05134	7.34334	0.00581144	2.34149
Atg3	protein_coding	chr16:45158784-45188538	1145	1107	1123	505	622	591	95.8479	90.3007	93.5086	39.3189	37.2199	42.9155	2.08632e-05	2.34112
Wdfy4	protein_coding	chr14:32959547-33193856	118	79	101	54	59	39	1.82942	1.1935	1.55756	0.778676	0.653867	0.524498	0.0115998	2.34051
Dact3	protein_coding	chr7:16875317-16887301	2073	2216	1909	1085	1155	905	126.282	131.547	115.676	61.476	50.2959	47.8235	0.000342805	2.34032
Ankrd13a	protein_coding	chr5:114774923-114805821	2448	2357	2325	1178	1309	1136	121.431	113.932	114.719	54.3495	46.4157	48.8816	3.68705e-05	2.33938
Golim4	protein_coding	chr3:75876183-75956949	5431	5498	5889	2504	3403	2716	205.587	202.809	221.744	88.1623	92.0842	89.1856	3.70612e-05	2.33877
Pwwp2b	protein_coding	chr7:139248482-139267253	340	349	342	181	194	149	22.1869	22.1927	22.1993	10.9858	9.04957	8.4344	7.85368e-05	2.33859
Inadl	protein_coding	chr4:98395622-98719603	144	140	169	65	100	69	2.0963	1.98603	2.44721	0.88011	1.04063	0.871343	0.00113426	2.33859
ENSMUSG00000086181.1	antisense	chr3:38874570-38888259	146	188	134	70	97	73	8.86889	11.1286	8.09684	3.95501	4.21207	3.8467	0.0042558	2.33851
Arhgef40	protein_coding	chr14:51984681-52006247	2249	2298	2260	1118	1325	1031	47.1863	46.9832	47.166	21.8173	19.8724	18.7644	7.22076e-06	2.3379
Pbp2	protein_coding	chr6:135309129-135310384	39	51	41	15	24	28	5.34931	6.81663	5.59385	1.91363	2.35316	3.3315	0.00538724	2.33734
Dlx1	protein_coding	chr2:71528113-71533981	11	15	14	4	10	7	0.46424	0.616889	0.587722	0.157015	0.301687	0.256269	0.00739129	2.33415
Slc2a13	protein_coding	chr15:91267691-91573261	268	291	324	154	150	143	7.05851	7.46858	8.48824	3.77252	2.82408	3.26711	0.000974382	2.33333
Fgl2	protein_coding	chr5:21372673-21378386	152	118	135	54	83	72	6.94768	5.25587	6.13797	2.29574	2.71195	2.85482	0.00249392	2.33278
Ms4a14	protein_coding	chr19:11301249-11315875	16	13	13	7	11	4	0.614445	0.486489	0.496594	0.250031	0.30197	0.133252	0.00926844	2.3313
Fhl3	protein_coding	chr4:124695965-124708611	1014	1102	979	536	532	501	74.2401	78.6228	71.2981	36.5004	27.8432	31.8191	0.00020265	2.33106
Tfeb	protein_coding	chr17:47737037-47792416	138	159	163	68	90	78	7.08402	7.95361	8.32305	3.2467	3.30256	3.47332	0.00028538	2.33081
Myof	protein_coding	chr19:37899036-38043577	9567	9438	9465	4479	5515	4590	229.229	220.364	225.584	99.8177	94.4597	95.4016	1.9149e-06	2.33078
Dhrs4	protein_coding	chr14:55478736-55490340	329	332	320	146	189	168	26.7225	26.2776	25.8539	11.0298	10.9736	11.837	2.33253e-06	2.33018
Coil	protein_coding	chr11:88973935-88991613	257	222	313	107	150	150	16.983	14.2956	20.5741	6.57655	7.08566	8.59849	0.00677008	2.32934
Sesn3	protein_coding	chr9:14276301-14326134	555	463	501	248	285	244	44.3062	36.0179	39.7835	18.4143	16.2638	16.897	0.00077108	2.32879
Pdzd4	protein_coding	chrX:73793357-73825033	211	239	220	115	132	96	9.00645	9.94113	9.3409	4.56564	4.02766	3.55461	0.000176891	2.32867
Ralb	protein_coding	chr1:119470305-119504782	1034	1089	1051	503	670	464	77.0136	79.039	77.8653	34.8456	35.6721	29.9788	1.85609e-05	2.32762
Zbtb1	protein_coding	chr12:76370192-76396955	1190	1027	1098	553	613	528	31.0335	26.0988	28.4827	13.4135	11.4275	11.9445	0.000457998	2.32741
Arhgef5	protein_coding	chr6:43265644-43289320	904	1004	901	366	563	522	28.4919	30.8357	28.247	10.7292	12.6844	14.2716	0.000225392	2.32385
Nr4a3	protein_coding	chr4:48044889-48086447	93	76	59	53	33	28	2.53827	2.02132	1.60178	1.34544	0.643838	0.662923	0.0302847	2.32312
Capn2	protein_coding	chr1:182467259-182517483	9407	9799	9693	4577	5695	4596	508.82	516.489	521.514	230.264	220.198	215.647	8.39272e-07	2.32218
Tceal8	protein_coding	chrX:136168984-136172251	1737	1603	1719	754	976	874	126.905	114.124	124.925	51.2369	50.9725	55.391	7.99142e-05	2.32204
Dcaf12l2	protein_coding	chrX:44365457-44368337	46	27	28	19	15	17	2.75066	1.57329	1.66545	1.05673	0.641177	0.881815	0.0457174	2.32172
Wdr47	protein_coding	chr3:108591255-108645719	381	341	399	183	223	172	13.9593	12.1748	14.5414	6.23625	5.84053	5.4666	0.000494052	2.31857
Eif5a2	protein_coding	chr3:28781273-28798846	402	366	425	163	291	173	13.3156	11.8136	14.0029	5.02176	6.89027	4.97085	0.00120122	2.31786
E2f6	protein_coding	chr12:16810903-16826752	1052	1037	1066	460	648	526	35.2251	33.8363	35.5049	14.3261	15.5103	15.2782	6.10455e-06	2.3178
Mir143	miRNA	chr18:61649196-61649258	48	42	37	13	25	28	131.257	111.917	100.642	33.0642	48.8685	66.4185	0.00771811	2.31758
F630028O10Rik	lncRNA	chrX:96239926-96243642	22	19	25	9	12	13	1.3648	1.14859	1.5427	0.519304	0.532151	0.699583	0.00386393	2.31639
Sun2	protein_coding	chr15:79724068-79742536	2824	3033	2873	1412	1671	1412	120.721	126.345	122.165	56.1416	51.0624	52.3602	6.66075e-06	2.31399
Ttll7	protein_coding	chr3:146852367-146984009	675	636	721	318	370	357	10.6294	9.75953	11.2937	4.65763	4.16499	4.87666	0.000259478	2.31272
Hist3h2a	protein_coding	chr11:58954685-58955192	114	103	95	48	53	59	38.6602	34.0379	32.0462	15.1402	12.8482	17.3564	0.00108991	2.30995
Tec	protein_coding	chr5:72755718-72868745	101	104	90	39	86	33	5.55549	5.57443	4.92422	1.99525	3.38148	1.57458	0.00662324	2.30951
ENSMUSG00000087001.2	antisense	chr6:84093772-84107007	21	33	24	11	19	11	0.962943	1.47456	1.09468	0.469145	0.622791	0.437546	0.0151221	2.3094
Atp8a1	protein_coding	chr5:67618139-67847483	82	66	79	35	41	41	1.5154	1.18857	1.45223	0.601609	0.541632	0.657274	0.00174122	2.30834
Glb1l2	protein_coding	chr9:26763042-26806473	13	7	10	4	8	4	0.499794	0.262248	0.382421	0.143034	0.219859	0.1334	0.042968	2.30602
Gng8	protein_coding	chr7:16891736-16895451	229	245	249	124	125	122	19.6371	20.4727	21.2391	9.89002	7.66231	9.07511	0.00013168	2.30397
Fat4	protein_coding	chr3:38885630-39011987	2610	2374	2414	1195	1308	1307	26.3578	23.3623	24.2494	11.2246	9.44244	11.4497	0.000216252	2.30315
Lclat1	protein_coding	chr17:73107985-73243368	2938	2617	2819	1321	1667	1363	104.102	90.3603	99.3567	43.5355	42.2231	41.8941	0.000167293	2.30171
Msto1	protein_coding	chr3:88909616-88913950	511	592	554	246	331	285	48.237	54.4563	52.0192	21.5987	22.3355	23.3375	0.000100639	2.29982
Rnh1	protein_coding	chr7:141160326-141172851	2238	2405	2167	1067	1350	1123	191.341	200.368	184.29	84.8486	82.5066	83.2869	2.09696e-05	2.29809
Atp6v0a1	protein_coding	chr11:101009447-101063719	2088	2055	1932	990	1164	996	86.4481	82.9093	79.5658	38.1235	34.4497	35.7712	3.19021e-05	2.29752
Tiam2	protein_coding	chr17:3326296-3519397	306	325	320	139	180	175	6.00891	6.21905	6.25056	2.53876	2.5267	2.981	3.18869e-05	2.29648
Hacd1	protein_coding	chr2:14026829-14056035	693	758	718	336	447	349	18.7009	19.9327	19.273	8.43338	8.62273	8.16967	8.75238e-06	2.29553
Id3	protein_coding	chr4:136143822-136145392	5644	6775	6009	2694	4291	2727	1020.27	1193.45	1080.5	452.96	554.492	427.626	0.000631459	2.29551
Il1rn	protein_coding	chr2:24336860-24351491	1095	986	1148	504	594	578	66.9653	58.7596	69.8348	28.6681	25.9675	30.6629	0.000511202	2.29265
Mira	lncRNA	chr6:52214491-52215288	168	212	186	80	110	105	36.2684	44.5987	39.9417	16.0636	16.9754	19.6634	0.00100699	2.29229
Taf9b	protein_coding	chrX:106206874-106221158	151	144	154	57	99	81	9.76118	9.07098	9.9024	3.42715	4.57476	4.54213	0.000292692	2.2907
Dhx9	protein_coding	chr1:153455756-153487689	2242	1937	2296	984	1224	1167	83.1161	69.9755	84.6674	33.9295	32.4368	37.5293	0.000806114	2.28844
Vps4a	protein_coding	chr8:107031326-107045756	1040	1021	1007	484	646	480	86.3451	82.6032	83.1627	37.3751	38.3393	34.5696	8.28307e-06	2.28601
Col4a3bp	protein_coding	chr13:96542735-96640167	1512	1387	1560	719	822	780	46.4231	41.4978	47.6432	20.5326	18.041	20.7743	0.000253916	2.28423
Madd	protein_coding	chr2:91137360-91183958	155	169	145	84	73	84	3.02134	3.21012	2.81145	1.52293	1.01718	1.42036	0.000920806	2.28329
Tie1	protein_coding	chr4:118471191-118489849	81	84	62	48	29	38	3.59739	3.63537	2.73898	1.98279	0.920679	1.46398	0.0116272	2.28319
A630019I02Rik	lncRNA	chr13:93094833-93098968	6	8	7	5	5	1	0.345703	0.449167	0.401184	0.26795	0.205934	0.0499805	0.0349107	2.28313
Mmp24	protein_coding	chr2:155775342-155818366	187	192	189	92	107	97	7.48152	7.48542	7.52151	3.42349	3.06013	3.36643	3.14984e-06	2.28308
Nefm	protein_coding	chr14:68119545-68125004	29	24	38	13	25	11	1.54674	1.24738	2.01603	0.644906	0.953164	0.508935	0.0255117	2.28294
ENSMUSG00000097509.1	antisense	chr7:35555367-35556935	72	71	67	28	57	28	7.90555	7.59669	7.3176	2.8595	4.47385	2.6669	0.00202326	2.28193
Inpp5a	protein_coding	chr7:139389109-139579652	2504	2424	2229	1208	1423	1111	136.124	128.41	120.533	61.0801	55.2984	52.3918	0.000153898	2.2816
Sacs	protein_coding	chr14:61138427-61240693	1210	1084	1217	558	656	618	12.675	11.0652	12.6808	5.43662	4.91217	5.61565	0.000294533	2.28138
ENSMUSG00000086560.1	processed_transcript	chr2:28025417-28030437	139	153	125	73	90	56	34.8056	37.3329	31.1343	17.0016	16.1096	12.1639	0.0011597	2.28101
Marc1	protein_coding	chr1:184786767-184811308	7	7	9	3	4	5	0.484113	0.471752	0.619136	0.192976	0.19775	0.299963	0.00737685	2.28033
CYTB	protein_coding	chrM:14145-15288	23337	21812	25809	9805	14643	12946	3514.32	3200.8	3866	1373.34	1576.28	1691.15	0.000750598	2.28004
Ldhd	protein_coding	chr8:111626271-111630322	35	24	32	11	18	19	2.71483	1.81406	2.46898	0.793596	0.998054	1.27843	0.0124845	2.27938
Svil	protein_coding	chr18:4920245-5119293	2699	2621	2737	1310	1605	1310	43.0488	40.7373	43.4238	19.434	18.2996	18.125	1.41773e-05	2.27735
Igfbp6	protein_coding	chr15:102144186-102149512	2116	2420	2168	1032	1374	1123	282.804	315.175	288.219	128.287	131.269	130.196	7.96072e-05	2.27375
Dab2ip	protein_coding	chr2:35558458-35730994	2588	2747	2435	1273	1522	1281	56.2088	58.1387	52.6058	25.7159	23.6299	24.1345	5.70156e-05	2.27208
Mafk	protein_coding	chr5:139791536-139802653	1713	1713	1635	851	952	845	66.361	64.6665	63.0039	30.6632	26.3633	28.3963	2.12391e-05	2.27142
Cdc20	protein_coding	chr4:118432901-118437343	737	727	587	325	423	333	71.1697	68.4114	56.3846	29.1907	29.1995	27.8947	0.00131255	2.27115
Tmem42	protein_coding	chr9:123021037-123023491	67	66	54	31	35	32	9.21919	8.8497	7.39105	3.96746	3.44266	3.8196	0.00121366	2.26719
Nrn1	protein_coding	chr13:36725622-36734477	378	385	418	164	240	222	33.899	33.6451	37.2877	13.6796	15.3856	17.2702	0.000239548	2.26246
Mfap4	protein_coding	chr11:61485378-61488708	381	423	407	208	264	170	39.6597	42.9073	42.1418	20.1382	19.6443	15.3505	0.000213315	2.26196
Mtap7d3	protein_coding	chrX:56794833-56822490	125	148	135	71	82	62	5.37419	6.20057	5.7734	2.83919	2.52014	2.3123	0.000340645	2.26134
Tmem55a	protein_coding	chr4:14864219-14915260	733	653	717	317	395	397	55.3849	48.0803	53.8891	22.2782	21.335	26.0212	0.000382316	2.25972
Gm38794	lncRNA	chr6:39227565-39245345	6	10	7	4	4	4	0.266886	0.433453	0.309719	0.165489	0.127187	0.154342	0.021497	2.25955
Entpd7	protein_coding	chr19:43689689-43733853	360	369	351	194	186	184	10.2511	10.2391	9.94188	5.13809	3.78606	4.545	0.000151384	2.25939
Atp2a3	protein_coding	chr11:72961169-72993043	112	98	88	47	56	54	4.18906	3.57183	3.27398	1.63504	1.49725	1.75203	0.00183503	2.25924
Mlf2	protein_coding	chr6:124931388-124936149	3880	4042	3625	1813	2408	1906	432.919	439.479	402.326	188.151	192.061	184.479	3.47349e-05	2.25738
Itpr3	protein_coding	chr17:27057261-27122223	1374	1502	1310	680	822	709	25.9802	27.6753	24.639	11.9591	11.1106	11.6293	9.09048e-05	2.2564
Tshr	protein_coding	chr12:91400993-91540509	10	10	8	3	6	6	0.353457	0.344432	0.281269	0.0986259	0.151599	0.183966	0.00571699	2.25513
Tlcd1	protein_coding	chr11:78176716-78180820	134	112	89	47	84	50	6.6374	5.40602	4.38508	2.16533	2.97426	2.14839	0.0124819	2.25419
ENSMUSG00000105813.1	TEC	chr3:121424236-121427574	836	967	742	488	510	344	43.1333	48.6182	38.0807	23.4185	18.8098	15.3962	0.00327122	2.25307
Kif16b	protein_coding	chr2:142618340-142901594	439	489	426	213	249	252	7.60088	8.2504	7.33675	3.43014	3.08181	3.78486	0.000222915	2.25196
Cc2d1b	protein_coding	chr4:108619767-108635486	781	792	777	389	428	421	26.0548	25.7471	25.7841	12.0703	10.2067	12.1834	2.44664e-05	2.25145
Hoxc8	protein_coding	chr15:102990539-102994254	890	861	865	406	536	449	64.7213	61.0137	62.5703	27.461	27.8631	28.3239	5.96515e-06	2.25116
Pitpnm2	protein_coding	chr5:124118689-124249760	932	1037	830	498	513	461	17.3354	18.7959	15.3564	8.61549	6.82091	7.4382	0.00106869	2.25087
Slc25a45	protein_coding	chr19:5877799-5885768	168	204	157	68	108	106	11.2923	13.362	10.4971	4.25124	5.18926	6.18058	0.00308652	2.25025
Bahcc1	protein_coding	chr11:120232904-120292297	1397	1356	1262	642	774	710	20.3835	19.2801	18.3163	8.71266	8.07293	8.9865	8.14502e-05	2.24972
Pard3b	protein_coding	chr1:61638667-62642284	271	244	282	125	151	146	5.02222	4.40639	5.1984	2.15461	2.00037	2.34708	0.000481155	2.24959
Skida1	protein_coding	chr2:18036669-18049026	29	30	23	13	19	12	0.414948	0.418296	0.327355	0.17301	0.194338	0.148945	0.00272763	2.24794
ENSMUSG00000110256.1	TEC	chr8:23256635-23258909	116	156	140	74	65	76	8.78414	11.5115	10.5454	5.21201	3.51853	4.99234	0.00400689	2.24742
Ptprm	protein_coding	chr17:66666848-67354459	1224	1359	1176	596	752	649	30.4586	32.9545	29.1092	13.7945	13.3768	14.0095	0.000115348	2.24673
ENSMUSG00000108391.1	TEC	chr4:152006759-152009619	189	169	145	90	102	75	11.3806	9.91649	8.68495	5.04057	4.39048	3.91756	0.00278347	2.24608
Rnf187	protein_coding	chr11:58932288-58938906	2364	2574	2270	1161	1535	1152	210.035	222.854	200.616	95.9422	97.4901	88.7864	7.39862e-05	2.24473
Ptges3l	protein_coding	chr11:101418811-101425333	250	256	258	124	172	114	22.7036	22.6549	23.3061	10.4739	11.1658	8.98068	4.80856e-05	2.24244
Hspa2	protein_coding	chr12:76403854-76406938	458	444	448	248	255	211	28.4639	26.8893	27.695	14.3355	11.3286	11.3753	0.000150008	2.24216
Daam2	protein_coding	chr17:49456022-49564494	402	367	336	202	188	191	7.82892	6.96479	6.50893	3.65898	2.61722	3.2267	0.00131778	2.2417
BC037032	lncRNA	chr15:4020111-4027406	35	40	28	22	24	9	1.30455	1.45284	1.03811	0.76269	0.639457	0.290994	0.0197139	2.2417
Mvk	protein_coding	chr5:114444263-114460591	362	377	371	161	253	184	35.0949	35.6158	35.777	14.5176	17.5333	15.474	2.75714e-05	2.24067
Prkar2a	protein_coding	chr9:108692143-108749512	2636	2595	2621	1204	1602	1390	112.377	107.805	111.146	47.7412	48.8207	51.4041	3.97033e-06	2.23922
Ppfibp1	protein_coding	chr6:146888080-147032025	6825	6620	6950	3338	4154	3396	204.519	193.31	207.162	93.0356	88.9824	88.2769	1.5672e-05	2.23826
Chpf2	protein_coding	chr5:24585991-24594396	4291	4514	4040	2348	2542	1935	120.75	123.782	113.085	61.4554	51.1343	47.2345	0.000240781	2.23757
Myo1g	protein_coding	chr11:6506548-6520960	52	40	39	16	30	25	2.55805	1.91749	1.90838	0.732081	1.05496	1.06683	0.00819344	2.23694
Rbm14	protein_coding	chr19:4800566-4811634	592	528	521	301	285	280	32.1928	27.9794	28.1819	15.2243	11.0787	13.2082	0.000864948	2.23618
Bcam	protein_coding	chr7:19756138-19770532	1043	1073	999	473	656	542	74.6502	74.8364	71.1224	31.4877	33.5628	33.6508	8.38023e-06	2.23512
1700086O06Rik	lncRNA	chr18:38238405-38250565	22	37	36	22	18	10	1.96274	3.21668	3.19475	1.82556	1.14794	0.773908	0.0404222	2.23466
Rnf144b	protein_coding	chr13:47122720-47247991	20	13	11	6	11	7	0.734023	0.464932	0.401575	0.204816	0.288589	0.222857	0.0485105	2.23456
Zfp771	protein_coding	chr7:127244480-127254807	562	750	565	301	400	305	68.1341	88.6046	68.1352	33.9412	34.6654	32.0758	0.00381539	2.2335
Cacnb2	protein_coding	chr2:14604053-14988811	86	82	59	30	41	50	2.25814	2.09813	1.54099	0.732667	0.769562	1.13886	0.0127624	2.23289
E330033B04Rik	lncRNA	chr15:96268564-96275275	17	21	27	7	13	15	0.436334	0.525238	0.689333	0.16711	0.238518	0.333973	0.0264513	2.23216
Atp8b2	protein_coding	chr3:89939481-89963332	4719	4619	4561	2294	2816	2325	136.702	130.388	131.425	61.8089	58.3129	58.4247	5.4428e-06	2.232
LOC105244413	protein_coding	chr2:164878287-164883451	47	42	38	23	21	23	4.20183	3.65895	3.37924	1.9125	1.34205	1.78368	0.00223624	2.23095
Pitx2	protein_coding	chr3:129199878-129219594	56	54	50	26	34	26	3.03473	2.85162	2.69523	1.3105	1.3171	1.22223	0.000105116	2.22908
Slc6a8	protein_coding	chrX:73673133-73682502	3126	3029	2844	1531	1803	1483	135.276	127.731	122.421	61.6224	55.7742	55.6699	7.37787e-05	2.22705
Clta	protein_coding	chr4:44003816-44032848	3175	3558	3129	1599	2071	1637	293.126	320.098	287.35	137.307	136.678	131.102	8.78703e-05	2.22316
Gm53	lncRNA	chr11:96251660-96264484	231	210	267	102	152	129	64.4985	57.1378	74.1554	26.4893	30.3381	31.2447	0.00220668	2.22308
Dnm3os	lncRNA	chr1:162217623-162225550	1086	924	1099	464	690	531	23.5987	19.5658	23.7548	9.37799	10.718	10.0093	0.00099854	2.22284
Vimp	protein_coding	chr7:66079649-66089405	1187	1267	1215	570	782	628	171.696	178.589	174.816	76.6864	80.8584	78.7988	2.04619e-06	2.22177
ENSMUSG00000113165.1	bidirectional_promoter_lncRNA	chr12:85597019-85599191	41	57	62	31	29	25	3.25047	4.40356	4.88933	2.2859	1.64349	1.7193	0.0120192	2.22058
Hspb2	protein_coding	chr9:50751072-50752354	173	173	178	89	97	94	35.4805	34.5745	36.3126	16.9772	14.2207	16.7232	4.30241e-05	2.21964
Eef1akmt1	protein_coding	chr14:57549596-57571569	178	214	184	81	145	90	33.1872	38.8804	34.1242	14.0465	19.3253	14.556	0.00134053	2.21566
Tln1	protein_coding	chr4:43531513-43562583	25928	26021	24447	13679	15188	12196	513.892	502.566	481.973	252.168	215.184	209.686	7.33598e-05	2.21321
ENSMUSG00000098061.1	lincRNA	chr12:109640341-109642351	27	18	20	12	13	10	2.31299	1.50262	1.70426	0.956147	0.796088	0.743121	0.0160893	2.21206
Ncbp2	protein_coding	chr16:31948546-31958472	870	798	926	376	521	507	73.5785	65.7659	77.8999	29.5769	31.4975	37.1954	0.00071699	2.21069
Gm8325	pseudogene	chr3:60876999-60878844	21	16	20	8	12	11	2.09483	1.55531	1.98452	0.742255	0.855695	0.951858	0.00422269	2.20984
Taok2	protein_coding	chr7:126865676-126886296	1806	1859	1807	900	1154	909	34.2502	34.3551	34.0877	15.8753	15.6444	14.954	3.31688e-07	2.2097
Lpxn	protein_coding	chr19:12796197-12833808	43	55	46	16	22	39	4.17342	5.2018	4.44096	1.44437	1.52635	3.28351	0.0201551	2.2091
Pik3ip1	protein_coding	chr11:3329508-3342971	322	370	357	179	187	196	14.0118	15.6894	15.4525	7.24474	5.81683	7.39848	0.000346662	2.20692
Uros	protein_coding	chr7:133686142-133710522	174	164	142	74	109	79	7.35424	6.75459	5.96996	2.90906	3.29323	2.89644	0.000967435	2.20677
Fos	protein_coding	chr12:85473901-85477269	763	799	652	342	473	388	62.8026	64.0865	53.3821	26.1826	27.8306	27.7035	0.000653517	2.20605
Tacc1	protein_coding	chr8:25154552-25256583	3427	3186	3386	1649	1992	1767	61.8595	56.0408	60.7958	27.6851	25.7033	27.668	6.89744e-05	2.20459
Tubb2b	protein_coding	chr13:34127008-34130354	1068	1166	1103	568	653	580	95.7283	101.844	98.342	47.3533	41.8398	45.0969	2.28358e-05	2.20354
Klhl21	protein_coding	chr4:152008891-152017677	932	1041	905	473	617	474	41.2222	44.8675	39.816	19.4585	19.5078	18.1862	0.000126882	2.20298
Lca5l	protein_coding	chr16:96158405-96192257	25	38	43	18	31	10	1.35821	2.01176	2.32375	0.909561	1.20391	0.471276	0.0433826	2.20281
Irak2	protein_coding	chr6:113638467-113695026	598	574	550	265	355	316	30.3269	28.3665	27.745	12.4999	12.8695	13.9016	5.8688e-05	2.20108
Msra	protein_coding	chr14:64122621-64455903	93	99	65	23	54	64	1.55398	1.612	1.08037	0.357458	0.645008	0.927669	0.0305338	2.20003
3110056K07Rik	lncRNA	chr12:70991615-71015823	46	38	39	20	26	21	4.9872	4.01466	4.20589	2.01679	2.01502	1.975	0.00128649	2.19879
Nagk	protein_coding	chr6:83795005-83802556	768	734	853	392	498	392	73.2598	68.2287	80.9372	34.7795	33.958	32.437	0.000423827	2.19844
Hdac9	protein_coding	chr12:34047580-34917095	81	103	101	41	69	47	0.906416	1.12317	1.12424	0.426736	0.551949	0.456236	0.0021766	2.19791
ENSMUSG00000044306.4	antisense	chr1:170214860-170216422	141	136	113	70	83	59	15.5411	14.6073	12.389	7.1762	6.53957	5.64111	0.00172317	2.19753
Aamdc	protein_coding	chr7:97550329-97579509	102	137	115	51	63	77	17.6604	23.1146	19.8058	8.21301	7.79736	11.5648	0.0051791	2.19693
Adamtsl5	protein_coding	chr10:80339793-80349039	1392	1519	1227	711	844	693	55.9773	59.5247	49.0808	26.5935	24.2618	24.1744	0.000706152	2.19357
Cebpa	protein_coding	chr7:35119293-35121928	655	674	716	354	442	320	42.8074	42.9243	46.5462	21.5186	20.6494	18.1416	0.000112732	2.19332
E030011O05Rik	lncRNA	chr9:96731575-96752831	133	105	118	61	74	59	30.0296	23.1022	26.5017	12.8103	11.9437	11.5558	0.0020785	2.19317
ENSMUSG00000107651.1	antisense	chr6:76496082-76497524	4	4	3	1	2	3	1.33806	1.30389	0.998231	0.311134	0.478247	0.870534	0.0289491	2.19299
Strn	protein_coding	chr17:78649908-78736914	1254	1132	1271	631	710	642	25.5994	22.5188	25.809	11.981	10.3609	11.3688	0.000324243	2.19298
Gm36033	lncRNA	chr9:63935908-63944101	107	123	122	67	67	56	5.69636	6.38095	6.46053	3.31758	2.54974	2.58614	0.00064545	2.19293
Tuba1a	protein_coding	chr15:98949847-98953501	8997	9071	9890	4207	6089	5023	974.204	957.137	1065.23	423.699	471.309	471.807	0.000127222	2.19237
Gmppb	protein_coding	chr9:108049267-108051936	659	637	580	323	415	288	62.6541	59.0161	54.8513	28.5627	28.2046	23.7523	0.000304745	2.19228
Dclk1	protein_coding	chr3:55242369-55539068	1672	1503	1860	900	961	867	20.8939	18.3025	23.1202	10.4607	8.5845	9.39837	0.00164398	2.19089
Chst15	protein_coding	chr7:132235779-132323534	529	535	593	314	318	265	16.0985	15.8654	17.9506	8.88775	6.91773	6.99559	0.000607019	2.18913
Agfg2	protein_coding	chr5:137650463-137684806	348	336	346	160	201	200	19.944	18.7646	19.7244	8.52877	8.2345	9.9429	7.83906e-05	2.188
Isoc2b	protein_coding	chr7:4844959-4866179	82	124	96	51	71	44	12.5793	18.5366	14.649	7.27689	7.78589	5.85524	0.0107981	2.18782
ENSMUSG00000108511.1	antisense	chr7:121981761-121989116	36	61	38	20	24	29	8.2692	13.6539	8.68239	4.27291	3.94076	5.77841	0.0383111	2.18735
Hoxb5os	lncRNA	chr11:96291037-96306910	116	144	115	67	76	61	34.2777	41.4651	33.8023	18.4146	16.0537	15.6363	0.00165157	2.18633
Gm10052	transcribed_pseudogene	chr9:123688848-123690275	277	281	308	133	195	149	33.4175	33.0345	36.9606	14.9238	16.8165	15.593	0.000165705	2.18477
Ehd4	protein_coding	chr2:120089487-120154575	940	959	999	426	608	556	45.823	45.5555	48.4413	19.3152	21.1869	23.5115	7.73691e-05	2.18422
Gli2	protein_coding	chr1:118834061-119053619	151	145	123	72	87	70	3.54988	3.32179	2.87632	1.57435	1.46205	1.42753	0.000965443	2.18372
Cx3cl1	protein_coding	chr8:94772180-94782427	453	434	399	242	277	185	24.8221	23.1737	21.7474	12.3336	10.8499	8.79349	0.0007519	2.18105
Phlda3	protein_coding	chr1:135766085-135769134	4818	5620	4543	2469	3110	2622	565.795	643.125	530.676	269.678	261.072	267.1	0.000706983	2.18035
Ehbp1l1	other	chr19:5707369-5726461	4980	5133	4666	2498	3127	2491	129.012	129.58	120.238	60.1902	57.9077	55.9788	3.07519e-05	2.17622
Dnah10	protein_coding	chr5:124725085-124834308	20	26	36	18	13	13	0.245441	0.310926	0.439455	0.205458	0.114043	0.138392	0.0470019	2.1748
Cmya5	protein_coding	chr13:93040713-93144724	60	69	55	34	51	18	0.872279	0.977507	0.795356	0.459744	0.530007	0.227	0.0107835	2.17394
Cpeb2	protein_coding	chr5:43232307-43289724	1005	907	936	491	563	505	21.6096	19.0045	20.0194	9.81965	8.65361	9.41938	0.0001948	2.17382
Mprip	protein_coding	chr11:59662473-59780860	14422	14345	13779	7394	8460	7430	123.481	119.685	117.351	58.8824	51.7786	55.1837	1.8307e-05	2.17382
Ccng1	protein_coding	chr11:40748552-40755315	10890	10132	10904	5017	7073	5558	533.582	483.766	531.44	228.639	247.733	236.234	8.44764e-05	2.17341
P4ha3	protein_coding	chr7:100285489-100319699	1228	1254	1236	597	823	634	87.4551	87.0263	87.5588	39.5452	41.8981	39.1674	6.93183e-07	2.17261
Dock2	protein_coding	chr11:34226815-34783909	149	124	134	67	62	91	3.88277	3.14879	3.4734	1.62391	1.15493	2.05706	0.00491936	2.17229
Mlec	protein_coding	chr5:115142981-115158176	10529	10174	10389	5401	6375	5293	304.752	286.958	299.108	145.401	131.901	132.896	1.94001e-05	2.17168
Adap1	protein_coding	chr5:139271876-139325464	27	47	47	22	29	16	1.9389	3.28895	3.35726	1.46943	1.48867	0.996693	0.0343138	2.17081
Map2k3	protein_coding	chr11:60932057-60952803	1484	1468	1415	746	932	729	108.744	104.824	103.138	50.8442	48.8195	46.339	1.12501e-05	2.16918
Rufy1	protein_coding	chr11:50389286-50431605	305	278	311	140	213	145	9.79748	8.70214	9.93733	4.18288	4.89105	4.04047	0.000409789	2.16838
Rhbdf1	protein_coding	chr11:32209585-32222333	1815	1995	1694	988	1169	872	92.2902	98.8527	85.6815	46.7271	42.4914	38.4632	0.000378003	2.16808
Mmp14	protein_coding	chr14:54431598-54442456	22665	24296	20132	11907	13835	11129	1027.26	1073.06	907.624	501.949	448.241	437.552	0.000529828	2.16751
Hck	protein_coding	chr2:153108468-153151441	128	132	156	58	102	73	10.5407	10.5926	12.7785	4.44244	6.00438	5.21474	0.00214806	2.16529
2310039H08Rik	protein_coding	chr17:46772635-46773407	70	78	85	43	53	33	15.6006	16.9396	18.8433	8.91342	8.44357	6.37979	0.00165049	2.16472
Ccdc102a	protein_coding	chr8:94902869-94918098	1183	1288	1104	591	783	607	81.3254	86.2827	75.4927	37.7887	38.4778	36.1976	0.000166886	2.16159
Plekhg4	protein_coding	chr8:105369639-105382862	33	44	32	23	18	18	0.852847	1.10809	0.822625	0.552863	0.332535	0.403533	0.0110607	2.15959
Ephx2	protein_coding	chr14:66084372-66124522	158	189	170	80	118	90	10.5176	12.2599	11.2565	4.95315	5.61497	5.19697	0.000353882	2.15882
Zfhx3	protein_coding	chr8:108704177-108961636	2857	2628	2482	1476	1483	1407	28.8641	25.8725	24.9427	13.8697	10.7102	12.3308	0.000673302	2.15871
Hoxa7	protein_coding	chr6:52215623-52218573	321	357	326	177	209	169	28.3301	30.7028	28.619	14.5294	13.1855	12.9383	6.28512e-05	2.15608
P3h2	protein_coding	chr16:25960323-26105784	75	50	48	30	25	39	5.74761	3.7339	3.659	2.13836	1.36954	2.59263	0.0383523	2.154
Ulk2	protein_coding	chr11:61775598-61855322	1549	1441	1589	825	934	773	43.4404	39.3797	44.3262	21.5193	18.7239	18.8049	0.000217106	2.15327
Sh3tc2	protein_coding	chr18:61952925-62015719	53	56	35	18	40	24	1.48634	1.53037	0.976348	0.469513	0.80188	0.583852	0.0245734	2.15231
Gm38664	protein_coding	chr1:181211962-181236369	7	5	7	2	6	3	0.408235	0.284151	0.406073	0.108486	0.250133	0.151769	0.0287481	2.1522
Dancr	lncRNA	chr5:74093083-74094336	41	53	47	13	47	22	6.81784	8.58826	7.77419	2.01066	5.58686	3.17347	0.0241709	2.1521
Tesk1	protein_coding	chr4:43442277-43448075	1078	1146	1078	572	706	555	51.3018	53.1453	51.0302	25.3188	24.0174	22.9116	8.60383e-06	2.152
Kifc3	protein_coding	chr8:95099828-95202857	978	1076	1099	572	608	557	39.0826	41.9009	43.6854	21.2605	17.3682	19.3085	0.000219993	2.15179
Scn1b	protein_coding	chr7:31116524-31127035	1060	1301	1046	566	678	639	113.777	136.079	111.68	56.5063	52.0217	59.4974	0.00134957	2.15167
Speg	protein_coding	chr1:75375297-75432320	1483	1520	1468	799	918	758	17.8898	17.8679	17.6151	8.96486	7.91615	7.93199	1.18846e-05	2.151
Klhl4	protein_coding	chrX:114474333-114561129	6	6	5	1	6	3	0.26613	0.259335	0.220601	0.041255	0.19024	0.115429	0.0424756	2.15052
Ddit4l	protein_coding	chr3:137623672-137628332	312	307	361	146	224	179	19.7537	18.9408	22.735	8.59765	10.1379	9.83097	0.000922465	2.1504
Ankrd29	protein_coding	chr18:12252357-12306509	131	104	138	58	57	89	4.63314	3.5843	4.85487	1.90794	1.44108	2.73051	0.0127742	2.15022
BC029722	lncRNA	chr2:155817730-155819203	688	666	676	334	464	337	85.1475	80.3201	83.2194	38.447	41.0496	36.1795	2.38781e-05	2.14986
Arid5b	protein_coding	chr10:68092523-68278726	7971	7405	7722	4019	4880	3936	148.647	134.566	143.241	69.71	65.0537	63.6721	7.1372e-05	2.14908
Drp2	protein_coding	chrX:134404628-134456574	103	136	126	51	80	73	2.14226	2.75639	2.60675	0.986593	1.18941	1.31706	0.00303122	2.14866
Cdk14	protein_coding	chr5:4803384-5380251	1831	1642	1890	908	1131	944	54.5359	47.6578	55.9952	25.1543	24.0804	24.3902	0.000404853	2.14858
Jam2	protein_coding	chr16:84774123-84826380	2231	2382	2426	1127	1511	1290	73.7	76.679	79.7175	34.6278	35.6813	36.9664	2.54345e-05	2.14491
Pik3r3	protein_coding	chr4:116221421-116303056	496	449	475	243	285	261	15.129	13.3457	14.4117	6.89393	6.21413	6.90586	0.000176058	2.14283
Duox1	protein_coding	chr2:122313810-122347972	13	12	14	5	9	8	0.41682	0.374933	0.446507	0.149111	0.206279	0.222508	0.00193995	2.1427
Ppm1l	protein_coding	chr3:69316918-69560798	336	419	374	162	245	225	4.35319	5.28992	4.81987	1.95217	2.26904	2.52872	0.00126671	2.14269
Man1c1	protein_coding	chr4:134561690-134704290	1815	1882	1800	984	1150	924	61.5995	62.2425	60.767	31.062	27.9001	27.2033	1.29862e-05	2.1425
Pepd	protein_coding	chr7:34912407-35044708	456	442	437	207	298	244	42.3947	40.0439	40.4132	17.8999	19.8048	19.6782	2.16749e-05	2.14091
Lrg1	protein_coding	chr17:56119678-56121946	9	10	13	4	7	7	1.14595	1.24077	1.6465	0.473715	0.637133	0.773165	0.0152841	2.14076
LOC102637878	pseudogene	chr3:144425212-144427769	45	37	28	9	34	21	3.03064	2.42823	1.87575	0.563764	1.63685	1.22685	0.0464364	2.13996
BC022687	protein_coding	chr12:112808975-112816245	246	327	254	147	143	165	22.1304	28.6661	22.7291	12.3	9.19596	12.8762	0.0053735	2.1391
Adgre5	protein_coding	chr8:83723251-83741311	1647	1771	1616	903	1052	849	85.6953	89.7942	83.6371	43.7002	39.1279	38.3195	4.86481e-05	2.13893
Ablim1	protein_coding	chr19:57033264-57315204	842	868	848	416	535	478	14.3194	14.3847	14.3451	6.5802	6.50391	7.05164	1.5498e-06	2.13795
Fam149b	protein_coding	chr14:20348162-20383491	379	410	471	206	275	225	16.8322	17.7441	20.8074	8.50948	8.73057	8.66831	0.00122775	2.13768
Cnn3	protein_coding	chr3:121426541-121458205	8746	8974	8827	4417	5758	4698	752.231	752.132	755.178	353.347	354.014	350.513	1.07777e-09	2.13593
Mgst3	protein_coding	chr1:167372384-167393797	174	132	135	72	103	74	47.2061	34.8971	36.4315	18.1683	19.9753	17.4153	0.00600894	2.1335
Dap	protein_coding	chr15:31224385-31274338	5863	5849	6057	3101	3594	3239	682.005	663.003	700.841	335.507	298.85	326.834	2.02537e-05	2.12845
Cdh24	protein_coding	chr14:54631992-54642067	51	52	65	26	27	40	2.39597	2.38057	3.03752	1.1361	0.90674	1.63013	0.0104903	2.12745
Limk2	protein_coding	chr11:3343297-3409238	1119	1130	1099	560	716	605	33.8144	33.2749	33.0342	15.7396	15.4665	15.859	2.72437e-07	2.12734
Gm38561	lncRNA	chrX:163975332-163983833	88	65	73	36	52	40	7.77048	5.593	6.41184	2.95665	3.28228	3.0639	0.00555797	2.12573
Vsig10l	protein_coding	chr7:43463062-43472019	110	90	101	53	57	58	4.82809	3.84939	4.40959	2.16367	1.7884	2.20831	0.00180495	2.12439
Gm5785	protein_coding	chr12:51828185-51835675	119	131	99	66	76	54	3.19675	3.42925	2.6454	1.64907	1.45943	1.25836	0.00319223	2.12313
Ccnd2	protein_coding	chr6:127125162-127152188	23886	23973	22655	12150	15295	12292	647.108	632.882	610.509	306.156	296.204	288.872	9.27983e-06	2.12122
Arhgap9	protein_coding	chr10:127321956-127329946	22	27	26	15	10	16	1.39187	1.66458	1.63622	0.882671	0.452254	0.8781	0.00775124	2.12048
Gm16861	lncRNA	chr16:4935164-4939585	33	36	24	17	24	12	3.71331	3.94745	2.68629	1.77922	1.93048	1.17133	0.0156592	2.11985
Adam1a	protein_coding	chr5:121518604-121521695	22	14	19	11	12	8	1.22576	0.760112	1.05301	0.570044	0.477938	0.386654	0.0214593	2.11822
ND4	protein_coding	chrM:10167-11544	10582	9318	10984	5034	6489	5905	1322.94	1135.17	1365.93	585.355	579.907	640.387	0.000787943	2.11782
Dzip1l	protein_coding	chr9:99629501-99670075	1386	1446	1349	722	842	784	29.5658	30.0581	28.6242	14.3251	12.8394	14.5075	2.12051e-05	2.11768
Dlg5	protein_coding	chr14:24133953-24246474	3043	3274	3008	1680	2055	1528	58.6128	61.452	57.6319	30.0977	28.295	25.5307	5.82324e-05	2.11737
Rbm3	protein_coding	chrX:8138975-8145880	3409	3308	3171	1635	2182	1778	150.316	142.138	139.082	67.0548	68.7767	68.008	2.35749e-05	2.11704
Carns1	protein_coding	chr19:4164324-4175677	61	56	51	29	37	29	2.09005	1.86974	1.73817	0.924183	0.906226	0.861935	0.00065669	2.11636
Rilp	protein_coding	chr11:75510094-75513168	31	39	41	23	16	22	3.58665	4.39703	4.71852	2.47508	1.32329	2.208	0.00996619	2.11479
4931428F04Rik	protein_coding	chr8:105280409-105289528	176	166	205	94	127	90	4.70376	4.32322	5.4498	2.33665	2.42629	2.08653	0.0018294	2.11356
Pip5k1c	protein_coding	chr10:81292959-81319974	2170	2165	1993	1150	1309	1104	64.4658	62.6749	58.894	31.7761	27.7982	28.4504	9.11255e-05	2.11344
Ptprd	protein_coding	chr4:75941237-78211895	365	312	418	204	215	196	4.56714	3.80428	5.20262	2.37419	1.92308	2.12744	0.0049576	2.11279
Zmat1	protein_coding	chrX:134971372-135009209	101	86	107	60	59	46	4.96569	4.12025	5.23283	2.74374	2.07357	1.96185	0.00374573	2.11218
Ubxn8	protein_coding	chr8:33619586-33645451	243	208	210	115	148	112	6.65334	5.54963	5.71936	2.92863	2.8967	2.66012	0.000880717	2.11213
ENSMUSG00000110981.1	processed_transcript	chr9:41815604-41838418	49	51	49	22	29	33	1.75974	1.7848	1.75042	0.734866	0.744489	1.02805	0.00065604	2.11173
Tcta	protein_coding	chr9:108302955-108306159	623	646	708	322	396	397	58.3301	58.9391	65.9375	28.041	26.5037	32.2437	0.000420917	2.11096
Tmeff2	protein_coding	chr1:50927523-51187270	339	327	353	151	261	174	17.4906	16.4407	18.1165	7.24629	9.62618	7.78762	0.000467305	2.11061
Iqgap1	protein_coding	chr7:80711583-80815549	15381	15226	14492	7973	10113	7500	350.869	338.464	328.839	169.167	164.91	148.413	3.78111e-05	2.11025
Sorl1	protein_coding	chr9:41964718-42124289	94	78	85	55	39	48	1.44317	1.16695	1.29809	0.785392	0.428019	0.639266	0.00635784	2.1095
Tnks	protein_coding	chr8:34829179-34965690	4869	4604	4628	2464	2943	2562	130.169	119.941	123.071	61.269	56.2425	59.4149	4.11632e-05	2.10924
Lor	protein_coding	chr3:92080271-92083142	13	10	10	8	4	6	1.2589	0.943655	0.963254	0.720559	0.276894	0.504019	0.0275664	2.10847
Abhd16a	protein_coding	chr17:35089235-35102987	762	845	791	409	514	435	54.8344	59.2545	56.6199	27.375	26.4405	27.1542	2.20833e-05	2.10831
Chn2	protein_coding	chr6:54039932-54301812	28	23	26	10	17	17	1.15649	0.925714	1.06819	0.384163	0.501925	0.609089	0.00412332	2.10704
Lcp1	protein_coding	chr14:75131105-75230842	1038	898	1073	529	575	591	36.2868	30.5911	37.3118	17.2005	14.369	17.9221	0.00149912	2.1052
Zfp641	protein_coding	chr15:98285585-98296511	82	72	97	43	56	44	1.90745	1.63207	2.24442	0.930337	0.931181	0.887852	0.00469969	2.10373
Trak2	protein_coding	chr1:58900449-58973482	1746	1682	1790	875	1081	1003	39.7821	37.3453	40.5687	18.5432	17.6066	19.8241	6.01525e-05	2.10269
Exoc4	protein_coding	chr6:33249090-33972943	2492	2310	2495	1239	1563	1348	82.8783	74.8637	82.5387	38.3263	37.1586	38.8895	9.51179e-05	2.10083
ENSMUSG00000103309.1	antisense	chr18:37805718-37807922	2385	2690	2249	1324	1554	1276	186.338	204.801	174.782	96.2132	86.7905	86.4796	0.000445538	2.10003
Sla	protein_coding	chr15:66780819-66831829	31	25	26	13	19	15	1.14163	0.897158	0.952423	0.445285	0.500177	0.479185	0.00231881	2.09961
Hexim1	protein_coding	chr11:103116325-103119725	823	767	840	446	495	436	41.6884	37.8598	42.3243	21.0128	17.9237	19.1581	0.000213414	2.09783
ENSMUSG00000112110.1	lincRNA	chr10:82178235-82201488	12	11	8	8	4	5	1.95582	1.74706	1.29698	1.21275	0.466031	0.706914	0.041232	2.09576
Foxd1	protein_coding	chr13:98354245-98356705	208	187	184	105	109	113	14.5604	12.7561	12.8122	6.83649	5.45437	6.86181	0.000748362	2.0952
1110019D14Rik	lncRNA	chr6:13871569-13896421	32	36	35	18	24	17	3.68011	4.03441	4.00381	1.92538	1.97301	1.69593	0.000136055	2.09468
Hopx	protein_coding	chr5:77086986-77115123	23	26	19	10	21	9	2.62406	2.89058	2.15622	1.06115	1.71266	0.890712	0.0154917	2.09327
LOC108167751	lncRNA	chr1:182487944-182495424	130	138	129	74	91	62	4.1313	4.27355	4.07781	2.1873	2.06724	1.70917	0.000150335	2.0931
Gm28523	lncRNA	chr6:141244767-141250009	134	153	139	58	97	90	6.17077	6.86583	6.36714	2.48425	3.19311	3.59523	0.000931872	2.09259
Snn	protein_coding	chr16:11066298-11074985	718	784	720	388	424	446	42.2018	44.9044	42.0953	21.2115	17.8148	22.74	0.000198538	2.09178
Rsph1	protein_coding	chr17:31255019-31277356	32	43	48	26	16	26	4.73608	6.20161	7.06651	3.57912	1.69277	3.33805	0.0255596	2.0911
Zxdc	protein_coding	chr6:90369483-90403486	613	638	515	306	351	346	15.2564	15.4731	12.7495	7.08346	6.24461	7.46993	0.00132833	2.09054
Lrrc73	protein_coding	chr17:46254165-46257316	49	67	39	27	37	25	6.09933	8.12695	4.82887	3.12596	3.29227	2.69945	0.0274733	2.08991
Srebf2	protein_coding	chr15:82147269-82205379	3025	2933	2872	1594	1848	1589	93.9485	88.7652	88.7244	46.0453	41.0274	42.8092	3.18063e-05	2.08988
Ednrb	protein_coding	chr14:103814615-103844476	26	25	23	12	14	16	1.02851	0.963698	0.905017	0.441518	0.395886	0.54904	0.000951409	2.08968
Peg3	protein_coding	chr7:6703892-6730441	286	271	315	158	176	162	4.68664	4.32745	5.13453	2.40816	2.06165	2.30282	0.000647021	2.08909
Vax2	protein_coding	chr6:83711264-83738304	74	64	58	27	39	46	10.3393	8.71377	8.06087	3.50878	3.89522	5.57528	0.00709582	2.08902
Gm15991	lncRNA	chr8:67949793-68077600	21	14	18	13	11	6	0.193764	0.125878	0.165205	0.111566	0.0725529	0.0480237	0.0355746	2.08858
Abcb10	protein_coding	chr8:123952459-123983122	421	445	444	210	284	257	16.1784	16.664	16.9719	7.50595	7.80153	8.56715	2.48957e-05	2.0865
Gas2l1	protein_coding	chr11:5054131-5065349	1850	1942	1721	1032	1145	965	55.1113	56.3748	50.997	28.5945	24.3827	24.9371	0.000175892	2.08541
Magt1	protein_coding	chrX:105968084-106011899	2193	1984	2191	1105	1432	1121	83.51	73.6221	82.9921	39.1377	38.9808	37.0301	0.00022238	2.08534
Anapc15	protein_coding	chr7:101881300-101901849	337	368	322	181	247	164	13.5078	14.3738	12.8383	6.74788	7.07718	5.70229	0.000313043	2.08527
Pkp4	protein_coding	chr2:59160850-59355205	891	780	725	403	527	446	27.3857	23.3619	22.1656	11.5209	11.5788	11.8913	0.00133346	2.08377
4931406P16Rik	protein_coding	chr7:34236707-34313577	1939	2069	2016	1064	1285	1098	49.0732	51.0263	50.7518	25.0462	23.2476	24.1056	5.26174e-06	2.0836
4933428G20Rik	protein_coding	chr11:97490783-97500340	61	86	54	32	48	36	7.37458	10.1315	6.49375	3.59824	4.14817	3.77537	0.0198561	2.083
Cdnf	protein_coding	chr2:3512966-3526376	94	75	89	52	47	47	5.2663	4.09454	4.95977	2.70965	1.88227	2.28415	0.00426843	2.08267
Arhgef25	protein_coding	chr10:127182521-127190085	2304	2147	2257	1168	1489	1197	116.127	105.451	113.156	54.7553	53.6479	52.3352	5.84621e-05	2.08247
Tada1	protein_coding	chr1:166379167-166393621	265	299	293	144	193	156	20.5551	22.6002	22.6066	10.3889	10.7014	10.4966	7.83219e-05	2.08194
Anxa2	protein_coding	chr9:69453683-69491792	13945	14984	14510	6971	10575	7632	1339.86	1402.93	1386.77	622.974	726.323	636.107	4.50648e-05	2.07996
Ccdc92	protein_coding	chr5:124834432-124862221	57	54	49	26	40	27	3.93259	3.63048	3.36275	1.66844	1.97275	1.61591	0.000681978	2.0783
Ngly1	protein_coding	chr14:16249314-16311926	342	417	395	197	266	203	20.3096	24.1311	23.3328	10.8811	11.2918	10.4573	0.000594359	2.07701
Dbndd2	protein_coding	chr2:164467153-164493323	482	480	522	249	322	284	18.7484	18.1939	20.1968	9.00843	8.95324	9.58263	9.71904e-05	2.07444
Pcgf5	protein_coding	chr19:36347440-36460964	1032	950	955	491	657	548	22.465	20.1519	20.6788	9.94125	10.2235	10.348	0.000104099	2.0744
Tle2	protein_coding	chr10:81574739-81592581	255	267	267	169	153	127	12.2813	12.5309	12.7911	7.57047	5.26747	5.30587	0.00111695	2.07251
Irx3	protein_coding	chr8:91798511-91801654	20	29	36	13	18	18	1.4581	2.06027	2.61069	0.881526	0.938077	1.13836	0.0364947	2.07205
Tmem8	protein_coding	chr17:26112691-26123254	43	54	45	33	30	18	1.39245	1.70401	1.4495	0.993934	0.694448	0.50563	0.0102325	2.07198
Mvd	protein_coding	chr8:122433596-122443422	228	247	214	130	164	105	21.0723	22.2454	19.6736	11.1751	10.835	8.41812	0.000685577	2.07016
Aacs	protein_coding	chr5:125475873-125517403	1323	1448	1416	729	914	772	71.8311	76.6104	76.4734	36.814	35.4737	36.3596	1.80756e-05	2.07014
Pgam2	protein_coding	chr11:5801637-5803796	33	23	37	15	21	18	6.27492	4.26176	6.99827	2.65288	2.85444	2.96904	0.021486	2.06869
Wnt9a	protein_coding	chr11:59306849-59333552	97	90	82	49	57	49	4.91635	4.44509	4.13409	2.30994	2.06516	2.15435	0.000622057	2.06687
ENSMUSG00000106961.1	TEC	chr2:35280390-35282010	36	31	52	24	28	17	3.82597	3.21046	5.49715	2.37238	2.12718	1.56725	0.0407654	2.06593
Gm30368	lncRNA	chr15:78919620-78928144	169	317	231	101	161	154	4.40995	8.0607	5.99589	2.45133	3.00317	3.48592	0.044516	2.06551
Hnrnpm	protein_coding	chr17:33646233-33685458	3061	3027	3007	1560	2013	1694	208.268	200.696	203.51	98.7225	97.9062	99.9819	1.34024e-06	2.06491
Ccdc91	protein_coding	chr6:147475871-147632613	538	540	527	308	370	252	29.3026	28.6605	28.5515	15.603	14.4056	11.9062	0.000182244	2.06406
Dusp3	protein_coding	chr11:101971141-101987005	1266	1206	1355	642	892	693	48.694	45.2018	51.8412	22.9673	24.5253	23.1219	0.000225305	2.06384
Eps8l1	protein_coding	chr7:4460631-4480487	48	45	65	26	31	34	1.22816	1.122	1.65433	0.618757	0.567	0.754644	0.0161331	2.06374
Pitpna	protein_coding	chr11:75588079-75628804	4079	4227	4212	2071	2800	2392	185.951	187.778	190.998	87.8129	91.2454	94.5924	2.43221e-06	2.06368
Ace	protein_coding	chr11:105967945-105989964	173	192	156	90	134	81	5.63715	6.09651	5.05629	2.72765	3.12123	2.28954	0.00170013	2.06305
Slc5a3	protein_coding	chr16:92058322-92087473	1019	871	1166	605	575	570	16.0862	13.3987	18.3093	8.88314	6.48864	7.80553	0.00653841	2.06211
Arvcf	protein_coding	chr16:18348182-18407076	316	309	289	152	199	179	10.7971	10.2883	9.82227	4.83054	4.86049	5.30545	7.8245e-05	2.061
Mir5103	miRNA	chr1:34433121-34433199	11	11	14	5	8	8	23.9877	23.3752	30.3681	10.1414	12.4708	15.1333	0.0074402	2.05934
Hdac10	protein_coding	chr15:89123303-89128700	147	137	152	85	105	64	9.36208	8.50242	9.62927	5.03509	4.78026	3.53577	0.00120222	2.05928
Peak1	protein_coding	chr9:56201126-56418230	15001	14665	14589	8303	9668	7656	229.879	218.992	222.382	118.344	105.907	101.772	4.15268e-05	2.05891
Gm9826	pseudogene	chr1:7177675-7179753	3	3	4	1	3	2	0.248593	0.242246	0.329703	0.0770727	0.177704	0.143763	0.0261504	2.05887
Sema4f	protein_coding	chr6:82911884-82939769	44	47	45	16	33	31	1.51451	1.57646	1.54073	0.512237	0.81197	0.925613	0.0031106	2.05869
Plekha7	protein_coding	chr7:116123485-116308383	72	65	62	37	36	41	1.13019	0.994255	0.968064	0.540197	0.40395	0.558279	0.00162948	2.05834
Diras1	protein_coding	chr10:81019589-81025824	10	7	8	4	8	3	0.544313	0.37129	0.433145	0.202508	0.311276	0.141651	0.0310644	2.05779
Slc25a42	protein_coding	chr8:70184340-70212281	220	192	174	99	103	134	11.9485	10.1615	9.40011	5.00101	3.99884	6.31311	0.00589568	2.05774
Lama5	protein_coding	chr2:180176373-180225912	6085	6063	5214	3363	3480	3151	89.9823	87.3677	76.6941	46.2547	36.7861	40.4198	0.000895386	2.05769
Tmem19	protein_coding	chr10:115340739-115362524	959	909	902	486	636	491	49.1117	45.3625	45.9481	23.1492	23.2826	21.8121	4.37036e-05	2.05766
Tmem2	protein_coding	chr19:21777511-21858360	1274	1253	1322	691	847	696	31.6891	30.3709	32.7089	15.9864	15.0602	15.0175	2.65074e-05	2.05732
Mical3	protein_coding	chr6:120931546-121173757	1143	1183	1109	674	668	632	16.5736	16.7156	15.9954	9.08997	6.92394	7.94943	0.000219595	2.05666
Egr3	protein_coding	chr14:70077445-70082613	218	228	214	108	161	118	9.05836	9.23198	8.84507	4.17397	4.78219	4.25329	3.05114e-05	2.05424
Rnf103	protein_coding	chr6:71493877-71510880	703	741	624	386	436	375	34.1924	35.1203	30.1893	17.462	15.1589	15.8218	0.000510852	2.05402
Fam114a1	protein_coding	chr5:64970075-65041901	4111	3988	4355	2227	2858	2183	240.157	227.023	253.064	121.004	119.349	110.624	0.000113552	2.05211
Samd4	protein_coding	chr14:46882965-47105817	3994	3848	3879	2144	2440	2218	81.7375	76.7388	78.9638	40.8104	35.6953	39.3754	4.25429e-05	2.049
Pdrg1	protein_coding	chr2:153008890-153015383	1718	1788	1671	875	1125	1017	240.821	244.233	232.992	114.081	112.728	123.663	1.38428e-05	2.0488
Fam50a	protein_coding	chrX:74313033-74320149	841	828	683	447	509	412	104.76	100.507	84.6283	51.7894	45.3237	44.5192	0.00164718	2.04682
Acss1	protein_coding	chr2:150618111-150668240	20	20	19	14	12	8	0.958682	0.934202	0.905926	0.624173	0.411181	0.332647	0.00571341	2.04591
Btc	protein_coding	chr5:91357261-91402994	57	67	52	22	37	44	3.41435	3.91088	3.09836	1.22571	1.58432	2.28631	0.0104913	2.04531
AA388235	lncRNA	chr17:33981492-33985358	31	28	47	15	22	25	1.38105	1.21555	2.08277	0.621545	0.700613	0.966135	0.0492356	2.04492
[truncated: 1,939 more rows]

## Sheet: DAVID（2倍）
Category	Term	Count	%	PValue	Genes	List Total	Pop Hits	Pop Total	Fold Enrichment	Bonferroni	Benjamini	FDR
GOTERM_CC_DIRECT	GO:0016020~membrane	1285	35.2731	4.45207e-33	CHIC2, TMEM95, GHITM, ZFYVE28, HTR6, HTR7, LIPH, ZC3H12A, WLS, GBP6, GBP5, CXADR, UNC5B, UNC5C, TMEM81, EML4, RUFY1, CH25H, SLC5A7, MYL6, TFR2, PSME2, NGEF, HACD1, HS3ST3A1, TTYH1, ABCB4, ABCB9, IQGAP1, THY1, SLC5A3, LY9, HACD4, CYB5R2, RNF213, CYB5R3, KCNMB1, RDH10, PRKAR2A, PDGFC, SYNDIG1, KCNMB4, KCNE1L, PIP5K1C, PRRT1, ABCA1, GPR17, MYH7B, NGFR, CADM3, JAG1, CADM4, JUP, CADM1, CADM2, ABCA4, N…	2814	6998	19662	1.28302	3.62399e-30	3.62399e-30	3.38357e-30
GOTERM_BP_DIRECT	GO:0007155~cell adhesion	175	4.80373	1.38286e-32	CSF3R, CLSTN2, COL12A1, CTNND1, ICAM2, TNC, CELSR3, ICAM1, CDH6, COMP, CDH3, ALCAM, CYP1B1, TNR, NRCAM, BVES, EPHB1, KIRREL3, POSTN, CXADR, CD93, DSCAM, OMD, ATP1B1, BCAM, MAG, NINJ1, ADAM12, COL8A2, COL8A1, PKP1, PKP4, TLN2, EPHA1, PLPP3, TLN1, VCL, FREM2, GM14025, FBLN7, PCDH10, TTYH1, NTM, DPT, THY1, NID2, LY9, FBLN5, DPP4, NUAK1, ADGRG1, FLRT2, FLRT3, CDH22, CDH23, CLCA2, ABL1, LPXN, CDH24, P…	2634	485	18082	2.47701	8.71343e-29	8.71205e-29	8.46175e-29
GOTERM_CC_DIRECT	GO:0005576~extracellular region	415	11.3917	2.90249e-28	VIT, COL12A1, TSKU, GLDN, ENDOU, PRL2C3, LIPH, LIPG, NAMPT, PRL2C2, CCBE1, CXADR, COL23A1, CLEC11A, DKK2, DKK3, RBP4, SPARCL1, SERPING1, CFB, C4BP, ENDOD1, ADAMTS12, PLA2G7, C2, C3, HPX, ADAMTS14, FLRT2, FLRT3, PDGFC, SFN, GSDMD, ACE, TSLP, COL24A1, RNASE10, FN1, CP, CILP, KITL, SERPINI1, ACHE, TINAGL1, ELN, IL1F9, ADM, SERPINA9, PRSS23, IL18BP, ADAMTSL1, C1QTNF3, C1QTNF1, MMP24, ADAMTSL5, CHL1, …	2814	1753	19662	1.65413	2.36262e-25	1.18131e-25	1.10295e-25
GOTERM_CC_DIRECT	GO:0005578~proteinaceous extracellular matrix	119	3.26654	8.75918e-25	VIT, OLFML2B, COL12A1, TNC, OLFML2A, GLDN, COMP, TNN, TNR, HMCN1, CCBE1, POSTN, COL27A1, OMD, SFRP1, CCDC80, COL4A2, COL4A1, CRISPLD2, COL8A2, SPARCL1, COL8A1, FBLN7, DPT, FBLN1, TNFRSF11B, ADAMTS12, NID2, LTBP1, FBLN5, ADAMTS14, FLRT2, WNT2, WNT4, COL28A1, COL24A1, TGFB3, FN1, BMP4, COL5A1, CILP, ALPL, TGFBI, HPSE, LGALS3BP, ECM2, COL14A1, ELN, HAPLN4, WISP1, WISP2, ADAMTS4, ADAMTSL1, ADAMTS5, A…	2814	316	19662	2.63126	7.12997e-22	2.37666e-22	2.21899e-22
GOTERM_MF_DIRECT	GO:0005515~protein binding	781	21.4384	1.57514e-19	PID1, SPI1, SCX, RBPJ, TSKU, HTR6, ZFP281, ZC3H12A, WLS, GBP5, MEF2C, CXADR, UNC5B, UNC5C, RUFY1, RBP4, MYL6, MYL7, PSME1, PSME2, TXNIP, EXOC3L, NGEF, IQGAP1, NYAP2, C3, CYB5R3, PRKAR2A, KCNMB4, SFN, PIP5K1C, PPARGC1A, ABCA1, NGFR, JUN, CADM3, JAG1, JUP, CADM1, CADM2, FN1, MOV10, GRIN3A, VANGL2, FAT1, MRVI1, FAT4, ACHE, KCNC2, ARHGAP1, JPH2, CASP12, HEY1, MECOM, HEY2, JAK2, SLC18A2, KCND3, PGAM2,…	2559	4092	17446	1.30119	2.82423e-16	2.82423e-16	2.76595e-16
GOTERM_CC_DIRECT	GO:0009986~cell surface	173	4.74883	2.00494e-18	IFITM3, LY6K, CLSTN2, H2-K1, PLAT, ICAM1, TNN, PLAU, ADGRA2, LIPG, KDR, TNR, KCNH1, PPFIA2, PDGFRB, PDGFRA, CXADR, CD93, SCARA5, IL1R1, COL23A1, F2R, MIF, SFRP4, PROCR, SFRP1, BCAM, TYROBP, FCGR4, CD109, ROR1, TLN1, H2-D1, CD274, CSF1R, SDC4, NTM, C5AR1, SLC1A2, THY1, MST1R, TNFRSF11A, NID2, LY9, DPP4, SCUBE3, DPP6, ADGRG2, PDGFC, ADGRG6, CD14, WNT4, FZD1, ABCA1, NGFR, PRNP, FZD3, TGFB2, VCAM1, F…	2814	629	19662	1.92176	1.63202e-15	4.03691e-16	3.76911e-16
GOTERM_BP_DIRECT	GO:0002376~immune system process	123	3.37634	2.3605e-18	IFITM3, IFITM1, NRROS, IFITM2, CLEC4N, LST1, H2-K1, HP, PRDM1, IFIT1, IFIT3, PYCARD, C1S2, ALCAM, C1S1, ZC3H12A, DHX58, TRIM25, MAP3K8, B2M, HERC6, ZBP1, GBP5, RSAD2, CD300A, SP110, CD180, TAP1, ACOD1, CTPS, MIF, NAIP2, BTK, CD300E, SERPING1, SH2D1B1, PRKD1, CLEC4E, CFB, H2-D1, C4BP, CSF1R, ZBTB1, IL4RA, MST1R, ZC3HAV1, LY9, C2, C3, INPP5D, CD300LB, SLAMF7, CD14, GSDMD, CADM1, LY86, SSC5D, SERPIN…	2634	383	18082	2.20464	1.48735e-14	7.43558e-15	7.22195e-15
GOTERM_CC_DIRECT	GO:0005615~extracellular space	335	9.19572	2.47968e-18	IL1RN, COL12A1, ACTB, GLDN, TSKU, ICAM1, C4B, PRL2C3, LIPH, ANPEP, NAMPT, LIPG, DAG1, TNFSF11, B2M, PRL2C2, BRICD5, IL15RA, CCBE1, IL1R1, ACTN1, COL23A1, CLEC11A, OMD, ACTN4, MIF, DKK2, EREG, DKK3, CHIT1, BTC, SFRP4, RBP4, SFRP1, SFRP2, MTHFD2, PAPPA, CD109, SPARCL1, SERPING1, EZR, CFB, NRN1, STC1, PLA2G7, RNASET2A, C3, HPX, PRDX5, FLRT2, FLRT3, STC2, PDGFC, CD14, ARSG, S100A11, GSDMD, ACE, TNFSF…	2814	1504	19662	1.55633	2.01846e-15	4.03691e-16	3.76911e-16
GOTERM_BP_DIRECT	GO:0006954~inflammatory response	112	3.07439	2.79171e-17	NRROS, PYCARD, C4B, NPPB, RPS6KA5, ZC3H12A, MAP2K3, GBP5, IGFBP4, CD180, F2R, CYBB, ACOD1, MIF, NAIP2, PRKD1, PTGFR, CSF1R, SEMA7A, LXN, C5AR1, TNFRSF11B, PLA2G7, C3, CLEC7A, TBXA2R, IRAK2, TNFRSF14, TSPAN2, CD14, GSDMD, CCR1, NGFR, AFAP1L2, EPHX2, TNFRSF9, RARRES2, LY86, CELA1, SELE, BMP6, NFKB2, SELP, IL6, BMP2, BCL6, CSPG4, CXCL9, CD40, TNFAIP3, IL1F9, CXCL1, CXCL3, CXCL2, CXCL5, CX3CL1, POLB,…	2634	344	18082	2.23507	1.75906e-13	5.86259e-14	5.69416e-14
GOTERM_CC_DIRECT	GO:0031012~extracellular matrix	99	2.71754	6.08836e-17	COL12A1, TNC, ACTG1, COMP, POSTN, CD93, OMD, SFRP1, MYL6, COL4A2, COL4A1, COL8A2, COL8A1, DPT, FBLN1, ADAMTS12, NID2, LTBP1, FBLN5, WNT2, HSPA9, TGFB2, JUP, TGFB3, RARRES2, HIST1H4M, TFPI2, FN1, SSC5D, HNRNPM, COL5A1, CILP, HIST1H4I, TGFBI, FGFR2, LGALS3BP, TINAGL1, COL14A1, CPXM2, TGFB1I1, ILK, HSPB1, CLEC14A, PCSK6, ADAMTS4, ADAMTSL1, CASP14, ADAMTS5, MMP24, MMP27, ADAMTSL2, TIMP2, TIMP3, SOST,…	2814	294	19662	2.35283	9.03722e-14	8.25987e-15	7.71192e-15
GOTERM_BP_DIRECT	GO:0001525~angiogenesis	87	2.38814	7.4086e-17	ACVRL1, NRP1, FLT4, TNFAIP2, HIF3A, RBPJ, FGF2, TMEM100, FGF9, HEY1, SOX18, ADGRA2, PLAU, GJA5, ANPEP, ZC3H12A, KDR, CYP1B1, RSPO3, NRCAM, THSD7A, EPHB2, HOXA7, EPHB1, EPHB3, CCBE1, WARS, ANXA2, UNC5B, EREG, GREM1, MMP14, CCDC80, COL4A2, NOV, COL4A1, ANGPTL6, TAL1, COL8A2, COL8A1, MYH9, ANGPTL4, PRKD1, EPHA1, SCG2, CALCRL, ECSCR, NDNF, THY1, PTGS2, HIF1A, RTN4, APOLD1, ADGRG1, RNF213, S1PR1, PTK2…	2634	239	18082	2.49892	6.99552e-13	1.16686e-13	1.13333e-13
GOTERM_CC_DIRECT	GO:0070062~extracellular exosome	527	14.4661	1.62892e-16	RNH1, COL12A1, MRGPRF, ABAT, GHITM, MYLK, GJA1, ALCAM, NAMPT, GAMT, GBP6, GBP9, METTL7A1, RBP4, MYL6, BCAM, DAAM2, PSME1, SPARCL1, PSME2, SERPING1, FREM2, CFB, H2-D1, LXN, CRABP2, SHMT2, ABCB4, ENDOD1, IQGAP1, THY1, ACMSD, RNASET2A, C2, C3, HPX, PRDX5, CYB5R3, FLRT2, PRKAR2A, PDGFC, PLCG2, SFN, RSU1, S100A11, ACE, CADM4, JUP, CADM1, PMM2, FN1, PRDX6, CP, HNRNPM, EHD2, EHD4, CILP, FASN, GIPC2, FAT…	2814	2674	19662	1.37706	9.03722e-14	1.8942e-14	1.76854e-14
GOTERM_BP_DIRECT	GO:0008285~negative regulation of cell proliferation	118	3.23909	6.76395e-16	IFITM3, IFITM1, RBPJ, FGF2, IFIT3, MTBP, GJA1, FTH1, CYP1B1, HIST1H2AD, SOX7, HIST1H2AB, MAP2K1, MSX2, IGFBP3, F2R, P3H2, DLEC1, FOXP3, EREG, SFRP4, SFRP1, SFRP2, PTGES, CSF1R, ZFP503, DPT, NDRG1, CYP27B1, ADGRG1, NACC2, INPP5D, NDN, TGFB2, JUN, FZD5, ERDR1, TGFB3, PTCH1, CAV1, TNFRSF9, HMGA1, TRPV2, LIF, DHCR24, IGF1, INHBA, SMAD6, BMP5, BMP4, FOSL1, H19, IL6, BMP2, RGCC, BCL6, WNK2, NOX4, STRN,…	2634	384	18082	2.10951	4.19731e-12	8.52258e-13	8.27772e-13
GOTERM_CC_DIRECT	GO:0005925~focal adhesion	118	3.23909	8.98984e-16	TNC, SLC4A2, ACTB, ICAM1, ACTG1, GJA1, ALCAM, MPRIP, PLAU, BSG, CAPN2, DAG1, TNS4, B2M, TNS1, PDGFRB, MAP2K1, TLE2, ACTN1, LMO7, ACTN4, SRCIN1, PROCR, TLN2, EZR, TLN1, VCL, FBLN7, SDC4, THY1, IQGAP1, CNN3, DPP4, SLC9A3R2, CNN2, CNN1, FLRT2, FLRT3, PRKAR2A, LPXN, ZFP185, PIP5K1C, RSU1, FZD1, HSPA9, FZD2, JUP, MCAM, CAV1, HMGA1, PARVA, ARPC5, PARVB, ARHGAP24, EHD3, PPFIBP1, ITGA11, FAT1, CASS4, NOX…	2814	391	19662	2.10867	7.22977e-13	9.14716e-14	8.54035e-14
KEGG_PATHWAY	mmu04510:Focal adhesion	77	2.11364	1.0272e-14	MYLK2, ITGB5, FLT4, TNC, ILK, ACTB, MYLK, ACTG1, COMP, CCND2, TNN, KDR, CAPN2, TNR, ITGB7, ITGB6, PDGFRB, PDGFRA, MAP2K1, COL27A1, ITGA3, HGF, ITGA2, ACTN1, ITGA1, ACTN4, VAV1, COL2A1, MYL7, COL4A2, COL4A1, COL6A2, COL6A1, COL6A4, ITGA8, ITGA7, COL6A3, TLN2, TLN1, PPP1R12B, MET, MYL9, BIRC2, VCL, BIRC3, LAMA5, ROCK1, LAMA1, LAMA3, PIK3R3, PIK3R1, THBS2, THBS1, MYL12A, EGFR, PIK3R5, PAK1, RELN, PD…	1170	207	7691	2.44522	2.89102e-12	2.88642e-12	2.28037e-12
GOTERM_CC_DIRECT	GO:0005887~integral component of plasma membrane	255	6.99973	1.2301e-14	OXTR, AQP9, ICAM2, MRGPRF, AQP5, SLC4A2, ZDHHC2, ICAM1, RXFP3, HTR6, HTR7, ALCAM, GJA5, BSG, KDR, EPHB2, EPHB1, IFITM5, EPHB3, EPHA7, KCNK13, SLC5A7, BCAM, TFR2, EPHA1, PLPP3, EPHA3, PLPP1, SLC22A4, PTGFR, PCDH10, SLC22A2, SLCO5A1, LPAR4, SLC5A3, FLRT2, FLRT3, SYNDIG1, SLC19A3, KCNMB4, TSPAN2, SLC19A1, ABCA1, NGFR, GPR17, CADM3, SLC10A6, CADM4, CADM1, CADM2, ABCA4, SLC16A12, SLC6A5, SLC6A6, SLC6A…	2814	1126	19662	1.58236	1.00313e-11	1.11256e-12	1.03875e-12
GOTERM_MF_DIRECT	GO:0003779~actin binding	105	2.88224	2.27466e-14	FHOD3, FHOD1, KLHL33, ESPN, MYLK, MPRIP, DAG1, PLS3, TNS4, SYNPO, TNS1, LIMCH1, ACTN1, TPM2, TPM1, ACTN4, ARC, DAAM2, FSCN1, S100A4, TLN2, UTRN, EZR, TLN1, VCL, SPTBN4, CORO1A, CNN3, SPTA1, CNN2, CNN1, SNTG1, MICAL1, MYH14, MYH11, MYH10, MYH7B, NEBL, HOMER2, MICAL3, MICAL2, DSTN, ARPC4, PARVA, ARPC5, PARVB, SPIRE2, HIP1, WDR1, LMOD1, FHL3, FMN2, TMSB4X, CCR5, SNTA1, CAP1, TRPC6, COBL, SHROOM3, PA…	2559	338	17446	2.11786	4.08079e-11	2.03923e-11	1.99715e-11
GOTERM_CC_DIRECT	GO:0005737~cytoplasm	1127	30.936	2.44217e-14	PID1, POP7, RBPJ, MYLK, ZC3H12D, ZFYVE28, ENDOU, MPRIP, FAM110C, ZC3H12A, FAM19A2, ATG3, GBP5, RBFOX1, MEF2C, PRKAB2, CXADR, EML1, EML2, EML4, RUFY1, METTL7A1, EID3, TFR2, DDIT4, PSME1, PSME2, TXNIP, NGEF, LXN, CRABP2, SHMT2, ABCB4, CRABP1, ZC3HAV1, IQGAP1, PLA2G7, RNF213, CYB5R3, RDH10, PRKAR2A, PDGFC, SFN, PIP5K1C, PPARGC1A, HEXIM1, NGFR, JUP, CADM2, NEBL, PMM2, FAM111A, MOV10, TDP2, PKIA, FASN…	2814	6631	19662	1.18754	1.98819e-11	1.98792e-12	1.85605e-12
GOTERM_BP_DIRECT	GO:0030335~positive regulation of cell migration	71	1.94894	7.99492e-13	SEMA5B, TNFAIP6, ATP8A1, IRS1, ILK, CX3CL1, CXCL16, MYLK, PLAU, FAM110C, KDR, JAK2, SEMA6B, PDGFRB, PDGFRA, SUN2, MAP2K1, ABCC1, HGF, SPHK1, F2R, MMP3, ACTN4, MMP14, CDH13, EPHA1, CSF1R, CD274, LRRC15, SEMA7A, CEMIP, CCL11, SEMA3C, SEMA3D, SEMA3G, CXCR4, PIK3R1, CORO1A, THBS1, AIF1, EGFR, PAK1, WNT11, MIEN1, PTPRZ1, PDPN, NTF3, PDGFC, S1PR1, CCL3, PTK2B, DRD1, CCR1, SEMA4A, TGFB2, SEMA4D, FOXF1, …	2634	203	18082	2.401	5.03747e-09	8.39466e-10	8.15348e-10
GOTERM_CC_DIRECT	GO:0005886~plasma membrane	846	23.2226	4.7019e-12	CHIC2, PREX2, HTR6, HTR7, LIPH, ZC3H12A, WLS, CXADR, UNC5B, UNC5C, SLC5A7, TFR2, TTYH1, ABCB4, SLCO5A1, IQGAP1, THY1, LY9, PRKAR2A, PDGFC, SYNDIG1, KCNE1L, PIP5K1C, PRRT1, ABCA1, GPR17, NGFR, CADM3, JAG1, JUP, CADM1, CADM2, NETO2, GRIN2D, VANGL2, FASN, NOSTRIN, FAT1, NOX4, DCHS1, FAT3, FAT4, ACHE, KCNC2, ARHGAP1, PTH1R, SMPD3, JPH2, OLFR920, MMP24, JPH3, OLR1, DLGAP1, GPR35, KCND3, SPHK1, MYOF, E…	2814	4874	19662	1.2128	3.82735e-09	3.47941e-10	3.24859e-10
GOTERM_BP_DIRECT	GO:0030198~extracellular matrix organization	47	1.29015	1.47579e-11	VIT, LAMA5, OLFML2B, ECM2, LAMA1, ELN, LAMA3, NTN4, NDNF, TNFRSF11B, FBLN1, OLFML2A, NID2, FBLN5, COL19A1, ERO1L, COMP, SPOCK2, ABI3BP, ADAMTSL2, TNR, MPZL3, PDGFRA, POSTN, TGFB2, COL27A1, LAMB3, FOXF2, LAMB2, FOXF1, FN1, LAMB1, KAZALD1, MMP9, AGT, NFKB2, CCDC80, COL4A2, COL4A1, CRISPLD2, SMOC1, BCL3, PXDN, COL6A4, ITGA8, HPSE, TGFBI	2634	114	18082	2.83024	9.299e-08	1.32821e-08	1.29005e-08
GOTERM_CC_DIRECT	GO:0030018~Z disc	49	1.34505	1.67945e-11	FHOD3, RYR1, RYR2, SYNM, FHL2, HSPB1, FHL3, LDB3, PPP3CA, JPH2, MYO18B, PDE4B, PGM5, SYNPO, ACTN1, ANXA5, ACTN4, PALLD, MYOT, SCN8A, CASQ2, PPP1R12B, SYNC, CRYAB, MYL9, VCL, SYNPO2, NEXN, KCNA5, CACNA1C, FBXL22, MYL12A, PAK1, PDLIM3, BAG3, DMD, SCN3B, PDLIM5, SPHKAP, JUP, NEBL, AHNAK2, ATP2B4, NEB, SORBS2, PARVA, PARVB, KRT19, DES	2814	124	19662	2.76107	1.36707e-08	1.13923e-09	1.06365e-09
GOTERM_CC_DIRECT	GO:0045121~membrane raft	80	2.19599	2.8156e-11	SLC2A1, ICAM1, GJA1, EDNRB, GJA3, SGCA, BSG, KDR, CAPN2, DAG1, OLR1, TNR, JAK2, PTRF, EPHB1, CXADR, ANXA2, TRPC4, UNC5B, DCC, TRPC1, NFAM1, ITGA1, RTN4RL2, CYS1, PLSCR1, GPRC5B, RTN4RL1, LCK, BTK, ADAM1A, CD48, TLR6, EZR, BIRC2, H2-D1, BIRC3, TLR2, AHNAK, SDC4, ABCB4, KCNA3, KCNA5, LRP2, ADCY1, IQGAP1, THY1, DLL1, EGFR, ADCY5, DPP4, EFNB1, ADGRG1, INPP5D, PGK1, STOM, PTK2B, DMD, CD14, GPM6B, CD55…	2814	262	19662	2.1335	2.29189e-08	1.763e-09	1.64604e-09
KEGG_PATHWAY	mmu05200:Pathways in cancer	110	3.01949	5.73601e-11	SPI1, CSF3R, FGF2, FGF5, FGF7, EDNRB, FGF9, MYC, PDGFRB, PDGFRA, MAP2K1, DAPK1, HGF, F2R, MITF, COL4A2, COL4A1, CSF1R, TCF7, PIK3R3, PIK3R1, LPAR4, HIF1A, RASGRP1, RASGRP3, PIK3R5, PLCG2, ABL1, WNT2, WNT4, FZD1, STAT5A, FZD3, TGFB2, JUN, FZD2, FZD5, JUP, TGFB3, PTCH1, PTCH2, FZD6, FN1, IGF1, NFKB2, NFKBIA, BMP4, IL6, BMP2, FGF14, KITL, FGF18, GNB5, FGF13, FGFR2, SLC2A1, GLI2, MECOM, BDKRB2, BDKRB…	1170	395	7691	1.8306	1.60608e-08	8.05909e-09	6.36697e-09
GOTERM_CC_DIRECT	GO:0015629~actin cytoskeleton	66	1.81169	5.93149e-11	WDR1, HSPB7, FHL2, KLHL33, FMN2, PPP1R9A, ESPN, ACTG1, CATIP, MPRIP, CSRP1, SYNPO, SLC16A3, DAPK1, DDX58, TNNC1, PAWR, ACTN4, SRCIN1, MTSS1, ACTA2, ACTA1, ARC, PALLD, PEAK1, FSCN1, MYH9, LCP1, PPP1R12B, EZR, VCL, RAI14, MTAP7D3, NOTCH3, AHNAK, SYNPO2, PDXP, IQGAP1, CORO1A, FAM129B, CNN3, PDLIM3, ABLIM1, PDLIM2, ABLIM2, ABL1, ZFP185, FLNA, PDLIM5, MYH10, IVNS1ABP, SVIL, GSN, JUP, NFATC2, DSTN, ARP…	2814	201	19662	2.29431	4.82823e-08	3.40335e-09	3.17757e-09
GOTERM_CC_DIRECT	GO:0001725~stress fiber	33	0.905847	6.27152e-11	FHOD1, ILK, FHL3, MST1R, MYL12A, ACTB, MYLK, CNN2, ABLIM1, PDLIM2, MPRIP, MYH14, MYH11, PGM5, SYNPO, MYH10, ANXA2, NEBL, ACTN1, TPM1, ACTN4, SORBS1, ACTA1, MLPH, VANGL2, PALLD, FSCN1, MYH9, NOX4, ROR1, LCP1, MYL9, VCL	2814	67	19662	3.44146	5.10501e-08	3.40335e-09	3.17757e-09
GOTERM_BP_DIRECT	GO:0001666~response to hypoxia	64	1.75679	1.20967e-10	ACVRL1, RYR1, RYR2, ADM, ABAT, PLAT, HIF3A, NPPB, PLAU, KDR, CAPN2, CASP1, CD38, CAR9, POSTN, MYOCD, ITGA2, ACTN4, ATP1B1, AGTR1B, TGFBR3, MMP14, KCNMA1, DDIT4, ANGPTL4, CRYAB, BIRC2, TLR2, ND4, SRF, CXCR4, KCNA5, HIF1A, ASCL2, CYGB, APOLD1, DPP4, PDLIM1, PAK1, PENK, UCP2, PTK2B, CCL2, CAMK2G, EGLN3, TGFB2, VCAM1, ANGPT2, NOS2, TGFB3, BNIP3, CAV1, VEGFC, VEGFD, WTIP, SOD2, SOD3, VEGFA, NR4A2, BMP…	2634	192	18082	2.28828	7.62211e-07	9.52612e-08	9.25244e-08
KEGG_PATHWAY	mmu04512:ECM-receptor interaction	39	1.07055	2.37672e-10	LAMA5, ITGB5, SDC4, LAMA1, LAMA3, TNC, THBS2, THBS1, COMP, RELN, TNN, SPP1, DAG1, TNR, ITGB7, ITGB6, COL27A1, LAMB3, COL24A1, LAMB2, ITGA3, ITGA2, ITGA1, FN1, LAMB1, COL3A1, COL2A1, COL4A2, COL5A1, COL4A1, COL6A2, COL6A1, ITGA11, COL6A4, ITGA8, ITGA7, COL6A3, CD47, AGRN	1170	88	7691	2.91326	6.65481e-08	2.22619e-08	1.75877e-08
GOTERM_MF_DIRECT	GO:0005102~receptor binding	109	2.99204	4.44691e-10	CNTFR, TRAF3IP2, HFE, CTNND1, H2-K1, PLAT, ABCA12, FGF2, FGF5, GJA1, FGF7, FGF9, EPHB2, PDGFRB, F2R, MIF, EML2, STX1B, MAG, TYROBP, ACOT4, H2-D1, NXPH3, NXPH4, H2-M3, H2-M1, PIK3R1, MCHR1, DPP4, SLC9A3R2, PRDX5, DRD1, WNT2, WNT4, FZD1, ABCA1, TGFB2, CADM3, CADM4, CADM1, TNFSF14, CADM2, EPHX2, CAV1, RARRES2, LIF, NSG1, INHBA, PTPRD, IL6, BMP2, FGF14, ARTN, FGF18, TNFSF9, OSTN, FGF13, CD200, H2-T23…	2559	412	17446	1.80366	7.9733e-07	2.22579e-07	2.17986e-07
GOTERM_MF_DIRECT	GO:0051015~actin filament binding	49	1.34505	4.96552e-10	HIP1, WDR1, PPP1R9A, ESPN, SYNE3, PLS3, ANXA8, ACTN1, TNNC1, TPM1, SHROOM3, ACTN4, SPTB, MTSS1, MYL4, CACNB2, FSCN1, MYH9, LCP1, TLN2, TLN1, UTRN, EZR, VCL, GAS7, NEXN, CORO1A, AIF1, EGFR, SSFA2, ABL1, MYH14, FLNA, EPS8L1, EPS8L2, MYH10, CTNNAL1, SVIL, MYO10, HIP1R, DSTN, ARPC4, ARPC5, MYO1D, MYO1E, FMNL1, MYO1B, MYO1C, CORO6	2559	132	17446	2.53074	8.90317e-07	2.22579e-07	2.17986e-07
GOTERM_BP_DIRECT	GO:0035458~cellular response to interferon-beta	24	0.658798	7.25615e-10	GBP6, TGTP2, PNPT1, IFI204, IFI205, STAT1, TREX1, IFI203, IRGM2, ACOD1, IFI47, IFIT1, IFIT3, IIGP1, GM12185, TRIM6, F830016B08RIK, IRF1, IGTP, GM4951, GM4841, GBP2, TLR3, GBP3	2634	41	18082	4.01845	4.57209e-06	4.92533e-07	4.78383e-07
GOTERM_BP_DIRECT	GO:0003151~outflow tract morphogenesis	28	0.768597	7.81799e-10	RYR1, SEMA3C, ILK, RBPJ, THBS1, HIF1A, WNT11, HEY1, GJA5, TBX20, HEY2, HES1, FZD1, JUN, MEF2C, TGFB2, FZD2, EYA1, MSX2, NPY1R, SOX11, TBX3, VEGFA, TGFBR3, BMP4, HEYL, SFRP2, ZFPM2	2634	54	18082	3.55955	4.9261e-06	4.92533e-07	4.78383e-07
GOTERM_CC_DIRECT	GO:0030424~axon	98	2.69009	9.77232e-10	ACTB, C4B, ALCAM, TUBB3, MYC, NRTN, NRCAM, KIF21A, EPHB2, SYNPO, EPHB1, KCNH1, KIRREL3, PDGFRA, MAP2K1, UNC13A, SEMA6A, DSCAM, IL1R1, LMTK3, NPY1R, SRCIN1, OLFM1, SLC5A7, OMP, PGR, SPTBN4, TTYH1, NTM, SLC1A2, IQGAP1, CORO1A, SPTA1, PENK, MYH14, DRD1, MYH10, DRD4, DRD5, FZD3, TGFB2, CADM1, CADM2, PDE2A, TRPV2, CNTN2, FGF13, NRP1, ACHE, CNTNAP1, KCNC2, GRIK4, ILK, HSPB1, PTPRK, HTR2A, GRIK2, PCLO, …	2814	370	19662	1.85067	7.95467e-07	4.97167e-08	4.64185e-08
GOTERM_BP_DIRECT	GO:0006915~apoptotic process	137	3.76064	1.56414e-09	STEAP3, 1810011O10RIK, GPR65, JADE1, GHITM, ERO1L, PYCARD, COMP, GJA1, FAM162A, PEG10, RASSF6, ZC3H12A, PIM1, PIM3, MAP3K8, MAP3K9, CHAC1, TNS4, PHLDA1, PHLDA3, EPHA7, SPINK2, MEF2C, SEMA6A, DAPK1, UNC5B, SP110, DIO3, UNC5C, EDAR, ERN1, NAIP2, SFRP2, MADD, DDIT4, BTK, TRIB3, PRKD1, PSMD10, C5AR1, ECSCR, ADRB1, TNFRSF11B, ZFP36L1, BCL2L11, BAG3, INPP5D, ABL1, PMAIP1, MAP2K6, PEA15A, NGFR, CADM1, G…	2634	570	18082	1.64997	9.85563e-06	8.95828e-07	8.70091e-07
GOTERM_CC_DIRECT	GO:0030054~cell junction	162	4.44688	1.75073e-09	CHRM5, ESPN, RIMS2, C4B, GJA1, GJA3, GJA5, NAMPT, DAG1, KDR, HMCN1, TNS4, SYNPO, BVES, MAGI1, UNC13A, CXADR, DSCAM, ACTN1, KAZN, UNC5C, ACTN4, SRCIN1, OLFM1, ARC, OLFM2, BIN2, 4930486L24RIK, FSCN1, PKP1, NSMF, PKP4, KCTD12, TLN2, TLN1, VCL, NRN1, CHRNA2, PPL, DPP4, FLRT2, FLRT3, CLCA2, SYNDIG1, LPXN, ZFP185, PIP5K1C, PRRT1, CADM3, JUP, CADM1, HOMER2, CADM2, ARHGAP28, PARVA, PARVB, ARHGAP24, SYT7,…	2814	718	19662	1.5765	1.42509e-06	8.38291e-08	7.82679e-08
GOTERM_MF_DIRECT	GO:0005178~integrin binding	40	1.098	2.03327e-09	LAMA5, SEMA7A, ITGB5, ICAM2, ILK, THY1, THBS1, WISP1, FBLN5, EGFR, CX3CL1, WISP2, ICAM1, TNN, KDR, TIMP2, TNR, S1PR3, ITGB6, EDIL3, VCAM1, CXADR, LAMB2, ITGA3, ITGA2, ACTN1, FN1, LAMB1, GFRA1, IGF1, COL3A1, MMP14, NOV, ITGA7, CD9, TGFBI, TLN1, PLPP3, UTRN, PTPN2	2559	100	17446	2.727	3.64564e-06	7.2913e-07	7.14083e-07
GOTERM_BP_DIRECT	GO:0009612~response to mechanical stimulus	30	0.823497	2.21071e-09	TNC, KCNA5, THBS1, GLI2, PIEZO2, CCL2, PTK2B, BDKRB1, SOST, ASIC3, JUNB, PSPH, POSTN, JUN, ANGPT2, STAT1, PTCH1, CAV1, IGFBP2, ASNS, INHBB, DCN, FOSL1, ACTA1, COL3A1, MMP14, P2RX3, LCK, TXNIP, PPARG	2634	63	18082	3.26897	1.39296e-05	1.08756e-06	1.05632e-06
GOTERM_BP_DIRECT	GO:0045087~innate immune response	104	2.85479	2.24418e-09	IFITM3, IFITM1, NRROS, IFITM2, CLEC4N, PRDM1, IFIT1, IFIT3, PYCARD, C4B, C1S2, C1S1, DHX58, TRIM25, TRIM21, B2M, HERC6, FBXO9, ZBP1, RSAD2, SP110, CD180, CYBB, ACOD1, MIF, MID2, NAIP2, TYROBP, BTK, SERPING1, TRIM14, SH2D1B1, PRKD1, CLEC4E, CFB, C4BP, CSF1R, ZBTB1, MST1R, ZC3HAV1, LY9, C2, C3, CLEC7A, ABL1, SLAMF7, CD14, GSDMD, LY86, SSC5D, IIGP1, NFKB2, BST2, LCN2, IL1F9, ADAR, TREM2, JCHAIN, IFI…	2634	400	18082	1.78486	1.41405e-05	1.08756e-06	1.05632e-06
GOTERM_BP_DIRECT	GO:0071526~semaphorin-plexin signaling pathway	21	0.576448	3.03121e-09	SEMA5A, SEMA6B, FARP2, SEMA5B, NRP1, SEMA4A, SEMA6A, SEMA4D, SEMA3C, SEMA3D, SEMA4C, SEMA3G, CRMP1, SEMA4F, SEMA4G, PLXNB3, PLXNA2, FLNA, PLXNC1, MET, PLXNA4	2634	34	18082	4.24005	1.90995e-05	1.29951e-06	1.26218e-06
GOTERM_BP_DIRECT	GO:0032496~response to lipopolysaccharide	62	1.70189	3.09408e-09	CXCL9, CD40, ADM, PTPN22, CXCL1, CXCL3, CXCL2, CXCL5, NPPB, RPS6KA3, THBD, TRIM6, EDNRB, CASP1, BDKRB1, ACP5, LBP, JAK2, JUNB, PTGIR, UGT1A1, F2R, ACOD1, IRAK3, FOS, DCN, FOXP1, TNFRSF21, TLR2, PTGES, IFNAR1, PTGFR, CEBPB, PTGER1, PTGER2, C5AR1, TNFRSF11B, TNFRSF11A, NOD2, PTGS2, CYP27B1, CNR2, TBXA2R, PENK, PLCG2, TNFRSF14, PCK2, NGFR, JUN, ACE, VCAM1, GCH1, NOS2, STAT1, TNFRSF9, FMO1, SOD2, NFK…	2634	197	18082	2.16051	1.94956e-05	1.29951e-06	1.26218e-06
GOTERM_MF_DIRECT	GO:0042803~protein homodimerization activity	178	4.88608	4.01808e-09	CDA, UGT1A10, OLFML2B, PRDM6, HP, ABAT, OLFML2A, IKZF4, PYCARD, HPGDS, SPATA24, NAMPT, PSPH, GAMT, PDGFRA, UNC13A, DGAT2, ACTN1, COL23A1, TPM1, ACSL6, TAP1, MTUS2, ACTN4, FOXP4, FOXP3, MID1, MID2, FOXP2, FOXP1, ERN1, MAF, CHMP4C, S100A6, NBL1, ABCG1, TRIM12C, CSF1R, NRN1, PEX11A, H2-M3, NPR3, ZBTB1, ABCB9, CORO1A, RASGRP1, FBLN5, DPP4, FLRT3, IRAK2, STC2, PRKAR2A, NACC2, PDGFC, SYNDIG1, FZD1, NGF…	2559	798	17446	1.5207	7.20439e-06	1.20074e-06	1.17596e-06
GOTERM_CC_DIRECT	GO:0043025~neuronal cell body	127	3.48614	4.57972e-09	MYLK2, PYCARD, C4B, ALCAM, HTR7, TUBB3, KDR, EPHB2, KCNH1, EPHA7, CYBB, ACSL4, SRCIN1, OLFM1, SLC5A7, OMP, SCN8A, IL6ST, FKBP4, SPTBN4, PDE1C, PDE1A, ITPR3, CACNA1C, SEZ6L2, LTBP1, RTN4, CNN3, DPP6, MAP2, GRK4, PENK, ABL1, DRD1, KCNN3, MYH10, PPARGC1A, DRD4, DRD5, CCR1, FZD3, TGFB2, TGFB3, HOMER2, PMM2, SLC4A10, NR1D1, IGF1, SYT7, GRIN3A, CNTN2, STRN, IGSF9B, OGT, ADA, ACVRL1, NRP1, ACHE, CD40, K…	2814	534	19662	1.66175	3.72788e-06	2.07105e-07	1.93366e-07
GOTERM_CC_DIRECT	GO:0005604~basement membrane	38	1.0431	5.48729e-09	LAMA5, COL15A1, LAMA1, LAMA3, TNC, NTN4, TRF, FBLN1, THBS2, NID2, ACAN, FGF9, DAG1, TIMP2, TIMP3, HMCN1, TIMP1, COL28A1, TGFB2, LAMB3, ANXA2, LAMB2, P3H2, FN1, LAMB1, VEGFA, COL2A1, FRAS1, CCDC80, COL4A2, COL5A1, COL4A1, SMOC1, COL8A2, COL8A1, TGFBI, AGRN, FREM2	2814	97	19662	2.73726	4.46665e-06	2.35087e-07	2.19492e-07
GOTERM_CC_DIRECT	GO:0042383~sarcolemma	43	1.18035	5.98854e-09	POPDC2, RYR1, RYR2, SYNM, AHNAK, DYSF, ATP1A3, AKAP6, ATP1A2, CACNA1C, CACNA1H, ADCY5, PPP3CA, SGCA, BSG, DAG1, DMD, PGM5, BVES, SNTA1, ANXA1, VCAM1, ANXA2, KCND3, KCNB1, ANXA5, ATP2B4, ABCC9, ATP1B1, KRT19, DES, MYOT, COL6A2, COL6A1, SSPN, ITGA7, FAS, COL6A3, CASQ1, UTRN, AGRN, SYNC, VCL	2814	118	19662	2.54619	4.87466e-06	2.43734e-07	2.27565e-07
GOTERM_BP_DIRECT	GO:0007411~axon guidance	50	1.3725	1.24499e-08	SEMA5A, NRP1, DRAXIN, PTPRO, GLI2, ALCAM, TUBB3, CHL1, NRCAM, EPHB2, NEO1, EPHB1, SCN1B, EPHB3, SEMA6A, FOXD1, UNC5B, DCC, ETV1, UNC5C, GFRA3, MAPK8IP3, CSF1R, SEMA3C, LAMA1, DLX5, CRMP1, EFNB1, ABLIM1, RELN, FLRT2, FLRT3, NTF3, SLIT1, MYH10, PLXNA4, NGFR, TGFB2, LAMB2, SEMA4F, LAMB1, GDF7, EFNA1, NFASC, NR4A3, KIF26A, ARTN, KIF26B, CNTN2, CNTN4	2634	149	18082	2.30364	7.84435e-05	4.90213e-06	4.76129e-06
KEGG_PATHWAY	mmu04151:PI3K-Akt signaling pathway	94	2.58029	1.51435e-08	CSF3R, ITGB5, IRS1, FLT4, TNC, FGF2, COMP, FGF5, FGF7, CCND2, FGF9, TNN, MYC, KDR, TNR, ITGB7, ITGB6, JAK2, PDGFRB, IFNAR2, PDGFRA, MAP2K1, COL27A1, ITGA3, HGF, ITGA2, ITGA1, F2R, NGF, OSMR, CREB3, COL2A1, COL4A2, COL4A1, COL6A2, COL6A1, DDIT4, COL6A4, ITGA8, ITGA7, COL6A3, SGK1, MET, TLR2, IFNAR1, LAMA5, CSF1R, LAMA1, LAMA3, IL4RA, PIK3R3, IL6RA, PIK3R1, LPAR4, IL2RG, THBS2, THBS1, EGFR, PIK3R5,…	1170	351	7691	1.76043	4.24017e-06	1.06383e-06	8.40464e-07
GOTERM_BP_DIRECT	GO:0007275~multicellular organism development	215	5.90173	1.61319e-08	SCX, GLDN, SOX2, RNF114, ANPEP, SPATA24, INSC, ZC3H12A, KDR, CDK20, TNFSF11, EPHB2, HOXA7, SOX6, BVES, IFITM5, EPHB3, HOXA4, WLS, PAQR8, CCBE1, EPHA7, MEF2C, UNC5B, IFRD1, SOX11, UNC5C, EBF4, DKK2, EREG, DKK3, SFRP4, ARC, SFRP1, SFRP2, SIK1, PLPP3, NGEF, FREM2, GGNBP1, CASZ1, HACD1, FLRT2, FLRT3, DND1, PDGFC, HIVEP1, HIVEP2, HOXC8, FZD1, NGFR, FZD3, JAG1, FZD2, FZD5, CADM1, GADD45B, FZD6, GDF6, D…	2634	1029	18082	1.43435	0.000101642	5.97831e-06	5.80655e-06
GOTERM_BP_DIRECT	GO:0045669~positive regulation of osteoblast differentiation	30	0.823497	1.89817e-08	CEBPA, CEBPB, IFITM1, CEBPD, DLX5, ILK, GDPD2, FGF2, SCUBE2, GJA1, HEY1, LMNA, WNT4, CTHRC1, GDF10, MEF2C, JAG1, IFI204, MSX2, SOX11, IGF1, BMP6, VEGFA, BMP4, BMP2, SFRP2, TMEM119, ID4, PRKD1, IL6ST	2634	68	18082	3.02861	0.000119596	6.64358e-06	6.45271e-06
GOTERM_BP_DIRECT	GO:0009615~response to virus	34	0.933297	2.37817e-08	IFITM3, IFITM1, IFITM2, OAS1A, HSPB1, OAS1B, ADAR, MST1R, ZC3HAV1, DDX60, IFIT1, IFIT3, IFIH1, DHX58, HYAL3, OASL1, OASL2, TGTP2, MEF2C, RSAD2, DDX58, MX2, IRAK3, FOXP3, DCLK1, ACTA2, BST2, OAS2, OAS3, BCL3, LCN2, IFI27L2A, TLR3, TLR13	2634	84	18082	2.77863	0.000149837	7.88552e-06	7.65897e-06
GOTERM_BP_DIRECT	GO:0050731~positive regulation of peptidyl-tyrosine phosphorylation	38	1.0431	3.11546e-08	NRP1, LRRK1, IL6RA, TREM2, HTR2A, NOD2, ICAM1, FGF7, RELN, PTPRZ1, NTF3, ABL1, ENPP2, PTK2B, TNFRSF14, JAK2, ANGPT4, CD74, PDGFRA, SEMA4D, ANGPT1, HGF, OSM, LIF, VEGFC, IGF1, MIF, AGT, VEGFA, EFNA1, IL6, TEC, EHD4, KITL, CSPG4, SH2D1B1, PLPP3, AGRN	2634	101	18082	2.58281	0.000196286	9.81369e-06	9.53174e-06
GOTERM_BP_DIRECT	GO:0006955~immune response	75	2.05874	3.61321e-08	CXCL9, MCPT8, TINAGL1, EDA, NRROS, LST1, H2-K1, CXCL1, CXCL3, CXCL2, CXCL5, CX3CL1, TNFSF13B, ENDOU, FTH1, ENPP2, TNFSF11, SH2D6, CCR5, B2M, OASL1, OASL2, TGTP2, SERPINB9, VAV1, TGFBR3, PLSCR1, OAS2, OAS3, TLR6, CLEC4E, H2-D1, TLR2, CD274, CCL11, WAS, OAS1B, TNFRSF11B, TNFRSF11A, OAS1C, THBS1, OAS1G, CCL9, CCL8, CCL7, CCL6, CCL4, CCL3, CCL2, CCL17, CCR1, NGFR, CD74, TNFSF14, TNFSF15, ZFR2, TNFRSF…	2634	272	18082	1.89288	0.000227643	1.08396e-05	1.05282e-05
GOTERM_CC_DIRECT	GO:0005581~collagen trimer	33	0.905847	4.30913e-08	C1QB, C1QA, COL15A1, COLEC10, EDA, COL14A1, COL12A1, COL19A1, GLDN, C1QTNF3, C1QTNF1, C1QTNF5, COL10A1, CTHRC1, COL28A1, CCBE1, COL27A1, COL24A1, COL23A1, C1QL3, COLQ, COL3A1, COL2A1, COL4A2, COL5A1, COL4A1, COL6A2, COL6A1, COL6A4, COL8A2, COL6A3, COL8A1, C1QC	2814	83	19662	2.77805	3.50757e-05	1.6703e-06	1.5595e-06
GOTERM_MF_DIRECT	GO:0008083~growth factor activity	48	1.3176	5.01584e-08	CDNF, CXCL1, FGF2, WISP2, FGF5, FGF7, PRL2C3, FGF9, NTF3, PDGFC, NRTN, TIMP1, PRL2C2, GDF10, TGFB2, GDF15, TGFB3, HGF, IL34, CLEC11A, OSM, LIF, VEGFC, INHBB, VEGFD, IGF1, INHBA, GDF3, NGF, GDF6, BMP6, BMP5, VEGFA, GDF7, EREG, BMP4, BTC, BMP3, IL6, BMP2, FGF14, NOV, GDNF, IL7, KITL, ARTN, FGF18, FGF13	2559	145	17446	2.25683	8.993e-05	1.28477e-05	1.25826e-05
GOTERM_BP_DIRECT	GO:0070374~positive regulation of ERK1 and ERK2 cascade	57	1.56464	6.05855e-08	NRP1, FLT4, PTPN22, TREM2, HTR2A, FGF2, CX3CL1, ICAM1, PYCARD, C1QTNF3, BMPER, FAM150A, KDR, PDGFRB, PDGFRA, MAP2K1, DCC, F2R, MIF, GAS6, TLR2, CSF1R, SEMA7A, NDRG4, CCL11, C5AR1, NOD1, NOD2, RASGRP1, EGFR, C3, CCL9, CCL8, CCL7, CCL6, CCL4, PDGFC, CCL3, ABL1, PRKCDBP, PTK2B, CCL2, CCL17, CCR1, CD74, JUN, ANGPT1, VEGFA, BMP4, IL6, BMP2, GPR183, FGF18, SPRY2, NOX4, ACKR3, FGFR2	2634	188	18082	2.08136	0.000381676	1.73495e-05	1.6851e-05
GOTERM_BP_DIRECT	GO:0010628~positive regulation of gene expression	99	2.71754	6.94978e-08	MYLK2, PID1, HFE, TNC, SCX, PRDM1, RBPJ, FGF2, ACTG2, RIMS2, GJA1, CDH3, FGF9, ZC3H12A, SOX8, MAP2K1, MEF2C, SOX11, MITF, FOXP3, EDAR, OLFM1, SFRP4, MYCN, MAF, EZR, PTGFR, PIK3R1, HIF1A, CNN2, MUSTN1, SEC16B, TGFB2, TGFB3, BCL11A, EPHX2, CAV1, PDE2A, FN1, LIF, NFATC2, RAB27A, INHBA, GDF7, BMP4, IL6, BMP2, RGCC, ID1, ID4, LCN2, CD28, MKX, OGT, FGFR2, EDA, PTPN22, EPB41L4B, PPP3CA, TRIM6, C1QTNF1, …	2634	399	18082	1.70331	0.00043781	1.90363e-05	1.84894e-05
GOTERM_CC_DIRECT	GO:0005856~cytoskeleton	222	6.09388	1.12372e-07	FRMPD3, CCP110, ACTB, MYLK, CDC20, PNP, RASSF3, MPRIP, FAM110C, ZC3H12A, DZIP1L, DAG1, KIF21A, KIF21B, TNS4, SYNPO, CCDC92, ACTN1, MTUS2, EML1, EML2, EML4, ARC, NSMF, TTLL11, TLN2, EZR, TLN1, TRIB2, WDR62, PPL, MAP2, MICAL1, INPP5D, ZFP185, MAP6, JUP, DNAH17, RCC2, RAB3IP, MICAL3, PARVA, PARVB, SMTN, KITL, NOSTRIN, MYOM1, WDR47, SYNM, TGFB1I1, SNX10, FMN2, SLC7A11, AKAP12, EPB41L4B, TUBA1A, CATIP…	2814	1113	19662	1.39367	9.14668e-05	4.15777e-06	3.88195e-06
GOTERM_CC_DIRECT	GO:0043034~costamere	14	0.384299	1.19149e-07	SVIL, SYNM, SDC4, AHNAK, TRPC1, AHNAK2, ILK, ACTG1, KRT19, CMYA5, DAG1, PGM5, DMD, VCL	2814	19	19662	5.14847	9.69827e-05	4.21684e-06	3.9371e-06
GOTERM_MF_DIRECT	GO:0005516~calmodulin binding	55	1.50974	1.49599e-07	RYR1, MYLK2, RYR2, MYLK, PPP3CA, SNTA1, KCNH1, IQCB1, UNC13A, PCYT1A, DAPK1, SPHK1, TRPC2, ENKUR, MYH1, MYH9, PDE1C, RRAD, PDE1A, CACNA1C, PIK3R1, ADCY1, IQGAP1, AKAP5, ADCY8, EGFR, CNN3, CNN2, REM1, CNN1, MAP2, MYH14, MAP6, MYH11, KCNN3, MYH10, CAMK2G, MARCKSL1, NOS2, MYO10, ATP2B4, ESRRG, SYT7, MYO1D, CAMSAP3, MYO1E, MYO1B, MYO1C, CAMK4, CTH, MAP6D1, STRN, FBXL2, MYO1F, MYO1G	2559	182	17446	2.06024	0.000268196	3.35289e-05	3.28371e-05
GOTERM_BP_DIRECT	GO:0042060~wound healing	35	0.960747	1.59252e-07	SDC4, TNC, ADRB1, CXCL2, FGF2, EGFR, CX3CL1, CNN2, EPB41L4B, FGF7, PAK1, CDH3, PLAU, MUSTN1, TIMP1, DRD5, PDGFRB, PDGFRA, TGFB2, SERPINB2, MSX2, TGFB3, ITGA2, CAV1, TPM1, FN1, DCN, DCBLD2, MMP12, IL6, COL3A1, VANGL2, FCGR4, EPPK1, HPSE	2634	94	18082	2.55606	0.00100294	4.18036e-05	4.06026e-05
GOTERM_MF_DIRECT	GO:0005509~calcium ion binding	153	4.19984	1.89334e-07	DGKG, CLSTN2, GUCA1B, GUCA1A, CELSR3, CDH6, COMP, HPGDS, C1S2, CDH3, C1S1, CAPN2, DAG1, ENPP2, PLS3, HMCN1, PAMR1, PSPH, CCBE1, CD93, ACTN1, ACTN4, SYTL5, 1700109H08RIK, MYL4, MYL6, MYL7, S100A6, SPARCL1, S100A4, S100A3, PPEF1, MYL9, FBLN7, NOTCH3, PCDH10, TTYH1, PROZ, FBLN1, ITPR3, C2CD4C, NID2, LTBP1, RASGRP1, FBLN5, MYL12A, RASGRP3, SPTA1, SCUBE2, SCUBE3, CDH22, CDH23, CDH24, S100A11, JAG1, MC…	2559	699	17446	1.49224	0.000339418	3.55493e-05	3.48157e-05
GOTERM_MF_DIRECT	GO:0008201~heparin binding	48	1.3176	1.98267e-07	FBLN7, NRP1, LXN, ITGAM, ECM2, NDNF, PRELP, THBS2, PCSK6, THBS1, FGF2, WISP1, WISP2, COMP, ADAMTS5, FGF7, ADGRG1, CCL8, CCL7, FGF9, ADAMTSL5, ABI3BP, LIPH, LIPG, SLIT1, RSPO2, CCL2, RSPO3, SOST, TMEM184A, POSTN, PTCH1, COL23A1, FN1, VEGFA, TGFBR3, SELP, BMP4, GREM2, SFRP1, FGF14, CCDC80, NOV, COL5A1, CRISPLD2, FMOD, FGFR2, PF4	2559	151	17446	2.16715	0.00035543	3.55493e-05	3.48157e-05
GOTERM_BP_DIRECT	GO:0048286~lung alveolus development	23	0.631348	2.09522e-07	ERRFI1, MYOCD, ACE, IGFBP5, TGFB3, FOXF1, FLT4, LIF, TCF21, IGF1, ABCA12, MAPK8IP3, HOPX, FOXP2, VEGFA, SOX2, BMP4, PDPN, KDR, PGR, STK40, FGFR2, ADA	2634	48	18082	3.2894	0.00131933	5.27996e-05	5.12826e-05
KEGG_PATHWAY	mmu04380:Osteoclast differentiation	43	1.18035	2.498e-07	CSF1R, SPI1, FHL2, PIK3R3, TNFRSF11B, TREM2, PIK3R1, TNFRSF11A, PIK3R5, RELB, SOCS3, PPP3CA, SOCS1, PLCG2, ACP5, TNFSF11, JUNB, MAP2K6, IFNAR2, MAP2K1, JUN, TGFB2, STAT1, IL1R1, STAT2, CYBB, NFATC2, MITF, FOS, MAPK13, NFKB2, FOSL1, NFKBIA, TYROBP, TEC, LCK, FCGR4, CAMK4, BTK, PPARG, FCGR2B, IRF9, IFNAR1	1170	126	7691	2.24334	6.99414e-05	1.18859e-05	9.39027e-06
KEGG_PATHWAY	mmu04668:TNF signaling pathway	39	1.07055	2.53791e-07	CEBPB, PIK3R3, TNFAIP3, CXCL1, PIK3R1, NOD2, CXCL3, PTGS2, CXCL2, CX3CL1, PIK3R5, ICAM1, SOCS3, RPS6KA5, CCL2, MAP3K8, JUNB, MAP2K6, MAP2K3, MAP2K1, JUN, VCAM1, MMP3, LIF, IFI47, FOS, TRAF1, MMP9, SELE, MAPK13, NFKBIA, CREB3, IL6, MMP14, TRAF5, BCL3, FAS, BIRC2, BIRC3	1170	109	7691	2.35199	7.1059e-05	1.18859e-05	9.39027e-06
GOTERM_CC_DIRECT	GO:0030425~dendrite	112	3.07439	3.50918e-07	MYLK2, ERO1L, C4B, HTR6, ALCAM, HTR7, TUBB3, CAPN2, KIF21A, KIF21B, EPHB2, SYNPO, EPHB1, EPHB3, KCNH1, KIRREL3, EPHA7, MAP2K1, LMTK3, CYBB, SRCIN1, MAPK8IP3, SLC5A7, SCN8A, FSCN1, NSMF, PGR, IL6ST, ITPR3, CACNA1C, THY1, LTBP1, CACNA1H, CNN3, MAP2, GRK4, PENK, DRD1, DRD4, DRD5, FZD3, CADM1, HOMER2, PDE2A, HTR1D, RAB27A, NR1D1, SYT7, FAT3, IGSF9B, FGF13, ACVRL1, ACHE, KCNC2, AATK, GRIK4, HSPB1, GRI…	2814	490	19662	1.59708	0.000285606	1.1902e-05	1.11124e-05
GOTERM_BP_DIRECT	GO:0045071~negative regulation of viral genome replication	18	0.494098	3.57447e-07	IFITM3, IFITM1, APOBEC3, IFITM2, RSAD2, MX2, A230050P20RIK, ADAR, ISG15, OAS1B, ZC3HAV1, PARP10, BST2, FAM111A, TRIM6, PLSCR1, OAS3, OASL1	2634	32	18082	3.86147	0.00224974	8.66122e-05	8.41239e-05
GOTERM_BP_DIRECT	GO:0042127~regulation of cell proliferation	63	1.72934	3.88165e-07	CXCL9, TNC, PRDM1, CXCL3, RBPJ, CXCL2, CXCL5, MECOM, PLAU, PITX2, JUNB, BRICD5, KCNH1, APOBEC1, ANXA1, PLA2G4A, MITF, MIF, HCK, SFRP2, LCK, TAL1, TRNP1, BTK, TXNIP, SGK1, LAMA5, CEBPA, PTGER2, TCF7, IL4RA, TNFRSF11B, TNFRSF11A, PTGS2, HIF1A, NDRG1, EGFR, PTGS1, CNN2, CHST11, PTK2B, S100A11, EGLN3, TGFB2, JAG1, NOS2, JUP, PTCH1, TNFRSF9, CELA1, PRG4, IGF1, TBX3, NFKBIA, IL6, TEC, BCL6, SPRY2, FAS,…	2634	227	18082	1.90522	0.00244284	9.05718e-05	8.79696e-05
GOTERM_BP_DIRECT	GO:0042981~regulation of apoptotic process	57	1.56464	4.89665e-07	CD40, HIP1, PYCARD, TMEM102, CASP12, RASSF2, RASSF3, MYC, RASSF6, CASP4, CASP1, CASP2, BOK, MSX2, DUSP1, IRAK3, MITF, TRAF1, ACTN4, SFRP2, LCK, MADD, TRAF5, SGK1, BIRC2, TNFRSF21, BIRC3, NLRP1B, TNFRSF11B, NOD1, TNFRSF11A, NOD2, MALT1, BCL2L11, ACVR1C, IRAK2, NTF3, PMAIP1, TNFRSF14, PEA15A, GDF10, TGFB2, GDF15, TNFRSF9, INHBA, GDF3, GDF6, BMP6, AGT, BMP5, GDF7, BMP3, IL6, BMP2, DLG5, BCL3, FAS	2634	199	18082	1.96631	0.00308062	0.000110175	0.000107009
KEGG_PATHWAY	mmu04360:Axon guidance	43	1.18035	5.16921e-07	SEMA5A, SEMA5B, NRP1, SEMA7A, ROCK1, SEMA3C, SEMA3D, NTN4, SEMA3G, CXCR4, RND1, EFNB1, PPP3CA, ABLIM1, PAK1, ABLIM2, SLIT1, ABL1, PLXNA2, PLXNC1, EPHB2, EPHB1, PLXNA4, EPHB3, SEMA6B, SEMA4A, EPHA7, SEMA6A, SEMA4D, UNC5B, DCC, LIMK2, SEMA4C, NFATC2, SEMA4F, UNC5C, SEMA4G, EFNA1, PLXNB3, EPHA1, MET, EPHA3, NGEF	1170	129	7691	2.19117	0.000144727	2.07507e-05	1.63938e-05
GOTERM_CC_DIRECT	GO:0031225~anchored component of membrane	44	1.2078	6.17415e-07	CNTFR, LY6K, ACHE, CPM, SEMA7A, NRN1, NTM, THY1, ART3, ART4, LY6C1, NT5E, CD59A, GPC3, CD14, PRND, GPC6, CD55, CD52, PRNP, LYNX1, VCAM1, NEGR1, RTN4RL2, GFRA1, GFRA3, RGMA, EFNA1, BST2, BST1, RTN4RL1, CD109, MMP17, CDH13, CNTN2, ALPL, CD48, CNTN4, MDGA2, FOLR2, SMPDL3B, FOLR1, SPRN, LY6E	2814	141	19662	2.1804	0.00050245	2.0103e-05	1.87694e-05
GOTERM_BP_DIRECT	GO:0051607~defense response to virus	50	1.3725	6.51691e-07	IFITM3, CXCL9, CD40, IFITM1, IFITM2, A230050P20RIK, ADAR, IFIT1, IFIT3, PYCARD, IFIH1, DHX58, TRIM25, OASL1, OASL2, APOBEC1, ZBP1, IFNAR2, APOBEC3, RSAD2, DDX58, ABCC9, IFIT1BL2, PLSCR1, OAS2, OAS3, IRF1, DDIT4, TLR3, TRIM34A, IFNAR1, SLFN8, NLRC5, OAS1A, OAS1B, ZC3HAV1, OAS1C, DDX60, SLFN9, OAS1G, PMAIP1, IL33, BNIP3, MX2, STAT2, ISG15, BST2, IL6, CD207, IFIT3B	2634	167	18082	2.05534	0.00409789	0.000141574	0.000137507
GOTERM_MF_DIRECT	GO:0005125~cytokine activity	60	1.64699	6.56009e-07	CXCL9, IL1RN, IL1F9, CXCL1, CXCL3, CXCL2, FGF2, CXCL5, CX3CL1, TNFSF13B, CXCL16, NAMPT, TNFSF11, TIMP1, MIF, GREM1, GREM2, FLT3L, SCG2, CCL11, CCL9, CCL8, CCL7, CCL6, CCL4, SPP1, CCL3, CCL2, WNT2, CCL17, GDF10, IL33, TGFB2, TSLP, TNFSF14, TGFB3, GDF15, TNFSF15, IL34, OSM, LIF, INHBB, INHBA, GDF3, GDF6, BMP6, BMP5, VEGFA, IL1F10, GDF7, BMP4, BMP3, IL6, BMP2, KITL, IL7, TNFSF9, TNFSF8, CCL28, PF4	2559	214	17446	1.91145	0.00117553	0.000106929	0.000104723
KEGG_PATHWAY	mmu04060:Cytokine-cytokine receptor interaction	67	1.83914	6.57345e-07	CNTFR, CXCL9, CD40, EDA, CSF3R, CXCL1, CXCL2, CXCL5, CX3CL1, TNFSF13B, CXCL16, IL18RAP, TNFSF11, CCR5, IL13RA1, IFNAR2, IL15RA, IL1R1, IL1R2, TNFRSF19, OSMR, EDAR, IL6ST, TNFRSF21, IFNAR1, CX3CR1, CSF1R, CCL11, IL4RA, CXCR4, IL6RA, TNFRSF11B, TNFRSF11A, IL2RG, ACVR1B, CCL9, CCL8, CCL7, CCL6, CCL4, CCL3, IL21R, CCL2, TNFRSF14, CCL17, CCR1, NGFR, TGFB2, XCR1, TSLP, TNFSF14, TGFB3, TNFSF15, TNFRSF9,…	1170	242	7691	1.81994	0.00018404	2.30893e-05	1.82413e-05
GOTERM_BP_DIRECT	GO:0001649~osteoblast differentiation	38	1.0431	8.22674e-07	SEMA7A, DLX5, DHX9, LRRC17, TNC, FHL2, ADAR, GLI2, SOX2, GJA1, WNT11, FGF9, TMSB4X, PENK, CCL3, SPP1, RSPO2, SOX8, JUNB, GDF10, MEF2C, IGFBP5, MSX2, IGFBP3, IGF1, BMP6, TGFBR3, BMP4, BMP3, VCAN, SFRP1, BMP2, FASN, COL6A1, ITGA11, TMEM119, ALPL, SP7	2634	113	18082	2.30853	0.00517026	0.000172762	0.000167798
GOTERM_BP_DIRECT	GO:0007165~signal transduction	243	6.67033	1.27974e-06	VIPR1, OXTR, VIPR2, MRGPRF, RAPH1, RXFP3, HTR6, GJA1, RASSF2, HTR7, EDNRB, RASSF3, ADGRA2, RASSF4, RASSF6, SOX8, CMKLR1, ARRDC4, PRKAB2, DAPK1, IL1R1, UNC5B, ARRDC3, UNC5C, TIAM2, OMP, ADGRB2, ULK2, SPARCL1, RIN2, PLPP1, PTGFR, PDE1C, RRAD, PDE1A, PEX11A, IGSF1, IQGAP1, PIK3R1, LPAR4, HIF1A, PLCG2, HIVEP1, HIVEP2, FZD1, STAT5A, CCR1, NGFR, GPR17, FZD3, FZD2, FZD5, BCL11A, FZD6, PDE2A, GDF3, PPP1R…	2634	1255	18082	1.32921	0.0080312	0.000260076	0.000252604
GOTERM_BP_DIRECT	GO:0035456~response to interferon-beta	9	0.247049	1.56999e-06	IFNAR2, IFITM3, BST2, PLSCR1, IFITM1, IFITM2, STAT1, XAF1, IKBKE	2634	9	18082	6.86484	0.00984373	0.000307396	0.000298564
GOTERM_BP_DIRECT	GO:0007204~positive regulation of cytosolic calcium ion concentration	45	1.23525	1.61017e-06	PTGFR, OXTR, PTGER1, PTGER2, C5AR1, ADM, ADRA1D, CXCL1, ITPR3, CACNA1C, HTR2A, PTH1R, CXCL3, ADRA1B, PKD1, CXCL2, MCHR1, ADCY5, GJA1, JPH2, GNG3, C1QTNF1, EDNRB, TBXA2R, CCL3, ABL1, PLCG2, KDR, BDKRB2, CD38, PTK2B, JAK2, CCR5, PRKG1, CCR1, PDGFRA, PTGIR, FZD2, TRPC6, GPR35, F2R, TRPC2, AGT, AGTR1B, CCL28	2634	148	18082	2.08728	0.0100944	0.000307396	0.000298564
GOTERM_MF_DIRECT	GO:0050840~extracellular matrix binding	16	0.439198	1.67525e-06	OLFML2B, ELN, SSC5D, OLFML2A, THBS1, DCN, VEGFA, ADAMTS5, ADGRG1, SPOCK2, SMOC1, ADGRG6, SPP1, SPARCL1, CD248, TGFBI	2559	28	17446	3.89572	0.00299923	0.000250311	0.000245146
KEGG_PATHWAY	mmu04015:Rap1 signaling pathway	60	1.64699	1.76379e-06	ITGAM, FLT4, CTNND1, ITGAL, FGF2, ACTB, ACTG1, FGF5, FGF7, FGF9, KDR, MAP2K3, PDGFRB, MAGI1, PDGFRA, MAP2K1, HGF, F2R, NGF, APBB1IP, ADORA2B, TLN2, PRKD1, TLN1, MET, PLCB2, CSF1R, RALB, RGS14, PIK3R3, PIK3R1, ADCY1, LPAR4, ADCY8, THBS1, ADCY7, EGFR, ADCY5, RASGRP3, PIK3R5, PDGFC, MAP2K6, FARP2, NGFR, ANGPT4, ANGPT2, ANGPT1, VEGFC, VEGFD, IGF1, MAPK13, VEGFA, EFNA1, FGF14, KITL, ID1, FGF18, CALM1,…	1170	214	7691	1.84304	0.000493739	5.13274e-05	4.05504e-05
GOTERM_BP_DIRECT	GO:0008284~positive regulation of cell proliferation	120	3.29399	1.79511e-06	CNTFR, TNC, SCX, RBPJ, FGF2, FGF5, CDC20, FGF7, PRL2C3, EDNRB, CCND2, FGF9, FNTA, PLAU, MYC, KDR, ENPP2, PDGFRB, PDGFRA, HGF, CLEC11A, F2R, SOX11, EREG, BTC, SFRP1, SFRP2, MYCN, PGR, EPHA1, IL6ST, TSPYL5, PTGFR, CSF1R, CALCRL, SHMT2, EIF5A2, AKR1C18, HIF1A, PLAC8, PKHD1, DPP4, PDGFC, WNT2, DRD3, STAT5A, TGFB2, JUN, FN1, LIF, IGF1, BMP4, ACER2, IL6, GDNF, KITL, BAMBI, FGF18, ID4, FGFR1OP, MDM4, FG…	2634	542	18082	1.51989	0.0112473	0.000324633	0.000315306
GOTERM_BP_DIRECT	GO:0043065~positive regulation of apoptotic process	82	2.25089	1.80352e-06	STEAP3, ADM, PYCARD, CASP12, RASSF2, FAM162A, RASSF6, CASP1, CYP1B1, CASP2, BCL2A1D, MAP3K9, JAK2, PHLDA1, PHLDA3, BOK, PDGFRB, EPHA7, SPINK2, ANXA1, MSX2, DUSP1, SP110, IGFBP3, ANXA5, PAWR, PLA2G4A, UNC5C, NGF, MMP9, ALDH1A3, SFRP4, PLSCR1, SFRP1, SFRP2, ALDH1A2, KCNMA1, ALDH1A1, TXNIP, RARB, PDE5A, PPARG, NUPR1, ARHGEF7, TLR3, ADRB1, PTGS2, HIF1A, UACA, WNT11, BCL2L11, ACVR1C, FRZB, INPP5D, NTF…	2634	335	18082	1.68035	0.0112996	0.000324633	0.000315306
GOTERM_BP_DIRECT	GO:0045766~positive regulation of angiogenesis	39	1.07055	1.87827e-06	SEMA5A, ACVRL1, CX3CR1, CCL11, C5AR1, HSPB1, ADM, THBS1, HIF1A, FGF2, CX3CL1, C3, TBXA2R, ZC3H12A, KDR, CYP1B1, PTK2B, PRL2C2, ANGPT4, CCBE1, ANGPT2, HGF, SPHK1, ERAP1, CYBB, VEGFC, CELA1, VEGFD, MMP9, VEGFA, HIPK2, GREM1, PDCL3, SFRP2, LRG1, ADM2, PRKD1, HC, EPHA1	2634	121	18082	2.21264	0.0117652	0.000328697	0.000319254
KEGG_PATHWAY	mmu05414:Dilated cardiomyopathy	31	0.850947	1.9552e-06	RYR2, ITGB5, ADRB1, CACNA1C, ADCY1, ADCY8, ADCY7, ACTB, ADCY5, ACTG1, SGCA, LMNA, DAG1, DMD, ITGB7, ITGB6, TGFB2, ITGA3, TGFB3, ITGA2, TNNC1, TPM2, ITGA1, TPM1, IGF1, CACNB2, DES, TNNT2, ITGA11, ITGA8, ITGA7	1170	83	7691	2.45516	0.000547305	5.13274e-05	4.05504e-05
KEGG_PATHWAY	mmu05410:Hypertrophic cardiomyopathy (HCM)	30	0.823497	2.00926e-06	RYR2, ITGB5, PRKAG2, CACNA1C, ACTB, ACTG1, SGCA, LMNA, DAG1, DMD, ITGB7, ITGB6, PRKAB2, TGFB2, ACE, ITGA3, TGFB3, ITGA2, TNNC1, TPM2, ITGA1, TPM1, IGF1, CACNB2, IL6, DES, TNNT2, ITGA11, ITGA8, ITGA7	1170	79	7691	2.49627	0.000562434	5.13274e-05	4.05504e-05
GOTERM_BP_DIRECT	GO:0001503~ossification	33	0.905847	2.88584e-06	FOXC2, SLC26A2, IFITM1, DLX5, LRRC17, STC1, PTH1R, TNFRSF11A, SBNO2, RASSF2, SPP1, TNFSF11, SOST, GPM6B, GDF10, RSAD2, MSX2, AHSG, KAZALD1, MMP9, BMP6, BMP5, BMP4, BMP3, MMP14, BMP2, COL2A1, MMP16, FGF18, MGP, TMEM119, OSTN, ATP6V1B1	2634	96	18082	2.35979	0.0180194	0.000491373	0.000477256
GOTERM_BP_DIRECT	GO:0007399~nervous system development	89	2.44304	3.13962e-06	SEMA5A, SEMA5B, NRP1, CHD5, GRIK1, GLDN, CDC20, NRBP2, CHL1, INSC, ZC3H12A, CHAC1, EPHB2, RGS9, NEO1, EPHB1, EPHB3, SEMA6B, EPHA7, MBNL1, RBFOX1, MEF2C, SEMA6A, DSCAM, DCC, SOX11, GFRA1, FOS, MTSS1, OLFM1, IMPACT, TRNP1, ITGA8, ULK2, TNIK, PRKD1, ARHGEF7, NBL1, NGEF, GAS7, SEMA7A, SMARCD3, NRN1, SEMA3C, SEMA3D, SLC1A2, CRMP1, CXCR4, NDNF, GDPD5, ASCL2, DLL1, HDAC9, RTN4, EFNB1, ADGRG1, CHN1, NTF3…	2634	377	18082	1.62061	0.0195884	0.000520516	0.000505561
KEGG_PATHWAY	mmu04810:Regulation of actin cytoskeleton	59	1.61954	3.31812e-06	MYLK2, ITGAM, ITGB5, CHRM5, ITGAL, FGF2, ACTB, MYLK, ACTG1, FGF5, FGF7, FGF9, TMSB4X, BDKRB2, BDKRB1, PIP4K2A, ITGB7, ITGB6, PDGFRB, PDGFRA, MAP2K1, ITGA3, ITGA2, ACTN1, ITGA1, F2R, ACTN4, VAV1, MYL7, ITGA8, ITGA7, ARHGEF4, PPP1R12B, EZR, ARHGEF7, MYL9, VCL, ROCK1, WAS, PIK3R3, PIK3R1, IQGAP1, MYL12A, EGFR, PIK3R5, FGD3, PAK1, PDGFC, PIP5K1C, GSN, LIMK2, FN1, ARPC4, ARPC5, FGF14, FGF18, ITGA11, F…	1170	213	7691	1.82083	0.000928644	7.76993e-05	6.13852e-05
KEGG_PATHWAY	mmu04020:Calcium signaling pathway	52	1.4274	3.76518e-06	RYR1, MYLK2, RYR2, OXTR, CHRM5, ATP2A3, ADRA1D, HTR2A, ADRA1B, MYLK, PPP3CA, HTR6, EDNRB, HTR7, BDKRB2, BDKRB1, CD38, PDGFRB, PDGFRA, TNNC1, SPHK1, F2R, AGTR1B, ADRB3, ADORA2B, PLCB2, PTGFR, PDE1C, PTGER1, PDE1A, ADRB1, ITPR3, CACNA1C, ADCY1, ADCY8, ADCY7, EGFR, CACNA1H, TBXA2R, GNA11, PLCG2, PTK2B, DRD1, CAMK2G, DRD5, NOS2, ATP2B4, GRIN2D, P2RX3, P2RX1, CAMK4, CALM1	1170	180	7691	1.89901	0.0010537	8.13858e-05	6.42977e-05
GOTERM_BP_DIRECT	GO:0071347~cellular response to interleukin-1	29	0.796047	4.0628e-06	CEBPB, CCL11, SAA3, ADAMTS12, HIF1A, CXCL2, TANK, CX3CL1, ICAM1, PYCARD, CCL9, CCL8, CCL7, CCL6, MYC, CCL4, ZC3H12A, HYAL3, CCL3, CCL2, CCL17, ADAMTS7, DAB2IP, FN1, ACOD1, IL6, SFRP1, IRF1, LCN2	2634	80	18082	2.48851	0.0252748	0.000639891	0.000621507
GOTERM_BP_DIRECT	GO:0048661~positive regulation of smooth muscle cell proliferation	29	0.796047	4.0628e-06	NOTCH3, CALCRL, IL6RA, RBPJ, PTGS2, THBS1, HIF1A, FGF2, AIF1, WISP1, EGFR, CX3CL1, MYC, NAMPT, S1PR1, PPARGC1A, PDGFRB, JUN, STAT1, ITGA2, IGF1, VEGFA, FOXP1, EREG, BMP4, IL6, NR4A3, CDH13, FGFR2	2634	80	18082	2.48851	0.0252748	0.000639891	0.000621507
GOTERM_MF_DIRECT	GO:0005518~collagen binding	24	0.658798	4.06612e-06	SRGN, DDR1, CCBE1, LRRC15, ACHE, ECM2, ITGA3, ITGA2, ITGA1, PODN, ASPN, DCN, DPP4, COMP, ADGRG1, PAK1, C1QTNF1, MMP13, ABI3BP, ADGRG6, ITGA11, SPARCL1, CSPG4, TGFBI	2559	59	17446	2.77322	0.00726406	0.000560812	0.000549239
GOTERM_BP_DIRECT	GO:0050679~positive regulation of epithelial cell proliferation	28	0.768597	4.34422e-06	DLX5, C5AR1, NOD2, FGF2, EGFR, FGF7, CCND2, FGF9, MYC, KDR, GLUL, EYA1, DAB2IP, VEGFC, IGF1, CYP7B1, BMP6, FOXP2, BMP5, VEGFA, FOXP1, BMP4, IL6, SFRP1, NR4A3, ESRP2, ID1, FGFR2	2634	76	18082	2.52915	0.0270017	0.000667526	0.000648348
GOTERM_CC_DIRECT	GO:0042995~cell projection	146	4.00769	4.4173e-06	CEP126, FHOD1, WWC1, CCP110, ESPN, MYLK, ALCAM, ADGRA2, GJA5, DZIP1L, CDK20, PIEZO1, NRCAM, FAM65B, KIF21A, CAR9, KIF21B, EPHB2, SYNPO, GLUL, EPHB1, EPHB3, MAGI1, GAMT, KIRREL3, PPP1R16B, DSCAM, ACTN1, LMTK3, CYS1, SRCIN1, MAPK8IP3, ENKUR, TIAM2, OLFM1, ARC, BIN2, FSCN1, NSMF, TTLL11, EZR, TLN1, NGEF, RTN4, MTM1, DPP4, FLRT3, SYNDIG1, LPXN, NDN, PIP5K1C, MYH10, DRD3, DNAH17, HOMER2, CADM2, RAB3IP…	2814	712	19662	1.43277	0.00358924	0.000138296	0.000129121
GOTERM_BP_DIRECT	GO:0030308~negative regulation of cell growth	39	1.07055	4.49646e-06	ACVRL1, CDA, RRAD, FHL1, PTPRJ, ACVR1B, RTN4, RERG, MNDAL, ZC3H12D, NPPB, TRO, CYP27B1, GJA1, WNT11, FRZB, GNG4, DACT3, BDKRB1, SH3BP4, GAS2L1, CGREF1, TGFB2, CDKN2A, AHSG, DAB2IP, INHBA, AGT, DCBLD2, GREM1, BST2, SFRP1, SFRP2, NOV, BCL6, WT1, CTH, PPARG, CRYAB	2634	125	18082	2.14183	0.0279347	0.000674469	0.000655092
GOTERM_CC_DIRECT	GO:0005911~cell-cell junction	54	1.48229	4.86054e-06	WDR1, CTNND1, SLC2A1, PTPRM, ILK, PTPRJ, PTPRK, ITGAL, MYLK, GJA1, SGCA, DAG1, CD53, CXADR, ANXA2, TRPC4, ACTN1, PLEKHG5, ACTN4, VAV1, MYH2, LCK, FSCN1, PKP4, PRKD1, VCL, AHNAK, LAMA1, WAS, PDXP, CXCR4, PIK3R1, IQGAP1, CORO1A, PAK1, PDZD2, FLRT2, FLRT3, FLNA, CDH24, NGFR, CADM3, CADM1, JUP, WTIP, MYO1E, VANGL2, TEC, GJB3, FABP7, FAT1, EPPK1, NECTIN2, ADGRL3	2814	201	19662	1.87716	0.00394867	0.000146536	0.000136815
GOTERM_CC_DIRECT	GO:0009897~external side of plasma membrane	76	2.08619	5.28106e-06	CXCL9, CD40, ITGAM, HFE, H2-K1, CLEC14A, ITGAL, ICAM1, LY6C1, SIGLECE, ADGRE1, ALCAM, ANPEP, KDR, ITGB6, CCR5, B2M, KLRA4, PDGFRA, ITGA3, ITGA2, ITGA1, ANXA5, ICOSL, RTN4RL2, GFRA1, OSMR, GFRA3, TGFBR3, RTN4RL1, TFR2, FCGR4, KCNMA1, CDH13, CD48, IL6ST, ABCG1, H2-D1, TLR2, CD274, SEMA7A, H2-M3, CXCR4, TNFRSF11A, THY1, CLCN3, IL2RG, THBS1, CD59A, PDPN, S1PR1, SLAMF7, TNFRSF14, CD14, LDLR, CD55, ABC…	2814	317	19662	1.67517	0.00428957	0.000153528	0.000143343
KEGG_PATHWAY	mmu05146:Amoebiasis	38	1.0431	5.29719e-06	LAMA5, ITGAM, LAMA1, LAMA3, HSPB1, PIK3R3, PIK3R1, ADCY1, PIK3R5, SERPINB1A, GNA11, SERPINB9B, CD14, TGFB2, SERPINB2, COL27A1, LAMB3, NOS2, COL24A1, LAMB2, TGFB3, IL1R1, ACTN1, IL1R2, FN1, LAMB1, SERPINB9, ACTN4, IL6, COL3A1, COL2A1, COL4A2, COL5A1, COL4A1, SERPINB6B, PLCB2, VCL, TLR2	1170	117	7691	2.13498	0.00148212	0.000106322	8.39983e-05
GOTERM_BP_DIRECT	GO:0035987~endodermal cell differentiation	15	0.411749	5.71879e-06	ITGB5, LAMB3, LAMA3, COL12A1, FN1, LAMB1, INHBA, MMP8, MMP9, MMP14, COL4A2, MMP15, COL6A1, COL8A1, ITGA7	2634	27	18082	3.8138	0.0353927	0.000818827	0.000795302
GOTERM_BP_DIRECT	GO:0016126~sterol biosynthetic process	15	0.411749	5.71879e-06	FDPS, MVK, HMGCS1, INSIG1, DHCR24, MSMO1, CYP51, TM7SF2, CYB5R2, CH25H, SQLE, CYB5R3, PMVK, MVD, HMGCS2	2634	27	18082	3.8138	0.0353927	0.000818827	0.000795302
GOTERM_BP_DIRECT	GO:0016337~single organismal cell-cell adhesion	35	0.960747	6.03655e-06	ITGAM, TTYH1, SRF, LAMA3, CTNND1, ICAM2, THY1, ITGAL, PKD1, EGFR, ICAM1, PKHD1, ARVCF, CDH3, PDPN, CDH24, NRCAM, CD53, CDSN, VCAM1, CXADR, NEGR1, JUP, CD93, FOXF1, LMO7, FNDC3A, SELP, CCDC80, FAT1, PKP1, MYH9, PKP4, PLPP3, LIMS2	2634	108	18082	2.22472	0.0373221	0.000845117	0.000820837
GOTERM_MF_DIRECT	GO:0045499~chemorepellent activity	15	0.411749	6.20849e-06	SEMA5A, SEMA6B, SEMA5B, SEMA4A, EPHA7, SEMA6A, SEMA4D, SEMA3C, SEMA3D, SEMA4C, SEMA3G, SEMA4F, SEMA4G, FLRT2, FLRT3	2559	27	17446	3.7875	0.0110701	0.000795131	0.000778723
GOTERM_BP_DIRECT	GO:0050918~positive chemotaxis	11	0.301949	6.26327e-06	SEMA5A, BMP4, NRP1, FGF7, ANGPT1, PLXNB3, PTPRJ, CORO1A, SCG2, MET, VEGFA	2634	15	18082	5.03422	0.0386964	0.000857795	0.000833151
GOTERM_BP_DIRECT	GO:0001755~neural crest cell migration	21	0.576448	6.78818e-06	SEMA5A, SEMA6B, SEMA5B, LAMA5, SEMA4A, SEMA7A, SEMA6A, SEMA4D, SEMA3C, SEMA3D, SEMA4C, SEMA3G, SEMA4F, SEMA4G, HIF1A, EFNB1, EDNRB, GDNF, KITL, SOX8, NRTN	2634	49	18082	2.94208	0.0418706	0.000909905	0.000883763
GOTERM_BP_DIRECT	GO:0006935~chemotaxis	37	1.01565	7.25538e-06	CX3CR1, CXCL9, CCL11, PTGDR2, C5AR1, ECSCR, CXCR4, CXCL3, CXCL2, CXCL5, CX3CL1, CXCL16, CCL9, CCL8, CCL7, CCL6, CCL4, CCL3, S1PR1, ENPP2, CCL2, PIP5K1C, CCR5, CCL17, CMKLR1, CCR1, PDGFRB, PDGFRA, XCR1, RARRES2, PARVA, CREB3, ACKR4, ACKR3, DOCK2, CCL28, PF4	2634	118	18082	2.15254	0.044687	0.000952268	0.000924909
GOTERM_MF_DIRECT	GO:0030215~semaphorin receptor binding	13	0.356849	7.75159e-06	SEMA5A, SEMA6B, SEMA5B, SEMA4A, SEMA6A, SEMA4D, SEMA3C, SEMA3D, SEMA4C, SEMA3G, SEMA4F, SEMA4G, SH3BGRL3	2559	21	17446	4.22036	0.0138025	0.000926573	0.000907453
GOTERM_BP_DIRECT	GO:0007162~negative regulation of cell adhesion	19	0.521548	8.62219e-06	SEMA5A, ACVRL1, SEMA4D, DSCAM, ANGPT1, TNC, FBLN1, LAMB1, PIK3R1, SRCIN1, RND1, NAT8F1, PLXNB3, DACT2, TNR, CDH13, LPXN, JAM2, MYO1F	2634	42	18082	3.10552	0.0528792	0.00110857	0.00107672
GOTERM_MF_DIRECT	GO:0005089~Rho guanyl-nucleotide exchange factor activity	27	0.741147	9.28656e-06	ARHGEF26, ARHGEF25, ARHGEF10L, FGD2, FGD3, PREX2, DOCK11, MCF2L, EPS8L1, EPS8L2, ARHGEF40, PLEKHG3, FARP2, ARHGEF10, PLEKHG4, PLEKHG2, ARHGEF37, ARHGEF15, PLEKHG5, PLEKHG6, VAV1, TIAM2, ARHGEF3, ARHGEF4, ARHGEF7, NGEF, ARHGEF5	2559	74	17446	2.48747	0.016513	0.00104068	0.0010192
GOTERM_CC_DIRECT	GO:0043234~protein complex	130	3.56849	9.74908e-06	N6AMT1, GUCY1B3, WWC1, CCP110, RBPJ, ACTB, PYCARD, RGS4, RIMS2, CDC20, NPPB, RASSF2, MYC, ZC3H12A, GLUL, PTRF, BORCS7, RGS6, RGS7, GUCY1A3, PDGFRA, MEF2C, UNC13A, CXADR, IL1R1, LMO2, TPM1, MITF, ACTN4, TLE6, RBP4, UTRN, FKBP4, ATP6V0D1, VCL, PEX11A, STXBP2, CACNA1C, PIK3R1, IQGAP1, CORO1A, LTBP1, MYL12A, RTN4, SLC9A3R2, STIP1, MAP2, PRKAR2A, PRKCDBP, HIST1H3B, HIST1H3D, CAV1, HIST1H4M, NEB, PARVA…	2814	628	19662	1.4464	0.00790438	0.000273647	0.000255493
GOTERM_BP_DIRECT	GO:0030336~negative regulation of cell migration	34	0.933297	1.07084e-05	ACVRL1, CX3CR1, IFITM1, IL1RN, SRF, STC1, PTPRJ, PTPRK, THY1, CX3CL1, CNN2, ACAN, WNT11, DACH1, DAG1, KISS1R, CYP1B1, DRD1, CCR5, WNT4, DRD5, IGFBP5, ERDR1, TIE1, TPM1, PODN, BST2, SFRP1, TMEFF2, SFRP2, PLXNB3, EPPK1, EPHA1, FAM60A	2634	106	18082	2.20193	0.065248	0.00134926	0.00131049
GOTERM_BP_DIRECT	GO:0060317~cardiac epithelial to mesenchymal transition	10	0.274499	1.18957e-05	TGFBR3, OLFM1, HEYL, TGFB2, BMP2, HEY1, HEY2, WNT16, WNT2, RTN4	2634	13	18082	5.28065	0.0722148	0.00146946	0.00142725
GOTERM_BP_DIRECT	GO:0001938~positive regulation of endothelial cell proliferation	25	0.686248	1.24063e-05	SEMA5A, ACVRL1, CCL11, FLT4, FGF2, KDR, CCL2, WNT2, STAT5A, PPP1R16B, JUN, EGR3, CAV1, VEGFC, VEGFD, BMP6, VEGFA, BMP4, PDCL3, BMP2, LRG1, PLXNB3, CDH13, PRKD1, SCG2	2634	67	18082	2.56151	0.0751954	0.00150308	0.00145989
KEGG_PATHWAY	mmu04022:cGMP-PKG signaling pathway	47	1.29015	1.25336e-05	MYLK2, GUCY1B3, ROCK1, IRS1, SRF, ATP2A3, ATP1A4, ATP1A3, ADRA1D, ADRB1, ATP1A2, ITPR3, CACNA1C, ADCY1, IRS3, ADRA1B, ADCY8, ADCY7, ADCY5, MYLK, NPPB, PPP3CA, EDNRB, GNA11, KCNMB1, BDKRB2, KCNMB4, PRKG1, GUCY1A3, GUCY1A2, MAP2K1, MEF2C, TRPC6, PDE2A, ATP2B4, NFATC2, ATP1B1, AGTR1B, CREB3, ADRB3, KCNMA1, PDE3A, MRVI1, PDE5A, CALM1, PLCB2, MYL9	1170	163	7691	1.89543	0.00350328	0.000234796	0.000185497
GOTERM_BP_DIRECT	GO:0050729~positive regulation of inflammatory response	24	0.658798	1.30684e-05	STAT5A, IL33, CCL11, ACE, ITGA2, PDE2A, PLA2G4A, EGFR, CX3CL1, GPRC5B, CCL9, CCL8, CCL7, TNIP1, CCL6, CCL4, CCL3, CCL2, CD47, JAK2, CCR5, LDLR, TLR3, TLR2	2634	63	18082	2.61518	0.0790455	0.00155342	0.00150879
GOTERM_CC_DIRECT	GO:0030175~filopodium	27	0.741147	1.34977e-05	PPP1R9A, ACTG2, MTM1, PTPRZ1, ADGRA2, PDPN, DAG1, DMD, KCNN3, VCAM1, CXADR, MYO10, SRCIN1, TIAM2, ACTA2, ACTA1, MYO1B, PALLD, KITL, FSCN1, FAT1, LCP1, EZR, UTRN, FGF13, ACPP, MYO1G	2814	77	19662	2.45006	0.0109271	0.000366238	0.000341942
KEGG_PATHWAY	mmu04611:Platelet activation	40	1.098	1.48321e-05	MYLK2, GUCY1B3, ROCK1, PIK3R3, ITPR3, PIK3R1, ADCY1, ADCY8, RASGRP1, ADCY7, MYL12A, ACTB, ADCY5, MYLK, ACTG1, PIK3R5, PTGS1, TBXA2R, PLCG2, PRKG1, GUCY1A3, P2RY12, GUCY1A2, PTGIR, COL27A1, COL24A1, ITGA2, F2R, PLA2G4C, PLA2G4A, MAPK13, APBB1IP, COL3A1, COL2A1, COL5A1, P2RX1, BTK, TLN2, TLN1, PLCB2	1170	131	7691	2.00718	0.00414441	0.000260489	0.000205795
GOTERM_BP_DIRECT	GO:0055085~transmembrane transport	84	2.30579	1.49692e-05	SLC46A3, RYR1, RYR2, KCNG3, ABCD2, SLC35B4, KCNC2, SLC23A1, SLC2A1, SLC2A3, GJA1, SLC22A18, SLC16A7, SLC25A40, SLC25A42, SLC16A2, SLC25A45, SLC18A1, SLC16A3, MFSD4B1, SLC16A4, SLC18A2, SLC39A4, KCNH1, ABCC1, TRPC6, SVOP, ABCA8A, TRPC4, KCND3, TRPC1, SLC2A13, TRPC2, SPNS2, TAP1, SLC39A10, ABCC9, KCNAB1, SLC30A1, SLC39A14, SLC5A7, SCN8A, KCNMA1, KCNQ5, ABCG3, HCN4, SLC22A4, SLC26A2, SLC24A3, CATSPE…	2634	364	18082	1.58419	0.0900097	0.0017464	0.00169623
GOTERM_BP_DIRECT	GO:0071346~cellular response to interferon-gamma	25	0.686248	1.65467e-05	CCL11, H2-Q7, AIF1, CX3CL1, CCL9, CCL8, CCL7, CCL6, MYC, CCL4, MRC1, CCL3, CCL2, GBP2, CCL17, GBP3, GBP6, GBP5, GBP7, NOS2, DAPK1, GBP9, ACOD1, TLR3, H2-AB1	2634	68	18082	2.52384	0.0990103	0.00189535	0.00184089
GOTERM_BP_DIRECT	GO:0016477~cell migration	51	1.39995	1.77661e-05	NRP1, WWC1, PTPRK, TNN, KDR, BDKRB1, JAK2, EPHB3, PDGFRB, RHBDF1, PDGFRA, GFRA1, SSTR4, ARC, MMP14, PALLD, PEAK1, FSCN1, ITGA7, LCP1, CD47, ERG, EPHA3, LAMA5, ASAP3, CXCR4, ADAMTS12, CORO1A, THBS1, ADGRG1, RELN, S1PR1, HES1, FAM83D, GPC6, CLASP2, CTHRC1, TGFB2, JUP, NFATC2, LAMB1, SORBS2, ARPC5, SORL1, VEGFA, EFNA1, COL5A1, BAMBI, FAT1, CD248, DCHS1	2634	191	18082	1.83302	0.105906	0.00199868	0.00194126
GOTERM_CC_DIRECT	GO:0045177~apical part of cell	35	0.960747	1.85494e-05	IFITM3, EDA, HFE, C5AR1, PLAT, ITPR3, LRP2, VLDLR, SLC25A27, EPB41L4B, ATP7B, PDZD2, CHL1, INSC, SPP1, CDH23, ABCB1A, LDLR, DRD3, AMN, FZD3, JAG1, VCAM1, HOMER2, FZD6, SHROOM3, EDAR, MYO1B, CLCN5, ADGRF5, ITGA8, DCHS1, FAT4, EZR, ACPP	2814	115	19662	2.12654	0.0149859	0.000487072	0.00045476
GOTERM_MF_DIRECT	GO:0046982~protein heterodimerization activity	111	3.04694	1.89178e-05	GUCY1B3, UGT1A10, H2-K1, SCX, IKZF4, RIMS2, SOX2, SOX18, MYC, CAPN2, SOX8, SOX6, KCNH1, SOX5, GUCY1A3, MEF2C, UNC13A, HGF, CYBB, TAP1, FOXP4, MID1, MID2, FOXP2, FOXP1, NPAS4, RBP4, MAF, RRAGC, IL6ST, ABCG1, H2-D1, NRN1, ZBTB1, ADRB1, PIK3R1, HIF1A, SPTA1, IRAK2, DRD1, KCNN3, FZD1, TGFB2, JUN, FZD2, TGFB3, HOMER2, CAV1, INHBB, INHBA, BMP6, NR4A2, BMP2, BHLHE40, H2-AB1, ITGAM, HIP1, ITGAL, ADRA1B, …	2559	514	17446	1.47226	0.0333511	0.00199527	0.0019541
GOTERM_BP_DIRECT	GO:0006469~negative regulation of protein kinase activity	31	0.850947	1.94698e-05	LRRC15, LRTM1, PRKAG2, ILK, HSPB1, THY1, PPM1E, SOCS3, SOCS1, FLRT2, FLRT3, SH3BP5, DRD1, DRD5, GADD45B, GADD45A, CDKN2A, RTN4RL2, PODN, ASPN, DCN, GADD45G, IL6, DBNDD2, PPP1R1A, RTN4RL1, PKIA, FGFR1OP, TRIB3, PKN1, EPHA1	2634	95	18082	2.24011	0.115454	0.00215193	0.00209011
GOTERM_BP_DIRECT	GO:0048843~negative regulation of axon extension involved in axon guidance	14	0.384299	2.06763e-05	SEMA5A, SEMA6B, SEMA5B, NRP1, SEMA4A, SEMA6A, SEMA4D, SEMA3C, SEMA3D, SEMA4C, SEMA3G, SEMA4F, SEMA4G, SLIT1	2634	26	18082	3.69645	0.122153	0.00224588	0.00218135
GOTERM_BP_DIRECT	GO:0007169~transmembrane receptor protein tyrosine kinase signaling pathway	32	0.878397	2.15028e-05	DDR1, CSF1R, PILRB1, FLT4, EGFR, NTF3, KDR, NRTN, EPHB2, SH2D6, EPHB1, EPHB3, PDGFRB, PDGFRA, EPHA7, ANGPT2, ANGPT1, NTRK3, GFRA1, GFRA3, HCK, DOK2, TEC, GDNF, LCK, BTK, ROR1, CSPG4, EPHA1, MET, ANGPTL1, EPHA3	2634	100	18082	2.19675	0.126713	0.00229606	0.0022301
GOTERM_BP_DIRECT	GO:0060326~cell chemotaxis	27	0.741147	2.3909e-05	SEMA5A, CXCL9, SAA3, CXCL1, CXCL2, CXCL5, CX3CL1, CCL9, CCL8, CCL6, CCL4, CCL3, ENPP2, CCL2, EPHB1, PDGFRB, PDGFRA, ABCC1, VCAM1, HGF, ITGA1, VEGFA, NOV, BIN2, GPR183, PLXNB3, CCL28	2634	78	18082	2.37629	0.139854	0.00246929	0.00239835
GOTERM_BP_DIRECT	GO:0071260~cellular response to mechanical stimulus	27	0.741147	2.3909e-05	CD40, SCX, ATP1A2, PTGS2, EGFR, NPPB, CNN2, GJA1, BAG3, CASP4, CASP1, DAG1, HABP4, CASP2, KCNJ2, TNFSF14, GADD45A, ITGA2, BNIP3, CAV1, PDE2A, BMP6, AGT, MAG, IRF1, FAS, TLR3	2634	78	18082	2.37629	0.139854	0.00246929	0.00239835
GOTERM_BP_DIRECT	GO:0030324~lung development	37	1.01565	2.4435e-05	LAMA5, CEBPA, SLC23A1, FGF2, EGFR, GLI2, FGF7, FGF9, PDPN, GPC3, KDR, HES1, PITX2, WNT2, CCBE1, PDGFRA, ITGA3, FOXF1, LIF, IGF1, FOXP2, VEGFA, FOXP1, BMP4, RBP4, MMP14, MYCN, NFIB, CRISPLD2, ALDH1A2, FGF18, MGP, SPRY2, ZFPM2, STK40, ADA, FGFR2	2634	124	18082	2.04838	0.1427	0.00247278	0.00240174
GOTERM_BP_DIRECT	GO:0007568~aging	47	1.29015	2.47278e-05	ADM, ADRA1D, ABAT, HTR2A, PTH1R, PPP1R9A, FGF2, POLB, CYP27B1, EDNRB, KCNMB1, UCP2, PENK, TIMP2, CCL2, CASP2, DMD, TIMP1, PPARGC1A, SLC18A2, CTSC, NQO1, JUN, GSN, TRPC6, VCAM1, IGFBP5, CDKN2A, TGFB3, MBD1, IGFBP2, FOS, SOD2, AGT, DCN, NFKB2, MSRA, IL6, COL3A1, ADRB3, SERPING1, NOX4, ALDOC, IFI27L2A, CRYAB, ADA, ND4	2634	173	18082	1.86502	0.14428	0.00247278	0.00240174
GOTERM_CC_DIRECT	GO:0043005~neuron projection	92	2.52539	2.49396e-05	ACHE, RYR2, PTGDR2, KCNC2, ABAT, PPP1R9A, HNMT, RIMS2, PCLO, KIF5C, CASP4, KDR, CASP1, TIMP2, BDKRB1, NEFM, KIF1A, GLUL, SLC18A2, PSPH, SPINK2, UNC13A, CXADR, KCND3, SPHK1, ITGA1, PAWR, UNC5C, ACTN4, FOS, SRCIN1, MAPK8IP3, SSTR4, RGMA, SEPT3, EXOC4, CDH13, NSMF, S100A4, PGR, HAP1, FKBP4, SGK1, ATP6V0D1, ARHGEF7, MET, HCN4, CX3CR1, TPH2, TPH1, SLC1A2, ATP1A2, PIK3R1, IQGAP1, PTGS2, CYGB, RTN4, PDZ…	2814	420	19662	1.53053	0.0200964	0.000634402	0.000592316
GOTERM_BP_DIRECT	GO:0071356~cellular response to tumor necrosis factor	34	0.933297	2.51962e-05	CEBPA, PID1, CCL11, ADAMTS12, THBS1, TANK, CX3CL1, ICAM1, ZFP36L1, PYCARD, CCL9, CCL8, CCL7, CCL6, CCL4, ZC3H12A, HYAL3, CCL3, CCL2, CCL17, PPARGC1A, PCK2, ADAMTS7, POSTN, VCAM1, DAB2IP, ACOD1, IL6, SFRP1, IRF1, LCN2, BIRC2, TNFRSF21, BIRC3	2634	110	18082	2.12186	0.146802	0.00248025	0.002409
GOTERM_BP_DIRECT	GO:0007507~heart development	64	1.75679	2.56423e-05	NRP1, OXTR, ADM, PTPRJ, RBPJ, PKD1, PCSK5, GLI2, GJA1, SOX18, HEY2, PITX2, BVES, MAP2K1, MEF2C, MYOCD, CXADR, ITGA3, KCNAB1, FOXP4, MMP9, FOXP1, VCAN, RBP4, MMP13, ALDH1A2, TNNT2, PPARG, ZFPM2, FREM2, CDKL1, FOXC2, CALCRL, SEMA3C, SRF, CACNA1C, LRP2, HDAC9, ZFP36L1, ACAN, PDLIM3, ADAP2, FLRT3, OXCT1, GNA11, MYH10, HEXIM1, TGFB2, VCAM1, FOXF1, NTRK3, MBD1, PDE2A, DAW1, MICAL2, SOD2, HOPX, BMP4, CO…	2634	261	18082	1.68333	0.149196	0.00248533	0.00241392
GOTERM_BP_DIRECT	GO:0008360~regulation of cell shape	40	1.098	2.71445e-05	CSF1R, CCL11, WDR1, PALM2, LST1, SYNE3, CORO1A, MYL12A, ICAM1, SPTA1, CCL7, PALMD, PDPN, CCL3, KDR, CCL2, MYH14, PTK2B, MYH10, BVES, SEMA4A, ANXA1, SEMA4D, MYO10, TPM1, FN1, SHROOM3, PARVA, S100B, VEGFA, HCK, IL6, FMNL1, BAMBI, TAOK2, PLXNB3, ITGA7, MYH9, EZR, GAS7	2634	139	18082	1.97549	0.157212	0.00259106	0.00251662
GOTERM_MF_DIRECT	GO:0005201~extracellular matrix structural constituent	18	0.494098	2.8306e-05	COL27A1, COL24A1, LAMA1, ELN, FBLN1, LAMB1, PRELP, HAPLN4, COMP, ACAN, VCAN, COL3A1, COL2A1, COL4A2, COL5A1, COL4A1, MGP, PXDN	2559	41	17446	2.99305	0.0494869	0.00275104	0.00269427
GOTERM_BP_DIRECT	GO:0007422~peripheral nervous system development	12	0.329399	2.86698e-05	HEYL, NFASC, EDNRB, EGR3, ADGRB2, GDNF, ARTN, NTF3, OSM, SOX8, NGF, SLC5A3	2634	20	18082	4.11891	0.165273	0.00269581	0.00261836
GOTERM_MF_DIRECT	GO:0017147~Wnt-protein binding	15	0.411749	2.91521e-05	FZD1, FZD3, FZD2, FZD5, FZD6, PTPRO, SFRP4, SFRP1, SFRP2, WIF1, FRZB, ROR1, TRABD2B, CTHRC1, WLS	2559	30	17446	3.40875	0.0509279	0.00275104	0.00269427
GOTERM_BP_DIRECT	GO:0048839~inner ear development	24	0.658798	3.11739e-05	PDGFRB, C1QB, H2-T23, CEBPA, TGFB2, JAG1, CEBPD, IFI204, TGFB3, H2-K1, IGF1, CYS1, DLL1, POU3F4, SOX2, SLC25A27, BMP2, MAF, COL2A1, BMPER, C1QTNF5, CDH23, LGR5, FREM2	2634	66	18082	2.49631	0.178341	0.00288817	0.00280519
KEGG_PATHWAY	mmu04350:TGF-beta signaling pathway	29	0.796047	3.17275e-05	ROCK1, ACVR1B, THBS1, LTBP1, ACVR1C, MYC, PITX2, TGIF1, CDKN2B, TGFB2, TGIF2, TGFB3, FST, SMAD9, INHBB, INHBA, GDF6, SMAD6, BMP6, DCN, BMP5, GDF7, BMP4, BMP2, BAMBI, ID1, ID4, ID3, NBL1	1170	85	7691	2.24272	0.0088445	0.000524437	0.000414324
GOTERM_BP_DIRECT	GO:0045944~positive regulation of transcription from RNA polymerase II promoter	191	5.24293	3.38705e-05	SPI1, PID1, MAML2, FHOD1, SCX, RBPJ, FGF2, IKZF4, SOX2, RPS6KA3, RPS6KA5, SOX18, MYC, ZC3H12A, NAMPT, TNFSF11, SOX8, HOXA7, PITX2, CCNL1, SOX6, JUNB, PRL2C2, SOX5, MEF2C, LMO4, LMO2, IFRD1, SOX11, MITF, CYS1, EBF4, FOXP3, FOXP1, NPAS4, SFRP2, MYCN, MAF, TFR2, PGR, PRKD1, ZFPM2, NOTCH3, DLX5, TNKS, PIK3R1, HIF1A, NPAS2, PLAC8, HELZ2, SBNO2, NDN, CAMTA2, PPARGC1A, WNT2, DRD3, STAT5A, JUN, JAG1, FZD…	2634	995	18082	1.31777	0.192184	0.00309252	0.00300367
GOTERM_BP_DIRECT	GO:0042493~response to drug	78	2.14109	3.44907e-05	OXTR, PTPRM, ABAT, HTR2A, AACS, ICAM1, NPPB, CDH3, KDR, CASP1, TIMP2, CD38, CAR9, JUNB, B2M, APOBEC1, TGIF1, ABCC1, ANXA1, UGT1A1, HMGCS1, ITGA3, ITGA2, IGFBP2, CYBB, FOS, MMP9, AGTR1B, SFRP1, SFRP2, LCK, DAD1, ALDH1A1, TXNIP, PPARG, CCNO, SLC1A2, ATP1A3, TNFRSF11B, AK4, ADCY1, PTGS2, THBS1, RAD54B, CYP27B1, TBXA2R, OXCT1, CCL3, ABL1, PTK2B, DRD1, DRD3, PPARGC1A, ABCB1B, MAP2K6, FZD1, ABCA1, CBX7…	2634	339	18082	1.57952	0.195335	0.00310416	0.00301498
GOTERM_BP_DIRECT	GO:0001568~blood vessel development	25	0.686248	3.75012e-05	FOXC2, CHD7, PKD1, HIF1A, FOXS1, HEY1, SOX18, GJA5, HEY2, PDGFRB, MEF2C, TGFB2, FOXF1, TIE1, SPHK1, TBX3, AGT, VEGFA, AGTR1B, TGFBR3, BMP4, COL3A1, COL5A1, ALDH1A2, PLPP3	2634	71	18082	2.4172	0.210456	0.00331	0.00321491
GOTERM_BP_DIRECT	GO:0052697~xenobiotic glucuronidation	8	0.219599	3.78286e-05	UGT1A10, UGT1A1, UGT1A5, UGT1A2, UGT1A9, UGT1A6A, UGT1A6B, UGT1A7C	2634	9	18082	6.10208	0.212083	0.00331	0.00321491
GOTERM_CC_DIRECT	GO:0001726~ruffle	30	0.823497	3.877e-05	ROCK1, ARHGAP1, ASAP3, IQGAP1, AIF1, FGD2, MTM1, PAK1, PDPN, ABL1, EPS8L1, EPS8L2, S100A11, GSN, ANXA2, MYO10, ACTN1, LAYN, COBL, S100B, PALLD, FSCN1, S100A6, MYH9, LCP1, TLN2, TLN1, EZR, ARHGEF7, GAS7	2814	95	19662	2.20649	0.0310666	0.000956326	0.000892885
GOTERM_CC_DIRECT	GO:0005901~caveola	28	0.768597	4.09427e-05	IRS1, SLC2A1, AKAP6, ATP1A2, SLC2A3, HTR2A, PTGS2, CACNA1H, S1PR1, PRKCDBP, DRD1, JAK2, LDLR, BVES, PTRF, P2RY12, KCND3, TRPC4, PTCH1, CAV1, F2R, MYOF, ATP1B1, SELE, EHD2, HCK, KCNMA1, CDH13	2814	86	19662	2.2749	0.0327788	0.000956396	0.00089295
GOTERM_CC_DIRECT	GO:0014704~intercalated disc	20	0.548998	4.11227e-05	CXADR, JUP, FHOD1, ANXA5, ATP1A2, KCNA5, AKAP6, ATP1B1, ADRA1B, MYH1, PAK1, GJA1, DES, GJA5, PGM5, FGF13, VAMP5, KCNJ2, SCN1B, VCL	2814	51	19662	2.74008	0.0329205	0.000956396	0.00089295
GOTERM_BP_DIRECT	GO:0006811~ion transport	121	3.32144	4.22237e-05	KCNG3, STEAP3, STEAP4, SLC23A1, HFE, SLC4A2, BEST3, BEST1, PIEZO2, PIEZO1, MFSD4B1, SCN1B, SLC39A4, KCNH1, SCARA5, KCNK13, CYBB, SLC30A1, ATP1B1, CACNB2, SLC5A7, SCN8A, KCNQ5, ATP6V0D1, STEAP1, STEAP2, SLC22A4, SLC26A2, CHRNA2, TTYH1, SLC22A2, ITPR3, SLCO1A5, SLCO5A1, CACNA1C, SLC5A3, LRRC55, NALCN, CACNA1H, KCNMB1, CLCA2, KCNMB4, KCNE1L, KCNN3, SCN3B, ATP6V1D, ASIC3, ATP6V0A1, SLC38A4, KCNF1, SL…	2634	584	18082	1.42234	0.233604	0.00364396	0.00353927
GOTERM_BP_DIRECT	GO:0030282~bone mineralization	16	0.439198	4.83983e-05	KLF10, PTH1R, PTGS2, DNM3OS, ASPN, MTSS1, CYP27B1, SBNO2, BMP2, MMP13, WNT11, RSPO2, GPC3, GLA, FGFR2, IFITM5	2634	35	18082	3.13821	0.262851	0.00407886	0.00396167
GOTERM_BP_DIRECT	GO:0045165~cell fate commitment	25	0.686248	4.85579e-05	TGFB1I1, PRDM1, RBPJ, SOX2, WNT11, HEY2, KDR, SOX8, HES1, SOX6, WNT2, SOX5, WNT4, MEF2C, EYA1, MITF, WNT9A, WNT16, GDF7, BMP4, BMP2, TAL1, SPRY2, PPARG, FGFR2	2634	72	18082	2.38363	0.263592	0.00407886	0.00396167
GOTERM_BP_DIRECT	GO:0034097~response to cytokine	27	0.741147	4.99456e-05	CD274, OXTR, SRF, IL6RA, TNFRSF11A, PTGS2, CORO1A, RELB, CXCL16, TMEM102, FNTA, TIMP2, ACP5, TIMP1, JUNB, JUN, XCR1, STAT1, FOS, SERPINA3G, OSMR, NFKB2, FOSL1, COL3A1, ALDH1A2, IL6ST, PTGES	2634	81	18082	2.28828	0.270003	0.00414022	0.00402127
KEGG_PATHWAY	mmu04514:Cell adhesion molecules (CAMs)	45	1.23525	5.35481e-05	NLGN3, H2-T23, CD274, CNTNAP1, CD40, H2-T22, ITGAM, SDC4, H2-Q6, H2-M3, H2-Q7, H2-K1, ICAM2, PTPRM, H2-M1, ITGAL, ICAM1, CLDN22, ALCAM, CDH3, NRCAM, ITGB7, NEO1, JAM2, CADM3, H2-T10, VCAM1, CADM1, NEGR1, ICOSL, SELE, SELP, VCAN, MAG, NFASC, CLDN15, CD28, ITGA8, CLDN19, CNTN2, SIGLEC1, CD22, NECTIN2, H2-D1, H2-AB1	1170	162	7691	1.82597	0.014882	0.000835946	0.000660427
GOTERM_CC_DIRECT	GO:0048471~perinuclear region of cytoplasm	137	3.76064	5.36564e-05	RAB3B, HFE, WWC1, CDC20, NPPB, COL4A3BP, MYC, KCNH1, PPP1R16B, MAP2K1, DGAT2, ANGEL1, CYBB, ACTN4, EML1, BTK, S100A6, PKP4, S100A4, TNIK, EZR, FKBP4, PTGES, NTM, ITPR3, NDRG1, LTBP1, RASGRP3, PKHD1, CTIF, PRDX5, STC2, PRKAR2A, CMYA5, ABL1, LPXN, MAP6, RHPN2, TPPP, ABCA1, TMEM184A, FZD5, PTCH1, CAV1, RAB3IP, PDE2A, MT2, INHBB, MT1, INHBA, SELE, EHD2, EHD3, EHD4, BCL3, FAT1, SPIRE2, FGFR1OP, NOX4, …	2814	692	19662	1.38331	0.0427374	0.00121323	0.00113275
GOTERM_BP_DIRECT	GO:0035023~regulation of Rho protein signal transduction	26	0.713698	5.59865e-05	ARHGEF26, ARHGEF25, ARHGEF10L, FGD2, FGD3, PREX2, MCF2L, EPS8L1, EPS8L2, ARHGEF40, PLEKHG3, FARP2, ARHGEF10, PLEKHG4, PLEKHG2, ARHGEF37, ARHGEF15, PLEKHG5, PLEKHG6, VAV1, TIAM2, ARHGEF3, ARHGEF4, ARHGEF7, NGEF, ARHGEF5	2634	77	18082	2.318	0.297269	0.00458071	0.00444911
GOTERM_BP_DIRECT	GO:0001934~positive regulation of protein phosphorylation	48	1.3176	6.06098e-05	CSF1R, SEMA7A, CD40, RALB, FLT4, CXCR4, AKAP6, PRR5L, AKAP5, PIK3R1, RASGRP1, FGF2, AIF1, EGFR, C3, PAK1, CCND2, EDNRB, MPRIP, ABL1, KDR, MAP2K6, FZD1, EPHA7, SEMA4D, ANXA2, LRRN3, SPHK1, RARRES2, IL34, HSPA2, MIF, NGF, MMP9, VEGFA, RGMA, HIPK2, BMP4, GPRC5B, BMP2, FLT3L, FAM20A, TNIK, AGRN, GAS6, OGT, PTPN5, TLR3	2634	184	18082	1.79083	0.317446	0.00489541	0.00475476
GOTERM_CC_DIRECT	GO:0016324~apical plasma membrane	74	2.03129	6.19922e-05	CNTFR, OXTR, KCNC2, SLC23A1, PTPRO, SLC2A1, TRF, PTH1R, TCIRG1, AQP5, SLC4A2, GJA1, UPK1B, SLC22A18, C1QTNF5, FAM65B, MFSD4B1, SLC39A4, PDGFRB, AMN, PRKAB2, ANXA1, IGFBP2, SHROOM3, LMO7, ATP1B1, OSMR, NAALADL1, SLC5A7, MFRP, KCNMA1, TNIK, ATP6V0D1, EZR, ATP6V1B1, SLC22A4, KCNA1, ABCB4, STXBP2, STC1, IL6RA, NOD1, LRP2, THY1, CLCN3, DLL1, EGFR, PKHD1, DPP4, SLC9A3R2, ADGRG2, PDPN, DRAM2, ABCB1A, AB…	2814	328	19662	1.57638	0.0492111	0.00134511	0.00125588
GOTERM_CC_DIRECT	GO:0005829~cytosol	312	8.56437	6.2794e-05	CDA, ERRFI1, PITPNA, HSF2BP, ABCA12, ACTB, SOX2, ZFYVE28, GJA1, RPS6KA6, PNP, NAMPT, CHAC1, DUS4L, HERC6, ATG3, PRKAB2, MEF2C, DAPK1, UNC5B, CMBL, FNDC3A, EML1, RUFY1, CARHSP1, SFRP1, OMP, DDIT4, IGTP, BTK, TXNIP, ACOT1, SIK1, PRKD1, ACOT6, EZR, NGEF, CRABP1, STXBP2, HSPA4L, AKR1C18, PIK3R1, THY1, HIF1A, ACMSD, PRDX5, RNF213, INPP5D, PDGFC, PLCG2, SFN, PIP5K1C, PPARGC1A, GSDMD, STAT5A, JUN, DMPK,…	2814	1784	19662	1.22198	0.0498315	0.00134511	0.00125588
GOTERM_BP_DIRECT	GO:0043066~negative regulation of apoptotic process	117	3.21164	6.29141e-05	IL1RN, SCX, IFIT3, COMP, EDNRB, CCND2, FNTA, PIM1, KDR, PIM3, SOX8, IER3, PDGFRB, MSX2, DAPK1, HGF, MITF, MIF, BTC, SFRP1, PGR, PSMD10, PTGFR, CSF1R, PIK3R1, HIF1A, PLAC8, PKHD1, SOCS3, PRDX5, CHST11, MICAL1, STAT5A, NGFR, PRNP, TGFB2, JUN, EGR3, RHBDD1, FN1, ASNS, DHCR24, IGF1, SMAD6, BMP4, IL6, NR4A3, BCL6, KITL, BCL3, ID1, PDE3A, MDM4, LHX4, ADA, AVEN, FLT4, FHL2, SLC40A1, ILK, ADAR, FMN2, GLI…	2634	566	18082	1.41906	0.327285	0.0050172	0.00487305
KEGG_PATHWAY	mmu05205:Proteoglycans in cancer	53	1.45484	6.49309e-05	ITGB5, HSPB2, FGF2, ACTB, ACTG1, PLAU, MYC, KDR, TIMP3, MAP2K1, HGF, ITGA2, WNT9A, WNT16, MMP9, DCN, PPP1R12B, EZR, MET, TLR2, ROCK1, SDC4, PIK3R3, ITPR3, PIK3R1, IQGAP1, HIF1A, THBS1, EGFR, PIK3R5, PAK1, WNT11, GPC3, PLCG2, FLNA, WNT2, CAMK2G, WNT4, FZD1, FZD3, TGFB2, FZD2, FZD5, PTCH1, CAV1, FZD6, FN1, IGF1, MAPK13, VEGFA, TFAP4, FAS, HPSE	1170	203	7691	1.71624	0.018017	0.000960294	0.000758666
GOTERM_BP_DIRECT	GO:0048754~branching morphogenesis of an epithelial tube	16	0.439198	7.18493e-05	SEMA5A, LAMA5, IGF1, PKD1, VEGFA, GLI2, GDF7, BMP4, MMP14, PAK1, MYCN, MGP, KDR, SPRY2, MET, WNT4	2634	36	18082	3.05104	0.364116	0.00565814	0.00549558
GOTERM_BP_DIRECT	GO:0051496~positive regulation of stress fiber assembly	18	0.494098	7.57798e-05	ARHGEF10, SDC4, ARHGEF15, TGFB3, GPR65, FHOD1, TPM1, ARHGEF10L, SORBS3, PPM1E, PAK1, RGCC, WNT11, KISS1R, NOX4, EPHA1, ARHGEF5, WNT4	2634	44	18082	2.80835	0.379672	0.00589399	0.00572465
GOTERM_MF_DIRECT	GO:0005160~transforming growth factor beta receptor binding	18	0.494098	8.27174e-05	GDF10, TGFB2, RASL11B, GDF15, TGFB3, INHBB, GDF3, INHBA, GDF6, BMP6, BMP5, GDF7, TGFBR3, BMP4, BMP3, BMP2, LRG1, GDNF	2559	44	17446	2.78898	0.137844	0.00741562	0.00726259
GOTERM_CC_DIRECT	GO:0030027~lamellipodium	43	1.18035	9.22527e-05	ROCK1, CTNND1, STXBP2, DYSF, PDXP, PTPRM, ILK, GDPD2, PPP1R9A, AIF1, CORO1A, ACTG2, MYLK, DPP4, ABLIM1, PAK1, PTPRZ1, MCF2L, PDPN, DAG1, PTK2B, SH3BGRL3, MYH10, GSN, MYO10, PLEKHG5, RAB3IP, TRPV2, SORBS2, PARVA, PARVB, ARPC5, SRCIN1, TIAM2, ACTA2, APBB1IP, ACTA1, PALLD, KITL, FSCN1, FAT1, ARHGEF7, MYO1G	2814	164	19662	1.83201	0.0723466	0.00192548	0.00179774
GOTERM_MF_DIRECT	GO:0001968~fibronectin binding	14	0.384299	9.45088e-05	LRRC15, SDC4, IGFBP5, ITGA3, IGFBP3, TNC, FBLN1, SSC5D, THBS1, MMP9, VEGFA, COMP, MMP13, CCDC80	2559	29	17446	3.29121	0.155881	0.00806925	0.00790273
KEGG_PATHWAY	mmu04270:Vascular smooth muscle contraction	37	1.01565	9.76338e-05	MYLK2, GUCY1B3, CALCRL, ROCK1, ADRA1D, ITPR3, CACNA1C, ADCY1, ADRA1B, ADCY8, ADCY7, ACTG2, ADCY5, MYLK, GNA11, KCNMB1, KCNMB4, PRKG1, GUCY1A3, GUCY1A2, PPP1R14A, PTGIR, MAP2K1, PLA2G2E, PLA2G4C, PLA2G4A, AGTR1B, ACTA2, MYL6, ADORA2B, KCNMA1, MRVI1, CALM1, PPP1R12B, RAMP1, PLCB2, MYL9	1170	127	7691	1.91512	0.0269685	0.00137176	0.00108374
GOTERM_BP_DIRECT	GO:0035556~intracellular signal transduction	87	2.38814	0.00010166	DGKG, GUCY1B3, HSPB1, PRKAG2, PREX2, NRBP2, RPS6KA3, RPS6KA6, RPS6KA5, MCF2L, JAK2, SH2D6, RGS9, STK32B, STK32C, RGS6, TNS1, RGS7, PDGFRB, GUCY1A3, GUCY1A2, UNC13A, IGFBP5, WSB2, DAPK1, DUSP1, NFAM1, HUNK, VAV1, TGFBR3, TIAM2, RASA4, ARHGEF3, BTK, ARHGEF4, SIK1, TNIK, PRKD1, SGK1, ARHGEF7, SCG2, PLCB2, ARHGEF5, GUCY2E, ROCK1, RGS14, CCDC68, AKAP6, NOD1, RASAL1, ADCY1, NOD2, ADCY8, RASGRP1, ADCY7,…	2634	400	18082	1.4931	0.473021	0.00781048	0.00758608
GOTERM_BP_DIRECT	GO:0045907~positive regulation of vasoconstriction	18	0.494098	0.000105381	OXTR, CAV1, F2R, NPY1R, ADRA1D, HTR2A, SMAD6, PTGS2, ADRA1B, EGFR, ICAM1, PTGS1, GJA1, TBXA2R, GJA5, ABL1, CD38, PDE5A	2634	45	18082	2.74594	0.485233	0.00799617	0.00776644
GOTERM_BP_DIRECT	GO:0010595~positive regulation of endothelial cell migration	17	0.466648	0.000106616	ANGPT4, CCBE1, FOXC2, ANGPT1, FLT4, THBS1, FGF2, AGT, VEGFA, FOXP1, BMP4, ADGRA2, ZC3H12A, ATOH8, KDR, PTK2B, PRKD1	2634	41	18082	2.8464	0.489222	0.00799617	0.00776644
KEGG_PATHWAY	mmu04550:Signaling pathways regulating pluripotency of stem cells	39	1.07055	0.000124209	RIF1, DLX5, PIK3R3, PIK3R1, ACVR1B, FGF2, PIK3R5, SOX2, WNT11, ACVR1C, MYC, JAK2, WNT2, WNT4, FZD1, ZFHX3, MAP2K1, FZD3, FZD2, FZD5, PCGF5, FZD6, LIF, SMAD9, INHBB, IGF1, INHBA, WNT9A, WNT16, DUSP9, TBX3, MAPK13, BMP4, BMP2, ID1, ID4, ID3, IL6ST, FGFR2	1170	138	7691	1.85773	0.0341829	0.00166204	0.00131307
GOTERM_BP_DIRECT	GO:0043410~positive regulation of MAPK cascade	31	0.850947	0.000127614	CD40, WWC1, FLT4, ILK, TNFRSF11B, NOD2, TNFRSF11A, ADRA1B, SOX2, C1QTNF1, FGF9, KDR, TIMP2, TNFRSF14, NGFR, IGFBP4, IGFBP3, F2R, DAB2IP, OSM, LIF, IGF1, SORBS3, SSTR4, AGT, IL6, BMP2, ADRB3, FAS, LAMTOR1, FGFR2	2634	104	18082	2.04625	0.55253	0.00945843	0.00918669
KEGG_PATHWAY	mmu05166:HTLV-I infection	66	1.81169	0.000133235	NRP1, H2-T23, CD40, H2-T22, SPI1, H2-K1, SLC2A1, ITGAL, ICAM1, POLB, CDC20, PPP3CA, CCND2, MYC, PDGFRB, PDGFRA, IL15RA, H2-T10, MSX2, IL1R1, IL1R2, FOS, WNT9A, WNT16, LCK, TLN2, TLN1, H2-D1, SRF, H2-Q6, H2-M3, H2-Q7, PIK3R3, H2-M1, PIK3R1, ADCY1, IL2RG, ADCY8, ADCY7, ADCY5, PIK3R5, RELB, WNT11, POLD1, WNT2, WNT4, FZD1, STAT5A, FDPS, FZD3, CDKN2B, TGFB2, JUN, FZD2, VCAM1, FZD5, CDKN2A, TGFB3, FZD6…	1170	276	7691	1.57192	0.0366209	0.00170177	0.00134446
GOTERM_BP_DIRECT	GO:0050873~brown fat cell differentiation	15	0.411749	0.000145356	CEBPA, CEBPB, LAMB3, PEX11A, RARRES2, BNIP3, ADRB1, PTGS2, ERO1L, PLAC8, SELENBP1, ARL4A, LRG1, ADRB3, PPARG	2634	34	18082	3.02861	0.599866	0.0106482	0.0103423
KEGG_PATHWAY	mmu05133:Pertussis	25	0.686248	0.000150838	C1QB, C4BP, C1QA, ITGAM, NOD1, CXCL5, C2, PYCARD, C3, C4B, C1S2, C1S1, CASP1, CD14, JUN, C1RA, NOS2, FOS, MAPK13, IL6, IRF1, SERPING1, HC, CALM1, C1QC	1170	74	7691	2.22078	0.0413582	0.00184285	0.00145591
GOTERM_BP_DIRECT	GO:0006937~regulation of muscle contraction	12	0.329399	0.000151189	RYR1, MYLK2, HSPB6, TNNC1, TNNT2, KCNA1, TNNT3, CASQ2, TNNI2, ATP1A2, CASQ1, ADRA1B	2634	23	18082	3.58166	0.614307	0.0109482	0.0106336
GOTERM_BP_DIRECT	GO:0006887~exocytosis	31	0.850947	0.000154102	EXOC3L2, EXOC3L4, STXBP2, TNFAIP2, RIMS2, PAK1, SCRN1, CCL3, PIP5K1C, STXBP6, MYH10, CCR1, ARFGEF2, UNC13A, EXOC8, KCNB1, LGI3, MICAL3, RAB27A, SYTL5, SRCIN1, SYT7, SYT17, HCK, EXOC4, HAP1, EXOC3L, VAMP4, VAMP5, MYO1G, LLGL2	2634	105	18082	2.02676	0.621324	0.0110323	0.0107154
GOTERM_BP_DIRECT	GO:0030334~regulation of cell migration	25	0.686248	0.000160406	LAMA5, LAMA1, LAMA3, NEXN, CXCR4, THY1, RTN4, TMSB4X, LMNA, PLXNA2, ENPP2, PTK2B, FLNA, PLXNC1, PITX2, PLXNA4, LMO4, DDX58, RCC2, MMP3, UNC5C, SRCIN1, MMP10, EPHA3, VCL	2634	77	18082	2.22885	0.636073	0.0113546	0.0110284
GOTERM_BP_DIRECT	GO:0051592~response to calcium ion	23	0.631348	0.000162405	APOBEC1, TPH2, RYR2, PDE1C, DUSP1, CAV1, TRPC1, ANXA5, PLA2G4A, ITPR3, THBS1, EGFR, NPPB, PPP3CA, IL6, TNNT2, KCNMB1, KCNMA1, PENK, TXNIP, PTK2B, CYTB, PTGES	2634	68	18082	2.32193	0.640628	0.0113683	0.0110417
GOTERM_BP_DIRECT	GO:0070098~chemokine-mediated signaling pathway	20	0.548998	0.000170143	CCR1, CXCL9, CCL11, GPR35, CXCL1, CXCL3, CXCL2, CXCL5, CX3CL1, CCL9, CCL8, CCL7, CCL6, CCL4, CCL3, CCL2, ACKR3, PTK2B, CCL17, PF4	2634	55	18082	2.49631	0.657733	0.0117791	0.0114407
GOTERM_CC_DIRECT	GO:0005913~cell-cell adherens junction	70	1.92149	0.000177263	OXTR, CTNND1, ARHGAP1, PTPRM, TGM1, CDH3, MPRIP, PPP1R13L, RARS, BSG, DAG1, TNKS1BP1, HIST2H3C2, TRIM25, HIST2H3C1, PGM5, MB21D2, ANXA1, ANXA2, LMO7, EPN2, TMEM2, GPRC5A, FSCN1, MYH9, TLN1, EZR, VCL, NOTCH3, AHNAK, LAMA3, ASAP1, IQGAP1, ZC3HAV1, NDRG1, PPL, EGFR, RTN4, FAM129B, CNN3, SLC9A3R2, PDLIM1, CNN2, BAG3, COBLL1, FLNA, EPS8L1, SFN, EPS8L2, STXBP6, HIST1H3B, PDLIM5, HIST1H3D, CADM3, CADM4,…	2814	316	19662	1.5478	0.134376	0.00360731	0.003368
KEGG_PATHWAY	mmu04921:Oxytocin signaling pathway	41	1.12545	0.000177596	RYR1, RYR2, MYLK2, GUCY1B3, OXTR, ROCK1, PRKAG2, ITPR3, CACNA1C, ADCY1, PTGS2, ADCY8, ADCY7, ACTB, EGFR, ADCY5, MYLK, ACTG1, PPP3CA, CD38, CAMK2G, KCNJ2, GUCY1A3, GUCY1A2, PRKAB2, MAP2K1, JUN, MEF2C, KCNJ12, KCNJ14, PLA2G4C, PLA2G4A, NFATC2, FOS, CACNB2, MYL6, CAMK4, CALM1, PPP1R12B, PLCB2, MYL9	1170	150	7691	1.79676	0.048515	0.00207936	0.00164277
GOTERM_CC_DIRECT	GO:0008076~voltage-gated potassium channel complex	25	0.686248	0.000189557	KCNG3, CNTNAP1, KCNC2, KCNA1, KCNA3, KCNA4, KCNA5, KCNA7, DPP6, KCNT2, KCNMB1, KCNMB4, KCNE1L, KCNJ2, KCNH1, KCNF1, KCND3, KCNB1, ABCC9, KCNAB1, KCNS1, KCNMA1, CNTN2, KCNQ5, CALM1	2814	79	19662	2.21114	0.142997	0.0037634	0.00351374
GOTERM_CC_DIRECT	GO:0016459~myosin complex	19	0.521548	0.000194605	MYH7B, MYO10, CCDC102A, MYL4, MYO1D, MYO1E, MYH1, MYL6, MYO1B, MYL7, MYO1C, MYH14, MYH9, MYH11, MYO1H, MYH10, MYL9, MYO1F, MYO1G	2814	52	19662	2.55302	0.146512	0.00377162	0.00352142
KEGG_PATHWAY	mmu05164:Influenza A	45	1.23525	0.000208411	OAS1A, PIK3R3, OAS1B, ADAR, PIK3R1, ACTB, ACTG1, PIK3R5, ICAM1, OAS1G, PYCARD, IFIH1, SOCS3, NXF2, CASP1, CCL2, TRIM25, JAK2, IKBKE, MAP2K6, IVNS1ABP, MAP2K3, IFNAR2, IL33, FDPS, MAP2K1, JUN, RSAD2, STAT1, DDX58, MX2, STAT2, HSPA2, MAPK13, NFKBIA, IL6, OAS2, OAS3, IRF7, FAS, TLR3, IRF9, HSPA1B, IFNAR1, H2-AB1	1170	171	7691	1.72987	0.0566908	0.00234254	0.00185069
GOTERM_BP_DIRECT	GO:0030199~collagen fibril organization	16	0.439198	0.000210852	FOXC2, TGFB2, ANXA2, COL14A1, SCX, DPT, GREM1, ACAN, ADAMTS14, COL3A1, COL2A1, SFRP2, COL5A1, CYP1B1, MKX, FMOD	2634	39	18082	2.81635	0.735183	0.0144388	0.0140239
GOTERM_BP_DIRECT	GO:0090090~negative regulation of canonical Wnt signaling pathway	30	0.823497	0.000216075	DRAXIN, PTPRO, CTNND1, JADE1, NKD1, D930015E06RIK, SOX2, WNT11, FRZB, WIF1, GPC3, DACT3, SOST, WNT4, ANKRD6, CTHRC1, TLE2, CAV1, FZD6, DAB2IP, WNT9A, TMEM64, MCC, DKK2, DKK3, GREM1, SFRP4, SFRP1, BMP2, SFRP2	2634	102	18082	2.01907	0.743759	0.0146373	0.0142168
GOTERM_CC_DIRECT	GO:0043235~receptor complex	36	0.988197	0.000226603	DDR1, NOTCH3, VIPR1, ITGB5, RNMT, FLT4, IL4RA, GRIK1, ITPR3, LRP2, VLDLR, PTH1R, ACVR1B, EGFR, TM7SF2, COL10A1, OLR1, ITGB7, ITGB6, LDLR, ITGA3, NTRK3, TRPC1, NR1H3, GFRA1, PLXDC1, TSHR, TGFBR3, PTPRB, ADRB3, P2RX3, GDNF, TAOK2, ROR1, KCTD12, RAMP1	2814	134	19662	1.87716	0.16846	0.00428965	0.00400508
KEGG_PATHWAY	mmu05150:Staphylococcus aureus infection	19	0.521548	0.000232183	C1QB, C1QA, C1RA, ITGAM, C5AR1, ITGAL, C2, ICAM1, C3, C4B, SELP, C1S2, C1S1, FCGR4, HC, FCGR2B, CFB, C1QC, H2-AB1	1170	50	7691	2.49793	0.06295	0.00248666	0.00196455
KEGG_PATHWAY	mmu04610:Complement and coagulation cascades	25	0.686248	0.000238932	C1QB, C4BP, C1QA, C5AR1, PLAT, C2, C3, C4B, THBD, C1S2, C1S1, CD59A, PLAU, BDKRB2, BDKRB1, CD55, C1RA, F2R, F5, F8, SERPING1, HC, CD46, CFB, C1QC	1170	76	7691	2.16234	0.0647196	0.00248666	0.00196455
GOTERM_BP_DIRECT	GO:0030041~actin filament polymerization	12	0.329399	0.000242507	GSN, CATIP, COBLL1, ABL1, WAS, COBL, MYH9, ARPC4, AIF1, MTSS1, MSRB1, GAS7	2634	24	18082	3.43242	0.783079	0.0161388	0.0156751
GOTERM_BP_DIRECT	GO:0007157~heterophilic cell-cell adhesion via plasma membrane cell adhesion molecules	19	0.521548	0.000243362	COLEC10, CADM3, CADM4, VCAM1, CXADR, CADM1, CADM2, MCAM, AMIGO2, ITGAL, SELE, PTPRD, SELP, ALCAM, DCHS1, FAT4, SCARF2, CD200, NECTIN2	2634	52	18082	2.50831	0.784245	0.0161388	0.0156751
GOTERM_CC_DIRECT	GO:0002102~podosome	14	0.384299	0.000245812	SVIL, GSN, VCAM1, WDR1, ASAP1, ACTB, SH3PXD2A, BIN2, PALLD, FSCN1, LPXN, LCP1, ARHGEF5, VCL	2814	32	19662	3.0569	0.181364	0.00454753	0.00424585
GOTERM_BP_DIRECT	GO:0050727~regulation of inflammatory response	21	0.576448	0.000259728	SEMA7A, ANXA1, AHSG, IL1R1, NOD2, ADAMTS12, SLC7A2, AGT, PYCARD, MAS1, SBNO2, IL1RL2, BCL6, TNIP1, FANCD2, DUOXA1, CASP4, CASP1, JAK2, MGLL, BIRC2	2634	61	18082	2.36331	0.80539	0.0168412	0.0163573
GOTERM_BP_DIRECT	GO:0001658~branching involved in ureteric bud morphogenesis	18	0.494098	0.000262865	LAMA5, FOXD1, EYA1, PTCH1, TCF21, ILK, FGF2, AGT, GREM1, BMP4, BMP2, GDNF, WT1, MYC, GPC3, DCHS1, FAT4, WNT4	2634	48	18082	2.57432	0.8092	0.0168412	0.0163573
GOTERM_BP_DIRECT	GO:0060048~cardiac muscle contraction	18	0.494098	0.000262865	MAP2K3, RYR2, TNNC1, TPM1, ATP1A3, CXCR4, ATP1B1, MYL4, PPP1R13L, TNNT2, CASQ2, TNNI2, KCNE1L, DMD, SCN3B, MET, SCN1B, MAP2K6	2634	48	18082	2.57432	0.8092	0.0168412	0.0163573
GOTERM_BP_DIRECT	GO:0051639~actin filament network formation	8	0.219599	0.000264647	FHOD3, COBLL1, ACTN1, PLS3, COBL, ARPC5, LCP1, ESPN	2634	11	18082	4.99261	0.811332	0.0168412	0.0163573
GOTERM_MF_DIRECT	GO:0070700~BMP receptor binding	8	0.219599	0.000276606	PYCARD, BMP4, BMP3, BMP2, ACVR1C, NEO1, BMP6, BMP5	2559	11	17446	4.95819	0.391052	0.0213475	0.0209069
GOTERM_MF_DIRECT	GO:0001730~2'-5'-oligoadenylate synthetase activity	8	0.219599	0.000276606	OAS2, OAS3, OAS1A, OAS1B, OAS1C, OASL1, OAS1G, OASL2	2559	11	17446	4.95819	0.391052	0.0213475	0.0209069
GOTERM_BP_DIRECT	GO:0000122~negative regulation of transcription from RNA polymerase II promoter	141	3.87044	0.000281993	ZFP568, SPI1, HDAC10, WWC1, WWC2, PRDM1, RBPJ, SOX2, EDNRB, DACH1, FGF9, ZFP281, SOX18, MYC, HOXA7, SOX6, JUNB, MEF2C, MSX2, USP3, FST, ARID5B, SOX11, MITF, FOXP4, FOXP3, FOXP2, FOXP1, SAP30, MAF, TXNIP, SIK1, TRIB3, TAGLN3, EZR, ZFPM2, PSMD10, RSL1, DLX1, NOTCH3, TCF7, ZBTB1, HIF1A, NPAS1, HIVEP1, HIST1H3B, HOXC8, DRD3, HIST1H3D, ZBTB18, HEXIM1, CBX7, JUN, ZFHX3, CBX4, FOXF1, BCL11A, PTCH1, CAV1…	2634	729	18082	1.32777	0.83087	0.0177656	0.0172552
KEGG_PATHWAY	mmu04010:MAPK signaling pathway	60	1.64699	0.000283786	HSPB1, FGF2, FGF5, RPS6KA3, PPP3CA, FGF7, RPS6KA6, RPS6KA5, MECOM, FGF9, MYC, MAP3K8, MAP2K3, DUSP4, PDGFRB, PDGFRA, DUSP5, MAP2K1, MEF2C, DUSP3, IL1R1, DUSP1, PLA2G4C, PLA2G4A, FOS, NGF, DUSP9, MAPK8IP3, CACNB2, SRF, CACNA1C, RASGRP1, EGFR, CACNA1H, RASGRP3, RELB, PAK1, NTF3, FLNA, CD14, MAP2K6, MAP4K4, TGFB2, JUN, GADD45B, GADD45A, TGFB3, HSPA2, MAPK13, GADD45G, NFKB2, FGF14, FGF18, TAOK2, FAS,…	1170	251	7691	1.57136	0.0763955	0.00284799	0.00225002
GOTERM_MF_DIRECT	GO:0008009~chemokine activity	18	0.494098	0.000285744	CXCL9, CCL11, CXCL1, CXCL3, CXCL2, CXCL5, CX3CL1, CXCL16, CCL9, CCL8, CCL7, CCL6, CCL4, CCL3, CCL2, CCL28, CCL17, PF4	2559	48	17446	2.55657	0.400951	0.0213475	0.0209069
GOTERM_BP_DIRECT	GO:0001701~in utero embryonic development	67	1.83914	0.000287196	ACVRL1, CHD7, ADAR, PRDM1, PKD1, GLI2, TMEM100, GJA1, DNMT3L, COL4A3BP, MECOM, SOX18, MYC, MYO18B, SPEG, SOX8, PITX2, SOX6, JUNB, IFITM5, SOX5, PDGFRB, PDGFRA, MBNL1, DUSP3, TPM1, SLC30A1, MAPK8IP3, MTSS1, EPN2, FOXP1, RAD51B, TGFBR3, NCOR2, MYH9, ZFPM2, EGFL8, LY6E, ND4, HCN4, SRF, ACVR1B, ASCL2, DLL1, BCL2L11, ACVR1C, RDH10, HES1, MYH10, ZBTB18, ANGPT1, TGFB3, FOXF1, PTCH1, TIE1, RARRES2, GDF3,…	2634	299	18082	1.53828	0.836326	0.0179142	0.0173995
GOTERM_BP_DIRECT	GO:0034446~substrate adhesion-dependent cell spreading	16	0.439198	0.000292304	LAMA5, FN1, ILK, LAMB1, PARVA, SRCIN1, EFNA1, SFRP1, PEAK1, ITGA8, ABL1, ITGB7, RADIL, EPHA1, BVES, EPHB3	2634	40	18082	2.74594	0.841512	0.0179603	0.0174443
GOTERM_BP_DIRECT	GO:0006695~cholesterol biosynthetic process	14	0.384299	0.000293636	IDI1, FDPS, MVK, HMGCS1, INSIG1, DHCR24, GM38481, HSD17B7, CYP51, TM7SF2, CYB5R3, PMVK, MVD, HMGCS2	2634	32	18082	3.00337	0.842837	0.0179603	0.0174443
KEGG_PATHWAY	mmu04970:Salivary secretion	25	0.686248	0.000298033	GUCY1B3, ATP1A4, ATP1A3, ADRA1D, ADRB1, ATP1A2, ITPR3, ADCY1, AQP5, SLC4A2, ADRA1B, ADCY8, ADCY7, ADCY5, CD38, PRKG1, GUCY1A3, GUCY1A2, ATP2B4, ATP1B1, BST1, ADRB3, KCNMA1, CALM1, PLCB2	1170	77	7691	2.13425	0.0800737	0.00288784	0.0022815
GOTERM_BP_DIRECT	GO:0009968~negative regulation of signal transduction	19	0.521548	0.000318873	RGS18, RGS14, CAV1, DDIT4L, PRR5L, RGS4, RGS5, SOCS3, SOCS1, KIF26A, RGS9BP, INPP5D, DDIT4, PMEPA1, RGS22, RGS11, RGS9, RGS6, RGS7	2634	53	18082	2.46098	0.86595	0.0193164	0.0187614
GOTERM_CC_DIRECT	GO:0008305~integrin complex	12	0.329399	0.000321795	ITGAM, ITGB5, ITGA3, ITGA2, ITGA1, ITGA11, ITGA8, ITGA7, MYH9, ITGB7, ITGB6, ITGAL	2814	25	19662	3.35386	0.230476	0.00582092	0.00543476
GOTERM_BP_DIRECT	GO:0043087~regulation of GTPase activity	23	0.631348	0.000325048	DAB2IP, ARHGAP1, RASAL1, IQGAP1, RASAL3, ADAP1, RASGRP1, VAV1, RASGRP3, PYCARD, BCL6, RASA4, CHN2, CHN1, PLXNB3, EPHA1, AGRN, BVES, EPHA3, PRKG1, NGEF, ARHGEF5, EPHB3	2634	71	18082	2.22382	0.871067	0.0195029	0.0189426
KEGG_PATHWAY	mmu05323:Rheumatoid arthritis	26	0.713698	0.000329101	TNFRSF11A, TCIRG1, ITGAL, CXCL5, ICAM1, TNFSF13B, CCL3, CCL2, ACP5, TNFSF11, ATP6V0E2, ATP6V1D, ATP6V0A1, JUN, TGFB2, ANGPT1, TGFB3, MMP3, FOS, VEGFA, IL6, CD28, ATP6V0D1, ATP6V1B1, TLR2, H2-AB1	1170	82	7691	2.08428	0.0880439	0.00308258	0.00243535
GOTERM_BP_DIRECT	GO:0003150~muscular septum morphogenesis	6	0.164699	0.000344095	TGFBR3, FZD1, BMP4, VANGL2, FZD2, HEY2	2634	6	18082	6.86484	0.885653	0.0204509	0.0198634
GOTERM_BP_DIRECT	GO:0045600~positive regulation of fat cell differentiation	18	0.494098	0.000348441	CEBPA, CEBPB, TPH1, RARRES2, IGF1, HTR2A, TMEM64, ZFP36L1, SFRP1, BMP2, SFRP2, WIF1, FRZB, ZC3H12A, PPARG, CCDC3, AAMDC, CMKLR1	2634	49	18082	2.52178	0.888743	0.0205157	0.0199263
KEGG_PATHWAY	mmu05202:Transcriptional misregulation in cancer	43	1.18035	0.000369172	CSF1R, CEBPA, CEBPB, CD40, SPI1, ITGAM, PLAT, LYL1, CCND2, PLAU, MYC, NFKBIZ, HIST2H3C2, ITGB7, HIST2H3C1, BCL2A1D, CD14, HIST1H3B, HIST1H3D, NGFR, MEF2C, JUP, EYA1, IGFBP3, IL1R2, LMO2, MMP3, ETV1, IGF1, TRAF1, WNT16, MMP9, IL6, NR4A3, MAF, MYCN, BCL6, WT1, PPARG, ERG, NUPR1, MET, CDK14	1170	165	7691	1.7131	0.0982223	0.00334637	0.00264375
GOTERM_BP_DIRECT	GO:0006919~activation of cysteine-type endopeptidase activity involved in apoptotic process	22	0.603898	0.000370229	NGFR, NLRP1B, EGLN3, HIP1, CDKN2A, STAT1, TNFSF15, F2R, HIP1R, NOD1, ACER2, PYCARD, DAP, FAM162A, LCK, P2RX1, MYC, PMAIP1, PPARG, JAK2, XDH, BOK	2634	67	18082	2.25413	0.903019	0.0214836	0.0208664
GOTERM_BP_DIRECT	GO:0007519~skeletal muscle tissue development	20	0.548998	0.000371701	ZBTB18, SVIL, MEF2C, MBNL1, CAV1, ELN, KCNAB1, COL19A1, DCN, FOXP2, FOXP1, PDLIM3, MYL6, MYH14, DMD, CASQ1, PITX2, MET, VAMP5, BVES	2634	58	18082	2.36719	0.903915	0.0214836	0.0208664
GOTERM_BP_DIRECT	GO:0048010~vascular endothelial growth factor receptor signaling pathway	12	0.329399	0.000376321	NRP1, FOXC2, FLT4, KDR, VEGFC, CCL2, PTK2B, VEGFD, PIK3R1, PRKD1, VAV1, VEGFA	2634	25	18082	3.29513	0.906673	0.0215529	0.0209337
GOTERM_MF_DIRECT	GO:0042056~chemoattractant activity	12	0.329399	0.000400011	BMP4, FGF7, SAA3, HGF, NTF3, CCL3, VEGFC, VEGFD, MIF, FGF2, SCG2, VEGFA	2559	25	17446	3.2724	0.511962	0.0286888	0.0280967
GOTERM_BP_DIRECT	GO:0043536~positive regulation of blood vessel endothelial cell migration	10	0.274499	0.000404461	STAT5A, ANGPT4, ANGPT1, HSPB1, VEGFC, PRKD1, THBS1, PRL2C2, FGF2, VEGFA	2634	18	18082	3.8138	0.921842	0.0223552	0.021713
GOTERM_BP_DIRECT	GO:0048566~embryonic digestive tract development	10	0.274499	0.000404461	TGFB2, FGF9, FOXF2, FOXF1, ALDH1A2, RARRES2, RARB, PCSK5, ADA, GLI2	2634	18	18082	3.8138	0.921842	0.0223552	0.021713
GOTERM_BP_DIRECT	GO:0042472~inner ear morphogenesis	23	0.631348	0.000404523	FZD3, EYA1, PTPRQ, DLX5, INSIG1, FZD6, PRRX2, CHD7, DLL1, SOX2, ALDH1A3, TMIE, NR4A3, MAFB, COL2A1, FGF9, FRZB, ITGA8, CDH23, SPRY2, EPHB2, FGFR2, ATP6V1B1	2634	72	18082	2.19294	0.921873	0.0223552	0.021713
GOTERM_BP_DIRECT	GO:0016525~negative regulation of angiogenesis	23	0.631348	0.000404523	CX3CR1, NGFR, ANGPT4, SEMA4A, ANGPT2, ROCK1, STAT1, TIE1, ECSCR, DAB2IP, LIF, PTPRM, THBS2, THBS1, AGT, DCN, RGCC, CD59A, ADGRB2, COL4A2, TNMD, CCL2, PF4	2634	72	18082	2.19294	0.921873	0.0223552	0.021713
GOTERM_BP_DIRECT	GO:0002040~sprouting angiogenesis	13	0.356849	0.00040908	NRP1, CCBE1, ANGPT1, FLT4, PARVA, THBS1, VEGFA, RNF213, ADGRA2, CDH13, RSPO3, PTK2B, PRL2C2	2634	29	18082	3.07734	0.924085	0.0224105	0.0217666
GOTERM_BP_DIRECT	GO:0043406~positive regulation of MAP kinase activity	19	0.521548	0.000413918	PDGFRB, MEF2C, CD40, ILK, HTR2A, MIF, MST1R, IQGAP1, RASGRP1, FGF2, EGFR, VEGFA, PIK3R5, KITL, PDGFC, FGF18, TNFSF11, NOX4, PDE5A	2634	54	18082	2.41541	0.926365	0.02248	0.0218342
GOTERM_CC_DIRECT	GO:0031594~neuromuscular junction	21	0.576448	0.000419321	ACHE, EPHA7, POSTN, UNC13A, F2R, SYNGR3, PPP1R9A, SYNGR4, COLQ, DES, PCLO, ITGA7, MYH9, NEFM, KCNN3, UTRN, SYNC, MYH10, PDZRN3, RAPSN, SNTA1	2814	64	19662	2.29268	0.289225	0.00742016	0.00692792
GOTERM_MF_DIRECT	GO:0004714~transmembrane receptor protein tyrosine kinase activity	19	0.521548	0.000450594	PDGFRB, DDR1, PDGFRA, CSF1R, EPHA7, NTRK3, FLT4, TIE1, MST1R, EGFR, KDR, ROR1, EPHA1, EPHB2, EPHB1, MET, FGFR2, EPHA3, EPHB3	2559	54	17446	2.39875	0.554294	0.0310736	0.0304324
GOTERM_BP_DIRECT	GO:0007189~adenylate cyclase-activating G-protein coupled receptor signaling pathway	18	0.494098	0.000457076	PTGFR, PTGIR, CALCRL, PTGER1, PTGER2, ADRB1, ADCY1, PTH1R, ADCY8, ADCY7, TSHR, ADCY5, ADRB3, TBXA2R, ADORA2B, ADM2, DRD1, DRD5	2634	50	18082	2.47134	0.943904	0.0246118	0.0239047
GOTERM_BP_DIRECT	GO:0010629~negative regulation of gene expression	60	1.64699	0.000465163	ACVRL1, SNX12, PTPN22, PRDM1, PPP3CA, TRIM6, GJA1, ZFP281, HEY1, MYC, ZC3H12A, HEY2, TGIF1, MAP2K1, MEF2C, SFMBT2, PAWR, SOX11, MIF, UPK3B, FOXP3, TGFBR3, OLFM1, SFRP1, MYCN, SFRP2, PGR, CD46, MET, CRYAB, PLAG1, ZFP503, ACVR1B, AIF1, STC2, CCL3, HES1, GAS2L1, XDH, TRP53COR1, LDLR, WNT4, CCR1, TGFB2, ACE, NOS2, BCL11A, MBD1, WWP2, IGF1, VEGFA, PARP10, BMP4, HEYL, H19, BMP2, TFAP4, ID1, CD28, ID3	2634	265	18082	1.5543	0.946692	0.024835	0.0241215
GOTERM_BP_DIRECT	GO:0006956~complement activation	9	0.247049	0.000492666	C3, C4B, C1S2, C1RA, RGCC, C1S1, HC, CFB, C2	2634	15	18082	4.11891	0.955178	0.0260823	0.025333
GOTERM_MF_DIRECT	GO:0004713~protein tyrosine kinase activity	33	0.905847	0.000500423	DDR1, CSF1R, DYRK3, FLT4, TESK1, AATK, MST1R, EGFR, ABL1, KDR, PTK2B, JAK2, EPHB2, EPHB1, EPHB3, MAP2K6, MAP2K3, PDGFRB, PDGFRA, EPHA7, MAP2K1, TIE1, NTRK3, D8ERTD82E, HCK, TEC, PEAK1, LCK, BTK, EPHA1, MET, EPHA3, FGFR2	2559	121	17446	1.85932	0.592405	0.0330988	0.0324158
GOTERM_BP_DIRECT	GO:0031668~cellular response to extracellular stimulus	11	0.301949	0.000506547	NR4A2, GSDMD, FOSL1, CDKN2B, SFRP2, ADORA2B, SLC1A2, FOS, AIF1, ASGR1, BMP6	2634	22	18082	3.43242	0.958933	0.0265937	0.0258297
GOTERM_BP_DIRECT	GO:0006813~potassium ion transport	34	0.933297	0.000512885	HCN4, KCNG3, SLC24A3, KCNC2, KCNA1, ATP1A4, KCNA3, ATP1A3, KCNA4, ATP1A2, KCNA5, KCNA7, KCNT2, KCNMB1, GJA5, KCNMB4, KCNN3, KCNJ2, KCNH1, KCNF1, SLC12A5, KCNJ12, KCND3, KCNB1, KCNJ14, KCNK13, KCNJ15, ABCC9, KCNAB1, ATP1B1, KCNS1, KCNMA1, KCNQ5, KCNK3	2634	127	18082	1.83783	0.960542	0.026704	0.0259367
GOTERM_MF_DIRECT	GO:0005161~platelet-derived growth factor receptor binding	9	0.247049	0.000516881	PDGFRB, ERN1, PDGFRA, IL1R1, PDGFC, PTPRJ, VEGFD, PIK3R1, VEGFA	2559	15	17446	4.0905	0.604264	0.0330988	0.0324158
GOTERM_BP_DIRECT	GO:0051091~positive regulation of sequence-specific DNA binding transcription factor activity	30	0.823497	0.000520619	SRF, TNFRSF11A, PYCARD, TRIM8, PPP3CA, TRIM25, TNFSF11, JAK2, PPARGC1A, WNT2, TRIM21, FZD1, MYOCD, FZD2, JUP, CDKN2A, NFAM1, IFRD1, ARID5B, NGF, MID2, HIPK2, FOSL1, IL6, RGCC, TRAF5, TRIM14, PPARG, PLPP3, ARHGEF5	2634	107	18082	1.92472	0.96242	0.026713	0.0259456
GOTERM_BP_DIRECT	GO:0002485~antigen processing and presentation of endogenous peptide antigen via MHC class I via ER pathway, TAP-dependent	7	0.192149	0.000535304	ABCB4, H2-K1, TAP1, ABCB9, ABCB1A, ABCB1B, H2-D1	2634	9	18082	5.33932	0.965743	0.026713	0.0259456
GOTERM_BP_DIRECT	GO:0060426~lung vasculature development	7	0.192149	0.000535304	ERRFI1, FOXF1, ID1, LIF, TCF21, IGF1, VEGFA	2634	9	18082	5.33932	0.965743	0.026713	0.0259456
GOTERM_BP_DIRECT	GO:0044406~adhesion of symbiont to host	7	0.192149	0.000535304	GBP6, GBP7, GBP9, GBP2, NECTIN2, ICAM1, GBP3	2634	9	18082	5.33932	0.965743	0.026713	0.0259456
GOTERM_BP_DIRECT	GO:0002481~antigen processing and presentation of exogenous protein antigen via MHC class Ib, TAP-dependent	7	0.192149	0.000535304	ABCB4, H2-M3, TAP1, ABCB9, ABCB1A, B2M, ABCB1B	2634	9	18082	5.33932	0.965743	0.026713	0.0259456
GOTERM_BP_DIRECT	GO:0030155~regulation of cell adhesion	16	0.439198	0.000538501	STAT5A, LAMA5, GSN, LAMA1, SRF, LAMA3, LMO7, PTPRJ, PKD1, DLL1, ICAM1, NUAK1, S1PR1, PTK2B, SERPINI1, JAK2	2634	42	18082	2.61518	0.966426	0.026713	0.0259456
GOTERM_BP_DIRECT	GO:0035455~response to interferon-alpha	8	0.219599	0.00055517	IFNAR2, IFITM3, BST2, TGTP2, PLSCR1, IFITM1, IFITM2, ADAR	2634	12	18082	4.57656	0.969775	0.0273248	0.0265397
GOTERM_BP_DIRECT	GO:0045662~negative regulation of myoblast differentiation	12	0.329399	0.000566961	BMP4, CCL9, IL1F9, ID3, SOX8, GDF3, MKX, MBNL3, CCL17, PRL2C2, DLL1, TBX3	2634	26	18082	3.16839	0.971941	0.0276888	0.0268933
GOTERM_BP_DIRECT	GO:0030593~neutrophil chemotaxis	22	0.603898	0.00057556	TGFB2, CCL11, ITGAM, CSF3R, CXADR, ITGA1, C5AR1, CXCL1, CXCL3, CXCL2, VAV1, CX3CL1, CCL9, CCL8, CCL7, CCL6, CCL4, CCL3, SPP1, PDE4B, CCL2, CCL17	2634	69	18082	2.18879	0.973421	0.0278925	0.0270912
GOTERM_CC_DIRECT	GO:0045202~synapse	100	2.74499	0.000579749	CHRM5, CTNND1, PLAT, RIMS2, C4B, DAG1, NRCAM, EPHB2, SYNPO, KCNH1, PPFIA2, UNC13A, DSCAM, UNC5C, SRCIN1, OLFM1, SLC5A7, ARC, OLFM2, MADD, SPARCL1, NSMF, KCTD12, TLN2, UTRN, NRN1, CHRNA2, SLC1A2, EFNB1, FLRT2, CDH23, SYNDIG1, ABL1, PRRT1, CADM1, HOMER2, CADM2, NETO2, SYT7, GRIN2D, SDK1, GRIN3A, SLC6A9, LRFN1, SSPN, CNTN2, IGSF9B, CPEB2, SDK2, ACHE, KCNC2, GRIK4, HSPB1, GRIK1, DOC2B, GRIK2, PPP1R9A…	2814	505	19662	1.38361	0.376279	0.0100408	0.00937466
GOTERM_MF_DIRECT	GO:0019838~growth factor binding	16	0.439198	0.000580069	NRP1, IGFBP5, IGFBP4, DUSP1, IGFBP3, FLT4, IGFBP2, PDXP, OSMR, ACVR1B, LTBP1, VEGFA, ACVR1C, KDR, IGFBP6, IL6ST	2559	42	17446	2.59715	0.646674	0.0339444	0.0332439
GOTERM_MF_DIRECT	GO:0008144~drug binding	31	0.850947	0.00058652	CHRNA2, CXCR4, GRIK1, ADRB1, ATP1A2, HTR2A, PYGL, PPP3CA, PNP, FNTA, NAMPT, DRD1, DRD3, SLC18A2, DRD4, DRD5, ACE, HMGCS1, PDE2A, ABCC9, ATP1B1, SFRP1, GLRB, GSTA4, P2RX1, FASN, FSCN1, RARB, PPARG, FOLR2, FOLR1	2559	112	17446	1.88699	0.65074	0.0339444	0.0332439
GOTERM_MF_DIRECT	GO:0005200~structural constituent of cytoskeleton	24	0.658798	0.00058688	SPTBN4, MYOM1, SYNM, MYBPC1, TPM2, TPM1, ARPC4, ARPC5, SPTB, TUBB4A, LOR, ACTG1, FRMD3, EPB41L4B, TUBB2B, DES, TUBB2A, TUBA1A, TUBB3, TNNT2, DMD, VIM, TLN2, TLN1	2559	78	17446	2.09769	0.650966	0.0339444	0.0332439
GOTERM_BP_DIRECT	GO:0001975~response to amphetamine	14	0.384299	0.000590623	OXTR, ADRA1B, HDAC9, CXCL2, ICAM1, NR4A2, PPP3CA, CNR2, DRD1, CALM1, DRD3, SLC18A2, DRD4, DRD5	2634	34	18082	2.8267	0.975829	0.0282596	0.0274477
GOTERM_BP_DIRECT	GO:0032570~response to progesterone	13	0.356849	0.000592107	TGFB2, OXTR, TGFB3, CAV1, PTGER2, NR1H3, FOS, FOSL1, GJB2, CCL2, CD38, TXNIP, TLR2	2634	30	18082	2.97477	0.976054	0.0282596	0.0274477
GOTERM_BP_DIRECT	GO:0045666~positive regulation of neuron differentiation	29	0.796047	0.000611445	GDPD5, GLI2, SOX2, DUOXA1, TIMP2, CCR5, RGS6, TGIF1, NGFR, MEF2C, TGIF2, TRPC6, IRX3, SOX11, NGF, GDF6, MAPK8IP3, BMP6, TLE6, GDF7, BMP4, HEYL, IL6, IMPACT, GPRC5B, BMP2, BCL6, RARB, NBL1	2634	103	18082	1.93282	0.978803	0.0289632	0.0281311
KEGG_PATHWAY	mmu05412:Arrhythmogenic right ventricular cardiomyopathy (ARVC)	22	0.603898	0.000642797	RYR2, JUP, ITGB5, ITGA3, ITGA2, ITGA1, TCF7, CACNA1C, ACTB, ACTG1, CACNB2, GJA1, DES, SGCA, LMNA, ITGA11, ITGA8, DAG1, ITGA7, ITGB7, DMD, ITGB6	1170	67	7691	2.15846	0.164764	0.00564456	0.0044594
GOTERM_BP_DIRECT	GO:0048146~positive regulation of fibroblast proliferation	21	0.576448	0.000660146	PDGFRB, TGIF1, PDGFRA, NGFR, CD74, JUN, ANXA2, SPHK1, FN1, IGF1, MIF, EGFR, AGT, EREG, BTC, PTPRZ1, MYC, PDGFC, ABL1, GAS6, WNT2	2634	65	18082	2.21787	0.984407	0.0308068	0.0299217
GOTERM_BP_DIRECT	GO:0018108~peptidyl-tyrosine phosphorylation	21	0.576448	0.000660146	PDGFRB, DDR1, STAT5A, PDGFRA, CSF1R, DYRK3, FLT4, EGFR, HCK, TEC, RELN, LCK, BTK, ABL1, KDR, PTK2B, SH2D1B1, JAK2, EPHA1, EPHB2, FGFR2	2634	65	18082	2.21787	0.984407	0.0308068	0.0299217
GOTERM_BP_DIRECT	GO:0007166~cell surface receptor signaling pathway	51	1.39995	0.000669807	VIPR1, VIPR2, NPY6R, PTH1R, ITGAL, TSPAN11, CELSR3, ADGRE1, UPK1B, ADGRA1, ADGRE5, ADGRA2, CD53, SEMA6A, ANXA1, GLP2R, NPY1R, MIF, OSMR, ADGRB2, LCK, ADGRF5, EPHA1, CD274, CALCRL, LAMA1, GPR88, ACVR1B, MCHR1, TSPAN33, EGFR, PROKR1, ADGRG1, ADGRG2, ADGRG6, PLXNA2, PTK2B, TSPAN2, FZD1, FZD3, FZD2, FZD5, FZD6, AGT, ARTN, CD9, OSTN, ADGRL4, FCGR2B, CD22, ADGRL3	2634	219	18082	1.59866	0.985329	0.0310278	0.0301364
GOTERM_BP_DIRECT	GO:0001764~neuron migration	33	0.905847	0.00070266	NRP1, SRF, CXCR4, NDNF, CELSR3, GJA1, RELN, CHL1, TBX20, NDN, PITX2, MYH10, NEO1, PRKG1, KIRREL3, FZD3, MEF2C, SEMA6A, ITGA3, DCC, NTRK3, GFRA3, DCLK1, NR4A2, TUBB2B, DDIT4, CNTN2, FAT3, FGF13, GAS6, MET, CDK5R2, ADGRL3	2634	124	18082	1.82693	0.988074	0.0323121	0.0313838
GOTERM_CC_DIRECT	GO:0030863~cortical cytoskeleton	13	0.356849	0.000714498	GYPC, NOS2, TRPC4, ACTN1, ACTN4, SPTB, SELE, ACTB, SPTA1, INPP5D, FLNA, MYH9, NSMF	2814	31	19662	2.93012	0.441114	0.0121167	0.0113129
GOTERM_BP_DIRECT	GO:0001974~blood vessel remodeling	16	0.439198	0.000716832	ACVRL1, FOXC2, MEF2C, TGFB2, JAG1, ANGPT2, SEMA3C, CHD7, LIF, IGF1, RBPJ, ADRA1B, VEGFA, TGFBR3, RSPO3, FLNA	2634	43	18082	2.55436	0.989093	0.0327249	0.0317847
KEGG_PATHWAY	mmu04062:Chemokine signaling pathway	48	1.3176	0.000724077	CX3CR1, CXCL9, CCL11, ROCK1, WAS, PIK3R3, CXCR4, CXCL1, PIK3R1, ADCY1, CXCL3, ADCY8, CXCL2, ADCY7, CXCL5, CX3CL1, ADCY5, PIK3R5, CXCL16, CCL9, PAK1, GNG3, CCL8, CCL7, CCL6, GNG4, GRK4, CCL4, CCL3, CCL2, PTK2B, GNG8, JAK2, CCR5, CCL17, CCR1, MAP2K1, XCR1, STAT1, STAT2, VAV1, NFKBIA, HCK, GNB5, DOCK2, CCL28, PLCB2, PF4	1170	196	7691	1.60984	0.183571	0.00616563	0.00487106
GOTERM_BP_DIRECT	GO:0071560~cellular response to transforming growth factor beta stimulus	20	0.548998	0.000754704	ACVRL1, CX3CR1, MEF2C, POSTN, CAV1, SCX, AKR1C18, ZFP36L1, SFRP1, COL4A2, PENK, ID1, PDE3A, ABL1, NOX4, SOX6, PPARGC1A, WNT2, SOX5, WNT4	2634	61	18082	2.25077	0.99141	0.034206	0.0332233
GOTERM_MF_DIRECT	GO:0005524~ATP binding	265	7.27422	0.000778428	PI4K2B, DQX1, TESK1, UBE2L6, ABCA12, ACTB, MYLK, RPS6KA3, RPS6KA6, RPS6KA5, DHX58, PDK4, KDR, CDK20, PIP4K2A, KIF21A, KIF21B, EPHB2, GLUL, EPHB1, EPHB3, MCCC2, EPHA7, DAPK1, ACSL6, ACSL4, CTPS, TTLL13, BTK, ULK2, TTLL11, SIK1, TRIB3, PRKD1, EPHA1, ALPK1, TRIB2, EPHA3, SLC22A4, DHX9, ABCB4, HSPA4L, FIGNL2, ABCB9, MST1R, HELZ2, NUAK1, PIP5K1C, ABCA1, MYH7B, DNAH10, DMPK, DNAH17, ZFR2, ABCA4, SMARCA…	2559	1507	17446	1.19883	0.75248	0.0436163	0.0427162
GOTERM_BP_DIRECT	GO:0071773~cellular response to BMP stimulus	14	0.384299	0.000815539	ACVRL1, DLX5, KCND3, SCX, ADAMTS12, BMP6, TMEM100, BMP4, HEYL, SFRP1, BMP2, COL2A1, TNMD, ADAMTS7	2634	35	18082	2.74594	0.994147	0.0366993	0.0356449
GOTERM_MF_DIRECT	GO:0004857~enzyme inhibitor activity	15	0.411749	0.000827805	UGT1A10, LXN, UGT1A1, CRIM1, NGF, DYNLL1, FRY, TIMP2, TIMP3, TXNIP, TIMP1, ANGPTL4, UGT1A9, CD46, CD55	2559	39	17446	2.62212	0.773468	0.0436545	0.0427537
GOTERM_MF_DIRECT	GO:0005547~phosphatidylinositol-3,4,5-trisphosphate binding	15	0.411749	0.000827805	ARHGAP9, MYO10, HIP1R, ASAP1, IQGAP1, ADAP1, JPH2, MYO1B, ADAP2, KIF16B, BTK, ANXA8, OGT, MYO1G, PHLDA3	2559	39	17446	2.62212	0.773468	0.0436545	0.0427537
GOTERM_BP_DIRECT	GO:2000379~positive regulation of reactive oxygen species metabolic process	13	0.356849	0.000839137	PDGFRB, PID1, GADD45A, ACOD1, AKR1C18, THBS1, PLAU, DUOXA1, ZC3H12A, CYP1B1, NOX4, PTK2B, XDH	2634	31	18082	2.87881	0.994956	0.0374934	0.0364162
GOTERM_BP_DIRECT	GO:0009725~response to hormone	17	0.466648	0.000852582	TUB, FOXC2, SRF, FHL2, DHCR24, MSI1, ADRA1B, SREBF2, RERG, MMP14, OXCT1, TIMP2, CD38, PTK2B, TIMP1, PITX2, STEAP2	2634	48	18082	2.4313	0.995366	0.0375613	0.0364822
GOTERM_BP_DIRECT	GO:0010862~positive regulation of pathway-restricted SMAD protein phosphorylation	17	0.466648	0.000852582	GDF10, ACVRL1, TGFB2, GDF15, TGFB3, HFE, INHBB, GDF3, INHBA, GDF6, ACVR1B, BMP6, BMP5, GDF7, BMP4, BMP3, BMP2	2634	48	18082	2.4313	0.995366	0.0375613	0.0364822
GOTERM_MF_DIRECT	GO:0004872~receptor activity	42	1.1529	0.000920445	NLGN3, NOTCH3, CD40, ITGB5, IGSF1, SLC40A1, GRIK4, GRIK1, LRP2, GRIK2, SIGLECE, MED14, MRC1, ITGB7, ITGB6, EPHB2, NEO1, CADM3, UNC13A, CADM4, SEMA4D, CADM1, PAQR4, CADM2, TNFRSF9, CD180, TNFRSF19, RTN4RL2, GFRA1, GFRA3, GRIN2D, EDAR, RTN4RL1, CD48, CLEC4E, FOLR1, RAMP1, TLR3, NECTIN2, CD244, CD200, TLR2	2559	172	17446	1.66474	0.808165	0.0471531	0.0461801
GOTERM_BP_DIRECT	GO:0030154~cell differentiation	146	4.00769	0.000937158	SEMA5A, SEMA5B, SCX, FGF2, GLDN, RIMS2, CDC20, RNF114, FGF9, ZFP281, ANPEP, PEG10, INSC, SPATA24, ZC3H12A, KDR, TNFSF11, THSD7A, SEMA6B, PAQR8, SPINK2, MEF2C, UNC13A, SEMA6A, IFRD1, SOX11, MITF, EREG, EDAR, SFRP4, SFRP1, SFRP2, 1700112E06RIK, SIK1, PRKD1, NGEF, GGNBP1, DLX1, NOTCH3, SEMA7A, ZBTB1, ECSCR, ILDR2, RASAL1, HIF1A, RASGRP1, EFNB1, SBNO2, ADGRG1, WNT4, NGFR, FZD5, CADM1, GADD45B, RHBDD1…	2634	780	18082	1.28496	0.997282	0.0410007	0.0398227
KEGG_PATHWAY	mmu04064:NF-kappa B signaling pathway	28	0.768597	0.000951953	CD40, TNFAIP3, TNFRSF11A, PTGS2, MALT1, ICAM1, TNFSF13B, RELB, PLAU, CCL4, PLCG2, TRIM25, TNFSF11, BCL2A1D, LBP, CD14, VCAM1, TNFSF14, IL1R1, DDX58, TRAF1, NFKB2, NFKBIA, LCK, TRAF5, BTK, BIRC2, BIRC3	1170	97	7691	1.89751	0.234077	0.00786761	0.00621569
GOTERM_CC_DIRECT	GO:0005794~Golgi apparatus	209	5.73703	0.000952141	CHIC2, SLC35B4, ZDHHC2, GJA1, CCDC91, LIPG, KDR, CHAC1, B2M, WLS, GBP5, P3H2, FNDC3A, MAPK8IP3, WBSCR17, RRAGB, GSAP, PRKD1, PLPP3, H2-D1, RNF122, GGNBP1, HS3ST3A1, ZC3HAV1, UGCG, CHST11, CHST12, STC2, CHST15, MAP6, CD14, B4GALNT3, ATP6V0A1, ABCA1, NGFR, FZD5, ST8SIA2, RAB3IP, PDE2A, IRGM2, RAB27A, RAB39B, RAB27B, PARP10, BST2, ACER2, FASN, ID1, ACHE, ARF2, HIP1, PCSK7, PCSK5, GGTA1, SMPD3, LFNG,…	2814	1190	19662	1.22716	0.539486	0.0158172	0.0147679
GOTERM_CC_DIRECT	GO:0005915~zonula adherens	6	0.164699	0.000974407	CAMSAP3, CTNND1, KIFC3, PLEKHA7, VCL, NECTIN2	2814	7	19662	5.98903	0.547765	0.0158634	0.014811
GOTERM_BP_DIRECT	GO:0045893~positive regulation of transcription, DNA-templated	112	3.07439	0.00100606	SPI1, SCX, RBPJ, FGF2, SOX2, FGF7, FGF9, ZFP281, SOX18, MYC, ZXDC, PIM1, SOX8, PITX2, SOX6, SOX7, MAP2K3, MAP2K1, MEF2C, F2R, SOX11, MITF, FOXP3, FOXP1, NPAS4, SFRP1, MYCN, PGR, TRIM16, ZFPM2, IFNAR1, BLM, DLX5, HIF1A, NPAS2, PPARGC1A, WNT4, FZD1, JUN, ZFHX3, AFAP1L2, FZD2, FOXF2, TGFB3, FOXF1, PTCH1, HMGA1, NFATC2, SMAD9, ESRRG, NR1D1, PBX4, IGF1, INHBA, SMARCA1, GDF6, TRERF1, GDF7, NR4A2, NFKBI…	2634	576	18082	1.33483	0.99824	0.0436004	0.0423478
GOTERM_BP_DIRECT	GO:0090263~positive regulation of canonical Wnt signaling pathway	21	0.576448	0.00101042	EDA, DLX5, TNKS, CAV1, LRRK1, ILK, FGF2, DKK2, SFRP4, GPRC5B, SFRP1, SFRP2, FGF9, BAMBI, RSPO2, RSPO3, WNT2, LGR5, FGFR2, WNT4, WLS	2634	67	18082	2.15167	0.998288	0.0436004	0.0423478
GOTERM_BP_DIRECT	GO:0002237~response to molecule of bacterial origin	8	0.219599	0.00105178	H2-M3, TNFAIP3, CXCL1, CD14, CXCL2, B2M, MALT1, TLR2	2634	13	18082	4.22452	0.998681	0.0445548	0.0432748
KEGG_PATHWAY	mmu04974:Protein digestion and absorption	26	0.713698	0.00105184	KCNK5, COL15A1, CPB1, COL14A1, ELN, COL12A1, ATP1A4, ATP1A3, ATP1A2, DPP4, COL10A1, COL27A1, COL24A1, COL22A1, ATP1B1, COL3A1, COL2A1, COL4A2, COL5A1, SLC7A8, COL4A1, COL6A2, COL6A1, COL6A4, COL6A3, COL9A3	1170	88	7691	1.94217	0.255222	0.00844474	0.00667164
GOTERM_BP_DIRECT	GO:0034340~response to type I interferon	6	0.164699	0.001059	SHMT2, STAT1, MX2, A230050P20RIK, ISG15, IKBKE	2634	7	18082	5.88415	0.99874	0.0445548	0.0432748
GOTERM_BP_DIRECT	GO:0048671~negative regulation of collateral sprouting	6	0.164699	0.001059	EPHA7, IFRD1, ULK2, FGF13, FSTL4, RGMA	2634	7	18082	5.88415	0.99874	0.0445548	0.0432748
GOTERM_BP_DIRECT	GO:0031290~retinal ganglion cell axon guidance	10	0.274499	0.00106083	NRP1, EPHA7, ALCAM, SLIT1, PTPRM, SEMA4F, NRCAM, EPHB2, EPHB1, EPHB3	2634	20	18082	3.43242	0.998754	0.0445548	0.0432748
GOTERM_MF_DIRECT	GO:0030898~actin-dependent ATPase activity	8	0.219599	0.00109716	MYO1D, MYL6, MYO1B, MYO1C, MYO10, MYH14, MYH9, MYH10	2559	13	17446	4.19539	0.860303	0.0546445	0.0535168
GOTERM_BP_DIRECT	GO:0040007~growth	14	0.384299	0.00110811	TGFB2, TGFB3, INHBB, GDF3, INHBA, GDF6, BMP6, FOXP2, BMP5, VEGFA, GDF7, BMP4, BMP3, BMP2	2634	36	18082	2.66966	0.999075	0.0457943	0.0444786
GOTERM_BP_DIRECT	GO:0030513~positive regulation of BMP signaling pathway	14	0.384299	0.00110811	ACVRL1, FOXD1, MSX2, ILK, SOX11, RBPJ, TGFBR3, BMP4, GPC3, KDR, KCP, HES1, NEO1, RNF165	2634	36	18082	2.66966	0.999075	0.0457943	0.0444786
GOTERM_BP_DIRECT	GO:0002230~positive regulation of defense response to virus by host	32	0.878397	0.00111215	MYOM1, TRAF3IP2, HILPDA, PTPN22, MYLK, PYCARD, TRIM6, FGF7, SNTG1, ZC3H12A, PDK4, STOM, HIST2H3C2, HIST2H3C1, CAR7, HIST1H3B, HIST1H3D, CD93, DDX58, STAT2, ANXA5, ATP1B1, MTSS1, CREB3, FGF14, FAM131B, ACKR3, CSPG5, TNIK, ASB2, ALPK1, CHST3	2634	122	18082	1.80061	0.999099	0.0457943	0.0444786
GOTERM_CC_DIRECT	GO:0014069~postsynaptic density	53	1.45484	0.00113328	MYLK2, CLSTN2, GRIK1, GRIK2, PPP1R9A, ACTB, PCLO, NETO1, PDE4B, DLGAP1, NEFM, SYNPO, IL1R1, SYN3, SRCIN1, SYN2, DNM3, ARC, ITGA8, EXOC4, NSMF, PKP4, MET, CRYAB, RGS14, CACNA1C, AKAP5, RTN4, CNN3, DRP2, PAK1, ABLIM1, GNG3, PDZD2, CAMK2N1, MAP2, SYNDIG1, PTK2B, PDLIM5, CAMK2G, NGFR, HOMER2, BCL11A, PTCH1, BNIP3, SEMA4C, HIP1R, SORBS2, NETO2, DCLK1, LRFN1, STRN, IGSF9B	2814	239	19662	1.54946	0.602679	0.018088	0.0168881
GOTERM_BP_DIRECT	GO:0007159~leukocyte cell-cell adhesion	11	0.301949	0.00116375	SELP, NT5E, ITGAM, VCAM1, ROCK1, TNIP1, OLR1, ITGAL, EZR, SELE, ICAM1	2634	24	18082	3.14639	0.999349	0.0473008	0.0459419
GOTERM_BP_DIRECT	GO:0045987~positive regulation of smooth muscle contraction	11	0.301949	0.00116375	MYOCD, TBXA2R, SRF, SPHK1, ITGA2, F2R, ADRA1D, PTGS2, ADRA1B, ADA, PTGS1	2634	24	18082	3.14639	0.999349	0.0473008	0.0459419
GOTERM_BP_DIRECT	GO:0090136~epithelial cell-cell adhesion	7	0.192149	0.00117305	CAMSAP3, ITGB5, SRF, KIFC3, BVES, PLEKHA7, VCL	2634	10	18082	4.80539	0.999386	0.0473733	0.0460122
GOTERM_BP_DIRECT	GO:0001570~vasculogenesis	21	0.576448	0.00123848	MYOCD, ANGPT1, FOXF1, CAV1, TIE1, PTPRJ, ADM, ZFP36L1, TMEM100, TGFBR3, MYO1E, HEY1, SOX18, WT1, MYO18B, HEY2, KDR, ACKR3, ZFPM2, PITX2, JUNB	2634	68	18082	2.12003	0.999594	0.049697	0.0482692
GOTERM_CC_DIRECT	GO:0005614~interstitial matrix	9	0.247049	0.00126012	VIT, CCDC80, ECM2, COL14A1, ABI3BP, MAMDC2, TNC, IGF1, KAZALD1	2814	17	19662	3.69911	0.641699	0.0197256	0.0184171
KEGG_PATHWAY	mmu05144:Malaria	17	0.466648	0.00133607	TGFB2, CD40, VCAM1, GYPC, TGFB3, HGF, THBS2, ITGAL, THBS1, SELE, ICAM1, COMP, SELP, IL6, CCL2, MET, TLR2	1170	48	7691	2.32812	0.312263	0.0104287	0.00823907
GOTERM_MF_DIRECT	GO:0005216~ion channel activity	41	1.12545	0.00137247	HCN4, RYR1, RYR2, KCNG3, CHRNA2, CATSPER2, KCNC2, KCNA1, KCNA3, KCNA4, GRIK4, GRIK1, KCNA5, ITPR3, CACNA1C, GRIK2, KCNA7, CLCN3, NALCN, CACNA1H, KCNH1, KCNF1, TRPC6, KCND3, TRPC4, KCNB1, TRPC1, GABRA4, TRPC2, GABRA3, TRPV2, GRIN2D, CLCN5, CLCN4, KCNS1, P2RX3, P2RX1, SCN8A, KCNMA1, KCNQ5, KCNK3	2559	170	17446	1.64422	0.91478	0.066509	0.0651365
GOTERM_BP_DIRECT	GO:0050830~defense response to Gram-positive bacterium	26	0.713698	0.0013881	H2-T23, TNFAIP8, C5AR1, ADM, NOD1, NOD2, IL27RA, ACP5, TNFRSF14, LBP, GBP2, B2M, GBP3, GSDMD, GBP6, GBP7, GBP9, SSC5D, HIST2H2BE, HCK, 2610528A11RIK, HIST1H2BE, TNFSF8, MYO1F, TLR2, HIST1H2BC	2634	93	18082	1.9192	0.999842	0.0553482	0.053758
GOTERM_BP_DIRECT	GO:1900745~positive regulation of p38MAPK cascade	9	0.247049	0.00141778	BMP2, GADD45B, GADD45A, ZC3H12A, GDF6, XDH, MET, VEGFA, GADD45G	2634	17	18082	3.63433	0.999869	0.0558252	0.0542213
GOTERM_BP_DIRECT	GO:0050870~positive regulation of T cell activation	9	0.247049	0.00141778	PYCARD, LCK, TNFSF11, CCL2, CD47, THY1, CORO1A, MALT1, ADA	2634	17	18082	3.63433	0.999869	0.0558252	0.0542213
GOTERM_BP_DIRECT	GO:0010977~negative regulation of neuron projection development	20	0.548998	0.00143656	NGFR, IL15RA, NTM, H2-K1, CRMP1, RBPJ, RTN4, RGMA, STX1B, MAG, TNR, FLNA, HES1, CSPG4, VIM, FKBP4, B2M, EPHA3, H2-D1, MAP4K4	2634	64	18082	2.14526	0.999884	0.0562133	0.0545983
KEGG_PATHWAY	mmu04145:Phagosome	42	1.1529	0.00154409	H2-T23, H2-T22, ITGAM, ITGB5, H2-Q6, H2-M3, H2-Q7, H2-K1, H2-M1, TCIRG1, THBS2, THBS1, CORO1A, ACTB, ACTG1, C3, COMP, TUBA1A, CLEC7A, TUBB3, MRC1, OLR1, CD14, ATP6V0E2, RILP, ATP6V1D, ATP6V0A1, C1RA, H2-T10, ITGA2, TAP1, TUBB4A, TUBB2B, TUBB2A, FCGR4, TLR6, ATP6V0D1, FCGR2B, H2-D1, ATP6V1B1, TLR2, H2-AB1	1170	171	7691	1.61454	0.351232	0.0117268	0.00926455
GOTERM_BP_DIRECT	GO:0009887~organ morphogenesis	29	0.796047	0.00158084	LAMA5, NRP1, CXCR4, TCF21, DLL1, TGM1, WNT11, RDH10, PDGFC, GPC3, TNFSF11, EPHB2, PITX2, GAMT, PDGFRA, JAG1, EYA1, TGFB3, FOXF1, PTCH1, VEGFC, TBX3, EREG, GREM1, BMP2, IL7, PAX9, LHX4, FGFR2	2634	109	18082	1.82643	0.999953	0.0614773	0.059711
GOTERM_BP_DIRECT	GO:0030316~osteoclast differentiation	12	0.329399	0.00166925	FARP2, CSF1R, SBNO2, GPR183, GPC3, TNFSF11, TRF, MITF, SNX10, TNFRSF11A, JUNB, FOXP1	2634	29	18082	2.84063	0.999973	0.0644715	0.0626192
GOTERM_BP_DIRECT	GO:0043547~positive regulation of GTPase activity	36	0.988197	0.00167831	CD40, CCL11, ASAP3, ADRB1, THY1, RASGRP1, CX3CL1, ICAM1, RGS4, CCL9, WNT11, CCL8, CCL7, CCL6, CCL4, CCL3, S1PR1, CCL2, SH3BGRL3, RSU1, CCL17, RGS9, RGS6, RGS7, WNT4, MAP2K1, SEMA4D, VAV1, RGMA, ARHGAP23, MEX3B, PKP4, GNB5, AGRN, ARHGEF7, ARHGEF5	2634	146	18082	1.6927	0.999975	0.0644715	0.0626192
GOTERM_BP_DIRECT	GO:0048844~artery morphogenesis	11	0.301949	0.0016887	NOTCH3, NRP1, FOXC2, WNT11, GJA5, CHD7, PRRX2, HES1, PRDM1, RBPJ, VEGFA	2634	25	18082	3.02053	0.999976	0.0644778	0.0626253
KEGG_PATHWAY	mmu04540:Gap junction	25	0.686248	0.00171839	GUCY1B3, ADRB1, ITPR3, HTR2A, ADCY1, ADCY8, ADCY7, EGFR, ADCY5, GJA1, TUBA1A, TUBB3, GNA11, PDGFC, DRD1, PRKG1, PDGFRB, GUCY1A3, GUCY1A2, PDGFRA, MAP2K1, TUBB4A, TUBB2B, TUBB2A, PLCB2	1170	86	7691	1.9109	0.382183	0.012707	0.010039
GOTERM_BP_DIRECT	GO:0010811~positive regulation of cell-substrate adhesion	15	0.411749	0.00176687	VIT, ECM2, ITGA3, FOXF1, NDNF, THBS1, CCDC80, SPOCK2, SMOC1, ABI3BP, SPP1, COL8A1, RSU1, JAK2, EDIL3	2634	42	18082	2.45173	0.999986	0.0666542	0.0647392
GOTERM_BP_DIRECT	GO:0055072~iron ion homeostasis	15	0.411749	0.00176687	STEAP3, STEAP4, SCARA5, HFE, SLC40A1, TRF, SOD2, SLC25A37, TFR2, LCN2, FBXL5, STEAP1, STEAP2, B2M, NEO1	2634	42	18082	2.45173	0.999986	0.0666542	0.0647392
GOTERM_MF_DIRECT	GO:0045296~cadherin binding	12	0.329399	0.00176723	MMP24, JUP, NOS2, TRPC4, CTNND1, PTPRM, CDH13, AKAP5, CD46, NDRG1, NEO1, CTNNAL1	2559	29	17446	2.82104	0.958057	0.0818957	0.0802057
GOTERM_MF_DIRECT	GO:0043395~heparan sulfate proteoglycan binding	11	0.301949	0.00178133	SEMA5A, GREM1, COMP, ITGAM, FST, SLIT1, GPC3, ATP1A3, HPSE, AGRN, GPC6	2559	25	17446	2.9997	0.959106	0.0818957	0.0802057
GOTERM_BP_DIRECT	GO:0050709~negative regulation of protein secretion	8	0.219599	0.00184001	RHBDF1, ANXA1, RSAD2, RHBDF2, DRD3, NEO1, SRCIN1, DRD4	2634	14	18082	3.92277	0.999991	0.0690003	0.0670179
GOTERM_CC_DIRECT	GO:0005938~cell cortex	35	0.960747	0.00189022	RYR1, NEDD9, CRIP2, FMN2, RASAL3, FRY, PDZD4, GRK4, FAM110C, INSC, VMN2R1, COL10A1, PTK2B, FLNA, HMCN1, MYH10, DRD4, CLASP2, MAP2K1, ANXA2, MYO10, CAV1, PLA2G4C, HIP1R, COBL, TLE6, WDR81, BIN2, SPIRE2, MYH9, PRKD1, EZR, ARHGEF7, FGFR2, RAI14	2814	144	19662	1.69828	0.785639	0.0290309	0.027105
GOTERM_MF_DIRECT	GO:0008017~microtubule binding	46	1.2627	0.00189139	MTAP7D3, RGS14, DCTN1, FMN2, NDRG1, JAKMIP3, CNN3, POLB, BCL2L11, FNTA, MAP2, MAP6, KIF1C, KIF21A, KIF1A, KIF21B, TPPP, FAM83D, GAS2L1, SYBU, CLASP2, PRNP, SGIP1, MX2, RCC2, MTUS2, MID1, EML1, MID2, EML2, KIF27, CAMSAP3, EML4, REEP1, DNM3, NEIL2, WDR81, KIF26A, KIF16B, KIF26B, MAP6D1, KIFC3, EZR, FGF13, SAXO2, CRYAB	2559	200	17446	1.56803	0.966442	0.0847816	0.083032
GOTERM_BP_DIRECT	GO:0048662~negative regulation of smooth muscle cell proliferation	14	0.384299	0.00195787	NDRG4, PTGIR, VIPR2, IGFBP5, CAV1, IGFBP3, NPR3, TNFAIP3, ILK, PIK3R1, AIF1, NPPB, PPARG, PPARGC1A	2634	38	18082	2.52915	0.999996	0.0721319	0.0700595
GOTERM_BP_DIRECT	GO:0070527~platelet aggregation	14	0.384299	0.00195787	P2RY12, PDGFRA, ILK, HSPB1, SLC7A11, ACTB, ACTG1, CSRP1, FLNA, MYH9, PIP5K1C, TLN1, MYL9, VCL	2634	38	18082	2.52915	0.999996	0.0721319	0.0700595
GOTERM_BP_DIRECT	GO:0060412~ventricular septum morphogenesis	14	0.384299	0.00195787	FZD1, TGFB2, FZD2, SOX11, TBX3, TGFBR3, HEYL, WNT11, HEY1, GJA5, HEY2, HES1, ZFPM2, PITX2	2634	38	18082	2.52915	0.999996	0.0721319	0.0700595
GOTERM_CC_DIRECT	GO:0030315~T-tubule	18	0.494098	0.00195871	RYR1, AHNAK, KCNJ12, TGFB3, AHNAK2, ATP2B4, DYSF, ABCC9, ATP1A2, AKAP6, SLC30A1, CACNA1C, ADRA1B, PRKAR2A, CASQ1, EZR, KCNJ2, SCN1B	2814	57	19662	2.20649	0.797285	0.0295257	0.027567
GOTERM_BP_DIRECT	GO:0051450~myoblast proliferation	5	0.13725	0.00198256	GPX1, HGF, ATOH8, IGF1, MET	2634	5	18082	6.86484	0.999996	0.0721973	0.0701231
GOTERM_BP_DIRECT	GO:1900086~positive regulation of peptidyl-tyrosine autophosphorylation	5	0.13725	0.00198256	GREM1, ACE, CTNND1, IQGAP1, VEGFA	2634	5	18082	6.86484	0.999996	0.0721973	0.0701231
GOTERM_MF_DIRECT	GO:0046983~protein dimerization activity	44	1.2078	0.00209144	SRF, TCF23, SCX, TCF21, DBI, HIF3A, HIF1A, ASCL2, NPAS1, NPAS2, PYCARD, LYL1, PPP3CA, PRDX5, HEY1, MYC, MXI1, HEY2, ATOH8, HES1, E2F6, BOK, MEF2C, TFEB, SLC4A11, MITF, ANO4, ANO5, SYN2, ANO2, SREBF2, NPAS4, HEYL, MYCL, MYCN, TAL1, BHLHE40, ID1, TFEC, ID4, ID3, HPSE, ADGRL4, MXD4	2559	190	17446	1.57879	0.976573	0.0914623	0.0895749
GOTERM_BP_DIRECT	GO:0070373~negative regulation of ERK1 and ERK2 cascade	20	0.548998	0.00213642	DUSP4, ERRFI1, DUSP3, RGS14, DUSP1, CAV1, DAB2IP, LIF, FBLN1, IGF1, RPS6KA6, TNIP1, WNK2, ABL1, SPRY2, TIMP3, DMD, SPRY1, EZR, PTPN2	2634	66	18082	2.08026	0.999999	0.0769112	0.0747016
GOTERM_BP_DIRECT	GO:0032088~negative regulation of NF-kappaB transcription factor activity	20	0.548998	0.00213642	PSMD10, RWDD3, CDKN2A, DAB2IP, NLRC5, TNFAIP3, ACOD1, IRAK3, NOD2, FOXP3, PARP10, PKHD1, PYCARD, NFKBIA, DAP, IRAK2, ZC3H12A, CYP1B1, TRIM21, CMKLR1	2634	66	18082	2.08026	0.999999	0.0769112	0.0747016
GOTERM_BP_DIRECT	GO:0032755~positive regulation of interleukin-6 production	17	0.466648	0.00221133	IL33, DDX58, IL1F9, IL6RA, NOD1, VEGFD, NOD2, MAPK13, PYCARD, IL6, IL1RL2, ADORA2B, TNFSF9, LBP, CCR5, TLR3, TLR2	2634	52	18082	2.24428	0.999999	0.0771383	0.0749221
GOTERM_BP_DIRECT	GO:0001942~hair follicle development	17	0.466648	0.00221133	LAMA5, TGFB2, FZD3, EDA, FZD6, TNFRSF19, DBI, INHBA, HOXC13, ACVR1B, FOXN1, EGFR, EDAR, VANGL2, SOX18, CD109, LGR5	2634	52	18082	2.24428	0.999999	0.0771383	0.0749221
GOTERM_BP_DIRECT	GO:0030182~neuron differentiation	32	0.878397	0.00221643	CEBPB, CEND1, RBPJ, HDAC9, NRBP2, WNT11, TUBB3, S1PR1, PITX2, HOXC8, WNT2, WNT4, MAP2K1, MEF2C, TRPC6, MBD1, ACSL4, GFRA1, WNT9A, SMARCA1, WNT16, HIPK2, PTPRD, EFNA1, NR4A2, GDNF, TAL1, ALDH1A2, ID1, DDIT4, ID3, GAS7	2634	127	18082	1.72972	0.999999	0.0771383	0.0749221
GOTERM_BP_DIRECT	GO:0050730~regulation of peptidyl-tyrosine phosphorylation	9	0.247049	0.00222844	PDGFRB, EFNA1, PDCL3, EPHA7, TMEM102, PDGFC, PTPN22, EGFR, IFNAR1	2634	18	18082	3.43242	0.999999	0.0771383	0.0749221
GOTERM_BP_DIRECT	GO:0007413~axonal fasciculation	9	0.247049	0.00222844	SEMA5A, NRP1, PTPRZ1, NDN, CNTN2, EPHB2, RTN4, CELSR3, EPHB3	2634	18	18082	3.43242	0.999999	0.0771383	0.0749221
GOTERM_BP_DIRECT	GO:0051770~positive regulation of nitric-oxide synthase biosynthetic process	9	0.247049	0.00222844	FNTA, STAT1, NAMPT, KDR, CCL2, NOD2, JAK2, TLR2, MAP2K6	2634	18	18082	3.43242	0.999999	0.0771383	0.0749221
GOTERM_BP_DIRECT	GO:0030889~negative regulation of B cell proliferation	9	0.247049	0.00222844	CDKN2A, CD300A, INPP5D, BTK, PAWR, PRDM1, PKN1, FCGR2B, TNFRSF21	2634	18	18082	3.43242	0.999999	0.0771383	0.0749221
GOTERM_BP_DIRECT	GO:0032825~positive regulation of natural killer cell differentiation	7	0.192149	0.00226314	STAT5A, IL15RA, IRF1, ZBTB1, FLT3L, GAS6, RASGRP1	2634	11	18082	4.36854	0.999999	0.0774879	0.0752616
GOTERM_BP_DIRECT	GO:0003184~pulmonary valve morphogenesis	7	0.192149	0.00226314	BMP4, HEYL, TGFB2, JAG1, HEY1, HEY2, SMAD6	2634	11	18082	4.36854	0.999999	0.0774879	0.0752616
KEGG_PATHWAY	mmu05132:Salmonella infection	23	0.631348	0.00226988	JUN, ROCK1, NOS2, WAS, CXCL1, ARPC4, FOS, ARPC5, CXCL3, CXCL2, ACTB, ACTG1, MAPK13, PYCARD, IL6, CCL4, CASP1, CCL3, FLNA, LBP, CD14, PKN1, RILP	1170	78	7691	1.93834	0.470747	0.0163548	0.0129209
GOTERM_CC_DIRECT	GO:0020005~symbiont-containing vacuole membrane	6	0.164699	0.00229149	GBP6, GBP7, GBP9, GBP2, IIGP1, GBP3	2814	8	19662	5.24041	0.845478	0.0339141	0.0316643
GOTERM_BP_DIRECT	GO:0001958~endochondral ossification	12	0.329399	0.00229287	BMP4, MMP14, MEF2C, COL2A1, MMP13, MMP16, DLX5, FGF18, SCX, COL10A1, ALPL, BMP6	2634	30	18082	2.74594	0.999999	0.0776616	0.0754304
GOTERM_BP_DIRECT	GO:0042832~defense response to protozoan	12	0.329399	0.00229287	GBP6, IL6, CD40, GBP7, GBP9, BCL3, IRGM2, IL4RA, GBP2, IIGP1, BATF, GBP3	2634	30	18082	2.74594	0.999999	0.0776616	0.0754304
GOTERM_BP_DIRECT	GO:0035924~cellular response to vascular endothelial growth factor stimulus	10	0.274499	0.00238793	ERN1, NRP1, EGR3, VCAM1, FLT4, DAB2IP, KDR, HSPB1, PRKD1, VEGFA	2634	22	18082	3.12038	1	0.0788256	0.0765609
GOTERM_BP_DIRECT	GO:0022617~extracellular matrix disassembly	10	0.274499	0.00238793	MMP12, MMP13, EXOC8, LAMB3, LAMA1, MMP3, LAMA3, NOXO1, LAMB1, LCP1	2634	22	18082	3.12038	1	0.0788256	0.0765609
GOTERM_BP_DIRECT	GO:0001954~positive regulation of cell-matrix adhesion	11	0.301949	0.00238979	NINJ1, DAG1, VEGFC, CDH13, ILK, PTK2B, PTPRJ, DMD, UTRN, EPHA1, CCL28	2634	26	18082	2.90436	1	0.0788256	0.0765609
GOTERM_BP_DIRECT	GO:0032967~positive regulation of collagen biosynthetic process	11	0.301949	0.00238979	PDGFRB, BMP4, RGCC, TGFB3, ITGA2, F2R, SCX, CCL2, MKX, LTBP1, WNT4	2634	26	18082	2.90436	1	0.0788256	0.0765609
GOTERM_BP_DIRECT	GO:0034341~response to interferon-gamma	11	0.301949	0.00238979	IFITM3, BST2, CYP27B1, TGTP2, IFITM1, IFITM2, GCH1, A230050P20RIK, IRGM2, TRIM21, CXCL16	2634	26	18082	2.90436	1	0.0788256	0.0765609
KEGG_PATHWAY	mmu02010:ABC transporters	16	0.439198	0.00239605	ABCA1, ABCC1, ABCD2, ABCA8A, ABCA8B, ABCB4, ABCA4, TAP1, ABCC9, ABCB9, ABCA12, ABCB10, ABCG3, ABCB1A, ABCB1B, ABCG1	1170	46	7691	2.28644	0.48916	0.0168323	0.0132981
GOTERM_BP_DIRECT	GO:0043524~negative regulation of neuron apoptotic process	38	1.0431	0.00247874	CNTFR, NRP1, DLX1, DRAXIN, CEBPB, ROCK1, C5AR1, ILK, NDNF, GRIK2, HIF1A, CORO1A, NRBP2, CHL1, NTF3, KDR, CCL2, PTK2B, JAK2, PPARGC1A, BOK, NGFR, JUN, MEF2C, ANGPT1, TGFB3, UNC5B, F2R, MT1, NGF, SOD2, AGT, VEGFA, AGTR1B, HIPK2, NR4A2, NR4A3, GDNF	2634	160	18082	1.6304	1	0.0797559	0.0774645
GOTERM_BP_DIRECT	GO:0072006~nephron development	6	0.164699	0.00248457	JAG1, ITGA3, DCHS1, FAT4, DLL1, WNT4	2634	8	18082	5.14863	1	0.0797559	0.0774645
GOTERM_BP_DIRECT	GO:0071679~commissural neuron axon guidance	6	0.164699	0.00248457	NRP1, FZD3, NFIB, DAG1, EPHB2, VEGFA	2634	8	18082	5.14863	1	0.0797559	0.0774645
GOTERM_BP_DIRECT	GO:1901222~regulation of NIK/NF-kappaB signaling	6	0.164699	0.00248457	RASSF2, EDA, PTPN22, UACA, BIRC2, BIRC3	2634	8	18082	5.14863	1	0.0797559	0.0774645
GOTERM_BP_DIRECT	GO:0002489~antigen processing and presentation of endogenous peptide antigen via MHC class Ib via ER pathway, TAP-dependent	6	0.164699	0.00248457	H2-T23, ABCB4, TAP1, ABCB9, ABCB1A, ABCB1B	2634	8	18082	5.14863	1	0.0797559	0.0774645
GOTERM_BP_DIRECT	GO:0008217~regulation of blood pressure	19	0.521548	0.00249396	AOC3, GUCY1A3, ACVRL1, ACE, GCH1, ERAP1, NPR3, NPY1R, ATP1A2, CACNA1C, SOD2, PTGS2, DLL1, AGT, PTGS1, ACTA2, EDNRB, P2RX1, PPARG	2634	62	18082	2.10374	1	0.0797559	0.0774645
GOTERM_BP_DIRECT	GO:0001657~ureteric bud development	16	0.439198	0.00253634	FOXC2, EYA1, SDC4, TCF21, SMAD9, SMAD6, BMP4, VCAN, SFRP1, GDNF, BMPER, GSTA3, WT1, RARB, SPRY1, FGFR2	2634	48	18082	2.28828	1	0.0807018	0.0783832
GOTERM_CC_DIRECT	GO:0005884~actin filament	20	0.548998	0.00253659	WDR1, ACTN1, LMOD1, GDPD2, COBL, PAWR, FMN2, AIF1, CORO1A, ACTA1, HCK, MYO1B, PALLD, INPP5D, FLNA, PLS3, LCP1, EZR, VCL, GAS7	2814	68	19662	2.05506	0.873487	0.0368712	0.0344252
GOTERM_MF_DIRECT	GO:0008046~axon guidance receptor activity	6	0.164699	0.00256441	SEMA5A, EPHA7, EPHB2, GFRA3, EPHB1, EPHB3	2559	8	17446	5.11313	0.989987	0.109476	0.107217
GOTERM_BP_DIRECT	GO:0051897~positive regulation of protein kinase B signaling	26	0.713698	0.00260806	SEMA5A, ILK, AKR1C18, PTPRJ, MST1R, THBS1, FGF2, EGFR, PIK3R5, C1QTNF3, C1QTNF1, FAM110C, TNFSF11, NGFR, GPX1, IGFBP5, ANGPT1, IGF1, VEGFA, IL6, CD28, SPRY2, NOX4, HPSE, GAS6, TSPYL5	2634	97	18082	1.84006	1	0.0825668	0.0801947
GOTERM_BP_DIRECT	GO:0060395~SMAD protein signal transduction	22	0.603898	0.00267202	GDF10, TGFB2, RBM14, JUN, GDF15, TGFB3, TRF, SMAD9, INHBB, GDF3, INHBA, FOS, GDF6, BMP6, BMP5, GDF7, HIPK2, BMP4, BMP3, BMP2, ATOH8, VIM	2634	77	18082	1.96138	1	0.0841687	0.0817506
GOTERM_MF_DIRECT	GO:0042802~identical protein binding	118	3.23909	0.00269437	CDA, ABAT, IFIT3, ACTB, BEST1, ACTG1, PYCARD, C1S2, CCDC91, C1S1, GJA3, RASSF3, TNN, GLUL, TRIM21, B2M, KCNH1, GBP5, CCDC155, PRKAB2, DAPK1, MID1, ERN1, SFRP1, EID3, TYROBP, BTK, S100A4, PRKD1, TRIM12C, SHMT2, FBLN1, CORO1A, DPP4, SCUBE2, BAG2, CMYA5, DRD4, PRNP, JUN, TGFB3, CAV1, FN1, INHBA, SMAD6, IIGP1, NFKBIA, SDK1, GRIN3A, HOOK2, FASN, MYOM1, RYR2, LRRK1, SLC2A1, FHL2, PTPRM, HSPB1, GRIK2, C…	2559	625	17446	1.28715	0.992073	0.112349	0.11003
KEGG_PATHWAY	mmu05168:Herpes simplex infection	48	1.3176	0.00269749	H2-T23, SP100, H2-T22, H2-Q6, H2-M3, H2-Q7, H2-K1, OAS1A, H2-M1, OAS1B, IFIT1, OAS1G, IFIH1, C3, SOCS3, NXF2, CCL2, TNFRSF14, JAK2, ALYREF2, TAF9B, IKBKE, IFNAR2, CD74, JUN, H2-T10, TNFSF14, STAT1, DDX58, STAT2, TAP1, FOS, TRAF1, NFKBIA, IL6, OAS2, OAS3, TRAF5, IRF7, FAS, HC, TLR3, IRF9, NECTIN2, H2-D1, TLR2, IFNAR1, H2-AB1	1170	208	7691	1.51696	0.530608	0.0177564	0.0140282
KEGG_PATHWAY	mmu05416:Viral myocarditis	23	0.631348	0.00270494	H2-T23, CD40, H2-T22, H2-T10, CXADR, CAV1, H2-Q6, H2-Q7, H2-M3, H2-K1, H2-M1, ITGAL, ACTB, ACTG1, ICAM1, SGCA, CD28, DAG1, ABL1, DMD, CD55, H2-D1, H2-AB1	1170	79	7691	1.91381	0.531589	0.0177564	0.0140282
KEGG_PATHWAY	mmu04666:Fc gamma R-mediated phagocytosis	24	0.658798	0.00278037	MARCKSL1, MAP2K1, GSN, MYO10, LIMK2, SPHK1, WAS, ASAP3, PIK3R3, ASAP1, ARPC4, PIK3R1, ARPC5, VAV1, PIK3R5, HCK, PAK1, INPP5D, PLCG2, PIP5K1C, DOCK2, PLPP3, FCGR2B, PLPP1	1170	84	7691	1.87814	0.541405	0.0177564	0.0140282
KEGG_PATHWAY	mmu05222:Small cell lung cancer	24	0.658798	0.00278037	LAMA5, CDKN2B, LAMB3, NOS2, LAMA1, LAMB2, ITGA3, ITGA2, LAMA3, FN1, PIK3R3, LAMB1, TRAF1, PIK3R1, PTGS2, PIK3R5, NFKBIA, COL4A2, COL4A1, MYC, TRAF5, RARB, BIRC2, BIRC3	1170	84	7691	1.87814	0.541405	0.0177564	0.0140282
GOTERM_CC_DIRECT	GO:0016323~basolateral plasma membrane	45	1.23525	0.00280188	HCN4, DDR1, NDRG4, MEGF10, KCNC2, SLC22A2, AQP9, C5AR1, SLC2A1, SLC40A1, NOD1, AKAP5, PTH1R, NOD2, SLC4A2, PKD1, EGFR, BEST1, ATP7B, DAG1, CAR9, CNNM2, LDLR, SLC19A1, ABCC1, ANXA1, CXADR, PIANP, CADM1, ANXA2, ITGA3, TRPC4, TRPC1, SLC4A10, ATP2B4, ATP1B1, AGTR1B, MYO1D, VANGL2, SLC7A8, CLDN19, CD46, EZR, FOLR1, ATP6V1B1	2814	203	19662	1.54889	0.898117	0.0400128	0.0373584
GOTERM_BP_DIRECT	GO:0071456~cellular response to hypoxia	27	0.741147	0.00295812	STC1, NDNF, FMN2, VLDLR, PTGS2, NDRG1, HIF1A, ICAM1, ERO1L, ZFP36L1, FAM162A, KCNMB1, STC2, LMNA, PMAIP1, PPARGC1A, ANGPT4, TRPC6, BNIP3, S100B, VEGFA, SFRP1, RGCC, MDM4, MGARP, CPEB2, KCNK3	2634	103	18082	1.79952	1	0.0927171	0.0900533
GOTERM_BP_DIRECT	GO:0032481~positive regulation of type I interferon production	8	0.219599	0.00301893	IRF1, DHX58, PLCG2, IRF7, PTPN22, CD14, ZC3HAV1, TLR3	2634	15	18082	3.66125	1	0.0939278	0.0912293
GOTERM_BP_DIRECT	GO:0002244~hematopoietic progenitor cell differentiation	26	0.713698	0.00302656	RBM47, CEBPD, PTPRQ, PLD4, ADAR, SIGLECG, SMPD3, PTPRZ1, ACP6, RRS1, DACT2, BVES, HERC6, ARL11, PDGFRA, APOBEC3, COL24A1, FST, TMEM190, INHBA, EML1, BMP4, SFRP1, ARMC6, KCP, ARHGEF7	2634	98	18082	1.82129	1	0.0939278	0.0912293
GOTERM_BP_DIRECT	GO:0045214~sarcomere organization	12	0.329399	0.00309242	FHOD3, KRT19, WDR1, TNNT2, SRF, TPM1, CASQ2, LDB3, NEB, CASQ1, ACTG1, FOXP1	2634	31	18082	2.65736	1	0.0955011	0.0927574
GOTERM_BP_DIRECT	GO:0034765~regulation of ion transmembrane transport	33	0.905847	0.0031187	HCN4, KCNG3, CATSPER2, KCNC2, KCNA1, KCNA3, KCNA4, KCNA5, CACNA1C, KCNA7, NALCN, CACNA1H, STOM, SCN3B, KCNJ2, SCN1B, KCNH1, KCNF1, KCNJ12, KCND3, KCNB1, KCNJ14, KCNK13, KCNJ15, CYBB, WWP2, KCNAB1, CACNB2, TMEM37, KCNS1, SCN8A, KCNMA1, KCNQ5	2634	135	18082	1.67807	1	0.095843	0.0930894
GOTERM_BP_DIRECT	GO:0007015~actin filament organization	23	0.631348	0.00315649	FHOD3, CCDC155, CCL11, SRF, ACTN1, WAS, LMOD1, TRF, SORBS2, RHOF, SORBS1, PPP1R9A, CORO1A, SORBS3, MTSS1, RND1, PDLIM3, MYO1B, TMSB4X, CASP4, FSCN1, FAT1, PTK2B	2634	83	18082	1.90231	1	0.0963042	0.0935374
GOTERM_BP_DIRECT	GO:0007160~cell-matrix adhesion	22	0.603898	0.00316428	SNED1, EDA, VCAM1, ITGB5, SRF, ITGA2, ITGA1, FN1, ADAMTS12, ITGAL, NID2, AGT, COL3A1, BCAM, BCL2L11, TNN, ITGA11, ITGA8, CNTN2, ITGB7, ITGB6, HPSE	2634	78	18082	1.93624	1	0.0963042	0.0935374
GOTERM_BP_DIRECT	GO:0019221~cytokine-mediated signaling pathway	35	0.960747	0.00321089	CX3CR1, CSF1R, LRRC15, CEBPA, IL1RN, EDA, LRTM1, IL1F9, IL6RA, CX3CL1, SOCS3, DUOX1, SOCS1, FLRT2, FLRT3, CCL2, TNFSF11, JAK2, STAT5A, STAT1, IL1R1, RTN4RL2, IRAK3, PODN, ASPN, IIGP1, DCN, IL1F10, EREG, GREM2, IL6, RTN4RL1, IL6ST, IFNAR1, PF4	2634	146	18082	1.64568	1	0.097253	0.0944589
GOTERM_BP_DIRECT	GO:0001822~kidney development	32	0.878397	0.00325379	FOXC2, CTNND1, TCF21, PKD1, PCSK5, GLI2, PKHD1, WNT11, BCL2L11, GPC3, WNT4, PDGFRB, TGFB2, ACE, FOXD1, IRX3, ARID5B, SOX11, CYS1, BMP6, AGT, DCN, VEGFA, AGTR1B, BMP4, MYO1E, WT1, ALDH1A2, MMP17, ITGA8, DCHS1, FAT4	2634	130	18082	1.68981	1	0.0980807	0.0952628
GOTERM_BP_DIRECT	GO:0009409~response to cold	14	0.384299	0.00328289	DIO2, ADRB1, ADM, FOS, HSPA2, SOD2, AGT, RBM3, PLAC8, IL6, ADRB3, P2RX3, PPARG, PPARGC1A	2634	40	18082	2.4027	1	0.0984868	0.0956573
GOTERM_BP_DIRECT	GO:0035025~positive regulation of Rho protein signal transduction	11	0.301949	0.00330628	PDGFRB, NGFR, GPR17, COL3A1, ADGRG1, GPR35, MCF2L, GPR65, F2R, LPAR4, F2RL2	2634	27	18082	2.79679	1	0.0987183	0.0958821
GOTERM_BP_DIRECT	GO:0031589~cell-substrate adhesion	9	0.247049	0.0033622	ANGPT1, TTYH1, ITGA2, GAS6, SMAD6, CORO1A, SORBS3, EPHB1, MYO1G	2634	19	18082	3.25177	1	0.0989807	0.096137
GOTERM_BP_DIRECT	GO:0006801~superoxide metabolic process	9	0.247049	0.0033622	NQO1, NRROS, SH3PXD2A, NOS2, CYBB, NOXO1, NOX4, SOD2, SOD3	2634	19	18082	3.25177	1	0.0989807	0.096137
GOTERM_BP_DIRECT	GO:1901741~positive regulation of myoblast fusion	9	0.247049	0.0033622	CD53, EHD2, CXCL9, CCL8, TNFSF14, GDF15, IL4RA, FLT3L, NFATC2	2634	19	18082	3.25177	1	0.0989807	0.096137
GOTERM_MF_DIRECT	GO:0042626~ATPase activity, coupled to transmembrane movement of substances	16	0.439198	0.00339204	ABCA1, ABCC1, ABCD2, ABCA8A, ABCA8B, ABCB4, ABCA4, TAP1, ABCC9, ABCB9, ABCA12, ABCB10, ABCG3, ABCB1A, ATP6V1D, ABCB1B	2559	49	17446	2.22612	0.99774	0.136725	0.133904
GOTERM_BP_DIRECT	GO:0060045~positive regulation of cardiac muscle cell proliferation	10	0.274499	0.00342166	TGFBR3, MEF2C, FGF9, HEY2, TBX20, RBPJ, ZFPM2, FGF2, WNT2, FGFR2	2634	23	18082	2.98471	1	0.100263	0.097382
GOTERM_MF_DIRECT	GO:0004871~signal transducer activity	121	3.32144	0.00343148	BC031181, VIPR1, OXTR, VIPR2, GPR68, IRS1, GPR65, CHRM5, MRGPRF, IRS3, CELSR3, RXFP3, GJA1, HTR6, EDNRB, HTR7, OLFR78, ADGRA2, RGS9, RGS6, CMKLR1, RGS7, PDGFRB, UNC13A, IL1R1, F2R, NPY1R, OMP, ADGRB2, PTGFR, CALCRL, GPR88, C5AR1, ADRB1, LPAR4, MCHR1, ADGRG1, ADGRG2, TBXA2R, ADGRG6, PLCG2, DRD1, DRD3, DRD4, DRD5, FZD1, STAT5A, CCR1, GPR17, FZD3, FZD2, FZD5, JUP, NEK6, FZD6, HTR1D, BST2, GPR183, CS…	2559	648	17446	1.27302	0.997895	0.136725	0.133904
GOTERM_BP_DIRECT	GO:0032760~positive regulation of tumor necrosis factor production	18	0.494098	0.00354039	SASH3, H2-T23, ARFGEF2, NOD1, NOD2, PIK3R1, RASGRP1, PYCARD, CCL4, CCL3, CCL2, LBP, CD14, JAK2, CCR5, TLR3, PF4, TLR2	2634	59	18082	2.09436	1	0.102785	0.0998324
GOTERM_BP_DIRECT	GO:0043408~regulation of MAPK cascade	18	0.494098	0.00354039	GDF10, MYLK2, TGFB2, GDF15, TGFB3, INHBB, GDF3, INHBA, BMP6, BMP5, GDF7, BMP3, PAK1, BMP2, ID1, TIMP2, STK40, TLR13	2634	59	18082	2.09436	1	0.102785	0.0998324
KEGG_PATHWAY	mmu04924:Renin secretion	21	0.576448	0.00358231	GUCY1A3, GUCY1A2, GUCY1B3, ACE, PDE1C, PDE1A, PTGER2, ADRB1, ITPR3, CACNA1C, AGT, ADCY5, AGTR1B, PPP3CA, ADRB3, KCNMA1, CLCA2, PDE3A, CALM1, PLCB2, KCNJ2	1170	71	7691	1.94428	0.633899	0.0223695	0.0176727
GOTERM_MF_DIRECT	GO:0005520~insulin-like growth factor binding	10	0.274499	0.00358908	NOV, IGFBP5, IGFBP4, IGFBP3, IGFBP2, CRIM1, IGFBP6, KAZALD1, WISP1, WISP2	2559	23	17446	2.96413	0.998414	0.139896	0.137009
GOTERM_BP_DIRECT	GO:0048015~phosphatidylinositol-mediated signaling	13	0.356849	0.00369106	PDGFRB, PDGFRA, CSF1R, GSN, IRS1, NPR3, IGF1, NGF, PIK3C2B, CAR8, EZR, OGT, KCNH1	2634	36	18082	2.47897	1	0.106181	0.103131
GOTERM_BP_DIRECT	GO:0048008~platelet-derived growth factor receptor signaling pathway	13	0.356849	0.00369106	PDGFRB, PDGFRA, NRP1, RGS14, ARID5B, PLAT, PTPRJ, IQGAP1, MYO1E, PDGFC, ABL1, TXNIP, JAK2	2634	36	18082	2.47897	1	0.106181	0.103131
GOTERM_BP_DIRECT	GO:0045444~fat cell differentiation	22	0.603898	0.00373024	GDF10, CEBPA, CEBPB, STEAP4, GPX1, CEBPD, ARID5B, INHBB, ARXES2, ARXES1, SMAD6, GDF6, PSMB8, NR4A2, NR4A3, SOCS1, ANGPTL8, ADGRF5, ID4, PPARG, SOX8, FBXO9	2634	79	18082	1.91173	1	0.106821	0.103752
KEGG_PATHWAY	mmu04620:Toll-like receptor signaling pathway	27	0.741147	0.00388122	CXCL9, CD40, PIK3R3, PIK3R1, PIK3R5, CCL4, CCL3, SPP1, MAP3K8, LBP, CD14, IKBKE, MAP2K6, MAP2K3, IFNAR2, MAP2K1, JUN, STAT1, FOS, MAPK13, NFKBIA, IL6, IRF7, TLR6, TLR3, TLR2, IFNAR1	1170	101	7691	1.75727	0.663399	0.0237092	0.0187311
GOTERM_BP_DIRECT	GO:0006936~muscle contraction	16	0.439198	0.00393127	RYR1, MYOM1, MYBPC1, ANXA1, ANXA2, TPM2, DYSF, LMOD1, ACTA2, MYH1, MYL6, COL4A3BP, MYH2, TNNT2, TBX20, DRD1	2634	50	18082	2.19675	1	0.111563	0.108358
GOTERM_BP_DIRECT	GO:0032956~regulation of actin cytoskeleton organization	16	0.439198	0.00393127	PDGFRB, TGFB2, ROCK1, HIP1R, ILK, CORO1A, BST2, PAK1, VANGL2, FSCN1, ABL1, SH3BGRL3, GPM6B, EPHA3, ARHGEF5, MYO1F	2634	50	18082	2.19675	1	0.111563	0.108358
GOTERM_CC_DIRECT	GO:0005783~endoplasmic reticulum	224	6.14878	0.00396876	IFITM3, SLC35B4, ARXES2, AQP5, ARXES1, ZDHHC2, GJA1, PRL2C3, ZC3H12A, KDR, CYP1B1, PIEZO1, PRL2C2, WLS, RSAD2, P3H2, ACSL6, ACSL4, CPED1, CH25H, SOAT2, PLPP3, H2-D1, RNF122, HACD1, CRABP2, MGST3, EIF5A2, THY1, UGT1A7C, HACD4, CYB5R3, FLRT2, FLRT3, STC2, RDH10, RRS1, SLAMF7, MLEC, ARSI, ARSG, DMPK, TREX1, PDE2A, IFI47, SQLE, EHD4, RNF103, NOX4, RYR2, FKBP14, MOGAT2, PIGN, CTSZ, AATK, SNX10, MAGT1,…	2814	1323	19662	1.18302	0.960718	0.0556995	0.0520044
GOTERM_BP_DIRECT	GO:0035457~cellular response to interferon-alpha	7	0.192149	0.00397111	IFI204, MYC, IFIT3B, IFIT1, GAS6, IFIT3, IFNAR1	2634	12	18082	4.00449	1	0.112188	0.108965
GOTERM_MF_DIRECT	GO:0001077~transcriptional activator activity, RNA polymerase II core promoter proximal region sequence-specific binding	57	1.56464	0.00403807	SPI1, TCF21, HOXC13, RBPJ, MEOX1, GLI2, SOX2, SOX18, MYC, HOXA7, PITX2, MYBL1, JUNB, MEF2C, MYOCD, FOXD1, TFEB, ETV1, SOX11, MITF, FOS, CYS1, EBF4, NPAS4, CREB3, HMGA1-RS1, PLSCR1, IRF1, PGR, FOXC2, CEBPA, CEBPB, CEBPD, PLAG1, DLX5, SRF, HIF1A, RELB, TBX20, NDN, CAMTA2, STAT5A, JUN, HMGA1, NFATC2, NR1H3, BATF, NFKB2, NR4A2, FOSL1, HEYL, MAFB, TFAP4, NR4A3, WT1, NFIB, MKX	2559	270	17446	1.43925	0.999293	0.144663	0.141677
GOTERM_MF_DIRECT	GO:0003774~motor activity	22	0.603898	0.00404908	MYH7B, DNAH17, MYO10, DCTN1, GPR88, DYNLL1, CCDC102A, MYO1D, MYO1E, MYH1, MYL6, MYO1B, MYH2, MYO1C, MYO18B, MYH14, MYH9, MYH11, MYO1H, MYH10, MYO1F, MYO1G	2559	79	17446	1.89855	0.999307	0.144663	0.141677
GOTERM_BP_DIRECT	GO:0048147~negative regulation of fibroblast proliferation	12	0.329399	0.00410126	PARP10, SFRP1, DACH1, CD300A, MYC, FTH1, DAB2IP, PMAIP1, PAWR, NUPR1, SOD2, MMP9	2634	32	18082	2.57432	1	0.115348	0.112034
GOTERM_CC_DIRECT	GO:0030017~sarcomere	13	0.356849	0.00410672	FHOD3, MYOM1, RYR2, ARHGEF25, ACTN1, TRPC1, LMOD1, ILK, ABCC9, ACTA1, TNNT2, HABP4, CALM1	2814	37	19662	2.45496	0.964907	0.0566588	0.0529001
GOTERM_MF_DIRECT	GO:0017166~vinculin binding	7	0.192149	0.00411478	SYNM, ACTN1, DAG1, DMD, UTRN, TLN1, SORBS3	2559	12	17446	3.97688	0.999384	0.144663	0.141677
GOTERM_MF_DIRECT	GO:0044548~S100 protein binding	7	0.192149	0.00411478	ANXA2, AHNAK, S100A6, IQGAP1, S100B, EZR, KCNK3	2559	12	17446	3.97688	0.999384	0.144663	0.141677
GOTERM_MF_DIRECT	GO:0048407~platelet-derived growth factor binding	7	0.192149	0.00411478	PDGFRB, PDGFRA, COL3A1, COL2A1, COL5A1, COL4A1, COL6A1	2559	12	17446	3.97688	0.999384	0.144663	0.141677
KEGG_PATHWAY	mmu04014:Ras signaling pathway	51	1.39995	0.00421292	FLT4, FGF2, FGF5, FGF7, HTR7, FGF9, KDR, PDGFRB, PDGFRA, MAP2K1, HGF, PLA2G4C, PLA2G4A, NGF, RASA4, MET, CSF1R, RALB, PIK3R3, RASAL1, PIK3R1, RASAL2, RASAL3, RASGRP1, EGFR, RASGRP3, PIK3R5, PAK1, GNG3, GNG4, PDGFC, PLCG2, ABL1, GNG8, NGFR, ANGPT4, ANGPT2, PLA2G2E, ANGPT1, VEGFC, VEGFD, IGF1, VEGFA, EFNA1, FGF14, KITL, FGF18, GNB5, CALM1, FGF13, FGFR2	1170	229	7691	1.46397	0.693368	0.0251879	0.0198993
GOTERM_BP_DIRECT	GO:0071407~cellular response to organic cyclic compound	21	0.576448	0.00441	STAT5A, P2RY12, CEBPA, CEBPB, MEF2C, SLC16A1, IGFBP5, NOS2, STAT1, FOXF1, SMAD9, NOD2, GLI2, NFKBIA, PAK1, BMP2, SOCS1, CCL3, CYP1B1, ALPL, PPARG	2634	75	18082	1.92216	1	0.12348	0.119932
GOTERM_BP_DIRECT	GO:2000352~negative regulation of endothelial cell apoptotic process	11	0.301949	0.00448129	SEMA5A, ANGPT1, TNIP2, ABL1, KDR, TNFAIP3, NDNF, ANGPTL4, GAS6, SCG2, ICAM1	2634	28	18082	2.6969	1	0.123825	0.120268
GOTERM_BP_DIRECT	GO:0086091~regulation of heart rate by cardiac conduction	11	0.301949	0.00448129	HCN4, CACNB2, JUP, CAV1, GJA5, KCNE1L, KCNA5, CACNA1C, SCN3B, KCNJ2, SCN1B	2634	28	18082	2.6969	1	0.123825	0.120268
GOTERM_BP_DIRECT	GO:0008045~motor neuron axon guidance	11	0.301949	0.00448129	NRP1, ALCAM, KIF5C, CHN1, SLIT1, CXCR4, LHX4, PLXNA4, EPHA3, RNF165, FOXP1	2634	28	18082	2.6969	1	0.123825	0.120268
GOTERM_BP_DIRECT	GO:0043123~positive regulation of I-kappaB kinase/NF-kappaB signaling	35	0.960747	0.00451843	BC031181, CD40, EDA, TRAF3IP2, CLEC4N, NOD1, NOD2, ZC3HAV1, CXXC5, MALT1, TRIM8, GJA1, CASP1, ABL1, TRIM25, FLNA, TNFSF11, IKBKE, PLEKHG5, NEK6, F2R, TNFRSF19, S100B, MID2, BST2, GPRC5B, TNIP2, CTH, TRAF5, S100A4, PRKD1, TLR6, CCDC22, TLR3, BIRC2	2634	149	18082	1.61255	1	0.124306	0.120735
GOTERM_BP_DIRECT	GO:0045597~positive regulation of cell differentiation	15	0.411749	0.00455423	MAP2K1, JUN, SRF, SMAD9, WNT9A, FGF2, SOX2, BMP4, BTC, SOCS3, BMP2, GDNF, PPP1R13L, JAK2, JUNB	2634	46	18082	2.23854	1	0.124746	0.121162
[truncated: 778 more rows]

## Sheet: KEGG（2倍）
Category	Term	Count	%	PValue	Genes	List Total	Pop Hits	Pop Total	Fold Enrichment	Bonferroni	Benjamini	FDR
[truncated: 98 more rows]

[truncated: 2 more sheets: KEGG富集（微生信）, cGMP-PKG（2倍）]
